# Supplementary material for: Transcriptional Profiling Suggests Extensive Metabolic Rewiring of Human and Mouse Macrophages during Early Interferon Alpha Responses
Source: Mediators Inflamm. 2018 Jul 25;2018:5906819. doi: 10.1155/2018/5906819 (PMC6083555; doi:10.1155/2018/5906819)
Supplement: Supplementary Table S2 — A list of all metabolic genes identified in the MDM dataset. [file 5906819.f2.csv]

Entrez Gene ID	Gene Symbol	Gene Title	Fold Change	P-value	FDR
3717	Jak2	Janus kinase 2	3.176442035	1.89E-05	0.009626464
5533	PPP3CC	protein phosphatase 3 (formerly 2B), catalytic subunit, gamma isoform	2.236796632	3.69E-05	0.009626464
11011	TLK2	tousled-like kinase 2	2.723902258	5.34E-05	0.009626464
64761	PARP12	poly (ADP-ribose) polymerase family, member 12	2.268545122	5.51E-05	0.009626464
23032	usp33	ubiquitin specific peptidase 33	1.424304128	8.84E-05	0.012347387
5775	PTPN4	protein tyrosine phosphatase, non-receptor type 4 (megakaryocyte)	-2.019230769	0.000126639	0.014743477
5142	Pde4b	phosphodiesterase 4B, cAMP-specific (phosphodiesterase E4 dunce homolog, Drosophila)	6.353167421	0.000219268	0.01954339
8972	LOC642103	similar to Maltase-glucoamylase, intestinal	4.678397401	0.000227478	0.019862463
2180	ACSL1	acyl-CoA synthetase long-chain family member 1	2.276471249	0.000299749	0.022328244
10135	NAMPT	nicotinamide phosphoribosyltransferase	3.449473394	0.000333035	0.023235697
2710	GK3P	glycerol kinase 3 pseudogene; glycerol kinase	1.734060126	0.000399571	0.024743665
10114	Hipk3	homeodomain interacting protein kinase 3	1.428000731	0.00043734	0.025457846
3631	INPP4A	inositol polyphosphate-4-phosphatase, type I, 107kDa	-2.212373403	0.000533679	0.027130062
1540	CYLD	cylindromatosis (turban tumor syndrome)	2.379340161	0.000578609	0.02777314
1545	CYP1B1	cytochrome P450, family 1, subfamily B, polypeptide 1	1.536850634	0.00061728	0.028271811
5168	ENPP2	ectonucleotide pyrophosphatase/phosphodiesterase 2	4.555245536	0.000658928	0.028760166
5610	EIF2AK2	eukaryotic translation initiation factor 2-alpha kinase 2	3.172761189	0.000766088	0.02982837
80146	UXS1	UDP-glucuronate decarboxylase 1	1.72644305	0.000832114	0.030378889
6793	STK10	serine/threonine kinase 10	-1.505346834	0.000951721	0.03121907
7326	ube2g1	ubiquitin-conjugating enzyme E2G 1 (UBC7 homolog, yeast)	-1.466456551	0.001118083	0.032139186
8050	PDHX	pyruvate dehydrogenase complex, component X	1.515724075	0.001145705	0.032270365
1847	dusp5	dual specificity phosphatase 5	3.340292904	0.001175946	0.032408057
57205	ATP10D	ATPase, class V, type 10D	-1.776333151	0.001201864	0.032521428
84446	Brsk1	BR serine/threonine kinase 1	1.901541473	0.001205886	0.032538653
3735	KARS	lysyl-tRNA synthetase	1.388079266	0.001276889	0.03282757
9334	B4galt5	UDP-Gal:betaGlcNAc beta 1,4- galactosyltransferase, polypeptide 5	3.402661392	0.001313586	0.032966452
51056	LAP3	leucine aminopeptidase 3	1.775856261	0.001382687	0.033210778
57194	ATP10A	ATPase, class V, type 10A	4.50365991	0.001432711	0.033374956
4329	Aldh6a1	aldehyde dehydrogenase 6 family, member A1	-1.383277751	0.00148105	0.033524465
1845	DUSP3	dual specificity phosphatase 3	1.37165016	0.001529507	0.033666079
1358	Cpa2	carboxypeptidase A2 (pancreatic)	2.552860581	0.001558649	0.033747544
644	BLVRA	biliverdin reductase A	1.543476104	0.001572607	0.033785629
5566	PRKACA	protein kinase, cAMP-dependent, catalytic, alpha	-1.283686438	0.00163361	0.033945368
2643	GCH1	GTP cyclohydrolase 1	22.51211827	0.00168855	0.034080523
4507	mtaP	methylthioadenosine phosphorylase	-1.449461181	0.001710178	0.034131625
5170	PDPK1	3-phosphoinositide dependent protein kinase-1	-1.863121997	0.001930762	0.035481103
8767	RIPK2	receptor-interacting serine-threonine kinase 2	2.667919845	0.001976239	0.035733161
4067	LYN	v-yes-1 Yamaguchi sarcoma viral related oncogene homolog	2.093221291	0.001989009	0.035802489
57134	MAN1C1	mannosidase, alpha, class 1C, member 1	-1.582216378	0.002079782	0.036277896
2982	GUCY1A3	guanylate cyclase 1, soluble, alpha 3	5.151509288	0.002184699	0.036791986
6732	srpk1	SFRS protein kinase 1	-1.272243848	0.002247686	0.037083911
83666	PARP9	poly (ADP-ribose) polymerase family, member 9	2.333171989	0.002314603	0.037381332
23522	MYST4	MYST histone acetyltransferase (monocytic leukemia) 4	-1.62313776	0.002324939	0.037426156
9360	PPIG	peptidylprolyl isomerase G (cyclophilin G)	-1.583214615	0.002369397	0.037615674
7324	UBE2E1	ubiquitin-conjugating enzyme E2E 1 (UBC4/5 homolog, yeast)	1.442896993	0.002653071	0.038894382
23235	sik2	salt-inducible kinase 2	-1.786662371	0.002711884	0.039135368
7453	wars	tryptophanyl-tRNA synthetase	1.658944092	0.00290553	0.039878216
2766	gmpr	guanosine monophosphate reductase	2.749061871	0.002999607	0.040213477
5156	pdgfra	platelet-derived growth factor receptor, alpha polypeptide	1.588831141	0.003062447	0.040428879
9517	Sptlc2	serine palmitoyltransferase, long chain base subunit 2	1.875557924	0.003370893	0.041397409
1786	dnmt1	DNA (cytosine-5-)-methyltransferase 1	-1.60667661	0.003464848	0.041666147
7803	ptp4a1	protein tyrosine phosphatase type IVA, member 1	1.242831769	0.003508042	0.041785979
440275	EIF2AK4	eukaryotic translation initiation factor 2 alpha kinase 4	-1.49733942	0.003768404	0.042462805
8396	PIP4K2B	phosphatidylinositol-5-phosphate 4-kinase, type II, beta	-2.138083846	0.00394791	0.042888389
3712	ivd	isovaleryl Coenzyme A dehydrogenase	-1.435863512	0.003949978	0.042893114
79567	fam65a	family with sequence similarity 65, member A	-1.354944755	0.004017378	0.043044999
53944	CSNK1G1	casein kinase 1, gamma 1	1.408733745	0.004064968	0.043149832
2713	GK3P	glycerol kinase 3 pseudogene; glycerol kinase	1.619606797	0.004097267	0.043219878
1119	CHKA	choline kinase alpha	-1.815764202	0.004109151	0.04324543
7321	UBE2D1	ubiquitin-conjugating enzyme E2D 1 (UBC4/5 homolog, yeast)	1.479857324	0.004119486	0.043267556
7375	USP4	ubiquitin specific peptidase 4 (proto-oncogene)	-1.718822006	0.004200786	0.043438572
2530	fut8	fucosyltransferase 8 (alpha (1,6) fucosyltransferase)	-1.680199299	0.004282877	0.043605964
11274	usp18	ubiquitin specific peptidase 18	13.47734962	0.004390664	0.043818084
9246	Ube2l6	ubiquitin-conjugating enzyme E2L 6	2.006129475	0.004572293	0.04415713
7328	Ube2h	ubiquitin-conjugating enzyme E2H (UBC8 homolog, yeast)	1.954938776	0.004630054	0.044260409
9958	USP15	ubiquitin specific peptidase 15	1.552271215	0.004717116	0.044412172
57695	USP37	ubiquitin specific peptidase 37	-1.718848667	0.004861077	0.044653315
415116	PIM3	pim-3 oncogene	2.069768168	0.004865273	0.044660167
7329	UBE2I	ubiquitin-conjugating enzyme E2I (UBC9 homolog, yeast)	-1.832811622	0.004876456	0.044678383
9262	STK17B	serine/threonine kinase 17b	2.270061131	0.004915559	0.04474154
84196	usp48	ubiquitin specific peptidase 48	-1.58416366	0.005055249	0.044960556
51805	COQ3	coenzyme Q3 homolog, methyltransferase (S. cerevisiae)	-1.448330684	0.005139767	0.045088271
84930	MASTL	microtubule associated serine/threonine kinase-like	4.491826699	0.005215961	0.045200455
1267	CNP	2',3'-cyclic nucleotide 3' phosphodiesterase	1.98249846	0.005324094	0.045355062
64324	NSD1	nuclear receptor binding SET domain protein 1	-1.988160452	0.005375416	0.045426621
91	ACVR1B	activin A receptor, type IB	2.032740214	0.005493154	0.045586545
4145	matK	megakaryocyte-associated tyrosine kinase	-1.224762585	0.005518569	0.045620314
7046	tgfbr1	transforming growth factor, beta receptor 1	-5.350318471	0.005529349	0.045634558
10007	gnpda1	glucosamine-6-phosphate deaminase 1	-1.830862137	0.00558322	0.04570505
2592	galT	galactose-1-phosphate uridylyltransferase	-1.24380378	0.005607129	0.04573597
7320	ube2b	ubiquitin-conjugating enzyme E2B (RAD6 homolog)	1.272065846	0.00580991	0.045989551
23463	icmt	isoprenylcysteine carboxyl methyltransferase	-1.300941781	0.005845576	0.04603261
1387	CREBBP	CREB binding protein	1.704566681	0.00590997	0.046109235
29943	PADI1	peptidyl arginine deiminase, type I	1.552520606	0.006110204	0.046338697
80222	TARS2	threonyl-tRNA synthetase 2, mitochondrial (putative)	-1.75809901	0.006228721	0.046468568
5058	Pak1	p21 protein (Cdc42/Rac)-activated kinase 1	-1.763881509	0.006339065	0.046585739
6872	TAF1	TAF1 RNA polymerase II, TATA box binding protein (TBP)-associated factor, 250kDa	-1.630926171	0.006343811	0.0465907
2648	KAT2A	K(lysine) acetyltransferase 2A	-1.570847851	0.006435971	0.046685792
80339	pnpla3	patatin-like phospholipase domain containing 3	-4.291685273	0.006518225	0.046768708
84132	Usp42	ubiquitin specific peptidase 42	1.307377049	0.006593003	0.046842539
490	ATP2B1	ATPase, Ca++ transporting, plasma membrane 1	4.46833608	0.006640186	0.046888386
80854	setd7	SET domain containing (lysine methyltransferase) 7	-1.511944444	0.006834107	0.047071055
10038	PARP2	poly (ADP-ribose) polymerase 2	-1.507239033	0.006897893	0.047129192
79834	SGK269	NKF3 kinase family member	4.019939169	0.006992975	0.047214142
5520	Ppp2r2a	protein phosphatase 2 (formerly 2A), regulatory subunit B, alpha isoform	1.885082935	0.007159253	0.047357973
9263	STK17A	serine/threonine kinase 17a	4.099908521	0.007165978	0.047363668
254531	lpcat4	lysophosphatidylcholine acyltransferase 4	-1.862049095	0.007173126	0.047369711
11044	papd7	polymerase (DNA directed) sigma	1.799687322	0.007212868	0.047403116
1854	dut	deoxyuridine triphosphatase	-1.532563318	0.007214096	0.047404144
224	aldh3a2	aldehyde dehydrogenase 3 family, member A2	-1.6879473	0.007250372	0.047434348
5128	Cdk17	PCTAIRE protein kinase 2	1.889569707	0.007422356	0.047574027
8459	TPST2	tyrosylprotein sulfotransferase 2	-1.496677556	0.007561528	0.047682974
23659	PLA2G15	phospholipase A2, group XV	-1.662287381	0.00763508	0.047739143
55781	RIOK2	RIO kinase 2 (yeast)	-2.063210943	0.007713245	0.047797801
8737	RIPK1	receptor (TNFRSF)-interacting serine-threonine kinase 1	2.134154689	0.007726296	0.047807493
9100	USP10	ubiquitin specific peptidase 10	-1.253374233	0.008011198	0.048012117
6850	SYK	spleen tyrosine kinase	-2.637595057	0.0081578	0.048112476
22928	SEPHS2	selenophosphate synthetase 2	-1.284633014	0.008195197	0.048137568
146057	TTBK2	tau tubulin kinase 2	-1.877841513	0.008232357	0.0481623
5780	Ptpn9	protein tyrosine phosphatase, non-receptor type 9	-1.325304665	0.008277507	0.048192086
55589	bmp2k	BMP2 inducible kinase	1.288683122	0.008295845	0.048204101
80025	PANK2	pantothenate kinase 2	1.453978849	0.00835291	0.048241191
5147	PDE6D	phosphodiesterase 6D, cGMP-specific, rod, delta	-1.452982046	0.008390303	0.048265252
2683	B4GALT1	UDP-Gal:betaGlcNAc beta 1,4- galactosyltransferase, polypeptide 1	2.401376833	0.008517158	0.048345476
54926	ube2r2	ubiquitin-conjugating enzyme E2R 2	-1.350503825	0.008526403	0.04835124
1849	Dusp7	dual specificity phosphatase 7	-3.180855429	0.008575861	0.048381885
2820	Gpd2	glycerol-3-phosphate dehydrogenase 2 (mitochondrial)	1.636963375	0.008588529	0.048389684
1788	DNMT3A	DNA (cytosine-5-)-methyltransferase 3 alpha	-1.315875204	0.008627506	0.048413552
26191	PTPN22	protein tyrosine phosphatase, non-receptor type 22 (lymphoid)	-2.232734018	0.008710487	0.04846373
9953	Hs3st3b1	heparan sulfate (glucosamine) 3-O-sulfotransferase 3B1	7.626608267	0.00872314	0.048471307
65264	Ube2z	ubiquitin-conjugating enzyme E2Z	1.688868263	0.008723812	0.048471708
2181	ACSL3	acyl-CoA synthetase long-chain family member 3	-1.37523256	0.008938441	0.048597283
3718	JAK3	Janus kinase 3	1.859792459	0.008953383	0.048605825
5770	ptpn1	protein tyrosine phosphatase, non-receptor type 1	1.675983543	0.009007059	0.0486363
5771	PTPN2	protein tyrosine phosphatase, non-receptor type 2	1.869886416	0.009115179	0.048696709
6713	sqlE	squalene epoxidase	-1.603028163	0.009122876	0.04870096
64132	Xylt2	xylosyltransferase II	-1.527253219	0.009178441	0.048731462
26750	RPS6KC1	ribosomal protein S6 kinase, 52kDa, polypeptide 1	1.527532091	0.009302389	0.048798323
51251	NT5C3	5'-nucleotidase, cytosolic III	10.33577639	0.009328705	0.048812314
31	ACACA	acetyl-Coenzyme A carboxylase alpha	-1.670310108	0.009371419	0.048834871
64781	CERK	ceramide kinase	-1.844458538	0.00949232	0.048897728
79858	Nek11	NIMA (never in mitosis gene a)- related kinase 11	-1.430521559	0.009579316	0.048942073
5332	Plcb4	phospholipase C, beta 4	-2.89588581	0.009660621	0.048982866
57097	parp11	poly (ADP-ribose) polymerase family, member 11	1.963592587	0.009678755	0.04899188
30849	PIK3R4	phosphoinositide-3-kinase, regulatory subunit 4	-1.60314881	0.009839837	0.049173574
8658	tnks	tankyrase, TRF1-interacting ankyrin-related ADP-ribose polymerase	-2.054385105	0.009896829	0.049236757
51465	UBE2J1	ubiquitin-conjugating enzyme E2, J1 (UBC6 homolog, yeast)	1.266212667	0.009992214	0.049341245
5494	PPM1A	protein phosphatase 1A (formerly 2C), magnesium-dependent, alpha isoform	-1.38215575	0.01023136	0.049596501
1152	CKB	creatine kinase, brain	18.10200364	0.010332182	0.049701333
23387	SIK3	serine/threonine-protein kinase QSK	2.079630244	0.010425811	0.049797257
8540	AGPS	alkylglycerone phosphate synthase	-1.954055949	0.010556209	0.049928615
7048	Tgfbr2	transforming growth factor, beta receptor II (70/80kDa)	-1.586607216	0.010738002	0.050107529
2241	FER	FER tyrosine kinase [Source:HGNC Symbol;Acc:HGNC:3655]	-1.511661596	0.010749043	0.050118241
535	ATP6V0A1	ATPase, H+ transporting, lysosomal V0 subunit a1	-1.345066732	0.01076715	0.05013577
2872	MKNK2	MAP kinase interacting serine/threonine kinase 2	-1.999631879	0.010786917	0.050154853
124454	Ears2	glutamyl-tRNA synthetase 2, mitochondrial (putative)	-1.518814573	0.010852733	0.050217994
8576	STK16	serine/threonine kinase 16	-1.234711757	0.010856307	0.050221406
247	ALOX15B	arachidonate 15-lipoxygenase, type B	1.669456728	0.010954431	0.050341938
528	ATP6V1C1	ATPase, H+ transporting, lysosomal 42kDa, V1 subunit C1	-1.365365747	0.011361135	0.05102995
6484	ST3GAL4	ST3 beta-galactoside alpha-2,3-sialyltransferase 4	1.480169638	0.011477678	0.051221403
5778	PTPN7	protein tyrosine phosphatase, non-receptor type 7	-1.298490639	0.011705755	0.051589033
51611	DPH5	DPH5 homolog (S. cerevisiae)	-2.417811985	0.01186733	0.051843981
5287	PIK3C2B	phosphoinositide-3-kinase, class 2, beta polypeptide	-1.553958442	0.012066509	0.052152196
2582	galE	UDP-galactose-4-epimerase	-1.35183861	0.012427059	0.052693725
152926	Ppm1k	protein phosphatase 1K (PP2C domain containing)	10.06713653	0.012507879	0.052812311
4122	MAN2A2	mannosidase, alpha, class 2A, member 2	-1.370467073	0.012551799	0.052876335
1890	Tymp	thymidine phosphorylase	1.796959673	0.012711859	0.0531072
87178	Pnpt1	polyribonucleotide nucleotidyltransferase 1	5.452123718	0.013163222	0.053738106
5321	pla2g4a	phospholipase A2, group IVA (cytosolic, calcium-dependent)	1.565368357	0.013296675	0.053919166
55683	KIAA1310	KIAA1310	-2.330246914	0.013491254	0.054178851
8731	rnmt	RNA (guanine-7-) methyltransferase	-1.527898193	0.013565003	0.054275968
10068	IL18BP	interleukin 18 binding protein	-1.276366052	0.013600799	0.054322851
5980	REV3L	REV3-like, catalytic subunit of DNA polymerase zeta (yeast)	-1.931948052	0.013632845	0.054364682
4047	LSS	lanosterol synthase (2,3-oxidosqualene-lanosterol cyclase)	1.553256406	0.013695119	0.054445593
993	CDC25A	cell division cycle 25 homolog A (S. pombe)	-2.484171322	0.013822269	0.054609265
2651	GCNT2	glucosaminyl (N-acetyl) transferase 2, I-branching enzyme (I blood group)	1.984681677	0.013827392	0.054615817
1457	Csnk2a1	casein kinase 2, alpha 1 polypeptide pseudogene; casein kinase 2, alpha 1 polypeptide	1.381789699	0.013919452	0.054732996
9128	PRPF4	PRP4 pre-mRNA processing factor 4 homolog (yeast)	-1.424481499	0.013990919	0.054823242
7226	TRPM2	transient receptor potential cation channel, subfamily M, member 2	-1.297206038	0.014127365	0.054993813
5859	QARS	glutaminyl-tRNA synthetase	-1.25667101	0.014160213	0.055034542
8790	TNNI3K	TNNI3 interacting kinase; fucose-1-phosphate guanylyltransferase	-1.517734298	0.014361935	0.055281864
2590	GALNT2	UDP-N-acetyl-alpha-D-galactosamine:polypeptide N-acetylgalactosaminyltransferase 2 (GalNAc-T2)	1.386324231	0.014649497	0.055626319
51086	TNNI3K	TNNI3 interacting kinase; fucose-1-phosphate guanylyltransferase	-2.051538154	0.014676639	0.055658351
51728	POLR3K	polymerase (RNA) III (DNA directed) polypeptide K, 12.3 kDa	-1.322890202	0.014792563	0.055794244
100	ada	adenosine deaminase	4.346509404	0.014832229	0.055840406
57602	usp36	ubiquitin specific peptidase 36	-1.693387567	0.014872946	0.055887613
55703	Polr3b	polymerase (RNA) III (DNA directed) polypeptide B	-1.498807741	0.014966709	0.055995645
5292	Pim1	pim-1 oncogene	2.956010707	0.01500815	0.056043094
8942	Kynu	kynureninase (L-kynurenine hydrolase)	1.903990831	0.015011934	0.056047418
6733	SRPK2	SFRS protein kinase 2	-2.022164838	0.015372298	0.056452346
8202	NCOA3	nuclear receptor coactivator 3	1.412452886	0.015377275	0.056457845
4215	MAP3K3	mitogen-activated protein kinase kinase kinase 3	-1.498128374	0.015415069	0.056499526
11072	Dusp14	dual specificity phosphatase 14	-1.263425228	0.01551846	0.056612825
55033	FKBP14	FK506 binding protein 14, 22 kDa	-1.418876685	0.015546295	0.056643146
7334	UBE2N	ubiquitin-conjugating enzyme E2N (UBC13 homolog, yeast)	1.221237274	0.015598409	0.056699711
9583	entpd4	ectonucleoside triphosphate diphosphohydrolase 4	-1.521409161	0.01577626	0.056890771
23305	Acsl6	acyl-CoA synthetase long-chain family member 6	2.395987085	0.015853775	0.056973097
6790	AURKA	aurora kinase A; aurora kinase A pseudogene 1	-1.545986291	0.015932157	0.057055767
6714	Src	v-src sarcoma (Schmidt-Ruppin A-2) viral oncogene homolog (avian)	3.263054187	0.015964988	0.057090224
8460	TPST1	tyrosylprotein sulfotransferase 1	-1.50479829	0.016073067	0.057202951
3707	Itpkb	inositol 1,4,5-trisphosphate 3-kinase B	-2.294581799	0.016156936	0.05728969
10667	FARS2	phenylalanyl-tRNA synthetase 2, mitochondrial	-1.442123224	0.016369572	0.057510007
8394	PIP5K1A	phosphatidylinositol-4-phosphate 5-kinase, type I, alpha	1.611574409	0.016474363	0.057617099
3611	ILK	integrin-linked kinase	-1.230120453	0.016648428	0.057792868
57486	NLN	neurolysin (metallopeptidase M3 family)	-1.414858517	0.017074786	0.058212553
5599	mapk8	mitogen-activated protein kinase 8	1.562213849	0.017099884	0.05823679
2983	gucy1b3	guanylate cyclase 1, soluble, beta 3	2.612676894	0.017123995	0.058260027
23759	ppil2	peptidylprolyl isomerase (cyclophilin)-like 2	-1.353524983	0.017436953	0.058557433
4234	mettl1	methyltransferase like 1	1.420604722	0.017631323	0.058738302
65220	nadK	NAD kinase	1.261872496	0.017680719	0.058783808
4117	mak	male germ cell-associated kinase	3.065856777	0.0176951	0.058797022
8833	GMPS	guanine monphosphate synthetase	-1.413216213	0.017725958	0.058825324
3636	INPPL1	inositol polyphosphate phosphatase-like 1	-1.351867442	0.018203969	0.059254797
84105	pcbd2	pterin-4 alpha-carbinolamine dehydratase/dimerization cofactor of hepatocyte nuclear factor 1 alpha (TCF1) 2	-1.507746849	0.018398902	0.059425252
790	cad	carbamoyl-phosphate synthetase 2, aspartate transcarbamylase, and dihydroorotase	-1.789009913	0.018414828	0.059439061
23043	TNIK	TRAF2 and NCK interacting kinase	1.857638049	0.018441539	0.059462183
18	ABAT	4-aminobutyrate aminotransferase	-1.774068554	0.018497385	0.059510367
661	Polr3d	polymerase (RNA) III (DNA directed) polypeptide D, 44kDa	1.637941615	0.018613821	0.059610146
4724	NDUFS4	NADH dehydrogenase (ubiquinone) Fe-S protein 4, 18kDa (NADH-coenzyme Q reductase)	1.203268543	0.018836049	0.059798064
22929	sephs1	selenophosphate synthetase 1; similar to selenophosphate synthetase 1	-1.39606852	0.018983785	0.059921195
84532	acss1	acyl-CoA synthetase short-chain family member 1	-2.318760469	0.019060957	0.059984954
5832	ALDH18A1	aldehyde dehydrogenase 18 family, member A1	-1.658685136	0.01912421	0.06003693
58497	PRUNE	prune homolog (Drosophila)	-1.229622011	0.019161715	0.060067628
6648	Sod2	superoxide dismutase 2, mitochondrial	2.43566546	0.019162311	0.060068115
9957	Hs3st1	heparan sulfate (glucosamine) 3-O-sulfotransferase 1	-5.661637931	0.019181255	0.060083587
54995	OXSM	3-oxoacyl-ACP synthase, mitochondrial	-1.220259689	0.019398131	0.060408002
8564	kmo	kynurenine 3-monooxygenase (kynurenine 3-hydroxylase)	2.401635848	0.019692538	0.060842376
22978	NT5C2	5'-nucleotidase, cytosolic II	1.224538593	0.019845045	0.061064712
259230	sgms1	sphingomyelin synthase 1	1.590343998	0.019848409	0.061069596
3613	Impa2	inositol(myo)-1(or 4)-monophosphatase 2	-1.691855337	0.020022015	0.06132046
4140	Mark3	MAP/microtubule affinity-regulating kinase 3	1.50324366	0.020565835	0.062091569
84869	cbr4	carbonyl reductase 4	-2.948713637	0.020758412	0.062359409
5594	MAPK1	mitogen-activated protein kinase 1	-1.262452924	0.020847369	0.062482229
5256	PHKA2	phosphorylase kinase, alpha 2 (liver)	-1.569109739	0.021260613	0.063045434
55904	MLL5	myeloid/lymphoid or mixed-lineage leukemia 5 (trithorax homolog, Drosophila)	-1.322164611	0.021356508	0.063174425
953	ENTPD1	ectonucleoside triphosphate diphosphohydrolase 1	-1.736780028	0.021948579	0.063957031
80896	NPL	N-acetylneuraminate pyruvate lyase (dihydrodipicolinate synthase)	-1.366415664	0.022211657	0.064297326
10087	COL4A3BP	collagen, type IV, alpha 3 (Goodpasture antigen) binding protein	-1.809198753	0.022265823	0.064366835
613	bcr	breakpoint cluster region	-1.253805676	0.022293307	0.064402032
4258	mgst2	microsomal glutathione S-transferase 2	-1.317131823	0.022527586	0.064700106
5286	pik3c2a	phosphoinositide-3-kinase, class 2, alpha polypeptide	-1.339131678	0.023356613	0.065727587
5209	pfkfb3	6-phosphofructo-2-kinase/fructose-2,6-biphosphatase 3	2.616625446	0.023382382	0.06575886
587	BCAT2	branched chain aminotransferase 2, mitochondrial	-1.337489114	0.023407651	0.065789489
64064	OXCT2	3-oxoacid CoA transferase 2	-1.363425926	0.023428586	0.065814836
4704	NDUFA9	NADH dehydrogenase (ubiquinone) 1 alpha subcomplex, 9, 39kDa	1.276695565	0.023720041	0.066165054
55500	etnk1	ethanolamine kinase 1	-1.681604204	0.023818649	0.066282432
6446	SGK1	serum/glucocorticoid regulated kinase 1	-1.572048822	0.023852303	0.066322364
10623	POLR3C	polymerase (RNA) III (DNA directed) polypeptide C (62kD)	1.665437849	0.023889008	0.066365843
622	BDH1	3-hydroxybutyrate dehydrogenase, type 1	-1.309873445	0.024009723	0.066508296
5294	PIK3CG	phosphoinositide-3-kinase, catalytic, gamma polypeptide	-1.672378469	0.024138588	0.066659461
26873	oplaH	5-oxoprolinase (ATP-hydrolysing)	-1.461792266	0.024260948	0.066802136
4247	mgat2	mannosyl (alpha-1,6-)-glycoprotein beta-1,2-N-acetylglucosaminyltransferase	1.287291603	0.024617873	0.06721361
2762	Gmds	GDP-mannose 4,6-dehydratase	-1.538454012	0.024622734	0.067219166
3033	hadh	hydroxyacyl-Coenzyme A dehydrogenase	-1.363928234	0.024722187	0.06733256
3480	IGF1R	insulin-like growth factor 1 receptor	-2.016932537	0.024776768	0.067394567
54434	SSH1	slingshot homolog 1 (Drosophila)	-1.252957746	0.02495636	0.067597472
58190	Ctdsp1	CTD (carboxy-terminal domain, RNA polymerase II, polypeptide A) small phosphatase 1	-1.762365912	0.02498294	0.067627357
4548	mtr	5-methyltetrahydrofolate-homocysteine methyltransferase	-1.531845616	0.025219173	0.067891343
84875	PARP10	poly (ADP-ribose) polymerase family, member 10	1.927591019	0.025305616	0.067987216
54986	Ulk4	unc-51-like kinase 4 (C. elegans)	-1.889537599	0.025774709	0.068609515
7327	UBE2G2	ubiquitin-conjugating enzyme E2G 2 (UBC7 homolog, yeast)	-1.496831024	0.025857483	0.068718135
5442	Polrmt	polymerase (RNA) mitochondrial (DNA directed)	-1.768789068	0.026139324	0.06908535
4217	MAP3K5	mitogen-activated protein kinase kinase kinase 5	1.563246007	0.026149901	0.069099052
1432	Mapk14	mitogen-activated protein kinase 14	-1.39769359	0.026275741	0.069261644
11201	poli	polymerase (DNA directed) iota	-1.557776285	0.026736344	0.069892141
113	ADCY7	adenylate cyclase 7	-1.446133251	0.02702112	0.070276759
158	ADSL	adenylosuccinate lyase	-1.201195517	0.027719333	0.07120339
79813	EHMT1	euchromatic histone-lysine N-methyltransferase 1	-1.54112346	0.027811219	0.071323636
5048	Pafah1b1	platelet-activating factor acetylhydrolase, isoform Ib, subunit 1 (45kDa)	1.348842132	0.027857874	0.071384542
8899	prpf4b	similar to hCG1820375; PRP4 pre-mRNA processing factor 4 homolog B (yeast)	1.485915952	0.027953872	0.071509549
3163	Hmox2	heme oxygenase (decycling) 2	-1.299525084	0.028170872	0.071790571
11329	stk38	serine/threonine kinase 38	-1.661329305	0.028668185	0.072426615
157285	SGK223	homolog of rat pragma of Rnd2	-3.023450347	0.028912045	0.072734503
84693	MCEE	methylmalonyl CoA epimerase	-1.397458948	0.028982094	0.072822464
5422	polA1	polymerase (DNA directed), alpha 1, catalytic subunit	-1.439953619	0.029435091	0.073386196
5351	PLOD1	procollagen-lysine 1, 2-oxoglutarate 5-dioxygenase 1	-1.208596263	0.029780983	0.073810779
6120	rpe	rcRPE; ribulose-5-phosphate-3-epimerase	-1.308090111	0.029829399	0.07386981
3985	LIMK2	LIM domain kinase 2	4.586059744	0.029932215	0.073994847
23031	MAST3	microtubule associated serine/threonine kinase 3	-3.419940697	0.031091225	0.07537469
27005	USP21	ubiquitin specific peptidase 21	-1.545858536	0.031268971	0.075581601
4836	NMT1	N-myristoyltransferase 1	-1.538291654	0.031634178	0.076002916
23178	PASK	PAS domain containing serine/threonine kinase	-2.036359581	0.031738659	0.076122516
80824	DUSP16	dual specificity phosphatase 16	1.930353342	0.032304638	0.076763291
79087	Alg12	asparagine-linked glycosylation 12, alpha-1,6-mannosyltransferase homolog (S. cerevisiae)	-2.113364181	0.032462863	0.076940311
55217	TMLHE	trimethyllysine hydroxylase, epsilon	-2.116718354	0.032768256	0.077279412
2185	PTK2B	PTK2B protein tyrosine kinase 2 beta	1.732137273	0.032899489	0.0774241
518	ATP5G3	ATP synthase, H+ transporting, mitochondrial F0 complex, subunit C3 (subunit 9)	-1.533262891	0.033334519	0.077899368
9736	USP34	ubiquitin specific peptidase 34	-1.754861461	0.0336802	0.07827231
8702	b4galt4	UDP-Gal:betaGlcNAc beta 1,4- galactosyltransferase, polypeptide 4	1.261925095	0.033711118	0.078305465
55284	UBE2W	ubiquitin-conjugating enzyme E2W (putative)	-1.553972481	0.03378169	0.078381022
8569	mknk1	MAP kinase interacting serine/threonine kinase 1	-1.239594321	0.034078546	0.078696991
84340	GFM2	G elongation factor, mitochondrial 2	-1.278489966	0.034377941	0.079012659
23395	Lars2	leucyl-tRNA synthetase 2, mitochondrial	-1.484704339	0.035083891	0.079745282
2650	GCNT1	glucosaminyl (N-acetyl) transferase 1, core 2 (beta-1,6-N-acetylglucosaminyltransferase)	-1.804895325	0.035099997	0.079761808
5261	phkg2	phosphorylase kinase, gamma 2 (testis)	-1.539014808	0.035113255	0.079775405
54956	PARP16	poly (ADP-ribose) polymerase family, member 16	-1.23941095	0.035228887	0.079893759
6303	Sat1	spermidine/spermine N1-acetyltransferase 1	1.320878381	0.035497414	0.080166966
2585	Galk2	galactokinase 2	-1.475905709	0.036090085	0.080761976
2591	GALNT3	UDP-N-acetyl-alpha-D-galactosamine:polypeptide N-acetylgalactosaminyltransferase 3 (GalNAc-T3)	2.230769231	0.036288784	0.080959036
9101	usp8	ubiquitin specific peptidase 8	-1.239235551	0.036408687	0.08107737
3643	INSR	insulin receptor	-1.577184631	0.036615674	0.081280629
3551	IKBKB	inhibitor of kappa light polypeptide gene enhancer in B-cells, kinase beta	-1.270302429	0.036967861	0.081623537
5091	Pc	pyruvate carboxylase	-1.308967975	0.037447585	0.082084762
952	cd38	CD38 molecule	15.37990244	0.037491802	0.082126939
29110	Tbk1	TANK-binding kinase 1	1.504833542	0.037581464	0.082212291
4353	MPO	myeloperoxidase	1.387249115	0.03775931	0.082380908
2730	GCLM	glutamate-cysteine ligase, modifier subunit	2.376054029	0.038100803	0.08270217
8073	ptp4a2	protein tyrosine phosphatase type IVA, member 2	-1.413213947	0.038376561	0.08295921
126410	cyp4f22	cytochrome P450, family 4, subfamily F, polypeptide 22	1.805860806	0.038469714	0.083045565
54625	PARP14	poly (ADP-ribose) polymerase family, member 14	3.521971838	0.038507703	0.083080713
23228	PLCL2	phospholipase C-like 2	-1.461758115	0.039218341	0.083730978
6391	C1orf192	chromosome 1 open reading frame 192	-1.349126321	0.039999082	0.084429922
5589	prkcsh	protein kinase C substrate 80K-H	-1.218455744	0.040041433	0.084467383
219333	USP12	ubiquitin specific peptidase 12	3.511667178	0.040047238	0.084472514
51703	ACSL5	acyl-CoA synthetase long-chain family member 5	1.309798218	0.040066279	0.084489339
55326	AGPAT5	1-acylglycerol-3-phosphate O-acyltransferase 5 (lysophosphatidic acid acyltransferase, epsilon)	-1.445935711	0.040104937	0.084523469
132160	PPM1M	protein phosphatase 1M (PP2C domain containing)	-1.2527531	0.040236592	0.084639416
83931	Stk40	serine/threonine kinase 40	1.278941475	0.040324549	0.084716633
25	ABL1	c-abl oncogene 1, receptor tyrosine kinase	-1.313859485	0.040409645	0.084791152
11221	Dusp10	dual specificity phosphatase 10	-1.652098925	0.040578635	0.084938596
7465	wee1	WEE1 homolog (S. pombe)	-2.995461422	0.040714993	0.085057046
58508	MLL3	myeloid/lymphoid or mixed-lineage leukemia 3	-1.470495768	0.040784014	0.085116826
128	ADH5	alcohol dehydrogenase 5 (class III), chi polypeptide, pseudogene 4; alcohol dehydrogenase 5 (class III), chi polypeptide	-1.406194965	0.041128661	0.085413565
262	AMD1	adenosylmethionine decarboxylase 1	1.367342742	0.041175984	0.085454082
5164	PDK2	pyruvate dehydrogenase kinase, isozyme 2	-2.235294118	0.041471385	0.085705765
10905	MAN1A2	mannosidase, alpha, class 1A, member 2	-1.523289289	0.041980457	0.086134574
54961	Ssh3	slingshot homolog 3 (Drosophila)	-1.633211679	0.042516729	0.08657968
3176	HNMT	histamine N-methyltransferase	-2.300440827	0.042609053	0.086655635
51380	CSAD	cysteine sulfinic acid decarboxylase	-1.447049808	0.042760709	0.086779978
8648	NCOA1	nuclear receptor coactivator 1	1.246657742	0.04289385	0.086888708
984	Cdk11b	similar to cell division cycle 2-like 1 (PITSLRE proteins); cell division cycle 2-like 1 (PITSLRE proteins); cell division cycle 2-like 2 (PITSLRE proteins)	-1.295875641	0.043236755	0.087166892
221	Aldh3b1	aldehyde dehydrogenase 3 family, member B1	1.218949583	0.043787005	0.087607801
5255	PHKA1	phosphorylase kinase, alpha 1 pseudogene 1; phosphorylase kinase, alpha 1 (muscle)	-1.451309604	0.044103963	0.087858757
178	agl	amylo-1, 6-glucosidase, 4-alpha-glucanotransferase	-1.28694696	0.044420702	0.088107373
25778	DSTYK	dual serine/threonine and tyrosine protein kinase	2.031910804	0.044695978	0.088321704
57396	clk4	CDC-like kinase 4	1.311973419	0.044731706	0.088349405
64802	NMNAT1	nicotinamide nucleotide adenylyltransferase 1	-1.420729132	0.044863752	0.08845155
54704	Pdp1	pyruvate dehyrogenase phosphatase catalytic subunit 1	-1.817253155	0.044979199	0.088540555
3656	IRAK2	interleukin-1 receptor-associated kinase 2	3.849269393	0.045149153	0.088671078
6675	UAP1	UDP-N-acteylglucosamine pyrophosphorylase 1	1.319292474	0.045355347	0.08882863
6646	soat1	sterol O-acyltransferase 1	-1.26464768	0.045401159	0.088863516
5210	Pfkfb4	6-phosphofructo-2-kinase/fructose-2,6-biphosphatase 4	-2.243275793	0.045581495	0.089000426
272	AMPD3	adenosine monophosphate deaminase (isoform E)	2.223331806	0.045904123	0.089243716
79731	NARS2	asparaginyl-tRNA synthetase 2, mitochondrial (putative)	-1.560731663	0.046123668	0.089408075
8408	ULK1	unc-51-like kinase 1 (C. elegans)	-1.463320463	0.046277921	0.08952298
4820	NKTR	natural killer-tumor recognition sequence	-1.485592577	0.046541922	0.089718548
25930	Ptpn23	protein tyrosine phosphatase, non-receptor type 23	-1.503762424	0.046708657	0.089841358
158067	c9orf98	chromosome 9 open reading frame 98	1.715008147	0.046851475	0.089946123
1263	plk3	polo-like kinase 3 (Drosophila)	-1.470576046	0.046898829	0.089980772
10477	Ube2e3	ubiquitin-conjugating enzyme E2E 3 (UBC4/5 homolog, yeast)	-1.335031431	0.047054326	0.090094247
5728	PTENP1	phosphatase and tensin homolog; phosphatase and tensin homolog pseudogene 1	-1.284485343	0.047282841	0.090260166
2050	EPHB4	EPH receptor B4	-1.605315494	0.047391076	0.090338406
9448	MAP4K4	mitogen-activated protein kinase kinase kinase kinase 4	1.523995536	0.047778441	0.090616611
10000	Akt3	v-akt murine thymoma viral oncogene homolog 3 (protein kinase B, gamma)	1.623329703	0.047920358	0.090717833
64895	PAPOLG	poly(A) polymerase gamma	-1.999070488	0.048332267	0.091009519
5279	PIGC	phosphatidylinositol glycan anchor biosynthesis, class C	-1.823923783	0.048389485	0.091049791
5515	PPP2CA	protein phosphatase 2 (formerly 2A), catalytic subunit, alpha isoform	1.210009617	0.048485719	0.091117389
3055	HCK	hemopoietic cell kinase	1.778427905	0.048636527	0.091222985
85464	SSH2	slingshot homolog 2 (Drosophila)	-1.816235374	0.049359903	0.091723833
2047	ephb1	EPH receptor B1	-1.814989293	0.04938077	0.091738143
10797	mthfd2	methylenetetrahydrofolate dehydrogenase (NADP+ dependent) 2, methenyltetrahydrofolate cyclohydrolase	1.554809482	0.049397056	0.091749307
4707	NDUFB1	NADH dehydrogenase (ubiquinone) 1 beta subcomplex, 1, 7kDa	-1.345279826	0.049599691	0.091887819
1371	CPOX	coproporphyrinogen oxidase	-1.295133558	0.049640106	0.091915359
160851	DGKH	diacylglycerol kinase, eta	2.068367904	0.049845051	0.092054581
