# Supplementary material for: Transcriptional Profiling Suggests Extensive Metabolic Rewiring of Human and Mouse Macrophages during Early Interferon Alpha Responses
Source: Mediators Inflamm. 2018 Jul 25;2018:5906819. doi: 10.1155/2018/5906819 (PMC6083555; doi:10.1155/2018/5906819)
Supplement: Supplementary Table S4 — A list of significantly altered gene sets identified by GSEA in the MDM dataset. [file 5906819.f4.xlsx]

## Sheet: MDM_gsea_report_for_IFNa_149288
Filter	NAME	GS<br> follow link to MSigDB	GS DETAILS	SIZE	ES	NES	NOM p-val	FDR q-val	FWER p-val	RANK AT MAX	LEADING EDGE
1	KEGG_JAK_STAT_SIGNALING_PATHWAY	KEGG_JAK_STAT_SIGNALING_PATHWAY		105	-0.586815	-2.20588	0	1.8397e-05	0.009	1198	tags=33%, list=8%, signal=36%
2	GO_REGULATION_OF_INSULIN_RECEPTOR_SIGNALING_PATHWAY	GO_REGULATION_OF_INSULIN_RECEPTOR_SIGNALING_PATHWAY		27	-0.70668	-2.07548	0	0.000215931	0.13	1051	tags=37%, list=7%, signal=40%
3	GO_REGULATION_OF_REACTIVE_OXYGEN_SPECIES_BIOSYNTHETIC_PROCESS	GO_REGULATION_OF_REACTIVE_OXYGEN_SPECIES_BIOSYNTHETIC_PROCESS		54	-0.597194	-2.03864	0	0.000358176	0.218	1069	tags=26%, list=8%, signal=28%
4	GO_POSITIVE_REGULATION_OF_MAPK_CASCADE	GO_POSITIVE_REGULATION_OF_MAPK_CASCADE		300	-0.467152	-2.0182	0	0.000485902	0.292	1176	tags=20%, list=8%, signal=22%
5	GO_REGULATION_OF_NITRIC_OXIDE_BIOSYNTHETIC_PROCESS	GO_REGULATION_OF_NITRIC_OXIDE_BIOSYNTHETIC_PROCESS		42	-0.627816	-2.0042	0	0.000598593	0.359	1069	tags=31%, list=8%, signal=33%
6	GO_REGULATION_OF_REACTIVE_OXYGEN_SPECIES_METABOLIC_PROCESS	GO_REGULATION_OF_REACTIVE_OXYGEN_SPECIES_METABOLIC_PROCESS		113	-0.514071	-1.94966	0	0.00125481	0.641	1092	tags=22%, list=8%, signal=24%
7	GO_POSITIVE_REGULATION_OF_REACTIVE_OXYGEN_SPECIES_METABOLIC_PROCESS	GO_POSITIVE_REGULATION_OF_REACTIVE_OXYGEN_SPECIES_METABOLIC_PROCESS		67	-0.526916	-1.85748	0	0.00372431	0.97	1069	tags=25%, list=8%, signal=27%
8	GO_POSITIVE_REGULATION_OF_REACTIVE_OXYGEN_SPECIES_BIOSYNTHETIC_PROCESS	GO_POSITIVE_REGULATION_OF_REACTIVE_OXYGEN_SPECIES_BIOSYNTHETIC_PROCESS		40	-0.577732	-1.85006	0	0.00401796	0.98	1069	tags=28%, list=8%, signal=30%
9	GO_REGULATION_OF_MAPK_CASCADE	GO_REGULATION_OF_MAPK_CASCADE		437	-0.411073	-1.83829	0	0.00460273	0.992	1568	tags=21%, list=11%, signal=22%
10	GO_RNA_PHOSPHODIESTER_BOND_HYDROLYSIS_EXONUCLEOLYTIC	GO_RNA_PHOSPHODIESTER_BOND_HYDROLYSIS_EXONUCLEOLYTIC		26	-0.632398	-1.83478	0.00617284	0.00479298	0.995	162	tags=15%, list=1%, signal=16%
11	GO_POSITIVE_REGULATION_OF_MAP_KINASE_ACTIVITY	GO_POSITIVE_REGULATION_OF_MAP_KINASE_ACTIVITY		140	-0.450714	-1.75424	0	0.0104981	1	1606	tags=24%, list=11%, signal=27%
12	GO_REGULATION_OF_PHOSPHOLIPID_METABOLIC_PROCESS	GO_REGULATION_OF_PHOSPHOLIPID_METABOLIC_PROCESS		45	-0.532706	-1.74027	0.00420168	0.0119005	1	1051	tags=31%, list=7%, signal=33%
13	GO_REGULATION_OF_PHOSPHATIDYLINOSITOL_3_KINASE_ACTIVITY	GO_REGULATION_OF_PHOSPHATIDYLINOSITOL_3_KINASE_ACTIVITY		28	-0.58735	-1.71848	0.0103093	0.0144335	1	967	tags=39%, list=7%, signal=42%
14	GO_CELLULAR_RESPONSE_TO_GLUCOSE_STARVATION	GO_CELLULAR_RESPONSE_TO_GLUCOSE_STARVATION		25	-0.571466	-1.66368	0.0264317	0.0222244	1	2511	tags=48%, list=18%, signal=58%
15	GO_PROTEIN_POLYUBIQUITINATION	GO_PROTEIN_POLYUBIQUITINATION		209	-0.397229	-1.64286	0	0.0257801	1	2381	tags=28%, list=17%, signal=33%
16	GO_POSITIVE_REGULATION_OF_PHOSPHATIDYLINOSITOL_3_KINASE_SIGNALING	GO_POSITIVE_REGULATION_OF_PHOSPHATIDYLINOSITOL_3_KINASE_SIGNALING		41	-0.510667	-1.62349	0.00865801	0.0295772	1	937	tags=17%, list=7%, signal=18%
17	GO_POSITIVE_REGULATION_OF_PHOSPHOLIPID_METABOLIC_PROCESS	GO_POSITIVE_REGULATION_OF_PHOSPHOLIPID_METABOLIC_PROCESS		30	-0.53909	-1.60975	0.0220441	0.0323824	1	1051	tags=33%, list=7%, signal=36%
18	GO_REGULATION_OF_PHOSPHATIDYLINOSITOL_3_KINASE_SIGNALING	GO_REGULATION_OF_PHOSPHATIDYLINOSITOL_3_KINASE_SIGNALING		91	-0.437305	-1.60948	0.00398406	0.0324272	1	1094	tags=16%, list=8%, signal=18%
19	GO_POSITIVE_REGULATION_OF_MONOOXYGENASE_ACTIVITY	GO_POSITIVE_REGULATION_OF_MONOOXYGENASE_ACTIVITY		20	-0.584724	-1.57872	0.0286976	0.039768	1	1069	tags=25%, list=8%, signal=27%
20	GO_REGULATION_OF_MAP_KINASE_ACTIVITY	GO_REGULATION_OF_MAP_KINASE_ACTIVITY		227	-0.369096	-1.56015	0	0.0448687	1	1606	tags=21%, list=11%, signal=23%
21	GO_REGULATION_OF_STEROID_BIOSYNTHETIC_PROCESS	GO_REGULATION_OF_STEROID_BIOSYNTHETIC_PROCESS		28	-0.526627	-1.53159	0.0384615	0.0539552	1	1364	tags=25%, list=10%, signal=28%
22	GO_PURINE_NUCLEOBASE_METABOLIC_PROCESS	GO_PURINE_NUCLEOBASE_METABOLIC_PROCESS		20	-0.55767	-1.52716	0.0340909	0.0553456	1	197	tags=15%, list=1%, signal=15%
23	KEGG_NICOTINATE_AND_NICOTINAMIDE_METABOLISM	KEGG_NICOTINATE_AND_NICOTINAMIDE_METABOLISM		17	-0.576917	-1.52242	0.0426829	0.0567951	1	1901	tags=29%, list=13%, signal=34%
24	GO_POSITIVE_REGULATION_OF_STEROID_METABOLIC_PROCESS	GO_POSITIVE_REGULATION_OF_STEROID_METABOLIC_PROCESS		16	-0.573347	-1.50427	0.0688259	0.0631746	1	1824	tags=31%, list=13%, signal=36%
25	GO_UBIQUITIN_LIKE_PROTEIN_LIGASE_BINDING	GO_UBIQUITIN_LIKE_PROTEIN_LIGASE_BINDING		216	-0.361476	-1.49042	0.00167224	0.0685112	1	2277	tags=23%, list=16%, signal=27%
26	GO_TETRAHYDROFOLATE_METABOLIC_PROCESS	GO_TETRAHYDROFOLATE_METABOLIC_PROCESS		18	-0.554956	-1.48408	0.0465116	0.0710604	1	820	tags=11%, list=6%, signal=12%
27	GO_POLYUBIQUITIN_BINDING	GO_POLYUBIQUITIN_BINDING		32	-0.483349	-1.47217	0.045098	0.0760591	1	475	tags=16%, list=3%, signal=16%
28	KEGG_O_GLYCAN_BIOSYNTHESIS	KEGG_O_GLYCAN_BIOSYNTHESIS		20	-0.528233	-1.45067	0.0593047	0.0864434	1	2456	tags=40%, list=17%, signal=48%
29	GO_REGULATION_OF_MONOOXYGENASE_ACTIVITY	GO_REGULATION_OF_MONOOXYGENASE_ACTIVITY		47	-0.445473	-1.45042	0.0416667	0.0865148	1	1312	tags=17%, list=9%, signal=19%
30	GO_NEGATIVE_REGULATION_OF_REACTIVE_OXYGEN_SPECIES_METABOLIC_PROCESS	GO_NEGATIVE_REGULATION_OF_REACTIVE_OXYGEN_SPECIES_METABOLIC_PROCESS		30	-0.483	-1.43773	0.0454545	0.0930626	1	809	tags=17%, list=6%, signal=18%
31	GO_CELLULAR_RESPONSE_TO_FATTY_ACID	GO_CELLULAR_RESPONSE_TO_FATTY_ACID		38	-0.458506	-1.43385	0.056338	0.0950277	1	2618	tags=39%, list=18%, signal=48%
32	GO_NEGATIVE_REGULATION_OF_DNA_BIOSYNTHETIC_PROCESS	GO_NEGATIVE_REGULATION_OF_DNA_BIOSYNTHETIC_PROCESS		19	-0.5147	-1.42298	0.0886076	0.101125	1	166	tags=11%, list=1%, signal=11%
33	GO_RIBONUCLEOSIDE_CATABOLIC_PROCESS	GO_RIBONUCLEOSIDE_CATABOLIC_PROCESS		22	-0.513078	-1.40964	0.0786749	0.108793	1	583	tags=18%, list=4%, signal=19%
34	GO_UBIQUITIN_LIKE_PROTEIN_SPECIFIC_PROTEASE_ACTIVITY	GO_UBIQUITIN_LIKE_PROTEIN_SPECIFIC_PROTEASE_ACTIVITY		82	-0.370901	-1.38362	0.0466019	0.124368	1	1423	tags=16%, list=10%, signal=18%
35	GO_PYRIDINE_CONTAINING_COMPOUND_BIOSYNTHETIC_PROCESS	GO_PYRIDINE_CONTAINING_COMPOUND_BIOSYNTHETIC_PROCESS		15	-0.549376	-1.38335	0.116803	0.124494	1	1668	tags=27%, list=12%, signal=30%
36	KEGG_MAPK_SIGNALING_PATHWAY	KEGG_MAPK_SIGNALING_PATHWAY		198	-0.328463	-1.37584	0.0147601	0.129072	1	1052	tags=16%, list=7%, signal=17%
37	GO_FATTY_ACYL_COA_METABOLIC_PROCESS	GO_FATTY_ACYL_COA_METABOLIC_PROCESS		33	-0.452852	-1.3712	0.103659	0.13202	1	2005	tags=27%, list=14%, signal=32%
38	KEGG_TRYPTOPHAN_METABOLISM	KEGG_TRYPTOPHAN_METABOLISM		28	-0.462621	-1.36233	0.0918164	0.138044	1	1734	tags=29%, list=12%, signal=32%
39	GO_POSITIVE_REGULATION_OF_RELEASE_OF_CYTOCHROME_C_FROM_MITOCHONDRIA	GO_POSITIVE_REGULATION_OF_RELEASE_OF_CYTOCHROME_C_FROM_MITOCHONDRIA		22	-0.487493	-1.33388	0.120763	0.158163	1	1044	tags=18%, list=7%, signal=20%
40	GO_RNA_CATABOLIC_PROCESS	GO_RNA_CATABOLIC_PROCESS		194	-0.323052	-1.32675	0.0272109	0.164254	1	818	tags=7%, list=6%, signal=7%
41	GO_SPHINGOLIPID_BIOSYNTHETIC_PROCESS	GO_SPHINGOLIPID_BIOSYNTHETIC_PROCESS		42	-0.412273	-1.32546	0.0980769	0.165191	1	2446	tags=33%, list=17%, signal=40%
42	GO_POSITIVE_REGULATION_OF_PHOSPHOLIPASE_ACTIVITY	GO_POSITIVE_REGULATION_OF_PHOSPHOLIPASE_ACTIVITY		34	-0.428992	-1.30579	0.136	0.181268	1	2976	tags=47%, list=21%, signal=59%
43	GO_REGULATION_OF_STEROID_METABOLIC_PROCESS	GO_REGULATION_OF_STEROID_METABOLIC_PROCESS		42	-0.407482	-1.29453	0.122137	0.191306	1	1364	tags=19%, list=10%, signal=21%
44	GO_PYRIMIDINE_NUCLEOSIDE_CATABOLIC_PROCESS	GO_PYRIMIDINE_NUCLEOSIDE_CATABOLIC_PROCESS		17	-0.499761	-1.29035	0.191983	0.195385	1	583	tags=18%, list=4%, signal=18%
45	GO_PROTEIN_UBIQUITINATION	GO_PROTEIN_UBIQUITINATION		469	-0.287737	-1.2867	0.0229885	0.198528	1	1894	tags=17%, list=13%, signal=20%
46	GO_REGULATION_OF_PROTEIN_UBIQUITINATION_INVOLVED_IN_UBIQUITIN_DEPENDENT_PROTEIN_CATABOLIC_PROCESS	GO_REGULATION_OF_PROTEIN_UBIQUITINATION_INVOLVED_IN_UBIQUITIN_DEPENDENT_PROTEIN_CATABOLIC_PROCESS		91	-0.345084	-1.28338	0.0856574	0.20182	1	2197	tags=24%, list=15%, signal=28%
47	GO_REGULATION_OF_LIPID_METABOLIC_PROCESS	GO_REGULATION_OF_LIPID_METABOLIC_PROCESS		188	-0.31148	-1.27544	0.0560579	0.209136	1	1419	tags=18%, list=10%, signal=19%
48	GO_REGULATION_OF_OXIDOREDUCTASE_ACTIVITY	GO_REGULATION_OF_OXIDOREDUCTASE_ACTIVITY		62	-0.358919	-1.26931	0.114943	0.215048	1	1312	tags=15%, list=9%, signal=16%
49	GO_SULFUR_COMPOUND_BIOSYNTHETIC_PROCESS	GO_SULFUR_COMPOUND_BIOSYNTHETIC_PROCESS		143	-0.321005	-1.26654	0.0611511	0.217383	1	2155	tags=22%, list=15%, signal=25%
50	GO_LIPID_STORAGE	GO_LIPID_STORAGE		17	-0.483007	-1.25846	0.201258	0.225769	1	990	tags=18%, list=7%, signal=19%
51	KEGG_SPHINGOLIPID_METABOLISM	KEGG_SPHINGOLIPID_METABOLISM		23	-0.453026	-1.2553	0.163306	0.228933	1	2073	tags=30%, list=15%, signal=36%
52	GO_UBIQUITIN_LIKE_PROTEIN_BINDING	GO_UBIQUITIN_LIKE_PROTEIN_BINDING		91	-0.342768	-1.24751	0.092803	0.237021	1	1225	tags=15%, list=9%, signal=17%
53	GO_PHENOL_CONTAINING_COMPOUND_METABOLIC_PROCESS	GO_PHENOL_CONTAINING_COMPOUND_METABOLIC_PROCESS		38	-0.397837	-1.24236	0.15625	0.242677	1	1391	tags=13%, list=10%, signal=15%
54	NGUYEN_NOTCH1_TARGETS_DN	NGUYEN_NOTCH1_TARGETS_DN		74	-0.39817	-1.40115	0.0492091	0.113583	1	1884	tags=31%, list=13%, signal=36%
55	ALTEMEIER_RESPONSE_TO_LPS_WITH_MECHANICAL_VENTILATION	ALTEMEIER_RESPONSE_TO_LPS_WITH_MECHANICAL_VENTILATION		106	-0.781288	-2.94968	0	0	0	1433	tags=60%, list=10%, signal=67%
56	BASSO_CD40_SIGNALING_UP	BASSO_CD40_SIGNALING_UP		87	-0.703088	-2.57489	0	0	0	1703	tags=53%, list=12%, signal=60%
57	BENNETT_SYSTEMIC_LUPUS_ERYTHEMATOSUS	BENNETT_SYSTEMIC_LUPUS_ERYTHEMATOSUS		26	-0.920595	-2.63958	0	0	0	718	tags=73%, list=5%, signal=77%
58	BERTUCCI_MEDULLARY_VS_DUCTAL_BREAST_CANCER_UP	BERTUCCI_MEDULLARY_VS_DUCTAL_BREAST_CANCER_UP		156	-0.670723	-2.66941	0	0	0	1470	tags=33%, list=10%, signal=37%
59	BIOCARTA_INFLAM_PATHWAY	BIOCARTA_INFLAM_PATHWAY		19	-0.852448	-2.27288	0	0	0	1228	tags=63%, list=9%, signal=69%
60	BMI1_DN_MEL18_DN.V1_UP	BMI1_DN_MEL18_DN.V1_UP		105	-0.637108	-2.40689	0	0	0	1638	tags=41%, list=12%, signal=46%
61	BOSCO_INTERFERON_INDUCED_ANTIVIRAL_MODULE	BOSCO_INTERFERON_INDUCED_ANTIVIRAL_MODULE		63	-0.890013	-3.01172	0	0	0	719	tags=71%, list=5%, signal=75%
62	BOSCO_TH1_CYTOTOXIC_MODULE	BOSCO_TH1_CYTOTOXIC_MODULE		86	-0.754233	-2.73349	0	0	0	1098	tags=49%, list=8%, signal=53%
63	BOWIE_RESPONSE_TO_TAMOXIFEN	BOWIE_RESPONSE_TO_TAMOXIFEN		17	-0.903774	-2.36398	0	0	0	611	tags=88%, list=4%, signal=92%
64	BROWNE_HCMV_INFECTION_4HR_UP	BROWNE_HCMV_INFECTION_4HR_UP		37	-0.773912	-2.36968	0	0	0	1052	tags=46%, list=7%, signal=49%
65	BROWNE_INTERFERON_RESPONSIVE_GENES	BROWNE_INTERFERON_RESPONSIVE_GENES		61	-0.890711	-3.09894	0	0	0	687	tags=77%, list=5%, signal=81%
66	CHANG_IMMORTALIZED_BY_HPV31_DN	CHANG_IMMORTALIZED_BY_HPV31_DN		49	-0.719255	-2.3801	0	0	0	1056	tags=39%, list=7%, signal=42%
67	CHARAFE_BREAST_CANCER_LUMINAL_VS_BASAL_DN	CHARAFE_BREAST_CANCER_LUMINAL_VS_BASAL_DN		346	-0.569626	-2.48151	0	0	0	1108	tags=27%, list=8%, signal=28%
68	CREL_01	CREL_01		175	-0.58224	-2.35699	0	0	0	1001	tags=24%, list=7%, signal=26%
69	DAUER_STAT3_TARGETS_DN	DAUER_STAT3_TARGETS_DN		46	-0.8758	-2.8268	0	0	0	909	tags=76%, list=6%, signal=81%
70	DAUER_STAT3_TARGETS_UP	DAUER_STAT3_TARGETS_UP		35	-0.749824	-2.31756	0	0	0	1137	tags=49%, list=8%, signal=53%
71	DEBIASI_APOPTOSIS_BY_REOVIRUS_INFECTION_UP	DEBIASI_APOPTOSIS_BY_REOVIRUS_INFECTION_UP		259	-0.634731	-2.68842	0	0	0	1403	tags=34%, list=10%, signal=37%
72	DER_IFN_ALPHA_RESPONSE_UP	DER_IFN_ALPHA_RESPONSE_UP		66	-0.822047	-2.883	0	0	0	1522	tags=61%, list=11%, signal=68%
73	DER_IFN_BETA_RESPONSE_UP	DER_IFN_BETA_RESPONSE_UP		91	-0.735926	-2.72114	0	0	0	1339	tags=44%, list=9%, signal=48%
74	DER_IFN_GAMMA_RESPONSE_UP	DER_IFN_GAMMA_RESPONSE_UP		61	-0.767765	-2.61069	0	0	0	1765	tags=56%, list=12%, signal=63%
75	DIRMEIER_LMP1_RESPONSE_LATE_UP	DIRMEIER_LMP1_RESPONSE_LATE_UP		51	-0.78676	-2.62195	0	0	0	1058	tags=55%, list=7%, signal=59%
76	DUTTA_APOPTOSIS_VIA_NFKB	DUTTA_APOPTOSIS_VIA_NFKB		29	-0.824725	-2.45301	0	0	0	1261	tags=59%, list=9%, signal=64%
77	EGFR_UP.V1_UP	EGFR_UP.V1_UP		154	-0.596366	-2.36788	0	0	0	1387	tags=36%, list=10%, signal=39%
78	EINAV_INTERFERON_SIGNATURE_IN_CANCER	EINAV_INTERFERON_SIGNATURE_IN_CANCER		24	-0.846146	-2.38876	0	0	0	1339	tags=83%, list=9%, signal=92%
79	FARMER_BREAST_CANCER_CLUSTER_1	FARMER_BREAST_CANCER_CLUSTER_1		35	-0.827594	-2.5561	0	0	0	1433	tags=66%, list=10%, signal=73%
80	FOSTER_TOLERANT_MACROPHAGE_DN	FOSTER_TOLERANT_MACROPHAGE_DN		338	-0.667649	-2.90561	0	0	0	1558	tags=45%, list=11%, signal=49%
81	FULCHER_INFLAMMATORY_RESPONSE_LECTIN_VS_LPS_DN	FULCHER_INFLAMMATORY_RESPONSE_LECTIN_VS_LPS_DN		379	-0.600811	-2.64853	0	0	0	1148	tags=32%, list=8%, signal=34%
82	GALINDO_IMMUNE_RESPONSE_TO_ENTEROTOXIN	GALINDO_IMMUNE_RESPONSE_TO_ENTEROTOXIN		76	-0.715044	-2.56963	0	0	0	1454	tags=50%, list=10%, signal=55%
83	GAURNIER_PSMD4_TARGETS	GAURNIER_PSMD4_TARGETS		63	-0.718909	-2.48183	0	0	0	1194	tags=43%, list=8%, signal=47%
84	GEISS_RESPONSE_TO_DSRNA_UP	GEISS_RESPONSE_TO_DSRNA_UP		33	-0.811159	-2.43327	0	0	0	1135	tags=58%, list=8%, signal=62%
85	GHANDHI_BYSTANDER_IRRADIATION_UP	GHANDHI_BYSTANDER_IRRADIATION_UP		70	-0.737192	-2.6018	0	0	0	916	tags=54%, list=6%, signal=58%
86	GHANDHI_DIRECT_IRRADIATION_UP	GHANDHI_DIRECT_IRRADIATION_UP		77	-0.703271	-2.49675	0	0	0	1262	tags=49%, list=9%, signal=54%
87	GO_CCR_CHEMOKINE_RECEPTOR_BINDING	GO_CCR_CHEMOKINE_RECEPTOR_BINDING		19	-0.870975	-2.29921	0	0	0	640	tags=63%, list=5%, signal=66%
88	GO_CELLULAR_RESPONSE_TO_BIOTIC_STIMULUS	GO_CELLULAR_RESPONSE_TO_BIOTIC_STIMULUS		134	-0.587746	-2.30881	0	0	0	1104	tags=30%, list=8%, signal=32%
89	GO_CELLULAR_RESPONSE_TO_CYTOKINE_STIMULUS	GO_CELLULAR_RESPONSE_TO_CYTOKINE_STIMULUS		431	-0.651927	-2.90391	0	0	0	1305	tags=33%, list=9%, signal=36%
90	GO_CELLULAR_RESPONSE_TO_INTERFERON_GAMMA	GO_CELLULAR_RESPONSE_TO_INTERFERON_GAMMA		93	-0.783994	-2.93037	0	0	0	1189	tags=51%, list=8%, signal=55%
91	GO_CELLULAR_RESPONSE_TO_INTERLEUKIN_1	GO_CELLULAR_RESPONSE_TO_INTERLEUKIN_1		63	-0.678941	-2.35435	0	0	0	914	tags=38%, list=6%, signal=41%
92	GO_CHEMOKINE_ACTIVITY	GO_CHEMOKINE_ACTIVITY		28	-0.864441	-2.53895	0	0	0	1262	tags=71%, list=9%, signal=78%
93	GO_CHEMOKINE_MEDIATED_SIGNALING_PATHWAY	GO_CHEMOKINE_MEDIATED_SIGNALING_PATHWAY		38	-0.788249	-2.41775	0	0	0	640	tags=50%, list=5%, signal=52%
94	GO_CHEMOKINE_RECEPTOR_BINDING	GO_CHEMOKINE_RECEPTOR_BINDING		35	-0.842961	-2.64895	0	0	0	1262	tags=63%, list=9%, signal=69%
95	GO_CYTOKINE_ACTIVITY	GO_CYTOKINE_ACTIVITY		114	-0.716012	-2.74776	0	0	0	1303	tags=46%, list=9%, signal=50%
96	GO_CYTOKINE_MEDIATED_SIGNALING_PATHWAY	GO_CYTOKINE_MEDIATED_SIGNALING_PATHWAY		316	-0.696854	-3.02671	0	0	0	1228	tags=39%, list=9%, signal=41%
97	GO_CYTOKINE_RECEPTOR_BINDING	GO_CYTOKINE_RECEPTOR_BINDING		171	-0.62327	-2.5303	0	0	0	1566	tags=39%, list=11%, signal=43%
98	GO_DEFENSE_RESPONSE_TO_OTHER_ORGANISM	GO_DEFENSE_RESPONSE_TO_OTHER_ORGANISM		297	-0.61151	-2.64317	0	0	0	1607	tags=33%, list=11%, signal=36%
99	GO_DEFENSE_RESPONSE_TO_VIRUS	GO_DEFENSE_RESPONSE_TO_VIRUS		120	-0.75278	-2.93842	0	0	0	1483	tags=52%, list=10%, signal=58%
100	GO_EXTERNAL_SIDE_OF_PLASMA_MEMBRANE	GO_EXTERNAL_SIDE_OF_PLASMA_MEMBRANE		137	-0.614837	-2.40849	0	0	0	1087	tags=25%, list=8%, signal=27%
101	GO_G_PROTEIN_COUPLED_RECEPTOR_BINDING	GO_G_PROTEIN_COUPLED_RECEPTOR_BINDING		138	-0.591496	-2.30611	0	0	0	1262	tags=28%, list=9%, signal=30%
102	GO_I_KAPPAB_KINASE_NF_KAPPAB_SIGNALING	GO_I_KAPPAB_KINASE_NF_KAPPAB_SIGNALING		60	-0.678932	-2.31501	0	0	0	878	tags=33%, list=6%, signal=35%
103	GO_IMMUNE_EFFECTOR_PROCESS	GO_IMMUNE_EFFECTOR_PROCESS		336	-0.603168	-2.62921	0	0	0	1484	tags=33%, list=10%, signal=36%
104	GO_INFLAMMATORY_RESPONSE	GO_INFLAMMATORY_RESPONSE		291	-0.613827	-2.6162	0	0	0	1262	tags=32%, list=9%, signal=35%
105	GO_INNATE_IMMUNE_RESPONSE	GO_INNATE_IMMUNE_RESPONSE		388	-0.625557	-2.74827	0	0	0	1483	tags=32%, list=10%, signal=35%
106	GO_INTERFERON_GAMMA_MEDIATED_SIGNALING_PATHWAY	GO_INTERFERON_GAMMA_MEDIATED_SIGNALING_PATHWAY		62	-0.753792	-2.62973	0	0	0	1189	tags=48%, list=8%, signal=53%
107	GO_LYMPHOCYTE_CHEMOTAXIS	GO_LYMPHOCYTE_CHEMOTAXIS		22	-0.829518	-2.31987	0	0	0	640	tags=50%, list=5%, signal=52%
108	GO_LYMPHOCYTE_MIGRATION	GO_LYMPHOCYTE_MIGRATION		28	-0.809673	-2.41167	0	0	0	640	tags=46%, list=5%, signal=49%
109	GO_NEGATIVE_REGULATION_OF_DEFENSE_RESPONSE	GO_NEGATIVE_REGULATION_OF_DEFENSE_RESPONSE		105	-0.622519	-2.33328	0	0	0	1483	tags=28%, list=10%, signal=31%
110	GO_NEGATIVE_REGULATION_OF_EXTRINSIC_APOPTOTIC_SIGNALING_PATHWAY	GO_NEGATIVE_REGULATION_OF_EXTRINSIC_APOPTOTIC_SIGNALING_PATHWAY		76	-0.65295	-2.33426	0	0	0	1564	tags=41%, list=11%, signal=46%
111	GO_NEGATIVE_REGULATION_OF_MULTI_ORGANISM_PROCESS	GO_NEGATIVE_REGULATION_OF_MULTI_ORGANISM_PROCESS		106	-0.730395	-2.81357	0	0	0	1480	tags=43%, list=10%, signal=48%
112	GO_NEGATIVE_REGULATION_OF_TYPE_I_INTERFERON_PRODUCTION	GO_NEGATIVE_REGULATION_OF_TYPE_I_INTERFERON_PRODUCTION		31	-0.791421	-2.36284	0	0	0	871	tags=42%, list=6%, signal=45%
113	GO_NEGATIVE_REGULATION_OF_VIRAL_GENOME_REPLICATION	GO_NEGATIVE_REGULATION_OF_VIRAL_GENOME_REPLICATION		38	-0.826363	-2.58824	0	0	0	603	tags=55%, list=4%, signal=58%
114	GO_NEGATIVE_REGULATION_OF_VIRAL_PROCESS	GO_NEGATIVE_REGULATION_OF_VIRAL_PROCESS		67	-0.781121	-2.72482	0	0	0	611	tags=45%, list=4%, signal=47%
115	GO_POSITIVE_REGULATION_OF_CELL_ACTIVATION	GO_POSITIVE_REGULATION_OF_CELL_ACTIVATION		214	-0.562536	-2.34855	0	0	0	1189	tags=25%, list=8%, signal=27%
116	GO_POSITIVE_REGULATION_OF_CYTOKINE_BIOSYNTHETIC_PROCESS	GO_POSITIVE_REGULATION_OF_CYTOKINE_BIOSYNTHETIC_PROCESS		45	-0.737113	-2.42667	0	0	0	1565	tags=51%, list=11%, signal=57%
117	GO_POSITIVE_REGULATION_OF_CYTOKINE_PRODUCTION	GO_POSITIVE_REGULATION_OF_CYTOKINE_PRODUCTION		265	-0.593918	-2.50947	0	0	0	1146	tags=29%, list=8%, signal=31%
118	GO_POSITIVE_REGULATION_OF_DEFENSE_RESPONSE	GO_POSITIVE_REGULATION_OF_DEFENSE_RESPONSE		271	-0.591486	-2.51998	0	0	0	1104	tags=30%, list=8%, signal=31%
119	GO_POSITIVE_REGULATION_OF_EXTRINSIC_APOPTOTIC_SIGNALING_PATHWAY	GO_POSITIVE_REGULATION_OF_EXTRINSIC_APOPTOTIC_SIGNALING_PATHWAY		45	-0.720458	-2.31151	0	0	0	892	tags=29%, list=6%, signal=31%
120	GO_POSITIVE_REGULATION_OF_I_KAPPAB_KINASE_NF_KAPPAB_SIGNALING	GO_POSITIVE_REGULATION_OF_I_KAPPAB_KINASE_NF_KAPPAB_SIGNALING		144	-0.628211	-2.48598	0	0	0	1599	tags=34%, list=11%, signal=38%
121	GO_POSITIVE_REGULATION_OF_IMMUNE_RESPONSE	GO_POSITIVE_REGULATION_OF_IMMUNE_RESPONSE		404	-0.517711	-2.30555	0	0	0	1620	tags=27%, list=11%, signal=29%
122	GO_POSITIVE_REGULATION_OF_INFLAMMATORY_RESPONSE	GO_POSITIVE_REGULATION_OF_INFLAMMATORY_RESPONSE		71	-0.705448	-2.46189	0	0	0	1104	tags=39%, list=8%, signal=43%
123	GO_POSITIVE_REGULATION_OF_INNATE_IMMUNE_RESPONSE	GO_POSITIVE_REGULATION_OF_INNATE_IMMUNE_RESPONSE		203	-0.582359	-2.40644	0	0	0	1104	tags=29%, list=8%, signal=31%
124	GO_POSITIVE_REGULATION_OF_INTERFERON_GAMMA_PRODUCTION	GO_POSITIVE_REGULATION_OF_INTERFERON_GAMMA_PRODUCTION		46	-0.715432	-2.30065	0	0	0	1104	tags=41%, list=8%, signal=45%
125	GO_POSITIVE_REGULATION_OF_LEUKOCYTE_CHEMOTAXIS	GO_POSITIVE_REGULATION_OF_LEUKOCYTE_CHEMOTAXIS		57	-0.707419	-2.38548	0	0	0	1563	tags=44%, list=11%, signal=49%
126	GO_POSITIVE_REGULATION_OF_LEUKOCYTE_MIGRATION	GO_POSITIVE_REGULATION_OF_LEUKOCYTE_MIGRATION		75	-0.715561	-2.54855	0	0	0	1563	tags=45%, list=11%, signal=51%
127	GO_POSITIVE_REGULATION_OF_LEUKOCYTE_PROLIFERATION	GO_POSITIVE_REGULATION_OF_LEUKOCYTE_PROLIFERATION		98	-0.649778	-2.41162	0	0	0	1285	tags=35%, list=9%, signal=38%
128	GO_POSITIVE_REGULATION_OF_NF_KAPPAB_TRANSCRIPTION_FACTOR_ACTIVITY	GO_POSITIVE_REGULATION_OF_NF_KAPPAB_TRANSCRIPTION_FACTOR_ACTIVITY		102	-0.643406	-2.41849	0	0	0	887	tags=27%, list=6%, signal=29%
129	GO_POSITIVE_REGULATION_OF_RESPONSE_TO_WOUNDING	GO_POSITIVE_REGULATION_OF_RESPONSE_TO_WOUNDING		103	-0.631323	-2.38972	0	0	0	1104	tags=32%, list=8%, signal=34%
130	GO_POSITIVE_REGULATION_OF_STAT_CASCADE	GO_POSITIVE_REGULATION_OF_STAT_CASCADE		49	-0.678852	-2.27136	0	0	0	1240	tags=45%, list=9%, signal=49%
131	GO_REGULATION_OF_CHEMOTAXIS	GO_REGULATION_OF_CHEMOTAXIS		121	-0.596783	-2.31001	0	0	0	2227	tags=40%, list=16%, signal=48%
132	GO_REGULATION_OF_CYTOKINE_BIOSYNTHETIC_PROCESS	GO_REGULATION_OF_CYTOKINE_BIOSYNTHETIC_PROCESS		71	-0.665045	-2.34092	0	0	0	1615	tags=44%, list=11%, signal=49%
133	GO_REGULATION_OF_CYTOKINE_PRODUCTION	GO_REGULATION_OF_CYTOKINE_PRODUCTION		398	-0.570483	-2.51306	0	0	0	1196	tags=27%, list=8%, signal=28%
134	GO_REGULATION_OF_EXTRINSIC_APOPTOTIC_SIGNALING_PATHWAY	GO_REGULATION_OF_EXTRINSIC_APOPTOTIC_SIGNALING_PATHWAY		122	-0.642167	-2.49712	0	0	0	1564	tags=35%, list=11%, signal=39%
135	GO_REGULATION_OF_EXTRINSIC_APOPTOTIC_SIGNALING_PATHWAY_IN_ABSENCE_OF_LIGAND	GO_REGULATION_OF_EXTRINSIC_APOPTOTIC_SIGNALING_PATHWAY_IN_ABSENCE_OF_LIGAND		35	-0.764735	-2.37583	0	0	0	1450	tags=40%, list=10%, signal=44%
136	GO_REGULATION_OF_GRANULOCYTE_CHEMOTAXIS	GO_REGULATION_OF_GRANULOCYTE_CHEMOTAXIS		28	-0.775881	-2.28715	0	0	0	547	tags=36%, list=4%, signal=37%
137	GO_REGULATION_OF_I_KAPPAB_KINASE_NF_KAPPAB_SIGNALING	GO_REGULATION_OF_I_KAPPAB_KINASE_NF_KAPPAB_SIGNALING		188	-0.621294	-2.56316	0	0	0	1599	tags=34%, list=11%, signal=37%
138	GO_REGULATION_OF_IMMUNE_EFFECTOR_PROCESS	GO_REGULATION_OF_IMMUNE_EFFECTOR_PROCESS		294	-0.532478	-2.28675	0	0	0	1176	tags=22%, list=8%, signal=23%
139	GO_REGULATION_OF_INFLAMMATORY_RESPONSE	GO_REGULATION_OF_INFLAMMATORY_RESPONSE		192	-0.623744	-2.56153	0	0	0	1104	tags=27%, list=8%, signal=29%
140	GO_REGULATION_OF_INNATE_IMMUNE_RESPONSE	GO_REGULATION_OF_INNATE_IMMUNE_RESPONSE		280	-0.601466	-2.56827	0	0	0	1135	tags=29%, list=8%, signal=31%
141	GO_REGULATION_OF_INTERFERON_GAMMA_PRODUCTION	GO_REGULATION_OF_INTERFERON_GAMMA_PRODUCTION		68	-0.701519	-2.48589	0	0	0	878	tags=35%, list=6%, signal=37%
142	GO_REGULATION_OF_INTERLEUKIN_1_BETA_PRODUCTION	GO_REGULATION_OF_INTERLEUKIN_1_BETA_PRODUCTION		30	-0.758939	-2.28001	0	0	0	1096	tags=47%, list=8%, signal=50%
143	GO_REGULATION_OF_INTERLEUKIN_1_PRODUCTION	GO_REGULATION_OF_INTERLEUKIN_1_PRODUCTION		38	-0.757914	-2.38706	0	0	0	1096	tags=45%, list=8%, signal=48%
144	GO_REGULATION_OF_INTERLEUKIN_12_PRODUCTION	GO_REGULATION_OF_INTERLEUKIN_12_PRODUCTION		41	-0.757902	-2.4037	0	0	0	1104	tags=46%, list=8%, signal=50%
145	GO_REGULATION_OF_LEUKOCYTE_CHEMOTAXIS	GO_REGULATION_OF_LEUKOCYTE_CHEMOTAXIS		70	-0.691147	-2.43005	0	0	0	1566	tags=40%, list=11%, signal=45%
146	GO_REGULATION_OF_LEUKOCYTE_MIGRATION	GO_REGULATION_OF_LEUKOCYTE_MIGRATION		107	-0.658401	-2.51339	0	0	0	1566	tags=37%, list=11%, signal=42%
147	GO_REGULATION_OF_LEUKOCYTE_PROLIFERATION	GO_REGULATION_OF_LEUKOCYTE_PROLIFERATION		148	-0.581076	-2.31735	0	0	0	1285	tags=28%, list=9%, signal=30%
148	GO_REGULATION_OF_MULTI_ORGANISM_PROCESS	GO_REGULATION_OF_MULTI_ORGANISM_PROCESS		343	-0.544171	-2.36257	0	0	0	1177	tags=22%, list=8%, signal=23%
149	GO_REGULATION_OF_NECROTIC_CELL_DEATH	GO_REGULATION_OF_NECROTIC_CELL_DEATH		22	-0.825678	-2.30139	0	0	0	914	tags=32%, list=6%, signal=34%
150	GO_REGULATION_OF_NF_KAPPAB_IMPORT_INTO_NUCLEUS	GO_REGULATION_OF_NF_KAPPAB_IMPORT_INTO_NUCLEUS		41	-0.754549	-2.39724	0	0	0	1104	tags=44%, list=8%, signal=47%
151	GO_REGULATION_OF_RESPONSE_TO_CYTOKINE_STIMULUS	GO_REGULATION_OF_RESPONSE_TO_CYTOKINE_STIMULUS		112	-0.622704	-2.3475	0	0	0	1275	tags=30%, list=9%, signal=33%
152	GO_REGULATION_OF_RESPONSE_TO_WOUNDING	GO_REGULATION_OF_RESPONSE_TO_WOUNDING		262	-0.568459	-2.40042	0	0	0	1104	tags=24%, list=8%, signal=26%
153	GO_REGULATION_OF_SYMBIOSIS_ENCOMPASSING_MUTUALISM_THROUGH_PARASITISM	GO_REGULATION_OF_SYMBIOSIS_ENCOMPASSING_MUTUALISM_THROUGH_PARASITISM		168	-0.644878	-2.60272	0	0	0	1177	tags=29%, list=8%, signal=31%
154	GO_REGULATION_OF_T_CELL_DIFFERENTIATION	GO_REGULATION_OF_T_CELL_DIFFERENTIATION		74	-0.658884	-2.35564	0	0	0	1127	tags=39%, list=8%, signal=42%
155	GO_REGULATION_OF_T_CELL_PROLIFERATION	GO_REGULATION_OF_T_CELL_PROLIFERATION		105	-0.59507	-2.27489	0	0	0	1833	tags=32%, list=13%, signal=37%
156	GO_REGULATION_OF_T_HELPER_CELL_DIFFERENTIATION	GO_REGULATION_OF_T_HELPER_CELL_DIFFERENTIATION		20	-0.828503	-2.27657	0	0	0	1127	tags=60%, list=8%, signal=65%
157	GO_REGULATION_OF_TYPE_I_INTERFERON_PRODUCTION	GO_REGULATION_OF_TYPE_I_INTERFERON_PRODUCTION		95	-0.641141	-2.39477	0	0	0	871	tags=32%, list=6%, signal=33%
158	GO_REGULATION_OF_VIRAL_GENOME_REPLICATION	GO_REGULATION_OF_VIRAL_GENOME_REPLICATION		63	-0.737926	-2.5448	0	0	0	1480	tags=49%, list=10%, signal=55%
159	GO_RESPONSE_TO_BACTERIUM	GO_RESPONSE_TO_BACTERIUM		330	-0.574059	-2.52255	0	0	0	1565	tags=32%, list=11%, signal=35%
160	GO_RESPONSE_TO_INTERFERON_GAMMA	GO_RESPONSE_TO_INTERFERON_GAMMA		109	-0.780523	-2.93429	0	0	0	1189	tags=50%, list=8%, signal=54%
161	GO_RESPONSE_TO_INTERLEUKIN_1	GO_RESPONSE_TO_INTERLEUKIN_1		86	-0.663059	-2.41385	0	0	0	914	tags=36%, list=6%, signal=38%
162	GO_RESPONSE_TO_MOLECULE_OF_BACTERIAL_ORIGIN	GO_RESPONSE_TO_MOLECULE_OF_BACTERIAL_ORIGIN		243	-0.589098	-2.48606	0	0	0	1208	tags=32%, list=9%, signal=34%
163	GO_RESPONSE_TO_TUMOR_NECROSIS_FACTOR	GO_RESPONSE_TO_TUMOR_NECROSIS_FACTOR		172	-0.650928	-2.65581	0	0	0	1043	tags=30%, list=7%, signal=32%
164	GO_RESPONSE_TO_TYPE_I_INTERFERON	GO_RESPONSE_TO_TYPE_I_INTERFERON		53	-0.792547	-2.60502	0	0	0	1339	tags=64%, list=9%, signal=71%
165	GO_RESPONSE_TO_VIRUS	GO_RESPONSE_TO_VIRUS		186	-0.698414	-2.85618	0	0	0	1483	tags=42%, list=10%, signal=46%
166	GO_TUMOR_NECROSIS_FACTOR_MEDIATED_SIGNALING_PATHWAY	GO_TUMOR_NECROSIS_FACTOR_MEDIATED_SIGNALING_PATHWAY		93	-0.642738	-2.33196	0	0	0	1540	tags=32%, list=11%, signal=36%
167	GRAESSMANN_APOPTOSIS_BY_SERUM_DEPRIVATION_UP	GRAESSMANN_APOPTOSIS_BY_SERUM_DEPRIVATION_UP		363	-0.533337	-2.34366	0	0	0	1558	tags=26%, list=11%, signal=28%
168	GRAESSMANN_RESPONSE_TO_MC_AND_SERUM_DEPRIVATION_UP	GRAESSMANN_RESPONSE_TO_MC_AND_SERUM_DEPRIVATION_UP		136	-0.691924	-2.70469	0	0	0	1402	tags=40%, list=10%, signal=44%
169	GRAHAM_CML_DIVIDING_VS_NORMAL_QUIESCENT_DN	GRAHAM_CML_DIVIDING_VS_NORMAL_QUIESCENT_DN		79	-0.712405	-2.5585	0	0	0	1309	tags=39%, list=9%, signal=43%
170	GRAHAM_CML_QUIESCENT_VS_NORMAL_DIVIDING_UP	GRAHAM_CML_QUIESCENT_VS_NORMAL_DIVIDING_UP		51	-0.78966	-2.64896	0	0	0	1505	tags=57%, list=11%, signal=63%
171	GRAHAM_NORMAL_QUIESCENT_VS_NORMAL_DIVIDING_UP	GRAHAM_NORMAL_QUIESCENT_VS_NORMAL_DIVIDING_UP		55	-0.751709	-2.51425	0	0	0	850	tags=42%, list=6%, signal=44%
172	HALLMARK_ALLOGRAFT_REJECTION	HALLMARK_ALLOGRAFT_REJECTION		162	-0.637226	-2.55796	0	0	0	1307	tags=36%, list=9%, signal=39%
173	HALLMARK_COMPLEMENT	HALLMARK_COMPLEMENT		166	-0.616728	-2.45068	0	0	0	1433	tags=28%, list=10%, signal=31%
174	HALLMARK_IL2_STAT5_SIGNALING	HALLMARK_IL2_STAT5_SIGNALING		160	-0.57292	-2.28522	0	0	0	1228	tags=29%, list=9%, signal=32%
175	HALLMARK_IL6_JAK_STAT3_SIGNALING	HALLMARK_IL6_JAK_STAT3_SIGNALING		73	-0.760892	-2.73356	0	0	0	1078	tags=47%, list=8%, signal=50%
176	HALLMARK_INFLAMMATORY_RESPONSE	HALLMARK_INFLAMMATORY_RESPONSE		167	-0.764752	-3.08971	0	0	0	1346	tags=56%, list=9%, signal=61%
177	HALLMARK_INTERFERON_ALPHA_RESPONSE	HALLMARK_INTERFERON_ALPHA_RESPONSE		87	-0.889436	-3.20929	0	0	0	1228	tags=84%, list=9%, signal=91%
178	HALLMARK_INTERFERON_GAMMA_RESPONSE	HALLMARK_INTERFERON_GAMMA_RESPONSE	Details ...	182	-0.86442	-3.54965	0	0	0	1189	tags=69%, list=8%, signal=74%
179	HALLMARK_TNFA_SIGNALING_VIA_NFKB	HALLMARK_TNFA_SIGNALING_VIA_NFKB		181	-0.729143	-2.96653	0	0	0	1387	tags=67%, list=10%, signal=73%
180	HECKER_IFNB1_TARGETS	HECKER_IFNB1_TARGETS		75	-0.834952	-2.94454	0	0	0	718	tags=59%, list=5%, signal=61%
181	HELLEBREKERS_SILENCED_DURING_TUMOR_ANGIOGENESIS	HELLEBREKERS_SILENCED_DURING_TUMOR_ANGIOGENESIS		56	-0.698736	-2.37814	0	0	0	631	tags=25%, list=4%, signal=26%
182	HELLER_SILENCED_BY_METHYLATION_UP	HELLER_SILENCED_BY_METHYLATION_UP		212	-0.683609	-2.84185	0	0	0	1098	tags=35%, list=8%, signal=37%
183	HINATA_NFKB_IMMU_INF	HINATA_NFKB_IMMU_INF		17	-0.905786	-2.36233	0	0	0	1195	tags=94%, list=8%, signal=103%
184	HINATA_NFKB_TARGETS_FIBROBLAST_UP	HINATA_NFKB_TARGETS_FIBROBLAST_UP		69	-0.757404	-2.66443	0	0	0	1286	tags=49%, list=9%, signal=54%
185	HINATA_NFKB_TARGETS_KERATINOCYTE_UP	HINATA_NFKB_TARGETS_KERATINOCYTE_UP		78	-0.796464	-2.86709	0	0	0	1261	tags=60%, list=9%, signal=66%
186	HIRSCH_CELLULAR_TRANSFORMATION_SIGNATURE_UP	HIRSCH_CELLULAR_TRANSFORMATION_SIGNATURE_UP		203	-0.559086	-2.30308	0	0	0	1390	tags=32%, list=10%, signal=35%
187	ICHIBA_GRAFT_VERSUS_HOST_DISEASE_D7_UP	ICHIBA_GRAFT_VERSUS_HOST_DISEASE_D7_UP		91	-0.774704	-2.84662	0	0	0	1189	tags=45%, list=8%, signal=49%
188	ISRE_01	ISRE_01		164	-0.592166	-2.38491	0	0	0	1339	tags=32%, list=9%, signal=35%
189	JACKSON_DNMT1_TARGETS_UP	JACKSON_DNMT1_TARGETS_UP		66	-0.681368	-2.38377	0	0	0	1387	tags=36%, list=10%, signal=40%
190	JISON_SICKLE_CELL_DISEASE_UP	JISON_SICKLE_CELL_DISEASE_UP		158	-0.621133	-2.45901	0	0	0	1046	tags=28%, list=7%, signal=30%
191	KEGG_APOPTOSIS	KEGG_APOPTOSIS		75	-0.65956	-2.34762	0	0	0	878	tags=36%, list=6%, signal=38%
192	KEGG_CYTOKINE_CYTOKINE_RECEPTOR_INTERACTION	KEGG_CYTOKINE_CYTOKINE_RECEPTOR_INTERACTION		155	-0.697267	-2.7641	0	0	0	1262	tags=43%, list=9%, signal=46%
193	KEGG_CYTOSOLIC_DNA_SENSING_PATHWAY	KEGG_CYTOSOLIC_DNA_SENSING_PATHWAY		40	-0.742491	-2.37916	0	0	0	1188	tags=52%, list=8%, signal=57%
194	KEGG_NOD_LIKE_RECEPTOR_SIGNALING_PATHWAY	KEGG_NOD_LIKE_RECEPTOR_SIGNALING_PATHWAY		45	-0.762094	-2.49478	0	0	0	1096	tags=44%, list=8%, signal=48%
195	KEGG_RIG_I_LIKE_RECEPTOR_SIGNALING_PATHWAY	KEGG_RIG_I_LIKE_RECEPTOR_SIGNALING_PATHWAY		49	-0.756986	-2.49406	0	0	0	1104	tags=45%, list=8%, signal=49%
196	KEGG_TOLL_LIKE_RECEPTOR_SIGNALING_PATHWAY	KEGG_TOLL_LIKE_RECEPTOR_SIGNALING_PATHWAY		84	-0.624856	-2.28108	0	0	0	1104	tags=33%, list=8%, signal=36%
197	KIM_GLIS2_TARGETS_UP	KIM_GLIS2_TARGETS_UP		60	-0.670905	-2.32554	0	0	0	1189	tags=30%, list=8%, signal=33%
198	KIM_LRRC3B_TARGETS	KIM_LRRC3B_TARGETS		28	-0.843453	-2.46646	0	0	0	657	tags=39%, list=5%, signal=41%
199	KRASNOSELSKAYA_ILF3_TARGETS_UP	KRASNOSELSKAYA_ILF3_TARGETS_UP		32	-0.794731	-2.40192	0	0	0	611	tags=50%, list=4%, signal=52%
200	KUROZUMI_RESPONSE_TO_ONCOCYTIC_VIRUS	KUROZUMI_RESPONSE_TO_ONCOCYTIC_VIRUS		32	-0.80179	-2.42039	0	0	0	1096	tags=53%, list=8%, signal=57%
201	LIANG_SILENCED_BY_METHYLATION_2	LIANG_SILENCED_BY_METHYLATION_2		38	-0.860514	-2.72158	0	0	0	631	tags=63%, list=4%, signal=66%
202	LINDSTEDT_DENDRITIC_CELL_MATURATION_A	LINDSTEDT_DENDRITIC_CELL_MATURATION_A		63	-0.868852	-2.97773	0	0	0	1104	tags=71%, list=8%, signal=77%
203	LINDSTEDT_DENDRITIC_CELL_MATURATION_B	LINDSTEDT_DENDRITIC_CELL_MATURATION_B		50	-0.866212	-2.86908	0	0	0	657	tags=72%, list=5%, signal=75%
204	LTE2_UP.V1_DN	LTE2_UP.V1_DN		153	-0.639163	-2.54621	0	0	0	1400	tags=39%, list=10%, signal=42%
205	MAHADEVAN_RESPONSE_TO_MP470_UP	MAHADEVAN_RESPONSE_TO_MP470_UP		18	-0.898629	-2.38798	0	0	0	598	tags=72%, list=4%, signal=75%
206	MAHAJAN_RESPONSE_TO_IL1A_UP	MAHAJAN_RESPONSE_TO_IL1A_UP		66	-0.725149	-2.51653	0	0	0	940	tags=45%, list=7%, signal=48%
207	MARKEY_RB1_ACUTE_LOF_DN	MARKEY_RB1_ACUTE_LOF_DN		183	-0.617261	-2.50171	0	0	0	1135	tags=26%, list=8%, signal=28%
208	MCLACHLAN_DENTAL_CARIES_UP	MCLACHLAN_DENTAL_CARIES_UP		209	-0.590304	-2.46052	0	0	0	1454	tags=30%, list=10%, signal=33%
209	MISSIAGLIA_REGULATED_BY_METHYLATION_UP	MISSIAGLIA_REGULATED_BY_METHYLATION_UP		93	-0.722107	-2.62616	0	0	0	903	tags=34%, list=6%, signal=37%
210	MOSERLE_IFNA_RESPONSE	MOSERLE_IFNA_RESPONSE		28	-0.958907	-2.83729	0	0	0	611	tags=100%, list=4%, signal=104%
211	NABA_SECRETED_FACTORS	NABA_SECRETED_FACTORS		147	-0.644086	-2.55081	0	0	0	1361	tags=36%, list=10%, signal=39%
212	NEMETH_INFLAMMATORY_RESPONSE_LPS_UP	NEMETH_INFLAMMATORY_RESPONSE_LPS_UP		81	-0.689844	-2.50297	0	0	0	1565	tags=52%, list=11%, signal=58%
213	NFKAPPAB_01	NFKAPPAB_01		166	-0.632	-2.56873	0	0	0	1610	tags=34%, list=11%, signal=38%
214	NFKAPPAB65_01	NFKAPPAB65_01		160	-0.591078	-2.4069	0	0	0	1001	tags=25%, list=7%, signal=27%
215	NFKB_Q6_01	NFKB_Q6_01		157	-0.632238	-2.49728	0	0	0	1440	tags=32%, list=10%, signal=35%
216	OKUMURA_INFLAMMATORY_RESPONSE_LPS	OKUMURA_INFLAMMATORY_RESPONSE_LPS		144	-0.600956	-2.37554	0	0	0	1427	tags=33%, list=10%, signal=37%
217	PHONG_TNF_RESPONSE_NOT_VIA_P38	PHONG_TNF_RESPONSE_NOT_VIA_P38		281	-0.630017	-2.69946	0	0	0	1278	tags=35%, list=9%, signal=37%
218	PHONG_TNF_RESPONSE_VIA_P38_PARTIAL	PHONG_TNF_RESPONSE_VIA_P38_PARTIAL		135	-0.604564	-2.39446	0	0	0	1387	tags=44%, list=10%, signal=49%
219	PHONG_TNF_TARGETS_UP	PHONG_TNF_TARGETS_UP		56	-0.679066	-2.3021	0	0	0	1114	tags=59%, list=8%, signal=64%
220	PID_IL12_2PATHWAY	PID_IL12_2PATHWAY		51	-0.744953	-2.46568	0	0	0	1564	tags=53%, list=11%, signal=59%
221	PID_IL23_PATHWAY	PID_IL23_PATHWAY		31	-0.830741	-2.47447	0	0	0	1161	tags=71%, list=8%, signal=77%
222	PID_IL27_PATHWAY	PID_IL27_PATHWAY		24	-0.856877	-2.37253	0	0	0	1147	tags=71%, list=8%, signal=77%
223	QI_PLASMACYTOMA_UP	QI_PLASMACYTOMA_UP		208	-0.581682	-2.42603	0	0	0	1221	tags=30%, list=9%, signal=32%
224	RADAEVA_RESPONSE_TO_IFNA1_UP	RADAEVA_RESPONSE_TO_IFNA1_UP		49	-0.829222	-2.70995	0	0	0	757	tags=57%, list=5%, signal=60%
225	RASHI_NFKB1_TARGETS	RASHI_NFKB1_TARGETS		17	-0.889281	-2.31567	0	0	0	1228	tags=76%, list=9%, signal=84%
226	RASHI_RESPONSE_TO_IONIZING_RADIATION_2	RASHI_RESPONSE_TO_IONIZING_RADIATION_2		101	-0.673718	-2.54949	0	0	0	1228	tags=40%, list=9%, signal=43%
227	REACTOME_CHEMOKINE_RECEPTORS_BIND_CHEMOKINES	REACTOME_CHEMOKINE_RECEPTORS_BIND_CHEMOKINES		32	-0.784402	-2.41336	0	0	0	1262	tags=53%, list=9%, signal=58%
228	REACTOME_CYTOKINE_SIGNALING_IN_IMMUNE_SYSTEM	REACTOME_CYTOKINE_SIGNALING_IN_IMMUNE_SYSTEM		222	-0.691095	-2.88224	0	0	0	1225	tags=41%, list=9%, signal=44%
229	REACTOME_INTERFERON_ALPHA_BETA_SIGNALING	REACTOME_INTERFERON_ALPHA_BETA_SIGNALING		49	-0.815732	-2.70745	0	0	0	1145	tags=67%, list=8%, signal=73%
230	REACTOME_INTERFERON_GAMMA_SIGNALING	REACTOME_INTERFERON_GAMMA_SIGNALING		52	-0.819148	-2.69593	0	0	0	1189	tags=58%, list=8%, signal=63%
231	REACTOME_INTERFERON_SIGNALING	REACTOME_INTERFERON_SIGNALING		130	-0.722453	-2.79017	0	0	0	1225	tags=44%, list=9%, signal=48%
232	REACTOME_PEPTIDE_LIGAND_BINDING_RECEPTORS	REACTOME_PEPTIDE_LIGAND_BINDING_RECEPTORS		69	-0.654692	-2.29184	0	0	0	1262	tags=29%, list=9%, signal=32%
233	REACTOME_RIG_I_MDA5_MEDIATED_INDUCTION_OF_IFN_ALPHA_BETA_PATHWAYS	REACTOME_RIG_I_MDA5_MEDIATED_INDUCTION_OF_IFN_ALPHA_BETA_PATHWAYS		51	-0.765886	-2.56788	0	0	0	984	tags=43%, list=7%, signal=46%
234	REACTOME_SIGNALING_BY_ILS	REACTOME_SIGNALING_BY_ILS		92	-0.662445	-2.45585	0	0	0	1099	tags=37%, list=8%, signal=40%
235	RUTELLA_RESPONSE_TO_CSF2RB_AND_IL4_UP	RUTELLA_RESPONSE_TO_CSF2RB_AND_IL4_UP		298	-0.608146	-2.62134	0	0	0	1114	tags=29%, list=8%, signal=30%
236	RUTELLA_RESPONSE_TO_HGF_UP	RUTELLA_RESPONSE_TO_HGF_UP		364	-0.569575	-2.5051	0	0	0	1099	tags=24%, list=8%, signal=26%
237	RUTELLA_RESPONSE_TO_HGF_VS_CSF2RB_AND_IL4_DN	RUTELLA_RESPONSE_TO_HGF_VS_CSF2RB_AND_IL4_DN		210	-0.605841	-2.51806	0	0	0	1250	tags=31%, list=9%, signal=33%
238	SANA_RESPONSE_TO_IFNG_UP	SANA_RESPONSE_TO_IFNG_UP		57	-0.836679	-2.84603	0	0	0	1189	tags=58%, list=8%, signal=63%
239	SANA_TNF_SIGNALING_UP	SANA_TNF_SIGNALING_UP		68	-0.828771	-2.91106	0	0	0	1384	tags=66%, list=10%, signal=73%
240	SEITZ_NEOPLASTIC_TRANSFORMATION_BY_8P_DELETION_UP	SEITZ_NEOPLASTIC_TRANSFORMATION_BY_8P_DELETION_UP		58	-0.80346	-2.77033	0	0	0	809	tags=48%, list=6%, signal=51%
241	SEKI_INFLAMMATORY_RESPONSE_LPS_UP	SEKI_INFLAMMATORY_RESPONSE_LPS_UP		68	-0.744731	-2.63682	0	0	0	1228	tags=65%, list=9%, signal=70%
242	SMID_BREAST_CANCER_LUMINAL_B_DN	SMID_BREAST_CANCER_LUMINAL_B_DN		353	-0.567562	-2.50712	0	0	0	1512	tags=27%, list=11%, signal=30%
243	STAMBOLSKY_TARGETS_OF_MUTATED_TP53_DN	STAMBOLSKY_TARGETS_OF_MUTATED_TP53_DN		38	-0.731926	-2.30801	0	0	0	611	tags=45%, list=4%, signal=47%
244	TAKEDA_TARGETS_OF_NUP98_HOXA9_FUSION_10D_UP	TAKEDA_TARGETS_OF_NUP98_HOXA9_FUSION_10D_UP		132	-0.751329	-2.93505	0	0	0	1093	tags=37%, list=8%, signal=40%
245	TAKEDA_TARGETS_OF_NUP98_HOXA9_FUSION_16D_UP	TAKEDA_TARGETS_OF_NUP98_HOXA9_FUSION_16D_UP		129	-0.663986	-2.56107	0	0	0	1121	tags=31%, list=8%, signal=33%
246	TAKEDA_TARGETS_OF_NUP98_HOXA9_FUSION_3D_UP	TAKEDA_TARGETS_OF_NUP98_HOXA9_FUSION_3D_UP		128	-0.759957	-2.9072	0	0	0	784	tags=46%, list=6%, signal=48%
247	TAKEDA_TARGETS_OF_NUP98_HOXA9_FUSION_8D_UP	TAKEDA_TARGETS_OF_NUP98_HOXA9_FUSION_8D_UP		107	-0.708441	-2.68854	0	0	0	1063	tags=42%, list=7%, signal=45%
248	TIAN_TNF_SIGNALING_VIA_NFKB	TIAN_TNF_SIGNALING_VIA_NFKB		27	-0.914949	-2.62528	0	0	0	796	tags=85%, list=6%, signal=90%
249	UROSEVIC_RESPONSE_TO_IMIQUIMOD	UROSEVIC_RESPONSE_TO_IMIQUIMOD		22	-0.883941	-2.46853	0	0	0	631	tags=77%, list=4%, signal=81%
250	VERHAAK_AML_WITH_NPM1_MUTATED_UP	VERHAAK_AML_WITH_NPM1_MUTATED_UP		155	-0.624325	-2.47077	0	0	0	1606	tags=33%, list=11%, signal=37%
251	WALLACE_PROSTATE_CANCER_RACE_UP	WALLACE_PROSTATE_CANCER_RACE_UP		228	-0.623515	-2.59093	0	0	0	1305	tags=33%, list=9%, signal=36%
252	WIELAND_UP_BY_HBV_INFECTION	WIELAND_UP_BY_HBV_INFECTION		92	-0.656559	-2.4042	0	0	0	1165	tags=30%, list=8%, signal=33%
253	WORSCHECH_TUMOR_EVASION_AND_TOLEROGENICITY_UP	WORSCHECH_TUMOR_EVASION_AND_TOLEROGENICITY_UP		20	-0.829657	-2.28616	0	0	0	1433	tags=65%, list=10%, signal=72%
254	WORSCHECH_TUMOR_REJECTION_UP	WORSCHECH_TUMOR_REJECTION_UP		43	-0.830771	-2.67699	0	0	0	1145	tags=58%, list=8%, signal=63%
255	XU_AKT1_TARGETS_6HR	XU_AKT1_TARGETS_6HR		24	-0.853913	-2.42713	0	0	0	679	tags=46%, list=5%, signal=48%
256	YAATNANRNNNCAG_UNKNOWN	YAATNANRNNNCAG_UNKNOWN		93	-0.628329	-2.3557	0	0	0	688	tags=26%, list=5%, signal=27%
257	YAN_ESCAPE_FROM_ANOIKIS	YAN_ESCAPE_FROM_ANOIKIS		19	-0.905149	-2.42572	0	0	0	847	tags=74%, list=6%, signal=78%
258	ZHAN_MULTIPLE_MYELOMA_LB_DN	ZHAN_MULTIPLE_MYELOMA_LB_DN		32	-0.768093	-2.36509	0	0	0	718	tags=47%, list=5%, signal=49%
259	ZHANG_ANTIVIRAL_RESPONSE_TO_RIBAVIRIN_UP	ZHANG_ANTIVIRAL_RESPONSE_TO_RIBAVIRIN_UP		24	-0.815152	-2.33247	0	0	0	651	tags=42%, list=5%, signal=44%
260	ZHANG_INTERFERON_RESPONSE	ZHANG_INTERFERON_RESPONSE		21	-0.92145	-2.51943	0	0	0	611	tags=86%, list=4%, signal=89%
261	ZHANG_RESPONSE_TO_IKK_INHIBITOR_AND_TNF_UP	ZHANG_RESPONSE_TO_IKK_INHIBITOR_AND_TNF_UP		174	-0.813118	-3.28627	0	0	0	1285	tags=64%, list=9%, signal=69%
262	ZHOU_INFLAMMATORY_RESPONSE_FIMA_UP	ZHOU_INFLAMMATORY_RESPONSE_FIMA_UP		300	-0.695406	-3.01875	0	0	0	1337	tags=42%, list=9%, signal=45%
263	ZHOU_INFLAMMATORY_RESPONSE_LIVE_UP	ZHOU_INFLAMMATORY_RESPONSE_LIVE_UP		306	-0.714983	-3.08273	0	0	0	1337	tags=48%, list=9%, signal=52%
264	ZHOU_INFLAMMATORY_RESPONSE_LPS_UP	ZHOU_INFLAMMATORY_RESPONSE_LPS_UP		251	-0.77478	-3.24058	0	0	0	1337	tags=55%, list=9%, signal=59%
265	ZHU_CMV_24_HR_UP	ZHU_CMV_24_HR_UP		81	-0.675004	-2.43556	0	0	0	1305	tags=35%, list=9%, signal=38%
266	ZHU_CMV_8_HR_UP	ZHU_CMV_8_HR_UP		43	-0.798653	-2.57122	0	0	0	1305	tags=77%, list=9%, signal=84%
267	ZHU_CMV_ALL_UP	ZHU_CMV_ALL_UP		105	-0.745838	-2.78393	0	0	0	1305	tags=46%, list=9%, signal=50%
268	ICSBP_Q6	ICSBP_Q6		170	-0.555485	-2.24147	0	2.19106e-06	0.001	1836	tags=33%, list=13%, signal=37%
269	GO_REGULATION_OF_CYTOKINE_SECRETION	GO_REGULATION_OF_CYTOKINE_SECRETION		100	-0.598587	-2.24364	0	2.19477e-06	0.001	1096	tags=32%, list=8%, signal=34%
270	FOSTER_TOLERANT_MACROPHAGE_UP	FOSTER_TOLERANT_MACROPHAGE_UP		116	-0.587654	-2.24531	0	2.20222e-06	0.001	1688	tags=36%, list=12%, signal=41%
271	VART_KSHV_INFECTION_ANGIOGENIC_MARKERS_UP	VART_KSHV_INFECTION_ANGIOGENIC_MARKERS_UP		103	-0.593073	-2.24532	0	2.20597e-06	0.001	1559	tags=34%, list=11%, signal=38%
272	JOHNSTONE_PARVB_TARGETS_2_UP	JOHNSTONE_PARVB_TARGETS_2_UP		122	-0.584554	-2.24541	0	2.20972e-06	0.001	1466	tags=23%, list=10%, signal=25%
273	NABA_MATRISOME_ASSOCIATED	NABA_MATRISOME_ASSOCIATED		358	-0.508148	-2.24591	0	2.2135e-06	0.001	2379	tags=32%, list=17%, signal=38%
274	GO_POSITIVE_REGULATION_OF_SEQUENCE_SPECIFIC_DNA_BINDING_TRANSCRIPTION_FACTOR_ACTIVITY	GO_POSITIVE_REGULATION_OF_SEQUENCE_SPECIFIC_DNA_BINDING_TRANSCRIPTION_FACTOR_ACTIVITY		167	-0.557857	-2.24614	0	2.21728e-06	0.001	887	tags=22%, list=6%, signal=23%
275	NAKAYAMA_SOFT_TISSUE_TUMORS_PCA1_UP	NAKAYAMA_SOFT_TISSUE_TUMORS_PCA1_UP		65	-0.639782	-2.24985	0	2.23254e-06	0.001	1078	tags=22%, list=8%, signal=23%
276	SHIN_B_CELL_LYMPHOMA_CLUSTER_8	SHIN_B_CELL_LYMPHOMA_CLUSTER_8		32	-0.747008	-2.25039	0	2.24026e-06	0.001	1021	tags=41%, list=7%, signal=44%
277	GO_REGULATION_OF_ADAPTIVE_IMMUNE_RESPONSE	GO_REGULATION_OF_ADAPTIVE_IMMUNE_RESPONSE		91	-0.609866	-2.25081	0	2.24413e-06	0.001	1380	tags=31%, list=10%, signal=34%
278	SESTO_RESPONSE_TO_UV_C1	SESTO_RESPONSE_TO_UV_C1		52	-0.672822	-2.25227	0	2.25977e-06	0.001	2007	tags=37%, list=14%, signal=42%
279	GO_REGULATION_OF_LYMPHOCYTE_DIFFERENTIATION	GO_REGULATION_OF_LYMPHOCYTE_DIFFERENTIATION		94	-0.60822	-2.2523	0	2.26371e-06	0.001	1127	tags=33%, list=8%, signal=36%
280	TTCYNRGAA_STAT5B_01	TTCYNRGAA_STAT5B_01		132	-0.577593	-2.25251	0	2.26767e-06	0.001	1695	tags=33%, list=12%, signal=38%
281	GO_ACTIVATION_OF_INNATE_IMMUNE_RESPONSE	GO_ACTIVATION_OF_INNATE_IMMUNE_RESPONSE		173	-0.560088	-2.25532	0	2.27963e-06	0.001	1051	tags=26%, list=7%, signal=28%
282	GO_POSITIVE_REGULATION_OF_INTERLEUKIN_12_PRODUCTION	GO_POSITIVE_REGULATION_OF_INTERLEUKIN_12_PRODUCTION		26	-0.771273	-2.25959	0	2.28767e-06	0.001	1104	tags=50%, list=8%, signal=54%
283	KRIEG_HYPOXIA_VIA_KDM3A	KRIEG_HYPOXIA_VIA_KDM3A		42	-0.702313	-2.2599	0	2.29171e-06	0.001	1514	tags=48%, list=11%, signal=53%
284	GO_MONOCYTE_CHEMOTAXIS	GO_MONOCYTE_CHEMOTAXIS		25	-0.795686	-2.26095	0	2.30392e-06	0.001	937	tags=52%, list=7%, signal=56%
285	SATO_SILENCED_BY_METHYLATION_IN_PANCREATIC_CANCER_1	SATO_SILENCED_BY_METHYLATION_IN_PANCREATIC_CANCER_1		270	-0.529071	-2.26359	0	2.30802e-06	0.001	1596	tags=26%, list=11%, signal=29%
286	GO_RESPONSE_TO_PROTOZOAN	GO_RESPONSE_TO_PROTOZOAN		18	-0.866216	-2.26366	0	2.31214e-06	0.001	1104	tags=61%, list=8%, signal=66%
287	HAN_JNK_SINGALING_UP	HAN_JNK_SINGALING_UP		28	-0.764139	-2.26623	0	2.32041e-06	0.001	1550	tags=50%, list=11%, signal=56%
288	GO_POSITIVE_REGULATION_OF_CHEMOTAXIS	GO_POSITIVE_REGULATION_OF_CHEMOTAXIS		82	-0.631739	-2.26634	0	2.32457e-06	0.001	1563	tags=34%, list=11%, signal=38%
289	IRF7_01	IRF7_01		161	-0.567416	-2.26641	0	2.32874e-06	0.001	1653	tags=34%, list=12%, signal=38%
290	GO_POSITIVE_REGULATION_OF_RESPONSE_TO_EXTERNAL_STIMULUS	GO_POSITIVE_REGULATION_OF_RESPONSE_TO_EXTERNAL_STIMULUS		196	-0.552456	-2.26747	0	2.33293e-06	0.001	1303	tags=27%, list=9%, signal=29%
291	GO_NEGATIVE_REGULATION_OF_SIGNAL_TRANSDUCTION_IN_ABSENCE_OF_LIGAND	GO_NEGATIVE_REGULATION_OF_SIGNAL_TRANSDUCTION_IN_ABSENCE_OF_LIGAND		21	-0.846715	-2.26784	0	2.33713e-06	0.001	1450	tags=57%, list=10%, signal=64%
292	GO_REGULATION_OF_NEUTROPHIL_CHEMOTAXIS	GO_REGULATION_OF_NEUTROPHIL_CHEMOTAXIS		22	-0.798818	-2.26861	0	2.34135e-06	0.001	477	tags=36%, list=3%, signal=38%
293	WINZEN_DEGRADED_VIA_KHSRP	WINZEN_DEGRADED_VIA_KHSRP		79	-0.620908	-2.23495	0	4.28799e-06	0.002	959	tags=34%, list=7%, signal=36%
294	PID_HIV_NEF_PATHWAY	PID_HIV_NEF_PATHWAY		34	-0.720648	-2.23559	0	4.29512e-06	0.002	951	tags=50%, list=7%, signal=53%
295	GRAHAM_CML_QUIESCENT_VS_CML_DIVIDING_UP	GRAHAM_CML_QUIESCENT_VS_CML_DIVIDING_UP		21	-0.814454	-2.23581	0	4.30228e-06	0.002	1262	tags=67%, list=9%, signal=73%
296	GO_REGULATION_OF_GLYCOPROTEIN_METABOLIC_PROCESS	GO_REGULATION_OF_GLYCOPROTEIN_METABOLIC_PROCESS		32	-0.724617	-2.23688	0	4.3239e-06	0.002	538	tags=25%, list=4%, signal=26%
297	ONDER_CDH1_TARGETS_2_DN	ONDER_CDH1_TARGETS_2_DN		293	-0.520589	-2.23795	0	4.33116e-06	0.002	1515	tags=28%, list=11%, signal=30%
298	IRF_Q6	IRF_Q6		169	-0.554623	-2.23803	0	4.33844e-06	0.002	1604	tags=30%, list=11%, signal=34%
299	PEDRIOLI_MIR31_TARGETS_DN	PEDRIOLI_MIR31_TARGETS_DN		244	-0.525484	-2.22959	0	6.36802e-06	0.003	1213	tags=21%, list=9%, signal=22%
300	GO_POSITIVE_REGULATION_OF_PEPTIDYL_TYROSINE_PHOSPHORYLATION	GO_POSITIVE_REGULATION_OF_PEPTIDYL_TYROSINE_PHOSPHORYLATION		105	-0.58311	-2.23058	0	6.389e-06	0.003	1240	tags=30%, list=9%, signal=32%
301	KRAS.KIDNEY_UP.V1_DN	KRAS.KIDNEY_UP.V1_DN		64	-0.640398	-2.23112	0	6.41012e-06	0.003	702	tags=28%, list=5%, signal=29%
302	GO_EXTRINSIC_APOPTOTIC_SIGNALING_PATHWAY	GO_EXTRINSIC_APOPTOTIC_SIGNALING_PATHWAY		81	-0.617641	-2.23305	0	6.42073e-06	0.003	1564	tags=41%, list=11%, signal=46%
303	BOWIE_RESPONSE_TO_EXTRACELLULAR_MATRIX	BOWIE_RESPONSE_TO_EXTRACELLULAR_MATRIX		17	-0.858424	-2.2205	0	1.04487e-05	0.005	939	tags=82%, list=7%, signal=88%
304	GO_REGULATION_OF_CYSTEINE_TYPE_ENDOPEPTIDASE_ACTIVITY	GO_REGULATION_OF_CYSTEINE_TYPE_ENDOPEPTIDASE_ACTIVITY		160	-0.554627	-2.22279	0	1.05335e-05	0.005	1208	tags=25%, list=9%, signal=27%
305	GO_REGULATION_OF_PEPTIDYL_TYROSINE_PHOSPHORYLATION	GO_REGULATION_OF_PEPTIDYL_TYROSINE_PHOSPHORYLATION		147	-0.562236	-2.22491	0	1.05506e-05	0.005	1240	tags=27%, list=9%, signal=29%
306	HALMOS_CEBPA_TARGETS_UP	HALMOS_CEBPA_TARGETS_UP		42	-0.694927	-2.22725	0	1.05678e-05	0.005	1514	tags=43%, list=11%, signal=48%
307	GO_REGULATION_OF_CELL_CELL_ADHESION	GO_REGULATION_OF_CELL_CELL_ADHESION		264	-0.520427	-2.22738	0	1.05851e-05	0.005	1189	tags=23%, list=8%, signal=25%
308	BIOCARTA_DEATH_PATHWAY	BIOCARTA_DEATH_PATHWAY		30	-0.748328	-2.22742	0	1.06024e-05	0.005	757	tags=47%, list=5%, signal=49%
309	REACTOME_NEGATIVE_REGULATORS_OF_RIG_I_MDA5_SIGNALING	REACTOME_NEGATIVE_REGULATORS_OF_RIG_I_MDA5_SIGNALING		25	-0.779797	-2.21696	0	1.24312e-05	0.006	925	tags=40%, list=7%, signal=43%
310	GO_POSITIVE_REGULATION_OF_CELL_CELL_ADHESION	GO_POSITIVE_REGULATION_OF_CELL_CELL_ADHESION		173	-0.55127	-2.21701	0	1.2451e-05	0.006	1189	tags=25%, list=8%, signal=27%
311	REACTOME_INNATE_IMMUNE_SYSTEM	REACTOME_INNATE_IMMUNE_SYSTEM		171	-0.5446	-2.21812	0	1.24909e-05	0.006	1198	tags=26%, list=8%, signal=28%
312	GO_RESPONSE_TO_INTERFERON_BETA	GO_RESPONSE_TO_INTERFERON_BETA		17	-0.850861	-2.21387	0	1.64816e-05	0.008	634	tags=53%, list=4%, signal=55%
313	HORIUCHI_WTAP_TARGETS_UP	HORIUCHI_WTAP_TARGETS_UP		235	-0.523171	-2.1953	0	1.80552e-05	0.009	1713	tags=29%, list=12%, signal=33%
314	GO_REGULATION_OF_INTERFERON_BETA_PRODUCTION	GO_REGULATION_OF_INTERFERON_BETA_PRODUCTION		38	-0.689822	-2.19537	0	1.80832e-05	0.009	871	tags=39%, list=6%, signal=42%
315	NABA_MATRISOME	NABA_MATRISOME		471	-0.488411	-2.19549	0	1.81113e-05	0.009	2467	tags=31%, list=17%, signal=37%
316	LINDSTEDT_DENDRITIC_CELL_MATURATION_C	LINDSTEDT_DENDRITIC_CELL_MATURATION_C		55	-0.648709	-2.20129	0	1.8253e-05	0.009	1290	tags=36%, list=9%, signal=40%
317	WIERENGA_STAT5A_TARGETS_UP	WIERENGA_STAT5A_TARGETS_UP		144	-0.559882	-2.20399	0	1.82816e-05	0.009	1264	tags=33%, list=9%, signal=36%
318	KEGG_CHEMOKINE_SIGNALING_PATHWAY	KEGG_CHEMOKINE_SIGNALING_PATHWAY		137	-0.563214	-2.20418	0	1.83103e-05	0.009	1312	tags=30%, list=9%, signal=33%
319	GO_POSITIVE_REGULATION_OF_IMMUNE_EFFECTOR_PROCESS	GO_POSITIVE_REGULATION_OF_IMMUNE_EFFECTOR_PROCESS		106	-0.584875	-2.20496	0	1.83391e-05	0.009	1147	tags=26%, list=8%, signal=29%
320	GNF2_MMP1	GNF2_MMP1		25	-0.778252	-2.20542	0	1.8368e-05	0.009	1262	tags=48%, list=9%, signal=53%
321	BIOCARTA_IL22BP_PATHWAY	BIOCARTA_IL22BP_PATHWAY		15	-0.887413	-2.21159	0	1.85138e-05	0.009	1099	tags=67%, list=8%, signal=72%
322	P53_DN.V2_UP	P53_DN.V2_UP		85	-0.602149	-2.18785	0	2.17089e-05	0.011	1428	tags=29%, list=10%, signal=33%
323	ZWANG_CLASS_3_TRANSIENTLY_INDUCED_BY_EGF	ZWANG_CLASS_3_TRANSIENTLY_INDUCED_BY_EGF		166	-0.548629	-2.18911	0	2.17752e-05	0.011	1884	tags=43%, list=13%, signal=49%
324	WUNDER_INFLAMMATORY_RESPONSE_AND_CHOLESTEROL_UP	WUNDER_INFLAMMATORY_RESPONSE_AND_CHOLESTEROL_UP		46	-0.676542	-2.19044	0	2.18419e-05	0.011	1339	tags=37%, list=9%, signal=41%
325	GO_REGULATION_OF_LYMPHOCYTE_APOPTOTIC_PROCESS	GO_REGULATION_OF_LYMPHOCYTE_APOPTOTIC_PROCESS		40	-0.688279	-2.19143	0	2.18754e-05	0.011	1044	tags=28%, list=7%, signal=30%
326	CASTELLANO_NRAS_TARGETS_UP	CASTELLANO_NRAS_TARGETS_UP		52	-0.647997	-2.19257	0	2.1909e-05	0.011	1046	tags=23%, list=7%, signal=25%
327	GO_REGULATION_OF_CELL_ACTIVATION	GO_REGULATION_OF_CELL_ACTIVATION		333	-0.50202	-2.19278	0	2.19427e-05	0.011	1189	tags=22%, list=8%, signal=23%
328	GO_REGULATION_OF_TYROSINE_PHOSPHORYLATION_OF_STAT_PROTEIN	GO_REGULATION_OF_TYROSINE_PHOSPHORYLATION_OF_STAT_PROTEIN		46	-0.668692	-2.19329	0	2.19765e-05	0.011	1240	tags=41%, list=9%, signal=45%
329	DASU_IL6_SIGNALING_UP	DASU_IL6_SIGNALING_UP		52	-0.656157	-2.18288	0	2.55164e-05	0.013	718	tags=25%, list=5%, signal=26%
330	GO_POSITIVE_REGULATION_OF_T_CELL_PROLIFERATION	GO_POSITIVE_REGULATION_OF_T_CELL_PROLIFERATION		69	-0.625188	-2.18458	0	2.55938e-05	0.013	1104	tags=29%, list=8%, signal=31%
331	VILIMAS_NOTCH1_TARGETS_UP	VILIMAS_NOTCH1_TARGETS_UP		42	-0.681115	-2.1814	0	2.74372e-05	0.014	1387	tags=55%, list=10%, signal=61%
332	FRIDMAN_SENESCENCE_UP	FRIDMAN_SENESCENCE_UP		62	-0.623467	-2.1734	0	3.07119e-05	0.016	1092	tags=27%, list=8%, signal=30%
333	BROWNE_HCMV_INFECTION_6HR_UP	BROWNE_HCMV_INFECTION_6HR_UP		44	-0.673702	-2.17345	0	3.07575e-05	0.016	1305	tags=34%, list=9%, signal=37%
334	BMI1_DN.V1_UP	BMI1_DN.V1_UP		108	-0.572946	-2.17493	0	3.08032e-05	0.016	1566	tags=29%, list=11%, signal=32%
335	NEWMAN_ERCC6_TARGETS_UP	NEWMAN_ERCC6_TARGETS_UP		22	-0.785165	-2.17565	0	3.0895e-05	0.016	1795	tags=64%, list=13%, signal=73%
336	GO_REGULATION_OF_PEPTIDASE_ACTIVITY	GO_REGULATION_OF_PEPTIDASE_ACTIVITY		247	-0.511882	-2.17625	0	3.10803e-05	0.016	1721	tags=26%, list=12%, signal=29%
337	GO_REGULATION_OF_HOMOTYPIC_CELL_CELL_ADHESION	GO_REGULATION_OF_HOMOTYPIC_CELL_CELL_ADHESION		216	-0.523801	-2.17632	0	3.1127e-05	0.016	1189	tags=24%, list=8%, signal=25%
338	GO_POSITIVE_REGULATION_OF_INTERLEUKIN_6_PRODUCTION	GO_POSITIVE_REGULATION_OF_INTERLEUKIN_6_PRODUCTION		48	-0.67202	-2.17161	0	3.24743e-05	0.017	1069	tags=33%, list=8%, signal=36%
339	LU_IL4_SIGNALING	LU_IL4_SIGNALING		72	-0.618088	-2.17209	0	3.25704e-05	0.017	1249	tags=35%, list=9%, signal=38%
340	GO_POSITIVE_REGULATION_OF_NEUTROPHIL_MIGRATION	GO_POSITIVE_REGULATION_OF_NEUTROPHIL_MIGRATION		21	-0.790261	-2.16345	0	3.35279e-05	0.018	809	tags=43%, list=6%, signal=45%
341	LEE_LIVER_CANCER_MYC_E2F1_UP	LEE_LIVER_CANCER_MYC_E2F1_UP		45	-0.667667	-2.16379	0	3.35762e-05	0.018	1439	tags=27%, list=10%, signal=30%
342	GO_GRANULOCYTE_MIGRATION	GO_GRANULOCYTE_MIGRATION		51	-0.63279	-2.16479	0	3.3722e-05	0.018	640	tags=27%, list=5%, signal=29%
343	GO_REGULATION_OF_VIRAL_ENTRY_INTO_HOST_CELL	GO_REGULATION_OF_VIRAL_ENTRY_INTO_HOST_CELL		22	-0.792359	-2.16481	0	3.37708e-05	0.018	525	tags=41%, list=4%, signal=42%
344	GO_REGULATION_OF_NEUTROPHIL_MIGRATION	GO_REGULATION_OF_NEUTROPHIL_MIGRATION		25	-0.766894	-2.16551	0	3.3869e-05	0.018	809	tags=36%, list=6%, signal=38%
345	GO_REGULATION_OF_EXTRINSIC_APOPTOTIC_SIGNALING_PATHWAY_VIA_DEATH_DOMAIN_RECEPTORS	GO_REGULATION_OF_EXTRINSIC_APOPTOTIC_SIGNALING_PATHWAY_VIA_DEATH_DOMAIN_RECEPTORS		45	-0.666469	-2.16574	0	3.39183e-05	0.018	1707	tags=40%, list=12%, signal=45%
346	GO_REGULATION_OF_CD4_POSITIVE_ALPHA_BETA_T_CELL_ACTIVATION	GO_REGULATION_OF_CD4_POSITIVE_ALPHA_BETA_T_CELL_ACTIVATION		29	-0.744438	-2.16578	0	3.39677e-05	0.018	1127	tags=48%, list=8%, signal=52%
347	GO_POSITIVE_REGULATION_OF_ERK1_AND_ERK2_CASCADE	GO_POSITIVE_REGULATION_OF_ERK1_AND_ERK2_CASCADE		100	-0.578616	-2.16667	0	3.40671e-05	0.018	878	tags=26%, list=6%, signal=28%
348	ONO_AML1_TARGETS_DN	ONO_AML1_TARGETS_DN		33	-0.712856	-2.16243	0	3.52416e-05	0.019	1058	tags=45%, list=7%, signal=49%
349	GO_RESPONSE_TO_EXOGENOUS_DSRNA	GO_RESPONSE_TO_EXOGENOUS_DSRNA		26	-0.759198	-2.15806	0	3.67391e-05	0.02	1124	tags=42%, list=8%, signal=46%
350	KANG_GIST_WITH_PDGFRA_UP	KANG_GIST_WITH_PDGFRA_UP		31	-0.718167	-2.15874	0	3.67913e-05	0.02	1433	tags=42%, list=10%, signal=47%
351	GO_PATTERN_RECOGNITION_RECEPTOR_SIGNALING_PATHWAY	GO_PATTERN_RECOGNITION_RECEPTOR_SIGNALING_PATHWAY		91	-0.583508	-2.15974	0	3.68436e-05	0.02	990	tags=27%, list=7%, signal=29%
352	NFKB_C	NFKB_C		182	-0.530423	-2.16104	0	3.70545e-05	0.02	1218	tags=27%, list=9%, signal=29%
353	GO_RESPONSE_TO_INTERFERON_ALPHA	GO_RESPONSE_TO_INTERFERON_ALPHA		18	-0.816671	-2.15323	0	4.18645e-05	0.023	1339	tags=61%, list=9%, signal=67%
354	XU_HGF_TARGETS_INDUCED_BY_AKT1_6HR	XU_HGF_TARGETS_INDUCED_BY_AKT1_6HR		17	-0.833866	-2.15361	0	4.19235e-05	0.023	1305	tags=59%, list=9%, signal=65%
355	JECHLINGER_EPITHELIAL_TO_MESENCHYMAL_TRANSITION_UP	JECHLINGER_EPITHELIAL_TO_MESENCHYMAL_TRANSITION_UP		58	-0.633706	-2.15375	0	4.19826e-05	0.023	1194	tags=28%, list=8%, signal=30%
356	REACTOME_GROWTH_HORMONE_RECEPTOR_SIGNALING	REACTOME_GROWTH_HORMONE_RECEPTOR_SIGNALING		20	-0.790734	-2.15478	0	4.20419e-05	0.023	815	tags=55%, list=6%, signal=58%
357	GO_POSITIVE_REGULATION_OF_LOCOMOTION	GO_POSITIVE_REGULATION_OF_LOCOMOTION		285	-0.50136	-2.15162	0	4.72172e-05	0.026	1563	tags=27%, list=11%, signal=29%
358	ICHIBA_GRAFT_VERSUS_HOST_DISEASE_35D_UP	ICHIBA_GRAFT_VERSUS_HOST_DISEASE_35D_UP		107	-0.569096	-2.14737	0	5.06936e-05	0.028	1848	tags=31%, list=13%, signal=35%
359	GO_APOPTOTIC_SIGNALING_PATHWAY	GO_APOPTOTIC_SIGNALING_PATHWAY		229	-0.514246	-2.15017	0	5.07647e-05	0.028	1564	tags=27%, list=11%, signal=30%
360	MEL18_DN.V1_UP	MEL18_DN.V1_UP		101	-0.573636	-2.14514	0	5.20264e-05	0.029	1566	tags=35%, list=11%, signal=39%
361	REACTOME_APOPTOSIS	REACTOME_APOPTOSIS		121	-0.553101	-2.1454	0	5.21712e-05	0.029	2158	tags=31%, list=15%, signal=37%
362	GO_REGULATION_OF_STAT_CASCADE	GO_REGULATION_OF_STAT_CASCADE		82	-0.597274	-2.14629	0	5.23167e-05	0.029	1327	tags=35%, list=9%, signal=39%
363	GO_INTERACTION_WITH_HOST	GO_INTERACTION_WITH_HOST		114	-0.562193	-2.14696	0	5.23898e-05	0.029	559	tags=17%, list=4%, signal=17%
364	HALLMARK_APOPTOSIS	HALLMARK_APOPTOSIS		149	-0.544638	-2.14702	0	5.2463e-05	0.029	1564	tags=33%, list=11%, signal=37%
365	PLASARI_TGFB1_TARGETS_10HR_UP	PLASARI_TGFB1_TARGETS_10HR_UP		136	-0.549673	-2.14466	0	5.37594e-05	0.03	1525	tags=35%, list=11%, signal=39%
366	BIOCARTA_IL10_PATHWAY	BIOCARTA_IL10_PATHWAY		17	-0.828339	-2.14077	0	5.86432e-05	0.033	1099	tags=71%, list=8%, signal=76%
367	GO_ZYMOGEN_ACTIVATION	GO_ZYMOGEN_ACTIVATION		85	-0.586505	-2.14186	0	5.87239e-05	0.033	1564	tags=29%, list=11%, signal=33%
368	SCHOEN_NFKB_SIGNALING	SCHOEN_NFKB_SIGNALING		25	-0.758018	-2.14208	0	5.88048e-05	0.033	940	tags=60%, list=7%, signal=64%
369	KRAS.LUNG.BREAST_UP.V1_UP	KRAS.LUNG.BREAST_UP.V1_UP		81	-0.589409	-2.13675	0	6.01353e-05	0.034	1936	tags=38%, list=14%, signal=44%
370	GO_REGULATION_OF_INTERLEUKIN_1_SECRETION	GO_REGULATION_OF_INTERLEUKIN_1_SECRETION		21	-0.787001	-2.13743	0	6.02175e-05	0.034	1096	tags=52%, list=8%, signal=57%
371	MIKKELSEN_MCV6_LCP_WITH_H3K4ME3	MIKKELSEN_MCV6_LCP_WITH_H3K4ME3		97	-0.576535	-2.13838	0	6.03e-05	0.034	1980	tags=32%, list=14%, signal=37%
372	TONKS_TARGETS_OF_RUNX1_RUNX1T1_FUSION_MONOCYTE_UP	TONKS_TARGETS_OF_RUNX1_RUNX1T1_FUSION_MONOCYTE_UP		164	-0.526669	-2.13284	0	6.6947e-05	0.037	1381	tags=21%, list=10%, signal=23%
373	GO_POSITIVE_REGULATION_OF_INTERLEUKIN_1_PRODUCTION	GO_POSITIVE_REGULATION_OF_INTERLEUKIN_1_PRODUCTION		22	-0.781944	-2.1301	0	6.99898e-05	0.039	1096	tags=45%, list=8%, signal=49%
374	VANTVEER_BREAST_CANCER_ESR1_DN	VANTVEER_BREAST_CANCER_ESR1_DN		179	-0.526576	-2.13019	0	7.00845e-05	0.039	1684	tags=28%, list=12%, signal=31%
375	HAN_SATB1_TARGETS_DN	HAN_SATB1_TARGETS_DN		341	-0.48636	-2.13151	0	7.02747e-05	0.039	1454	tags=21%, list=10%, signal=23%
376	GO_NEGATIVE_REGULATION_OF_EXTRINSIC_APOPTOTIC_SIGNALING_PATHWAY_VIA_DEATH_DOMAIN_RECEPTORS	GO_NEGATIVE_REGULATION_OF_EXTRINSIC_APOPTOTIC_SIGNALING_PATHWAY_VIA_DEATH_DOMAIN_RECEPTORS		27	-0.726633	-2.12901	0	7.46724e-05	0.042	1707	tags=52%, list=12%, signal=59%
377	GO_POSITIVE_REGULATION_OF_INTERLEUKIN_8_PRODUCTION	GO_POSITIVE_REGULATION_OF_INTERLEUKIN_8_PRODUCTION		31	-0.712846	-2.12929	0	7.47727e-05	0.042	1450	tags=45%, list=10%, signal=50%
378	GO_ESTABLISHMENT_OF_ENDOTHELIAL_BARRIER	GO_ESTABLISHMENT_OF_ENDOTHELIAL_BARRIER		20	-0.774485	-2.12954	0	7.51763e-05	0.042	362	tags=30%, list=3%, signal=31%
379	ZHOU_TNF_SIGNALING_4HR	ZHOU_TNF_SIGNALING_4HR		45	-0.663918	-2.12752	0	7.79231e-05	0.044	422	tags=16%, list=3%, signal=16%
380	MUELLER_COMMON_TARGETS_OF_AML_FUSIONS_DN	MUELLER_COMMON_TARGETS_OF_AML_FUSIONS_DN		21	-0.771511	-2.12783	0	7.80274e-05	0.044	1679	tags=67%, list=12%, signal=76%
381	NFKB_Q6	NFKB_Q6		183	-0.52689	-2.12673	0	7.95568e-05	0.045	1566	tags=30%, list=11%, signal=33%
382	GO_POSITIVE_REGULATION_OF_INTERFERON_BETA_PRODUCTION	GO_POSITIVE_REGULATION_OF_INTERFERON_BETA_PRODUCTION		28	-0.708405	-2.12508	0	8.10669e-05	0.046	871	tags=43%, list=6%, signal=46%
383	GO_REGULATION_OF_APOPTOTIC_SIGNALING_PATHWAY	GO_REGULATION_OF_APOPTOTIC_SIGNALING_PATHWAY		284	-0.491443	-2.12433	0	8.26076e-05	0.047	1450	tags=23%, list=10%, signal=25%
384	GO_MYD88_INDEPENDENT_TOLL_LIKE_RECEPTOR_SIGNALING_PATHWAY	GO_MYD88_INDEPENDENT_TOLL_LIKE_RECEPTOR_SIGNALING_PATHWAY		30	-0.725601	-2.12468	0	8.27175e-05	0.047	925	tags=37%, list=7%, signal=39%
385	GO_REGULATION_OF_T_CELL_MIGRATION	GO_REGULATION_OF_T_CELL_MIGRATION		19	-0.769358	-2.12279	0	8.76526e-05	0.05	14	tags=21%, list=0%, signal=21%
386	GO_POSITIVE_REGULATION_OF_LYMPHOCYTE_MIGRATION	GO_POSITIVE_REGULATION_OF_LYMPHOCYTE_MIGRATION		19	-0.792392	-2.12212	0	8.92709e-05	0.051	591	tags=37%, list=4%, signal=38%
387	BIOCARTA_TNFR2_PATHWAY	BIOCARTA_TNFR2_PATHWAY		16	-0.79364	-2.12049	0	9.06037e-05	0.051	570	tags=44%, list=4%, signal=46%
388	BIOCARTA_HIVNEF_PATHWAY	BIOCARTA_HIVNEF_PATHWAY		54	-0.632999	-2.12087	0	9.07234e-05	0.051	1051	tags=37%, list=7%, signal=40%
389	GO_POSITIVE_REGULATION_OF_APOPTOTIC_SIGNALING_PATHWAY	GO_POSITIVE_REGULATION_OF_APOPTOTIC_SIGNALING_PATHWAY		146	-0.532246	-2.11695	0	9.52079e-05	0.053	1393	tags=22%, list=10%, signal=24%
390	DIRMEIER_LMP1_RESPONSE_EARLY	DIRMEIER_LMP1_RESPONSE_EARLY		59	-0.621294	-2.11846	0	9.54585e-05	0.053	1387	tags=51%, list=10%, signal=56%
391	GAVIN_PDE3B_TARGETS	GAVIN_PDE3B_TARGETS		21	-0.772863	-2.11914	0	9.55843e-05	0.053	600	tags=29%, list=4%, signal=30%
392	LEE_LIVER_CANCER_E2F1_UP	LEE_LIVER_CANCER_E2F1_UP		50	-0.633956	-2.11361	0	9.7751e-05	0.055	813	tags=20%, list=6%, signal=21%
393	BOYLAN_MULTIPLE_MYELOMA_D_DN	BOYLAN_MULTIPLE_MYELOMA_D_DN		57	-0.62032	-2.116	0	9.82621e-05	0.055	1096	tags=26%, list=8%, signal=28%
394	GO_NEGATIVE_REGULATION_OF_INFLAMMATORY_RESPONSE	GO_NEGATIVE_REGULATION_OF_INFLAMMATORY_RESPONSE		67	-0.606639	-2.11601	0	9.83907e-05	0.055	1104	tags=22%, list=8%, signal=24%
395	GO_CYTOPLASMIC_PATTERN_RECOGNITION_RECEPTOR_SIGNALING_PATHWAY	GO_CYTOPLASMIC_PATTERN_RECOGNITION_RECEPTOR_SIGNALING_PATHWAY		26	-0.733717	-2.11274	0	0.000102244	0.058	422	tags=35%, list=3%, signal=36%
396	GO_REGULATION_OF_LEUKOCYTE_APOPTOTIC_PROCESS	GO_REGULATION_OF_LEUKOCYTE_APOPTOTIC_PROCESS		62	-0.60951	-2.10945	0	0.000103384	0.059	1550	tags=32%, list=11%, signal=36%
397	CROMER_TUMORIGENESIS_UP	CROMER_TUMORIGENESIS_UP		46	-0.661793	-2.11017	0	0.000103518	0.059	995	tags=30%, list=7%, signal=33%
398	GO_TUMOR_NECROSIS_FACTOR_RECEPTOR_SUPERFAMILY_BINDING	GO_TUMOR_NECROSIS_FACTOR_RECEPTOR_SUPERFAMILY_BINDING		38	-0.660788	-2.10699	0	0.000107727	0.062	952	tags=34%, list=7%, signal=37%
399	GO_LEUKOCYTE_CELL_CELL_ADHESION	GO_LEUKOCYTE_CELL_CELL_ADHESION		193	-0.521368	-2.10544	0	0.000108404	0.063	1285	tags=27%, list=9%, signal=30%
400	GO_RESPONSE_TO_VITAMIN_D	GO_RESPONSE_TO_VITAMIN_D		27	-0.722192	-2.10547	0	0.000108541	0.063	1351	tags=41%, list=10%, signal=45%
401	ST_TUMOR_NECROSIS_FACTOR_PATHWAY	ST_TUMOR_NECROSIS_FACTOR_PATHWAY		25	-0.724006	-2.10597	0	0.000108679	0.063	878	tags=52%, list=6%, signal=55%
402	GO_REGULATION_OF_ERK1_AND_ERK2_CASCADE	GO_REGULATION_OF_ERK1_AND_ERK2_CASCADE		149	-0.536653	-2.10621	0	0.000108956	0.063	892	tags=23%, list=6%, signal=25%
403	REACTOME_TRAF6_MEDIATED_IRF7_ACTIVATION	REACTOME_TRAF6_MEDIATED_IRF7_ACTIVATION		17	-0.806673	-2.10629	0	0.000109095	0.063	984	tags=59%, list=7%, signal=63%
404	GO_REGULATION_OF_TYPE_I_INTERFERON_MEDIATED_SIGNALING_PATHWAY	GO_REGULATION_OF_TYPE_I_INTERFERON_MEDIATED_SIGNALING_PATHWAY		24	-0.762839	-2.10659	0	0.000109234	0.063	1135	tags=42%, list=8%, signal=45%
405	GO_POSITIVE_REGULATION_OF_B_CELL_PROLIFERATION	GO_POSITIVE_REGULATION_OF_B_CELL_PROLIFERATION		25	-0.7321	-2.10518	0	0.000109922	0.064	499	tags=40%, list=4%, signal=41%
406	GO_NEGATIVE_REGULATION_OF_IMMUNE_RESPONSE	GO_NEGATIVE_REGULATION_OF_IMMUNE_RESPONSE		92	-0.57477	-2.10348	0	0.000116176	0.068	1514	tags=28%, list=11%, signal=31%
407	ZHENG_IL22_SIGNALING_UP	ZHENG_IL22_SIGNALING_UP		36	-0.667765	-2.10305	0	0.000117384	0.069	1392	tags=44%, list=10%, signal=49%
408	GO_CELLULAR_RESPONSE_TO_HEAT	GO_CELLULAR_RESPONSE_TO_HEAT		24	-0.729651	-2.10328	0	0.000117531	0.069	1514	tags=42%, list=11%, signal=47%
409	WIERENGA_STAT5A_TARGETS_GROUP1	WIERENGA_STAT5A_TARGETS_GROUP1		83	-0.570209	-2.10265	0	0.000118867	0.07	1264	tags=30%, list=9%, signal=33%
410	GO_POSITIVE_REGULATION_OF_CYTOKINE_SECRETION	GO_POSITIVE_REGULATION_OF_CYTOKINE_SECRETION		65	-0.612906	-2.10169	0	0.000123644	0.072	1096	tags=37%, list=8%, signal=40%
411	GO_REGULATION_OF_LYMPHOCYTE_MIGRATION	GO_REGULATION_OF_LYMPHOCYTE_MIGRATION		29	-0.702528	-2.1005	0	0.00012822	0.075	591	tags=24%, list=4%, signal=25%
412	DEURIG_T_CELL_PROLYMPHOCYTIC_LEUKEMIA_DN	DEURIG_T_CELL_PROLYMPHOCYTIC_LEUKEMIA_DN		252	-0.495568	-2.10051	0	0.000128381	0.075	1754	tags=31%, list=12%, signal=34%
413	PID_TNF_PATHWAY	PID_TNF_PATHWAY		40	-0.669204	-2.09939	0	0.000131137	0.077	1790	tags=48%, list=13%, signal=54%
414	GO_DENDRITIC_CELL_DIFFERENTIATION	GO_DENDRITIC_CELL_DIFFERENTIATION		24	-0.73761	-2.0975	0	0.000135458	0.08	940	tags=42%, list=7%, signal=45%
415	GO_RESPONSE_TO_DSRNA	GO_RESPONSE_TO_DSRNA		49	-0.625651	-2.096	0	0.000138174	0.081	1135	tags=33%, list=8%, signal=35%
416	GO_ACTIVATION_OF_CYSTEINE_TYPE_ENDOPEPTIDASE_ACTIVITY	GO_ACTIVATION_OF_CYSTEINE_TYPE_ENDOPEPTIDASE_ACTIVITY		74	-0.589074	-2.09388	0	0.000153759	0.09	1564	tags=31%, list=11%, signal=35%
417	GO_ENDOTHELIAL_CELL_DEVELOPMENT	GO_ENDOTHELIAL_CELL_DEVELOPMENT		31	-0.705475	-2.09069	0	0.000165546	0.097	532	tags=29%, list=4%, signal=30%
418	MARZEC_IL2_SIGNALING_UP	MARZEC_IL2_SIGNALING_UP		95	-0.565746	-2.08919	0	0.000171492	0.101	1221	tags=33%, list=9%, signal=35%
419	LIEN_BREAST_CARCINOMA_METAPLASTIC_VS_DUCTAL_UP	LIEN_BREAST_CARCINOMA_METAPLASTIC_VS_DUCTAL_UP		54	-0.615216	-2.08847	0	0.000172653	0.102	1514	tags=31%, list=11%, signal=35%
420	GO_POSITIVE_REGULATION_OF_LYMPHOCYTE_DIFFERENTIATION	GO_POSITIVE_REGULATION_OF_LYMPHOCYTE_DIFFERENTIATION		59	-0.608863	-2.08879	0	0.000172864	0.102	1104	tags=34%, list=8%, signal=37%
421	GO_REGULATION_OF_CYTOKINE_PRODUCTION_INVOLVED_IN_IMMUNE_RESPONSE	GO_REGULATION_OF_CYTOKINE_PRODUCTION_INVOLVED_IN_IMMUNE_RESPONSE		40	-0.65251	-2.08771	0	0.00017562	0.104	1514	tags=28%, list=11%, signal=31%
422	GO_NEGATIVE_REGULATION_OF_CYTOKINE_PRODUCTION	GO_NEGATIVE_REGULATION_OF_CYTOKINE_PRODUCTION		142	-0.535698	-2.08609	0	0.000183328	0.108	1104	tags=24%, list=8%, signal=26%
423	GO_LEUKOCYTE_CHEMOTAXIS	GO_LEUKOCYTE_CHEMOTAXIS		79	-0.57656	-2.08535	0	0.00018939	0.112	1069	tags=29%, list=8%, signal=31%
424	GO_NECROPTOTIC_PROCESS	GO_NECROPTOTIC_PROCESS		21	-0.761055	-2.08459	0	0.000190727	0.113	1564	tags=48%, list=11%, signal=53%
425	GO_STAT_CASCADE	GO_STAT_CASCADE		39	-0.664753	-2.08318	0	0.000191379	0.114	815	tags=38%, list=6%, signal=41%
426	BAE_BRCA1_TARGETS_DN	BAE_BRCA1_TARGETS_DN		30	-0.694486	-2.08335	0	0.00019161	0.114	1099	tags=33%, list=8%, signal=36%
427	MURATA_VIRULENCE_OF_H_PILORI	MURATA_VIRULENCE_OF_H_PILORI		16	-0.81797	-2.08157	0	0.000192723	0.115	431	tags=25%, list=3%, signal=26%
428	GO_PROTEIN_TRIMERIZATION	GO_PROTEIN_TRIMERIZATION		29	-0.693365	-2.07937	0	0.000197192	0.118	1225	tags=28%, list=9%, signal=30%
429	PID_IL12_STAT4_PATHWAY	PID_IL12_STAT4_PATHWAY		29	-0.709633	-2.07807	0	0.000200944	0.119	1165	tags=48%, list=8%, signal=52%
430	BIOCARTA_NFKB_PATHWAY	BIOCARTA_NFKB_PATHWAY		22	-0.751537	-2.07697	0	0.000206403	0.123	878	tags=41%, list=6%, signal=44%
431	GO_REGULATION_OF_HEMOPOIESIS	GO_REGULATION_OF_HEMOPOIESIS		215	-0.498629	-2.07703	0	0.00020665	0.123	1146	tags=26%, list=8%, signal=28%
432	GO_LEUKOCYTE_MEDIATED_IMMUNITY	GO_LEUKOCYTE_MEDIATED_IMMUNITY		111	-0.544933	-2.07619	0	0.000210278	0.126	1540	tags=28%, list=11%, signal=31%
433	GO_POSITIVE_REGULATION_OF_TYPE_I_INTERFERON_PRODUCTION	GO_POSITIVE_REGULATION_OF_TYPE_I_INTERFERON_PRODUCTION		62	-0.593416	-2.07648	0	0.000210529	0.126	871	tags=29%, list=6%, signal=31%
434	DAZARD_UV_RESPONSE_CLUSTER_G28	DAZARD_UV_RESPONSE_CLUSTER_G28		17	-0.787943	-2.07555	0	0.000214667	0.129	1221	tags=65%, list=9%, signal=71%
435	REACTOME_CLASS_A1_RHODOPSIN_LIKE_RECEPTORS	REACTOME_CLASS_A1_RHODOPSIN_LIKE_RECEPTORS		112	-0.549712	-2.07293	0	0.000222538	0.135	1376	tags=26%, list=10%, signal=28%
436	YANG_BCL3_TARGETS_UP	YANG_BCL3_TARGETS_UP		254	-0.494303	-2.07407	0	0.000223066	0.135	631	tags=16%, list=4%, signal=16%
437	GO_REGULATION_OF_CYSTEINE_TYPE_ENDOPEPTIDASE_ACTIVITY_INVOLVED_IN_APOPTOTIC_SIGNALING_PATHWAY	GO_REGULATION_OF_CYSTEINE_TYPE_ENDOPEPTIDASE_ACTIVITY_INVOLVED_IN_APOPTOTIC_SIGNALING_PATHWAY		19	-0.764985	-2.07213	0.00389864	0.000224821	0.137	1707	tags=42%, list=12%, signal=48%
438	GO_REGULATION_OF_CHEMOKINE_PRODUCTION	GO_REGULATION_OF_CHEMOKINE_PRODUCTION		47	-0.635297	-2.07218	0	0.000225086	0.137	2220	tags=47%, list=16%, signal=55%
439	PID_CD40_PATHWAY	PID_CD40_PATHWAY		25	-0.730534	-2.07256	0	0.000225352	0.137	1198	tags=52%, list=8%, signal=57%
440	PLASARI_TGFB1_SIGNALING_VIA_NFIC_10HR_UP	PLASARI_TGFB1_SIGNALING_VIA_NFIC_10HR_UP		30	-0.695398	-2.0715	0	0.000230354	0.139	1251	tags=43%, list=9%, signal=47%
441	CHIANG_LIVER_CANCER_SUBCLASS_CTNNB1_DN	CHIANG_LIVER_CANCER_SUBCLASS_CTNNB1_DN		119	-0.541596	-2.06937	0	0.000237421	0.142	893	tags=22%, list=6%, signal=23%
442	GO_NEGATIVE_REGULATION_OF_RESPONSE_TO_WOUNDING	GO_NEGATIVE_REGULATION_OF_RESPONSE_TO_WOUNDING		100	-0.545799	-2.06879	0	0.000240205	0.144	1104	tags=22%, list=8%, signal=24%
443	GO_KERATINOCYTE_DIFFERENTIATION	GO_KERATINOCYTE_DIFFERENTIATION		42	-0.634656	-2.06703	0	0.000244501	0.146	1868	tags=38%, list=13%, signal=44%
444	SABATES_COLORECTAL_ADENOMA_UP	SABATES_COLORECTAL_ADENOMA_UP		66	-0.589524	-2.06669	0	0.000247251	0.148	1921	tags=30%, list=14%, signal=35%
445	GO_REGULATION_OF_PRODUCTION_OF_MOLECULAR_MEDIATOR_OF_IMMUNE_RESPONSE	GO_REGULATION_OF_PRODUCTION_OF_MOLECULAR_MEDIATOR_OF_IMMUNE_RESPONSE		66	-0.595689	-2.06549	0	0.000250908	0.151	1514	tags=29%, list=11%, signal=32%
446	WIERENGA_STAT5A_TARGETS_GROUP2	WIERENGA_STAT5A_TARGETS_GROUP2		45	-0.634043	-2.06557	0	0.000251201	0.151	1195	tags=40%, list=8%, signal=44%
447	GO_POSITIVE_REGULATION_OF_INTERLEUKIN_1_BETA_PRODUCTION	GO_POSITIVE_REGULATION_OF_INTERLEUKIN_1_BETA_PRODUCTION		18	-0.790125	-2.06383	0	0.0002597	0.156	1096	tags=50%, list=8%, signal=54%
448	ZHANG_ANTIVIRAL_RESPONSE_TO_RIBAVIRIN_DN	ZHANG_ANTIVIRAL_RESPONSE_TO_RIBAVIRIN_DN		42	-0.639747	-2.06346	0	0.000260903	0.156	1163	tags=33%, list=8%, signal=36%
449	GO_REGULATION_OF_ACTIVATED_T_CELL_PROLIFERATION	GO_REGULATION_OF_ACTIVATED_T_CELL_PROLIFERATION		28	-0.716353	-2.06262	0	0.000261783	0.157	1795	tags=50%, list=13%, signal=57%
450	SMID_BREAST_CANCER_BASAL_UP	SMID_BREAST_CANCER_BASAL_UP		422	-0.462605	-2.06319	0	0.000262087	0.157	1279	tags=20%, list=9%, signal=21%
451	GO_NECROTIC_CELL_DEATH	GO_NECROTIC_CELL_DEATH		27	-0.710412	-2.06115	0	0.000268991	0.16	1564	tags=48%, list=11%, signal=54%
452	GO_MYELOID_LEUKOCYTE_MIGRATION	GO_MYELOID_LEUKOCYTE_MIGRATION		67	-0.587361	-2.05919	0	0.000280696	0.167	640	tags=25%, list=5%, signal=26%
453	GO_POSITIVE_REGULATION_OF_CYSTEINE_TYPE_ENDOPEPTIDASE_ACTIVITY_INVOLVED_IN_APOPTOTIC_SIGNALING_PATHWAY	GO_POSITIVE_REGULATION_OF_CYSTEINE_TYPE_ENDOPEPTIDASE_ACTIVITY_INVOLVED_IN_APOPTOTIC_SIGNALING_PATHWAY		16	-0.787685	-2.05735	0	0.000288724	0.171	1707	tags=50%, list=12%, signal=57%
454	TSAI_RESPONSE_TO_IONIZING_RADIATION	TSAI_RESPONSE_TO_IONIZING_RADIATION		126	-0.539031	-2.0542	0	0.000310473	0.182	1180	tags=29%, list=8%, signal=31%
455	ONDER_CDH1_SIGNALING_VIA_CTNNB1	ONDER_CDH1_SIGNALING_VIA_CTNNB1		55	-0.605525	-2.05252	0	0.000313853	0.185	366	tags=16%, list=3%, signal=17%
456	GO_REGULATION_OF_INTERLEUKIN_8_PRODUCTION	GO_REGULATION_OF_INTERLEUKIN_8_PRODUCTION		43	-0.636542	-2.05278	0	0.000314213	0.185	1450	tags=40%, list=10%, signal=44%
457	GILDEA_METASTASIS	GILDEA_METASTASIS		23	-0.729324	-2.05191	0	0.000314966	0.186	826	tags=26%, list=6%, signal=28%
458	GO_REGULATION_OF_VASCULATURE_DEVELOPMENT	GO_REGULATION_OF_VASCULATURE_DEVELOPMENT		149	-0.508635	-2.05038	0	0.000319052	0.188	1566	tags=33%, list=11%, signal=37%
459	GO_CELL_CHEMOTAXIS	GO_CELL_CHEMOTAXIS		116	-0.530777	-2.04964	0	0.000322752	0.191	1262	tags=30%, list=9%, signal=33%
460	GO_REGULATION_OF_LEUKOCYTE_MEDIATED_IMMUNITY	GO_REGULATION_OF_LEUKOCYTE_MEDIATED_IMMUNITY		110	-0.532163	-2.0497	0	0.00032312	0.191	1514	tags=27%, list=11%, signal=30%
461	MIKKELSEN_MEF_LCP_WITH_H3K4ME3	MIKKELSEN_MEF_LCP_WITH_H3K4ME3		88	-0.552461	-2.04879	0	0.000326454	0.193	1454	tags=25%, list=10%, signal=28%
462	GO_ACTIVATION_OF_IMMUNE_RESPONSE	GO_ACTIVATION_OF_IMMUNE_RESPONSE		313	-0.469231	-2.0491	0	0.000326826	0.193	1620	tags=24%, list=11%, signal=27%
463	GO_POSITIVE_REGULATION_OF_NF_KAPPAB_IMPORT_INTO_NUCLEUS	GO_POSITIVE_REGULATION_OF_NF_KAPPAB_IMPORT_INTO_NUCLEUS		23	-0.744003	-2.04795	0	0.000331956	0.197	1104	tags=48%, list=8%, signal=52%
464	GO_POSITIVE_REGULATION_OF_CHEMOKINE_PRODUCTION	GO_POSITIVE_REGULATION_OF_CHEMOKINE_PRODUCTION		38	-0.654744	-2.04688	0	0.00033305	0.198	1540	tags=42%, list=11%, signal=47%
465	HALLMARK_EPITHELIAL_MESENCHYMAL_TRANSITION	HALLMARK_EPITHELIAL_MESENCHYMAL_TRANSITION		141	-0.520983	-2.04625	0	0.000333765	0.199	1840	tags=24%, list=13%, signal=27%
466	GO_REGULATION_OF_LEUKOCYTE_DIFFERENTIATION	GO_REGULATION_OF_LEUKOCYTE_DIFFERENTIATION		166	-0.513707	-2.04583	0	0.000334861	0.2	1146	tags=27%, list=8%, signal=28%
467	PAPASPYRIDONOS_UNSTABLE_ATEROSCLEROTIC_PLAQUE_UP	PAPASPYRIDONOS_UNSTABLE_ATEROSCLEROTIC_PLAQUE_UP		45	-0.640809	-2.04576	0	0.000335951	0.201	399	tags=20%, list=3%, signal=21%
468	TRAYNOR_RETT_SYNDROM_UP	TRAYNOR_RETT_SYNDROM_UP		33	-0.677104	-2.04173	0	0.000345669	0.209	2036	tags=45%, list=14%, signal=53%
469	BOQUEST_STEM_CELL_CULTURED_VS_FRESH_UP	BOQUEST_STEM_CELL_CULTURED_VS_FRESH_UP		321	-0.468958	-2.03967	0	0.000356092	0.217	1216	tags=22%, list=9%, signal=23%
470	GO_RESPONSE_TO_HYDROGEN_PEROXIDE	GO_RESPONSE_TO_HYDROGEN_PEROXIDE		88	-0.563212	-2.03872	0	0.000358576	0.218	1559	tags=34%, list=11%, signal=38%
471	GO_POSITIVE_REGULATION_OF_CD4_POSITIVE_ALPHA_BETA_T_CELL_ACTIVATION	GO_POSITIVE_REGULATION_OF_CD4_POSITIVE_ALPHA_BETA_T_CELL_ACTIVATION		21	-0.756286	-2.03641	0	0.00036378	0.222	1104	tags=48%, list=8%, signal=52%
472	GO_REGULATION_OF_ENDOTHELIAL_CELL_APOPTOTIC_PROCESS	GO_REGULATION_OF_ENDOTHELIAL_CELL_APOPTOTIC_PROCESS		22	-0.746257	-2.03646	0	0.000364183	0.222	999	tags=45%, list=7%, signal=49%
473	MEK_UP.V1_DN	MEK_UP.V1_DN		143	-0.513232	-2.03504	0	0.000368329	0.224	1400	tags=27%, list=10%, signal=30%
474	GAVIN_FOXP3_TARGETS_CLUSTER_P2	GAVIN_FOXP3_TARGETS_CLUSTER_P2		57	-0.598773	-2.03392	0	0.000368541	0.225	2264	tags=42%, list=16%, signal=50%
475	LU_TUMOR_VASCULATURE_UP	LU_TUMOR_VASCULATURE_UP		20	-0.752704	-2.03441	0	0.000369355	0.225	1433	tags=35%, list=10%, signal=39%
476	FERRARI_RESPONSE_TO_FENRETINIDE_UP	FERRARI_RESPONSE_TO_FENRETINIDE_UP		17	-0.779918	-2.03349	0	0.000370994	0.226	1278	tags=53%, list=9%, signal=58%
477	ZUCCHI_METASTASIS_DN	ZUCCHI_METASTASIS_DN		35	-0.662794	-2.03246	0	0.000377714	0.23	424	tags=23%, list=3%, signal=24%
478	REACTOME_GPCR_LIGAND_BINDING	REACTOME_GPCR_LIGAND_BINDING		149	-0.521142	-2.03234	0	0.000378726	0.231	1833	tags=28%, list=13%, signal=31%
479	GO_POSITIVE_REGULATION_OF_CELL_ADHESION	GO_POSITIVE_REGULATION_OF_CELL_ADHESION		263	-0.479937	-2.03161	0	0.000382546	0.234	1285	tags=21%, list=9%, signal=22%
480	GO_POSITIVE_REGULATION_OF_PRODUCTION_OF_MOLECULAR_MEDIATOR_OF_IMMUNE_RESPONSE	GO_POSITIVE_REGULATION_OF_PRODUCTION_OF_MOLECULAR_MEDIATOR_OF_IMMUNE_RESPONSE		42	-0.632626	-2.03098	0	0.000385991	0.237	1380	tags=29%, list=10%, signal=32%
481	GO_REGULATION_OF_B_CELL_PROLIFERATION	GO_REGULATION_OF_B_CELL_PROLIFERATION		40	-0.631954	-2.03103	0	0.000386414	0.237	757	tags=33%, list=5%, signal=34%
482	GO_NEGATIVE_REGULATION_OF_CYSTEINE_TYPE_ENDOPEPTIDASE_ACTIVITY	GO_NEGATIVE_REGULATION_OF_CYSTEINE_TYPE_ENDOPEPTIDASE_ACTIVITY		65	-0.572228	-2.02987	0	0.000389979	0.24	847	tags=25%, list=6%, signal=26%
483	GO_LIPOPOLYSACCHARIDE_MEDIATED_SIGNALING_PATHWAY	GO_LIPOPOLYSACCHARIDE_MEDIATED_SIGNALING_PATHWAY		28	-0.693359	-2.02988	0	0.000390405	0.24	878	tags=36%, list=6%, signal=38%
484	GO_ADAPTIVE_IMMUNE_RESPONSE_BASED_ON_SOMATIC_RECOMBINATION_OF_IMMUNE_RECEPTORS_BUILT_FROM_IMMUNOGLOBULIN_SUPERFAMILY_DOMAINS	GO_ADAPTIVE_IMMUNE_RESPONSE_BASED_ON_SOMATIC_RECOMBINATION_OF_IMMUNE_RECEPTORS_BUILT_FROM_IMMUNOGLOBULIN_SUPERFAMILY_DOMAINS		97	-0.546653	-2.02998	0	0.000390831	0.24	1540	tags=31%, list=11%, signal=34%
485	GOLDRATH_NAIVE_VS_MEMORY_CD8_TCELL_DN	GOLDRATH_NAIVE_VS_MEMORY_CD8_TCELL_DN		166	-0.504158	-2.03052	0	0.000391258	0.24	1098	tags=22%, list=8%, signal=24%
486	GO_ALPHA_BETA_T_CELL_ACTIVATION	GO_ALPHA_BETA_T_CELL_ACTIVATION		41	-0.639356	-2.02845	0	0.000396775	0.243	1127	tags=37%, list=8%, signal=40%
487	GO_REGULATION_OF_T_HELPER_1_TYPE_IMMUNE_RESPONSE	GO_REGULATION_OF_T_HELPER_1_TYPE_IMMUNE_RESPONSE		18	-0.779003	-2.02884	0	0.000397206	0.243	1104	tags=44%, list=8%, signal=48%
488	GO_CELLULAR_RESPONSE_TO_LIPID	GO_CELLULAR_RESPONSE_TO_LIPID		299	-0.470872	-2.029	0	0.000397638	0.243	1393	tags=23%, list=10%, signal=25%
489	PID_CERAMIDE_PATHWAY	PID_CERAMIDE_PATHWAY		44	-0.612192	-2.02808	0	0.000400104	0.246	1051	tags=32%, list=7%, signal=34%
490	ZHENG_RESPONSE_TO_ARSENITE_UP	ZHENG_RESPONSE_TO_ARSENITE_UP		15	-0.786486	-2.02692	0	0.000409515	0.25	1688	tags=73%, list=12%, signal=83%
491	WU_HBX_TARGETS_1_UP	WU_HBX_TARGETS_1_UP		16	-0.787226	-2.02573	0	0.000422652	0.259	1454	tags=44%, list=10%, signal=49%
492	GO_CYTOKINE_RECEPTOR_ACTIVITY	GO_CYTOKINE_RECEPTOR_ACTIVITY		54	-0.599884	-2.02505	0	0.000424987	0.261	1104	tags=28%, list=8%, signal=30%
493	BROCKE_APOPTOSIS_REVERSED_BY_IL6	BROCKE_APOPTOSIS_REVERSED_BY_IL6		119	-0.531533	-2.02448	0	0.000428245	0.264	1407	tags=33%, list=10%, signal=36%
494	WU_CELL_MIGRATION	WU_CELL_MIGRATION		126	-0.522458	-2.02335	0	0.000445836	0.27	1801	tags=29%, list=13%, signal=33%
495	GO_REGULATION_OF_PROTEIN_SECRETION	GO_REGULATION_OF_PROTEIN_SECRETION		253	-0.476446	-2.02261	0	0.000451831	0.273	1612	tags=23%, list=11%, signal=25%
496	GO_REGULATION_OF_TUMOR_NECROSIS_FACTOR_SUPERFAMILY_CYTOKINE_PRODUCTION	GO_REGULATION_OF_TUMOR_NECROSIS_FACTOR_SUPERFAMILY_CYTOKINE_PRODUCTION		78	-0.565037	-2.02074	0	0.000461434	0.278	1565	tags=28%, list=11%, signal=32%
497	REACTOME_NUCLEOTIDE_BINDING_DOMAIN_LEUCINE_RICH_REPEAT_CONTAINING_RECEPTOR_NLR_SIGNALING_PATHWAYS	REACTOME_NUCLEOTIDE_BINDING_DOMAIN_LEUCINE_RICH_REPEAT_CONTAINING_RECEPTOR_NLR_SIGNALING_PATHWAYS		33	-0.672073	-2.02025	0	0.00046877	0.281	1418	tags=48%, list=10%, signal=54%
498	GO_REGULATION_OF_INTERFERON_ALPHA_PRODUCTION	GO_REGULATION_OF_INTERFERON_ALPHA_PRODUCTION		17	-0.774615	-2.01982	0	0.000469636	0.282	871	tags=53%, list=6%, signal=56%
499	GARGALOVIC_RESPONSE_TO_OXIDIZED_PHOSPHOLIPIDS_BLUE_UP	GARGALOVIC_RESPONSE_TO_OXIDIZED_PHOSPHOLIPIDS_BLUE_UP		105	-0.536304	-2.01948	0	0.000473272	0.284	1900	tags=38%, list=13%, signal=44%
500	GO_POSITIVE_REGULATION_OF_LEUKOCYTE_APOPTOTIC_PROCESS	GO_POSITIVE_REGULATION_OF_LEUKOCYTE_APOPTOTIC_PROCESS		21	-0.738257	-2.0194	0	0.000474162	0.284	1044	tags=43%, list=7%, signal=46%
501	SCIAN_INVERSED_TARGETS_OF_TP53_AND_TP73_DN	SCIAN_INVERSED_TARGETS_OF_TP53_AND_TP73_DN		25	-0.701983	-2.01915	0	0.000476399	0.286	1114	tags=36%, list=8%, signal=39%
502	XU_RESPONSE_TO_TRETINOIN_AND_NSC682994_UP	XU_RESPONSE_TO_TRETINOIN_AND_NSC682994_UP		17	-0.77729	-2.01894	0	0.000477275	0.287	611	tags=35%, list=4%, signal=37%
503	KEGG_HEMATOPOIETIC_CELL_LINEAGE	KEGG_HEMATOPOIETIC_CELL_LINEAGE		57	-0.591863	-2.01875	0	0.000478142	0.288	1276	tags=30%, list=9%, signal=33%
504	GO_REGULATION_OF_T_CELL_APOPTOTIC_PROCESS	GO_REGULATION_OF_T_CELL_APOPTOTIC_PROCESS		21	-0.733355	-2.01815	0	0.000488138	0.294	1044	tags=29%, list=7%, signal=31%
505	GO_REGULATION_OF_ALPHA_BETA_T_CELL_DIFFERENTIATION	GO_REGULATION_OF_ALPHA_BETA_T_CELL_DIFFERENTIATION		35	-0.663979	-2.01728	0	0.000492532	0.297	1127	tags=43%, list=8%, signal=46%
506	ST_GA13_PATHWAY	ST_GA13_PATHWAY		31	-0.666587	-2.01693	0	0.000495582	0.3	1292	tags=42%, list=9%, signal=46%
507	GO_NEGATIVE_REGULATION_OF_IMMUNE_SYSTEM_PROCESS	GO_NEGATIVE_REGULATION_OF_IMMUNE_SYSTEM_PROCESS		272	-0.477943	-2.017	0	0.000496104	0.3	1620	tags=25%, list=11%, signal=28%
508	BILD_HRAS_ONCOGENIC_SIGNATURE	BILD_HRAS_ONCOGENIC_SIGNATURE		193	-0.484667	-2.01471	0	0.000512512	0.31	1396	tags=28%, list=10%, signal=31%
509	GO_REGULATION_OF_CELL_ADHESION	GO_REGULATION_OF_CELL_ADHESION		438	-0.452286	-2.01378	0	0.000516859	0.313	1285	tags=20%, list=9%, signal=21%
510	BROWNE_HCMV_INFECTION_8HR_UP	BROWNE_HCMV_INFECTION_8HR_UP		85	-0.555604	-2.01248	0	0.000527194	0.317	1503	tags=32%, list=11%, signal=35%
511	REACTOME_ANTIVIRAL_MECHANISM_BY_IFN_STIMULATED_GENES	REACTOME_ANTIVIRAL_MECHANISM_BY_IFN_STIMULATED_GENES		61	-0.585564	-2.01224	0	0.000529349	0.319	1225	tags=28%, list=9%, signal=30%
512	ABBUD_LIF_SIGNALING_1_UP	ABBUD_LIF_SIGNALING_1_UP		32	-0.66231	-2.01067	0	0.000537683	0.322	1392	tags=41%, list=10%, signal=45%
513	IRF1_01	IRF1_01		156	-0.504809	-2.01031	0	0.000541181	0.324	1384	tags=24%, list=10%, signal=26%
514	GO_REGULATION_OF_T_CELL_MEDIATED_IMMUNITY	GO_REGULATION_OF_T_CELL_MEDIATED_IMMUNITY		35	-0.641634	-2.00953	0	0.000547576	0.328	1104	tags=26%, list=8%, signal=28%
515	PECE_MAMMARY_STEM_CELL_UP	PECE_MAMMARY_STEM_CELL_UP		115	-0.527686	-2.00956	0	0.000548145	0.328	1554	tags=19%, list=11%, signal=21%
516	NOJIMA_SFRP2_TARGETS_DN	NOJIMA_SFRP2_TARGETS_DN		22	-0.731374	-2.00874	0	0.000555029	0.333	1504	tags=50%, list=11%, signal=56%
517	GO_POSITIVE_REGULATION_OF_TRANSCRIPTION_FACTOR_IMPORT_INTO_NUCLEUS	GO_POSITIVE_REGULATION_OF_TRANSCRIPTION_FACTOR_IMPORT_INTO_NUCLEUS		41	-0.636166	-2.00739	0	0.000570859	0.345	1566	tags=39%, list=11%, signal=44%
518	NATSUME_RESPONSE_TO_INTERFERON_BETA_UP	NATSUME_RESPONSE_TO_INTERFERON_BETA_UP		54	-0.592402	-2.00773	0	0.000571287	0.344	1564	tags=39%, list=11%, signal=44%
519	LIU_VAV3_PROSTATE_CARCINOGENESIS_UP	LIU_VAV3_PROSTATE_CARCINOGENESIS_UP		72	-0.565993	-2.00739	0	0.000571449	0.345	2226	tags=35%, list=16%, signal=41%
520	HAHTOLA_MYCOSIS_FUNGOIDES_CD4_UP	HAHTOLA_MYCOSIS_FUNGOIDES_CD4_UP		62	-0.580721	-2.00742	0	0.000572039	0.345	1134	tags=37%, list=8%, signal=40%
521	GO_NEGATIVE_REGULATION_OF_CELLULAR_RESPONSE_TO_INSULIN_STIMULUS	GO_NEGATIVE_REGULATION_OF_CELLULAR_RESPONSE_TO_INSULIN_STIMULUS		22	-0.727884	-2.00671	0	0.000575635	0.348	1051	tags=41%, list=7%, signal=44%
522	GO_NEGATIVE_REGULATION_OF_IMMUNE_EFFECTOR_PROCESS	GO_NEGATIVE_REGULATION_OF_IMMUNE_EFFECTOR_PROCESS		79	-0.562771	-2.0059	0	0.000586423	0.352	1514	tags=25%, list=11%, signal=28%
523	KEGG_GRAFT_VERSUS_HOST_DISEASE	KEGG_GRAFT_VERSUS_HOST_DISEASE		29	-0.674239	-2.00603	0	0.000587027	0.352	2000	tags=45%, list=14%, signal=52%
524	GO_POSITIVE_REGULATION_OF_ADAPTIVE_IMMUNE_RESPONSE	GO_POSITIVE_REGULATION_OF_ADAPTIVE_IMMUNE_RESPONSE		55	-0.601685	-2.00452	0	0.000598496	0.359	1147	tags=27%, list=8%, signal=30%
525	GO_ENDOTHELIAL_CELL_DIFFERENTIATION	GO_ENDOTHELIAL_CELL_DIFFERENTIATION		46	-0.620473	-2.00427	0	0.000599206	0.359	1088	tags=26%, list=8%, signal=28%
526	KEGG_ALLOGRAFT_REJECTION	KEGG_ALLOGRAFT_REJECTION		29	-0.676432	-2.00311	0.00187617	0.000602626	0.363	2000	tags=45%, list=14%, signal=52%
527	GO_MYELOID_DENDRITIC_CELL_DIFFERENTIATION	GO_MYELOID_DENDRITIC_CELL_DIFFERENTIATION		15	-0.773064	-2.0009	0	0.00061924	0.368	940	tags=47%, list=7%, signal=50%
528	GO_MYELOID_LEUKOCYTE_ACTIVATION	GO_MYELOID_LEUKOCYTE_ACTIVATION		68	-0.580506	-2.00067	0	0.000619919	0.369	1550	tags=32%, list=11%, signal=36%
529	GO_REGULATION_OF_CELLULAR_RESPONSE_TO_INSULIN_STIMULUS	GO_REGULATION_OF_CELLULAR_RESPONSE_TO_INSULIN_STIMULUS		38	-0.634285	-1.99956	0	0.000630455	0.375	650	tags=26%, list=5%, signal=28%
530	DAZARD_UV_RESPONSE_CLUSTER_G2	DAZARD_UV_RESPONSE_CLUSTER_G2		23	-0.719717	-1.99932	0	0.000631131	0.376	1387	tags=52%, list=10%, signal=58%
531	GO_SIDE_OF_MEMBRANE	GO_SIDE_OF_MEMBRANE		271	-0.471556	-1.99669	0	0.00066321	0.39	1647	tags=23%, list=12%, signal=25%
532	KEGG_INTESTINAL_IMMUNE_NETWORK_FOR_IGA_PRODUCTION	KEGG_INTESTINAL_IMMUNE_NETWORK_FOR_IGA_PRODUCTION		32	-0.661733	-1.99643	0	0.00066644	0.391	1189	tags=28%, list=8%, signal=31%
533	GO_LYMPHOCYTE_MEDIATED_IMMUNITY	GO_LYMPHOCYTE_MEDIATED_IMMUNITY		83	-0.55349	-1.99575	0	0.000670929	0.393	1484	tags=28%, list=10%, signal=31%
534	DELYS_THYROID_CANCER_UP	DELYS_THYROID_CANCER_UP		325	-0.461483	-1.99527	0	0.000675459	0.396	1396	tags=19%, list=10%, signal=21%
535	GO_REGULATION_OF_B_CELL_ACTIVATION	GO_REGULATION_OF_B_CELL_ACTIVATION		82	-0.550832	-1.99262	0	0.000705209	0.412	1147	tags=29%, list=8%, signal=32%
536	GO_CELL_CELL_ADHESION	GO_CELL_CELL_ADHESION		353	-0.454704	-1.9915	0	0.000717475	0.417	1858	tags=26%, list=13%, signal=30%
537	GO_REGULATION_OF_EPITHELIAL_CELL_APOPTOTIC_PROCESS	GO_REGULATION_OF_EPITHELIAL_CELL_APOPTOTIC_PROCESS		35	-0.640445	-1.98973	0	0.000739973	0.433	999	tags=34%, list=7%, signal=37%
538	GO_NEGATIVE_REGULATION_OF_CYTOKINE_SECRETION	GO_NEGATIVE_REGULATION_OF_CYTOKINE_SECRETION		26	-0.689102	-1.98936	0	0.00075087	0.439	878	tags=35%, list=6%, signal=37%
539	STK33_NOMO_UP	STK33_NOMO_UP		233	-0.473814	-1.98859	0	0.000755811	0.441	1865	tags=33%, list=13%, signal=38%
540	POOLA_INVASIVE_BREAST_CANCER_UP	POOLA_INVASIVE_BREAST_CANCER_UP		229	-0.476373	-1.98727	0	0.000778551	0.452	1290	tags=20%, list=9%, signal=21%
541	GO_POSITIVE_REGULATION_OF_PEPTIDASE_ACTIVITY	GO_POSITIVE_REGULATION_OF_PEPTIDASE_ACTIVITY		114	-0.519908	-1.98671	0	0.000783466	0.456	1707	tags=28%, list=12%, signal=32%
542	GO_LEUKOCYTE_MIGRATION	GO_LEUKOCYTE_MIGRATION		180	-0.490141	-1.98679	0	0.000784242	0.456	1195	tags=22%, list=8%, signal=23%
543	KRAS.DF.V1_UP	KRAS.DF.V1_UP		152	-0.502429	-1.986	0	0.000785728	0.457	1566	tags=26%, list=11%, signal=29%
544	WNT_UP.V1_DN	WNT_UP.V1_DN		103	-0.525299	-1.9855	0	0.000787997	0.457	1135	tags=21%, list=8%, signal=23%
545	GO_EXTRINSIC_APOPTOTIC_SIGNALING_PATHWAY_VIA_DEATH_DOMAIN_RECEPTORS	GO_EXTRINSIC_APOPTOTIC_SIGNALING_PATHWAY_VIA_DEATH_DOMAIN_RECEPTORS		36	-0.645351	-1.98503	0	0.00079536	0.462	1707	tags=47%, list=12%, signal=54%
546	BAUS_TFF2_TARGETS_UP	BAUS_TFF2_TARGETS_UP		24	-0.704597	-1.98512	0	0.000796143	0.462	1030	tags=38%, list=7%, signal=40%
547	FLECHNER_BIOPSY_KIDNEY_TRANSPLANT_REJECTED_VS_OK_UP	FLECHNER_BIOPSY_KIDNEY_TRANSPLANT_REJECTED_VS_OK_UP		77	-0.554205	-1.98463	0	0.000800903	0.464	1403	tags=25%, list=10%, signal=27%
548	OSADA_ASCL1_TARGETS_DN	OSADA_ASCL1_TARGETS_DN		17	-0.771683	-1.98287	0	0.000817359	0.47	1261	tags=47%, list=9%, signal=52%
549	TAKAO_RESPONSE_TO_UVB_RADIATION_DN	TAKAO_RESPONSE_TO_UVB_RADIATION_DN		85	-0.546869	-1.9832	0	0.000817699	0.47	1275	tags=25%, list=9%, signal=27%
550	GO_POSITIVE_REGULATION_OF_GLYCOPROTEIN_METABOLIC_PROCESS	GO_POSITIVE_REGULATION_OF_GLYCOPROTEIN_METABOLIC_PROCESS		17	-0.76468	-1.98269	0	0.000817832	0.47	482	tags=29%, list=3%, signal=30%
551	GO_REGULATION_OF_TOLL_LIKE_RECEPTOR_SIGNALING_PATHWAY	GO_REGULATION_OF_TOLL_LIKE_RECEPTOR_SIGNALING_PATHWAY		36	-0.651479	-1.97978	0	0.000845813	0.48	732	tags=33%, list=5%, signal=35%
552	GO_SINGLE_ORGANISM_CELL_ADHESION	GO_SINGLE_ORGANISM_CELL_ADHESION		314	-0.455916	-1.97866	0	0.000860622	0.489	1327	tags=22%, list=9%, signal=24%
553	ST_FAS_SIGNALING_PATHWAY	ST_FAS_SIGNALING_PATHWAY		53	-0.587631	-1.97789	0.00196078	0.000869885	0.491	951	tags=28%, list=7%, signal=30%
554	GO_NEGATIVE_REGULATION_OF_VIRAL_ENTRY_INTO_HOST_CELL	GO_NEGATIVE_REGULATION_OF_VIRAL_ENTRY_INTO_HOST_CELL		15	-0.789969	-1.97762	0	0.000872792	0.492	525	tags=47%, list=4%, signal=48%
555	NOJIMA_SFRP2_TARGETS_UP	NOJIMA_SFRP2_TARGETS_UP		25	-0.694654	-1.97465	0	0.000917869	0.505	1228	tags=48%, list=9%, signal=52%
556	GO_REGULATION_OF_ALPHA_BETA_T_CELL_ACTIVATION	GO_REGULATION_OF_ALPHA_BETA_T_CELL_ACTIVATION		52	-0.612542	-1.97405	0	0.000926495	0.51	1127	tags=35%, list=8%, signal=37%
557	GO_REGULATION_OF_DEFENSE_RESPONSE_TO_VIRUS	GO_REGULATION_OF_DEFENSE_RESPONSE_TO_VIRUS		136	-0.504512	-1.97394	0	0.000926843	0.51	1176	tags=20%, list=8%, signal=21%
558	GARGALOVIC_RESPONSE_TO_OXIDIZED_PHOSPHOLIPIDS_YELLOW_UP	GARGALOVIC_RESPONSE_TO_OXIDIZED_PHOSPHOLIPIDS_YELLOW_UP		21	-0.70591	-1.97379	0.00204082	0.000927196	0.51	1514	tags=52%, list=11%, signal=59%
559	FURUKAWA_DUSP6_TARGETS_PCI35_UP	FURUKAWA_DUSP6_TARGETS_PCI35_UP		44	-0.611505	-1.97312	0	0.000932479	0.513	2423	tags=43%, list=17%, signal=52%
560	GO_REGULATION_OF_TRANSCRIPTION_FACTOR_IMPORT_INTO_NUCLEUS	GO_REGULATION_OF_TRANSCRIPTION_FACTOR_IMPORT_INTO_NUCLEUS		77	-0.551065	-1.97029	0	0.000969259	0.529	1566	tags=32%, list=11%, signal=36%
561	GO_REGULATION_OF_INTERLEUKIN_6_PRODUCTION	GO_REGULATION_OF_INTERLEUKIN_6_PRODUCTION		74	-0.555164	-1.96716	0	0.00101791	0.552	1069	tags=27%, list=8%, signal=29%
562	KEGG_AUTOIMMUNE_THYROID_DISEASE	KEGG_AUTOIMMUNE_THYROID_DISEASE		31	-0.644661	-1.96585	0	0.00103108	0.557	2000	tags=39%, list=14%, signal=45%
563	GO_DEFENSE_RESPONSE_TO_BACTERIUM	GO_DEFENSE_RESPONSE_TO_BACTERIUM		108	-0.52439	-1.96472	0	0.00104147	0.563	1549	tags=26%, list=11%, signal=29%
564	GO_REGULATION_OF_SEQUENCE_SPECIFIC_DNA_BINDING_TRANSCRIPTION_FACTOR_ACTIVITY	GO_REGULATION_OF_SEQUENCE_SPECIFIC_DNA_BINDING_TRANSCRIPTION_FACTOR_ACTIVITY		263	-0.461433	-1.96432	0	0.00104544	0.565	1599	tags=23%, list=11%, signal=26%
565	GO_POSITIVE_REGULATION_OF_CARTILAGE_DEVELOPMENT	GO_POSITIVE_REGULATION_OF_CARTILAGE_DEVELOPMENT		17	-0.752815	-1.96349	0	0.00106288	0.571	2120	tags=47%, list=15%, signal=55%
566	BAELDE_DIABETIC_NEPHROPATHY_DN	BAELDE_DIABETIC_NEPHROPATHY_DN		342	-0.45042	-1.96267	0	0.00107535	0.572	1403	tags=21%, list=10%, signal=23%
567	REACTOME_ACTIVATION_OF_NF_KAPPAB_IN_B_CELLS	REACTOME_ACTIVATION_OF_NF_KAPPAB_IN_B_CELLS		56	-0.574131	-1.96101	0	0.00109084	0.577	2108	tags=32%, list=15%, signal=38%
568	BIOCARTA_IL1R_PATHWAY	BIOCARTA_IL1R_PATHWAY		29	-0.666991	-1.95994	0.00209205	0.00110227	0.578	951	tags=38%, list=7%, signal=41%
569	GO_PROTEIN_PHOSPHATASE_2A_BINDING	GO_PROTEIN_PHOSPHATASE_2A_BINDING		24	-0.685516	-1.95883	0.00204082	0.00111729	0.583	1393	tags=38%, list=10%, signal=42%
570	GO_NEGATIVE_REGULATION_OF_I_KAPPAB_KINASE_NF_KAPPAB_SIGNALING	GO_NEGATIVE_REGULATION_OF_I_KAPPAB_KINASE_NF_KAPPAB_SIGNALING		40	-0.62596	-1.95887	0	0.00111834	0.583	773	tags=33%, list=5%, signal=34%
571	GO_POSITIVE_REGULATION_OF_HEMOPOIESIS	GO_POSITIVE_REGULATION_OF_HEMOPOIESIS		117	-0.511292	-1.95831	0	0.00112478	0.586	1228	tags=28%, list=9%, signal=31%
572	GO_DEATH_RECEPTOR_ACTIVITY	GO_DEATH_RECEPTOR_ACTIVITY		17	-0.749448	-1.95807	0	0.00113108	0.589	1208	tags=47%, list=9%, signal=51%
573	JEON_SMAD6_TARGETS_UP	JEON_SMAD6_TARGETS_UP		17	-0.744891	-1.95763	0	0.00113622	0.59	1228	tags=47%, list=9%, signal=51%
574	GO_REGULATION_OF_RESPONSE_TO_BIOTIC_STIMULUS	GO_REGULATION_OF_RESPONSE_TO_BIOTIC_STIMULUS		165	-0.484291	-1.95746	0	0.00114242	0.593	1176	tags=20%, list=8%, signal=22%
575	KRAS.600.LUNG.BREAST_UP.V1_UP	KRAS.600.LUNG.BREAST_UP.V1_UP		130	-0.50135	-1.95671	0	0.00115352	0.597	1454	tags=25%, list=10%, signal=28%
576	GO_RELEASE_OF_CYTOCHROME_C_FROM_MITOCHONDRIA	GO_RELEASE_OF_CYTOCHROME_C_FROM_MITOCHONDRIA		17	-0.747413	-1.95549	0	0.00116828	0.603	1305	tags=47%, list=9%, signal=52%
577	GO_REGULATION_OF_LYMPHOCYTE_MEDIATED_IMMUNITY	GO_REGULATION_OF_LYMPHOCYTE_MEDIATED_IMMUNITY		78	-0.548933	-1.9552	0	0.00117444	0.607	1483	tags=27%, list=10%, signal=30%
578	AMIT_SERUM_RESPONSE_240_MCF10A	AMIT_SERUM_RESPONSE_240_MCF10A		43	-0.620554	-1.95506	0	0.00117576	0.608	2223	tags=42%, list=16%, signal=49%
579	GO_PROTEIN_HETEROOLIGOMERIZATION	GO_PROTEIN_HETEROOLIGOMERIZATION		68	-0.55793	-1.95493	0	0.00117709	0.609	1248	tags=19%, list=9%, signal=21%
580	GO_ALPHA_BETA_T_CELL_DIFFERENTIATION	GO_ALPHA_BETA_T_CELL_DIFFERENTIATION		34	-0.626874	-1.9532	0	0.00120386	0.621	1127	tags=38%, list=8%, signal=41%
581	GO_POSITIVE_REGULATION_OF_INTRINSIC_APOPTOTIC_SIGNALING_PATHWAY	GO_POSITIVE_REGULATION_OF_INTRINSIC_APOPTOTIC_SIGNALING_PATHWAY		46	-0.599865	-1.95231	0	0.00121127	0.624	1285	tags=26%, list=9%, signal=29%
582	GO_LEUKOCYTE_ACTIVATION	GO_LEUKOCYTE_ACTIVATION		305	-0.452974	-1.95048	0	0.00124629	0.636	1285	tags=25%, list=9%, signal=26%
583	GO_POSITIVE_REGULATION_OF_STRESS_ACTIVATED_PROTEIN_KINASE_SIGNALING_CASCADE	GO_POSITIVE_REGULATION_OF_STRESS_ACTIVATED_PROTEIN_KINASE_SIGNALING_CASCADE		98	-0.520158	-1.94968	0	0.00125596	0.641	1176	tags=26%, list=8%, signal=28%
584	PID_IL2_PI3K_PATHWAY	PID_IL2_PI3K_PATHWAY		28	-0.650306	-1.94923	0	0.00127157	0.646	1198	tags=36%, list=8%, signal=39%
585	GROSS_ELK3_TARGETS_DN	GROSS_ELK3_TARGETS_DN		25	-0.697236	-1.94897	0	0.00127162	0.646	631	tags=28%, list=4%, signal=29%
586	GO_POSITIVE_REGULATION_OF_PROTEIN_SECRETION	GO_POSITIVE_REGULATION_OF_PROTEIN_SECRETION		140	-0.499519	-1.94759	0	0.00129308	0.654	1102	tags=23%, list=8%, signal=25%
587	KRIGE_AMINO_ACID_DEPRIVATION	KRIGE_AMINO_ACID_DEPRIVATION		27	-0.669132	-1.94726	0.00206186	0.00129547	0.655	2014	tags=44%, list=14%, signal=52%
588	HALLMARK_KRAS_SIGNALING_UP	HALLMARK_KRAS_SIGNALING_UP		145	-0.494156	-1.9456	0	0.00132154	0.664	1454	tags=27%, list=10%, signal=30%
589	OLSSON_E2F3_TARGETS_UP	OLSSON_E2F3_TARGETS_UP		20	-0.707453	-1.94357	0	0.00135554	0.679	803	tags=25%, list=6%, signal=26%
590	GO_REGULATION_OF_ANTIGEN_PROCESSING_AND_PRESENTATION	GO_REGULATION_OF_ANTIGEN_PROCESSING_AND_PRESENTATION		17	-0.745129	-1.94309	0.00215054	0.00136486	0.682	559	tags=35%, list=4%, signal=37%
591	GO_CELL_SURFACE	GO_CELL_SURFACE		447	-0.433513	-1.9418	0	0.00138808	0.688	1566	tags=19%, list=11%, signal=20%
592	GAVIN_FOXP3_TARGETS_CLUSTER_T4	GAVIN_FOXP3_TARGETS_CLUSTER_T4		75	-0.549186	-1.94027	0	0.0014149	0.693	1095	tags=23%, list=8%, signal=24%
593	GO_CYTOKINE_PRODUCTION	GO_CYTOKINE_PRODUCTION		87	-0.52531	-1.93837	0	0.00146025	0.704	2439	tags=39%, list=17%, signal=47%
594	GNF2_PTX3	GNF2_PTX3		24	-0.656627	-1.93567	0	0.00151984	0.717	1194	tags=29%, list=8%, signal=32%
595	GO_NEGATIVE_REGULATION_OF_PEPTIDASE_ACTIVITY	GO_NEGATIVE_REGULATION_OF_PEPTIDASE_ACTIVITY		136	-0.491417	-1.9356	0	0.00152079	0.717	2621	tags=34%, list=18%, signal=41%
596	KEGG_CELL_ADHESION_MOLECULES_CAMS	KEGG_CELL_ADHESION_MOLECULES_CAMS		82	-0.539081	-1.93552	0	0.00152289	0.719	843	tags=18%, list=6%, signal=19%
597	GO_NIK_NF_KAPPAB_SIGNALING	GO_NIK_NF_KAPPAB_SIGNALING		75	-0.5375	-1.9349	0	0.00153895	0.724	2108	tags=28%, list=15%, signal=33%
598	GO_MYELOID_DENDRITIC_CELL_ACTIVATION	GO_MYELOID_DENDRITIC_CELL_ACTIVATION		19	-0.716298	-1.93466	0	0.0015422	0.727	940	tags=42%, list=7%, signal=45%
599	GO_TOLL_LIKE_RECEPTOR_SIGNALING_PATHWAY	GO_TOLL_LIKE_RECEPTOR_SIGNALING_PATHWAY		73	-0.544867	-1.93323	0	0.00156093	0.735	925	tags=25%, list=7%, signal=26%
600	HOUSTIS_ROS	HOUSTIS_ROS		30	-0.64769	-1.93324	0.00199203	0.00156232	0.735	1688	tags=33%, list=12%, signal=38%
601	REACTOME_TRAF6_MEDIATED_NFKB_ACTIVATION	REACTOME_TRAF6_MEDIATED_NFKB_ACTIVATION		16	-0.748885	-1.93326	0.00428265	0.00156372	0.735	721	tags=44%, list=5%, signal=46%
602	DORSEY_GAB2_TARGETS	DORSEY_GAB2_TARGETS		21	-0.699677	-1.93311	0	0.00156533	0.737	1221	tags=43%, list=9%, signal=47%
603	GO_NEGATIVE_REGULATION_OF_NF_KAPPAB_IMPORT_INTO_NUCLEUS	GO_NEGATIVE_REGULATION_OF_NF_KAPPAB_IMPORT_INTO_NUCLEUS		15	-0.786292	-1.93243	0	0.00158015	0.739	773	tags=40%, list=5%, signal=42%
604	KEGG_PROTEASOME	KEGG_PROTEASOME		41	-0.597668	-1.93165	0	0.0016006	0.744	4015	tags=59%, list=28%, signal=81%
605	GOZGIT_ESR1_TARGETS_DN	GOZGIT_ESR1_TARGETS_DN		487	-0.425996	-1.92995	0	0.00162913	0.753	1949	tags=25%, list=14%, signal=28%
606	DIAZ_CHRONIC_MEYLOGENOUS_LEUKEMIA_DN	DIAZ_CHRONIC_MEYLOGENOUS_LEUKEMIA_DN		100	-0.520358	-1.92799	0	0.00167202	0.762	826	tags=17%, list=6%, signal=18%
607	GO_NEGATIVE_REGULATION_OF_RESPONSE_TO_EXTERNAL_STIMULUS	GO_NEGATIVE_REGULATION_OF_RESPONSE_TO_EXTERNAL_STIMULUS		179	-0.478441	-1.92764	0	0.00168315	0.765	1577	tags=21%, list=11%, signal=24%
608	ALK_DN.V1_UP	ALK_DN.V1_UP		79	-0.538951	-1.92671	0	0.00170997	0.77	2014	tags=38%, list=14%, signal=44%
609	SU_THYMUS	SU_THYMUS		16	-0.75803	-1.92595	0	0.00172755	0.777	832	tags=50%, list=6%, signal=53%
610	KEGG_LEISHMANIA_INFECTION	KEGG_LEISHMANIA_INFECTION		58	-0.562691	-1.92511	0	0.00174737	0.783	1189	tags=31%, list=8%, signal=34%
611	GO_NEGATIVE_REGULATION_OF_APOPTOTIC_SIGNALING_PATHWAY	GO_NEGATIVE_REGULATION_OF_APOPTOTIC_SIGNALING_PATHWAY		152	-0.483092	-1.92438	0	0.00176862	0.787	1564	tags=26%, list=11%, signal=29%
612	PID_AMB2_NEUTROPHILS_PATHWAY	PID_AMB2_NEUTROPHILS_PATHWAY		27	-0.66047	-1.92207	0	0.00183772	0.802	878	tags=30%, list=6%, signal=32%
613	GO_CELL_ACTIVATION	GO_CELL_ACTIVATION		409	-0.43367	-1.92186	0	0.00184292	0.803	1285	tags=22%, list=9%, signal=23%
614	BOYAULT_LIVER_CANCER_SUBCLASS_G5_DN	BOYAULT_LIVER_CANCER_SUBCLASS_G5_DN		22	-0.686409	-1.92133	0.00395257	0.00185494	0.807	809	tags=36%, list=6%, signal=39%
615	GO_NEGATIVE_REGULATION_OF_INNATE_IMMUNE_RESPONSE	GO_NEGATIVE_REGULATION_OF_INNATE_IMMUNE_RESPONSE		29	-0.647643	-1.92029	0	0.00187551	0.811	1765	tags=41%, list=12%, signal=47%
616	REACTOME_VIF_MEDIATED_DEGRADATION_OF_APOBEC3G	REACTOME_VIF_MEDIATED_DEGRADATION_OF_APOBEC3G		47	-0.590947	-1.91933	0	0.00190671	0.815	2108	tags=30%, list=15%, signal=35%
617	REACTOME_ER_PHAGOSOME_PATHWAY	REACTOME_ER_PHAGOSOME_PATHWAY		56	-0.567795	-1.9179	0	0.0019368	0.822	4072	tags=61%, list=29%, signal=85%
618	KOKKINAKIS_METHIONINE_DEPRIVATION_48HR_UP	KOKKINAKIS_METHIONINE_DEPRIVATION_48HR_UP		117	-0.499026	-1.91733	0	0.00194361	0.825	1208	tags=26%, list=9%, signal=29%
619	GO_REGULATION_OF_CELL_KILLING	GO_REGULATION_OF_CELL_KILLING		44	-0.593528	-1.91588	0	0.00197345	0.827	1104	tags=27%, list=8%, signal=29%
620	GO_REGULATION_OF_PROTEIN_INSERTION_INTO_MITOCHONDRIAL_MEMBRANE_INVOLVED_IN_APOPTOTIC_SIGNALING_PATHWAY	GO_REGULATION_OF_PROTEIN_INSERTION_INTO_MITOCHONDRIAL_MEMBRANE_INVOLVED_IN_APOPTOTIC_SIGNALING_PATHWAY		28	-0.646764	-1.91554	0.00205339	0.00198132	0.828	1044	tags=29%, list=7%, signal=31%
621	LEE_LIVER_CANCER_MYC_TGFA_UP	LEE_LIVER_CANCER_MYC_TGFA_UP		46	-0.585436	-1.91461	0	0.0020043	0.83	820	tags=17%, list=6%, signal=18%
622	GO_POSITIVE_REGULATION_OF_PROTEIN_IMPORT	GO_POSITIVE_REGULATION_OF_PROTEIN_IMPORT		77	-0.536507	-1.91312	0	0.00203896	0.836	1304	tags=30%, list=9%, signal=33%
623	GO_RESPONSE_TO_REACTIVE_OXYGEN_SPECIES	GO_RESPONSE_TO_REACTIVE_OXYGEN_SPECIES		147	-0.491921	-1.91317	0	0.00204072	0.836	1234	tags=26%, list=9%, signal=28%
624	GO_REGULATION_OF_TYROSINE_PHOSPHORYLATION_OF_STAT3_PROTEIN	GO_REGULATION_OF_TYROSINE_PHOSPHORYLATION_OF_STAT3_PROTEIN		30	-0.644329	-1.91222	0.00199203	0.00205581	0.839	1240	tags=43%, list=9%, signal=47%
625	REACTOME_IL_2_SIGNALING	REACTOME_IL_2_SIGNALING		35	-0.62162	-1.91213	0.00397614	0.00205628	0.839	1099	tags=31%, list=8%, signal=34%
626	WEINMANN_ADAPTATION_TO_HYPOXIA_DN	WEINMANN_ADAPTATION_TO_HYPOXIA_DN		31	-0.629517	-1.91237	0.00204918	0.00205936	0.839	784	tags=32%, list=6%, signal=34%
627	IZADPANAH_STEM_CELL_ADIPOSE_VS_BONE_UP	IZADPANAH_STEM_CELL_ADIPOSE_VS_BONE_UP		98	-0.514503	-1.91182	0	0.00206678	0.839	1514	tags=33%, list=11%, signal=36%
628	GO_POSITIVE_REGULATION_OF_CELL_DEATH	GO_POSITIVE_REGULATION_OF_CELL_DEATH		462	-0.424751	-1.91139	0	0.00207102	0.84	1567	tags=21%, list=11%, signal=23%
629	BROWNE_HCMV_INFECTION_12HR_UP	BROWNE_HCMV_INFECTION_12HR_UP		82	-0.524603	-1.9113	0	0.00207258	0.84	944	tags=23%, list=7%, signal=25%
630	GO_RESPONSE_TO_KETONE	GO_RESPONSE_TO_KETONE		124	-0.494282	-1.91127	0	0.00207304	0.84	1387	tags=23%, list=10%, signal=26%
631	KAECH_NAIVE_VS_MEMORY_CD8_TCELL_DN	KAECH_NAIVE_VS_MEMORY_CD8_TCELL_DN		171	-0.474422	-1.91069	0	0.00208501	0.842	1293	tags=22%, list=9%, signal=24%
632	SESTO_RESPONSE_TO_UV_C3	SESTO_RESPONSE_TO_UV_C3		19	-0.729975	-1.91056	0	0.00208548	0.842	1445	tags=58%, list=10%, signal=64%
633	GO_PROTEASE_BINDING	GO_PROTEASE_BINDING		84	-0.529162	-1.91012	0	0.00209633	0.845	2277	tags=30%, list=16%, signal=35%
634	GO_NEGATIVE_REGULATION_OF_GROWTH	GO_NEGATIVE_REGULATION_OF_GROWTH		160	-0.475403	-1.90947	0	0.00210751	0.849	1818	tags=28%, list=13%, signal=32%
635	GO_NEGATIVE_REGULATION_OF_T_CELL_DIFFERENTIATION	GO_NEGATIVE_REGULATION_OF_T_CELL_DIFFERENTIATION		19	-0.71655	-1.90944	0	0.00210793	0.85	1127	tags=37%, list=8%, signal=40%
636	KEGG_TYPE_I_DIABETES_MELLITUS	KEGG_TYPE_I_DIABETES_MELLITUS		34	-0.614689	-1.90894	0	0.00211683	0.852	2083	tags=41%, list=15%, signal=48%
637	CROONQUIST_NRAS_SIGNALING_UP	CROONQUIST_NRAS_SIGNALING_UP		33	-0.627896	-1.90903	0	0.00211711	0.851	1321	tags=30%, list=9%, signal=33%
638	MAGRANGEAS_MULTIPLE_MYELOMA_IGLL_VS_IGLK_UP	MAGRANGEAS_MULTIPLE_MYELOMA_IGLL_VS_IGLK_UP		32	-0.63186	-1.90849	0	0.00212313	0.854	916	tags=28%, list=6%, signal=30%
639	PID_IL2_1PATHWAY	PID_IL2_1PATHWAY		51	-0.570522	-1.90831	0	0.00212786	0.854	1099	tags=33%, list=8%, signal=36%
640	BIOCARTA_RELA_PATHWAY	BIOCARTA_RELA_PATHWAY		16	-0.745463	-1.90765	0	0.00214689	0.858	878	tags=44%, list=6%, signal=47%
641	REACTOME_CROSS_PRESENTATION_OF_SOLUBLE_EXOGENOUS_ANTIGENS_ENDOSOMES	REACTOME_CROSS_PRESENTATION_OF_SOLUBLE_EXOGENOUS_ANTIGENS_ENDOSOMES		42	-0.584742	-1.90594	0	0.00217906	0.864	4071	tags=57%, list=29%, signal=80%
642	TONKS_TARGETS_OF_RUNX1_RUNX1T1_FUSION_ERYTHROCYTE_UP	TONKS_TARGETS_OF_RUNX1_RUNX1T1_FUSION_ERYTHROCYTE_UP		134	-0.482187	-1.90197	0	0.00226132	0.881	1427	tags=27%, list=10%, signal=30%
643	LI_INDUCED_T_TO_NATURAL_KILLER_UP	LI_INDUCED_T_TO_NATURAL_KILLER_UP		229	-0.452753	-1.90146	0	0.0022748	0.882	1454	tags=24%, list=10%, signal=27%
644	GRUETZMANN_PANCREATIC_CANCER_UP	GRUETZMANN_PANCREATIC_CANCER_UP		290	-0.443553	-1.90111	0	0.00229032	0.882	1446	tags=17%, list=10%, signal=18%
645	GO_MODIFICATION_BY_SYMBIONT_OF_HOST_MORPHOLOGY_OR_PHYSIOLOGY	GO_MODIFICATION_BY_SYMBIONT_OF_HOST_MORPHOLOGY_OR_PHYSIOLOGY		38	-0.594661	-1.89965	0	0.00232557	0.883	201	tags=16%, list=1%, signal=16%
646	GO_T_CELL_HOMEOSTASIS	GO_T_CELL_HOMEOSTASIS		24	-0.660349	-1.89902	0	0.00234728	0.885	1127	tags=33%, list=8%, signal=36%
647	REACTOME_IL_RECEPTOR_SHC_SIGNALING	REACTOME_IL_RECEPTOR_SHC_SIGNALING		22	-0.666932	-1.89759	0.00194932	0.00239075	0.89	1099	tags=36%, list=8%, signal=39%
648	CHEN_LVAD_SUPPORT_OF_FAILING_HEART_UP	CHEN_LVAD_SUPPORT_OF_FAILING_HEART_UP		78	-0.524952	-1.89689	0	0.00240287	0.892	1884	tags=44%, list=13%, signal=50%
649	HOFFMANN_PRE_BI_TO_LARGE_PRE_BII_LYMPHOCYTE_DN	HOFFMANN_PRE_BI_TO_LARGE_PRE_BII_LYMPHOCYTE_DN		57	-0.558806	-1.89694	0	0.00240486	0.892	952	tags=19%, list=7%, signal=21%
650	GO_RESPONSE_TO_CORTICOSTEROID	GO_RESPONSE_TO_CORTICOSTEROID		110	-0.498322	-1.89668	0	0.00241053	0.894	1097	tags=21%, list=8%, signal=22%
651	GO_REGULATION_OF_LEUKOCYTE_MEDIATED_CYTOTOXICITY	GO_REGULATION_OF_LEUKOCYTE_MEDIATED_CYTOTOXICITY		38	-0.595966	-1.89618	0	0.00242044	0.894	2621	tags=47%, list=18%, signal=58%
652	LIU_TARGETS_OF_VMYB_VS_CMYB_DN	LIU_TARGETS_OF_VMYB_VS_CMYB_DN		35	-0.623816	-1.89504	0.00206612	0.00245178	0.895	1565	tags=31%, list=11%, signal=35%
653	GO_T_CELL_DIFFERENTIATION_INVOLVED_IN_IMMUNE_RESPONSE	GO_T_CELL_DIFFERENTIATION_INVOLVED_IN_IMMUNE_RESPONSE		24	-0.670869	-1.89395	0.00214592	0.00247761	0.9	1841	tags=58%, list=13%, signal=67%
654	GO_POSITIVE_REGULATION_OF_ALPHA_BETA_T_CELL_ACTIVATION	GO_POSITIVE_REGULATION_OF_ALPHA_BETA_T_CELL_ACTIVATION		38	-0.61013	-1.89339	0	0.00249076	0.901	1104	tags=34%, list=8%, signal=37%
655	MCBRYAN_PUBERTAL_TGFB1_TARGETS_UP	MCBRYAN_PUBERTAL_TGFB1_TARGETS_UP		139	-0.476474	-1.89304	0	0.00250359	0.902	1596	tags=27%, list=11%, signal=30%
656	BOYLAN_MULTIPLE_MYELOMA_PCA1_UP	BOYLAN_MULTIPLE_MYELOMA_PCA1_UP		73	-0.534295	-1.89221	0	0.00253226	0.904	1165	tags=25%, list=8%, signal=27%
657	SCHEIDEREIT_IKK_INTERACTING_PROTEINS	SCHEIDEREIT_IKK_INTERACTING_PROTEINS		46	-0.578929	-1.89185	0	0.00254819	0.905	625	tags=26%, list=4%, signal=27%
658	NIELSEN_GIST_VS_SYNOVIAL_SARCOMA_DN	NIELSEN_GIST_VS_SYNOVIAL_SARCOMA_DN		15	-0.742708	-1.89105	0	0.00257157	0.907	1096	tags=33%, list=8%, signal=36%
659	GO_REGULATION_OF_T_CELL_MEDIATED_CYTOTOXICITY	GO_REGULATION_OF_T_CELL_MEDIATED_CYTOTOXICITY		20	-0.683388	-1.89107	0	0.0025726	0.907	1104	tags=30%, list=8%, signal=32%
660	LEI_MYB_TARGETS	LEI_MYB_TARGETS		254	-0.442941	-1.89029	0	0.00258321	0.909	1795	tags=21%, list=13%, signal=24%
661	BOSCO_ALLERGEN_INDUCED_TH2_ASSOCIATED_MODULE	BOSCO_ALLERGEN_INDUCED_TH2_ASSOCIATED_MODULE		115	-0.49948	-1.88997	0	0.00259161	0.91	1269	tags=29%, list=9%, signal=31%
662	CHR1Q24	CHR1Q24		25	-0.650335	-1.88957	0.00201207	0.00259373	0.91	808	tags=28%, list=6%, signal=30%
663	BIOCARTA_IL7_PATHWAY	BIOCARTA_IL7_PATHWAY		17	-0.733036	-1.88964	0	0.00259479	0.91	1099	tags=53%, list=8%, signal=57%
664	FUJII_YBX1_TARGETS_UP	FUJII_YBX1_TARGETS_UP		33	-0.630242	-1.8891	0	0.00259896	0.911	2036	tags=36%, list=14%, signal=42%
665	GO_RESPONSE_TO_ESTROGEN	GO_RESPONSE_TO_ESTROGEN		142	-0.478307	-1.88792	0	0.00264505	0.916	1082	tags=20%, list=8%, signal=21%
666	GO_POSITIVE_REGULATION_OF_ACTIVATED_T_CELL_PROLIFERATION	GO_POSITIVE_REGULATION_OF_ACTIVATED_T_CELL_PROLIFERATION		20	-0.683283	-1.88798	0	0.00264509	0.916	1795	tags=50%, list=13%, signal=57%
667	GO_NEGATIVE_REGULATION_OF_PROTEIN_SECRETION	GO_NEGATIVE_REGULATION_OF_PROTEIN_SECRETION		63	-0.551584	-1.88689	0	0.00266475	0.919	1152	tags=22%, list=8%, signal=24%
668	HAHTOLA_SEZARY_SYNDROM_DN	HAHTOLA_SEZARY_SYNDROM_DN		29	-0.634611	-1.88721	0	0.00266596	0.918	890	tags=31%, list=6%, signal=33%
669	GO_POSITIVE_REGULATION_OF_B_CELL_ACTIVATION	GO_POSITIVE_REGULATION_OF_B_CELL_ACTIVATION		53	-0.567282	-1.88706	0	0.00266695	0.918	1147	tags=30%, list=8%, signal=33%
670	GO_RESPONSE_TO_ALCOHOL	GO_RESPONSE_TO_ALCOHOL		241	-0.447824	-1.88665	0	0.00267304	0.919	1426	tags=22%, list=10%, signal=24%
671	REACTOME_DOWNSTREAM_SIGNALING_EVENTS_OF_B_CELL_RECEPTOR_BCR	REACTOME_DOWNSTREAM_SIGNALING_EVENTS_OF_B_CELL_RECEPTOR_BCR		81	-0.530193	-1.886	0	0.00268646	0.922	2108	tags=32%, list=15%, signal=37%
672	GO_CELLULAR_RESPONSE_TO_VIRUS	GO_CELLULAR_RESPONSE_TO_VIRUS		19	-0.702425	-1.88492	0	0.00272584	0.925	1198	tags=42%, list=8%, signal=46%
673	VALK_AML_CLUSTER_2	VALK_AML_CLUSTER_2		23	-0.69679	-1.88456	0	0.00272873	0.925	988	tags=35%, list=7%, signal=37%
674	TSAI_RESPONSE_TO_RADIATION_THERAPY	TSAI_RESPONSE_TO_RADIATION_THERAPY		28	-0.657192	-1.8847	0.00204918	0.00272884	0.925	1437	tags=50%, list=10%, signal=56%
675	REACTOME_REGULATION_OF_ORNITHINE_DECARBOXYLASE_ODC	REACTOME_REGULATION_OF_ORNITHINE_DECARBOXYLASE_ODC		46	-0.582871	-1.88406	0	0.00275255	0.927	4071	tags=57%, list=29%, signal=79%
676	GO_ADAPTIVE_IMMUNE_RESPONSE	GO_ADAPTIVE_IMMUNE_RESPONSE		182	-0.470033	-1.88384	0	0.00276073	0.927	1600	tags=26%, list=11%, signal=29%
677	GO_REGULATION_OF_RESPONSE_TO_INTERFERON_GAMMA	GO_REGULATION_OF_RESPONSE_TO_INTERFERON_GAMMA		18	-0.708991	-1.88323	0.00581395	0.00278203	0.93	1099	tags=44%, list=8%, signal=48%
678	GO_POSITIVE_REGULATION_OF_TUMOR_NECROSIS_FACTOR_SUPERFAMILY_CYTOKINE_PRODUCTION	GO_POSITIVE_REGULATION_OF_TUMOR_NECROSIS_FACTOR_SUPERFAMILY_CYTOKINE_PRODUCTION		47	-0.579764	-1.88326	0	0.0027832	0.93	1104	tags=26%, list=8%, signal=28%
679	SENGUPTA_NASOPHARYNGEAL_CARCINOMA_WITH_LMP1_UP	SENGUPTA_NASOPHARYNGEAL_CARCINOMA_WITH_LMP1_UP		294	-0.437683	-1.88183	0	0.00283808	0.936	1604	tags=21%, list=11%, signal=23%
680	MITSIADES_RESPONSE_TO_APLIDIN_UP	MITSIADES_RESPONSE_TO_APLIDIN_UP		341	-0.430657	-1.87876	0	0.00295635	0.942	1524	tags=22%, list=11%, signal=24%
681	DELPUECH_FOXO3_TARGETS_UP	DELPUECH_FOXO3_TARGETS_UP		57	-0.543502	-1.87776	0	0.00298647	0.944	1384	tags=28%, list=10%, signal=31%
682	DANG_REGULATED_BY_MYC_DN	DANG_REGULATED_BY_MYC_DN		203	-0.45631	-1.87747	0	0.00299949	0.944	1514	tags=21%, list=11%, signal=23%
683	PID_NFKAPPAB_CANONICAL_PATHWAY	PID_NFKAPPAB_CANONICAL_PATHWAY		21	-0.678122	-1.87709	0	0.00300808	0.945	878	tags=38%, list=6%, signal=41%
684	GO_REGULATION_OF_PEPTIDE_TRANSPORT	GO_REGULATION_OF_PEPTIDE_TRANSPORT		161	-0.46384	-1.87677	0	0.00302003	0.945	1679	tags=25%, list=12%, signal=28%
685	ROZANOV_MMP14_TARGETS_UP	ROZANOV_MMP14_TARGETS_UP		190	-0.455643	-1.87656	0	0.00302381	0.945	1502	tags=24%, list=11%, signal=27%
686	GO_RESPONSE_TO_HEAT	GO_RESPONSE_TO_HEAT		63	-0.537381	-1.87609	0	0.0030347	0.945	1514	tags=29%, list=11%, signal=32%
687	GO_MODIFICATION_OF_MORPHOLOGY_OR_PHYSIOLOGY_OF_OTHER_ORGANISM	GO_MODIFICATION_OF_MORPHOLOGY_OR_PHYSIOLOGY_OF_OTHER_ORGANISM		71	-0.536452	-1.87531	0	0.00305673	0.948	201	tags=13%, list=1%, signal=13%
688	REACTOME_TAK1_ACTIVATES_NFKB_BY_PHOSPHORYLATION_AND_ACTIVATION_OF_IKKS_COMPLEX	REACTOME_TAK1_ACTIVATES_NFKB_BY_PHOSPHORYLATION_AND_ACTIVATION_OF_IKKS_COMPLEX		15	-0.739229	-1.87531	0.00215054	0.00305709	0.947	721	tags=40%, list=5%, signal=42%
689	GAVIN_FOXP3_TARGETS_CLUSTER_P4	GAVIN_FOXP3_TARGETS_CLUSTER_P4		69	-0.532884	-1.87385	0	0.00311144	0.949	1087	tags=25%, list=8%, signal=27%
690	AKT_UP.V1_UP	AKT_UP.V1_UP		109	-0.497843	-1.87391	0	0.00311185	0.949	1559	tags=26%, list=11%, signal=29%
691	ONDER_CDH1_TARGETS_3_DN	ONDER_CDH1_TARGETS_3_DN		31	-0.624209	-1.87276	0.00409836	0.0031412	0.95	1439	tags=42%, list=10%, signal=47%
692	SENESE_HDAC3_TARGETS_UP	SENESE_HDAC3_TARGETS_UP		396	-0.4224	-1.87237	0	0.00315902	0.951	1746	tags=22%, list=12%, signal=24%
693	SMID_BREAST_CANCER_RELAPSE_IN_BONE_DN	SMID_BREAST_CANCER_RELAPSE_IN_BONE_DN		189	-0.459814	-1.87215	0	0.00316272	0.951	1652	tags=22%, list=12%, signal=25%
694	HUANG_DASATINIB_RESISTANCE_UP	HUANG_DASATINIB_RESISTANCE_UP		67	-0.532667	-1.87218	0	0.00316318	0.951	1061	tags=27%, list=7%, signal=29%
695	GO_REGULATION_OF_ALPHA_BETA_T_CELL_PROLIFERATION	GO_REGULATION_OF_ALPHA_BETA_T_CELL_PROLIFERATION		18	-0.71389	-1.87225	0	0.00316463	0.951	477	tags=33%, list=3%, signal=34%
696	STEGER_ADIPOGENESIS_DN	STEGER_ADIPOGENESIS_DN		16	-0.723065	-1.87124	0.00211416	0.00319363	0.952	847	tags=25%, list=6%, signal=27%
697	DAZARD_UV_RESPONSE_CLUSTER_G24	DAZARD_UV_RESPONSE_CLUSTER_G24		21	-0.686945	-1.87036	0	0.00322947	0.953	1366	tags=33%, list=10%, signal=37%
698	REACTOME_IL_3_5_AND_GM_CSF_SIGNALING	REACTOME_IL_3_5_AND_GM_CSF_SIGNALING		37	-0.600599	-1.86943	0	0.00325619	0.953	1099	tags=32%, list=8%, signal=35%
699	GO_GLAND_MORPHOGENESIS	GO_GLAND_MORPHOGENESIS		60	-0.548129	-1.86851	0	0.00329336	0.953	1251	tags=22%, list=9%, signal=24%
700	GO_NEGATIVE_REGULATION_OF_EPITHELIAL_CELL_APOPTOTIC_PROCESS	GO_NEGATIVE_REGULATION_OF_EPITHELIAL_CELL_APOPTOTIC_PROCESS		20	-0.695339	-1.86812	0	0.00329673	0.953	999	tags=40%, list=7%, signal=43%
701	TENEDINI_MEGAKARYOCYTE_MARKERS	TENEDINI_MEGAKARYOCYTE_MARKERS		51	-0.559844	-1.86814	0.00192678	0.00329928	0.953	832	tags=31%, list=6%, signal=33%
702	AZARE_NEOPLASTIC_TRANSFORMATION_BY_STAT3_UP	AZARE_NEOPLASTIC_TRANSFORMATION_BY_STAT3_UP		95	-0.496045	-1.86546	0	0.00340102	0.956	1723	tags=28%, list=12%, signal=32%
703	DAZARD_RESPONSE_TO_UV_SCC_UP	DAZARD_RESPONSE_TO_UV_SCC_UP		108	-0.492796	-1.86518	0	0.00340339	0.956	1055	tags=17%, list=7%, signal=18%
704	GO_INTRINSIC_APOPTOTIC_SIGNALING_PATHWAY_IN_RESPONSE_TO_ENDOPLASMIC_RETICULUM_STRESS	GO_INTRINSIC_APOPTOTIC_SIGNALING_PATHWAY_IN_RESPONSE_TO_ENDOPLASMIC_RETICULUM_STRESS		23	-0.646468	-1.86504	0.0043384	0.00340478	0.957	2225	tags=52%, list=16%, signal=62%
705	GO_T_HELPER_1_TYPE_IMMUNE_RESPONSE	GO_T_HELPER_1_TYPE_IMMUNE_RESPONSE		18	-0.711893	-1.86353	0	0.00346533	0.961	1104	tags=39%, list=8%, signal=42%
706	GO_HYDROLASE_ACTIVITY_ACTING_ON_CARBON_NITROGEN_BUT_NOT_PEPTIDE_BONDS_IN_CYCLIC_AMIDINES	GO_HYDROLASE_ACTIVITY_ACTING_ON_CARBON_NITROGEN_BUT_NOT_PEPTIDE_BONDS_IN_CYCLIC_AMIDINES		27	-0.638965	-1.86344	0	0.00346868	0.962	1573	tags=33%, list=11%, signal=37%
707	GO_REGULATION_OF_NUCLEOCYTOPLASMIC_TRANSPORT	GO_REGULATION_OF_NUCLEOCYTOPLASMIC_TRANSPORT		177	-0.463616	-1.86187	0	0.00354981	0.963	1446	tags=27%, list=10%, signal=29%
708	GO_LEUKOCYTE_HOMEOSTASIS	GO_LEUKOCYTE_HOMEOSTASIS		41	-0.574248	-1.86018	0	0.00360357	0.964	1127	tags=32%, list=8%, signal=34%
709	GO_POSITIVE_REGULATION_OF_ALPHA_BETA_T_CELL_DIFFERENTIATION	GO_POSITIVE_REGULATION_OF_ALPHA_BETA_T_CELL_DIFFERENTIATION		27	-0.646606	-1.8599	0	0.00361366	0.965	1104	tags=41%, list=8%, signal=44%
710	REACTOME_IL1_SIGNALING	REACTOME_IL1_SIGNALING		32	-0.621771	-1.85836	0	0.00368445	0.967	1000	tags=31%, list=7%, signal=34%
711	GO_REGULATION_OF_DEFENSE_RESPONSE_TO_VIRUS_BY_HOST	GO_REGULATION_OF_DEFENSE_RESPONSE_TO_VIRUS_BY_HOST		86	-0.504686	-1.85808	0.00198807	0.00369254	0.967	1176	tags=23%, list=8%, signal=25%
712	BIOCARTA_NTHI_PATHWAY	BIOCARTA_NTHI_PATHWAY		22	-0.665353	-1.85656	0	0.00376197	0.971	1013	tags=45%, list=7%, signal=49%
713	GO_NEGATIVE_REGULATION_OF_NF_KAPPAB_TRANSCRIPTION_FACTOR_ACTIVITY	GO_NEGATIVE_REGULATION_OF_NF_KAPPAB_TRANSCRIPTION_FACTOR_ACTIVITY		49	-0.552882	-1.85609	0	0.00378376	0.971	1393	tags=29%, list=10%, signal=32%
714	GO_POSITIVE_REGULATION_OF_LAMELLIPODIUM_ORGANIZATION	GO_POSITIVE_REGULATION_OF_LAMELLIPODIUM_ORGANIZATION		15	-0.724296	-1.85569	0	0.00380639	0.973	770	tags=27%, list=5%, signal=28%
715	GO_POSITIVE_REGULATION_OF_INTERLEUKIN_2_PRODUCTION	GO_POSITIVE_REGULATION_OF_INTERLEUKIN_2_PRODUCTION		25	-0.640694	-1.85497	0	0.00383874	0.975	1396	tags=32%, list=10%, signal=35%
716	GO_NUCLEOTIDE_BINDING_DOMAIN_LEUCINE_RICH_REPEAT_CONTAINING_RECEPTOR_SIGNALING_PATHWAY	GO_NUCLEOTIDE_BINDING_DOMAIN_LEUCINE_RICH_REPEAT_CONTAINING_RECEPTOR_SIGNALING_PATHWAY		22	-0.662778	-1.85456	0	0.00385153	0.975	1981	tags=45%, list=14%, signal=53%
717	RADMACHER_AML_PROGNOSIS	RADMACHER_AML_PROGNOSIS		57	-0.545246	-1.85422	0	0.00385651	0.975	2471	tags=37%, list=17%, signal=44%
718	GO_T_CELL_MEDIATED_IMMUNITY	GO_T_CELL_MEDIATED_IMMUNITY		23	-0.662516	-1.85391	0	0.00386531	0.977	1484	tags=39%, list=10%, signal=44%
719	GO_REGULATION_OF_MITOCHONDRIAL_OUTER_MEMBRANE_PERMEABILIZATION_INVOLVED_IN_APOPTOTIC_SIGNALING_PATHWAY	GO_REGULATION_OF_MITOCHONDRIAL_OUTER_MEMBRANE_PERMEABILIZATION_INVOLVED_IN_APOPTOTIC_SIGNALING_PATHWAY		37	-0.604827	-1.85355	0	0.00388383	0.978	1044	tags=24%, list=7%, signal=26%
720	BECKER_TAMOXIFEN_RESISTANCE_UP	BECKER_TAMOXIFEN_RESISTANCE_UP		41	-0.576249	-1.85328	0	0.00390137	0.978	514	tags=24%, list=4%, signal=25%
721	GO_POSITIVE_REGULATION_OF_LEUKOCYTE_DIFFERENTIATION	GO_POSITIVE_REGULATION_OF_LEUKOCYTE_DIFFERENTIATION		98	-0.494285	-1.85291	0	0.00391206	0.978	1228	tags=29%, list=9%, signal=31%
722	RUTELLA_RESPONSE_TO_HGF_VS_CSF2RB_AND_IL4_UP	RUTELLA_RESPONSE_TO_HGF_VS_CSF2RB_AND_IL4_UP		353	-0.422826	-1.85263	0	0.00391692	0.978	1340	tags=20%, list=9%, signal=22%
723	GO_REGULATION_OF_TUMOR_NECROSIS_FACTOR_MEDIATED_SIGNALING_PATHWAY	GO_REGULATION_OF_TUMOR_NECROSIS_FACTOR_MEDIATED_SIGNALING_PATHWAY		42	-0.592697	-1.85184	0	0.00394878	0.979	887	tags=31%, list=6%, signal=33%
724	GO_REGULATION_OF_INTERLEUKIN_2_PRODUCTION	GO_REGULATION_OF_INTERLEUKIN_2_PRODUCTION		33	-0.625486	-1.85169	0	0.00395062	0.979	1396	tags=30%, list=10%, signal=34%
725	DOUGLAS_BMI1_TARGETS_DN	DOUGLAS_BMI1_TARGETS_DN		235	-0.440315	-1.85146	0	0.0039535	0.979	949	tags=17%, list=7%, signal=17%
726	HUPER_BREAST_BASAL_VS_LUMINAL_UP	HUPER_BREAST_BASAL_VS_LUMINAL_UP		30	-0.621146	-1.84941	0	0.0040457	0.982	2342	tags=47%, list=17%, signal=56%
727	FRIDMAN_IMMORTALIZATION_DN	FRIDMAN_IMMORTALIZATION_DN		24	-0.643746	-1.8484	0.0019802	0.00410229	0.982	1092	tags=29%, list=8%, signal=32%
728	GO_POSITIVE_REGULATION_OF_CELL_PROLIFERATION	GO_POSITIVE_REGULATION_OF_CELL_PROLIFERATION		489	-0.410643	-1.84827	0	0.00411081	0.983	1566	tags=21%, list=11%, signal=23%
729	GO_POSITIVE_REGULATION_OF_MITOCHONDRIAL_OUTER_MEMBRANE_PERMEABILIZATION_INVOLVED_IN_APOPTOTIC_SIGNALING_PATHWAY	GO_POSITIVE_REGULATION_OF_MITOCHONDRIAL_OUTER_MEMBRANE_PERMEABILIZATION_INVOLVED_IN_APOPTOTIC_SIGNALING_PATHWAY		33	-0.592039	-1.84725	0	0.00417398	0.983	1044	tags=24%, list=7%, signal=26%
730	SENESE_HDAC1_AND_HDAC2_TARGETS_UP	SENESE_HDAC1_AND_HDAC2_TARGETS_UP		176	-0.454791	-1.84674	0	0.00420069	0.983	1262	tags=20%, list=9%, signal=22%
731	SAFFORD_T_LYMPHOCYTE_ANERGY	SAFFORD_T_LYMPHOCYTE_ANERGY		64	-0.527196	-1.8457	0	0.00423353	0.983	1361	tags=31%, list=10%, signal=34%
732	GO_HUMORAL_IMMUNE_RESPONSE	GO_HUMORAL_IMMUNE_RESPONSE		89	-0.506625	-1.84563	0	0.00423516	0.983	1765	tags=26%, list=12%, signal=29%
733	GO_LEUKOCYTE_PROLIFERATION	GO_LEUKOCYTE_PROLIFERATION		61	-0.544841	-1.84582	0	0.00423691	0.983	1228	tags=28%, list=9%, signal=30%
734	GAJATE_RESPONSE_TO_TRABECTEDIN_UP	GAJATE_RESPONSE_TO_TRABECTEDIN_UP		53	-0.546872	-1.84584	0	0.00423812	0.983	1082	tags=25%, list=8%, signal=26%
735	PTEN_DN.V1_UP	PTEN_DN.V1_UP		90	-0.504737	-1.84584	0	0.00424125	0.983	1546	tags=27%, list=11%, signal=30%
736	GO_POSITIVE_REGULATION_OF_NUCLEOCYTOPLASMIC_TRANSPORT	GO_POSITIVE_REGULATION_OF_NUCLEOCYTOPLASMIC_TRANSPORT		94	-0.492169	-1.84494	0	0.00426547	0.984	1304	tags=26%, list=9%, signal=28%
737	GO_NEGATIVE_REGULATION_OF_DEFENSE_RESPONSE_TO_VIRUS	GO_NEGATIVE_REGULATION_OF_DEFENSE_RESPONSE_TO_VIRUS		15	-0.726454	-1.84455	0.00642398	0.0042751	0.984	432	tags=27%, list=3%, signal=27%
738	GO_POSITIVE_REGULATION_OF_SECRETION	GO_POSITIVE_REGULATION_OF_SECRETION		224	-0.437399	-1.84396	0	0.00431194	0.985	1503	tags=21%, list=11%, signal=23%
739	IRF2_01	IRF2_01		80	-0.515798	-1.84344	0	0.00434102	0.985	1643	tags=26%, list=12%, signal=30%
740	KRIEG_KDM3A_TARGETS_NOT_HYPOXIA	KRIEG_KDM3A_TARGETS_NOT_HYPOXIA		146	-0.469788	-1.84334	0	0.00434354	0.985	1092	tags=17%, list=8%, signal=18%
741	SESTO_RESPONSE_TO_UV_C0	SESTO_RESPONSE_TO_UV_C0		92	-0.500518	-1.8431	0	0.00435173	0.985	1647	tags=24%, list=12%, signal=27%
742	GO_NEGATIVE_REGULATION_OF_ENDOTHELIAL_CELL_APOPTOTIC_PROCESS	GO_NEGATIVE_REGULATION_OF_ENDOTHELIAL_CELL_APOPTOTIC_PROCESS		15	-0.742276	-1.84271	0	0.00437318	0.985	999	tags=47%, list=7%, signal=50%
743	PEPPER_CHRONIC_LYMPHOCYTIC_LEUKEMIA_UP	PEPPER_CHRONIC_LYMPHOCYTIC_LEUKEMIA_UP		25	-0.648213	-1.84234	0.0020202	0.00439653	0.987	1028	tags=28%, list=7%, signal=30%
744	GO_CD4_POSITIVE_ALPHA_BETA_T_CELL_ACTIVATION	GO_CD4_POSITIVE_ALPHA_BETA_T_CELL_ACTIVATION		24	-0.647449	-1.84171	0	0.00441331	0.988	1127	tags=42%, list=8%, signal=45%
745	GO_REGULATION_OF_INTRACELLULAR_TRANSPORT	GO_REGULATION_OF_INTRACELLULAR_TRANSPORT		448	-0.411726	-1.8418	0	0.00441558	0.988	1707	tags=22%, list=12%, signal=24%
746	CORRE_MULTIPLE_MYELOMA_UP	CORRE_MULTIPLE_MYELOMA_UP		44	-0.566978	-1.84185	0.00397614	0.00441597	0.988	715	tags=18%, list=5%, signal=19%
747	FULCHER_INFLAMMATORY_RESPONSE_LECTIN_VS_LPS_UP	FULCHER_INFLAMMATORY_RESPONSE_LECTIN_VS_LPS_UP		468	-0.41009	-1.84113	0	0.00445263	0.99	1823	tags=23%, list=13%, signal=26%
748	KEGG_PRIMARY_IMMUNODEFICIENCY	KEGG_PRIMARY_IMMUNODEFICIENCY		24	-0.647966	-1.84088	0.00635593	0.0044626	0.991	1276	tags=33%, list=9%, signal=37%
749	GO_POSITIVE_REGULATION_OF_ESTABLISHMENT_OF_PROTEIN_LOCALIZATION	GO_POSITIVE_REGULATION_OF_ESTABLISHMENT_OF_PROTEIN_LOCALIZATION		359	-0.419586	-1.84053	0	0.00448621	0.991	1857	tags=23%, list=13%, signal=26%
750	DAZARD_RESPONSE_TO_UV_NHEK_UP	DAZARD_RESPONSE_TO_UV_NHEK_UP		188	-0.450403	-1.83899	0	0.00457184	0.992	1567	tags=20%, list=11%, signal=22%
751	SARRIO_EPITHELIAL_MESENCHYMAL_TRANSITION_DN	SARRIO_EPITHELIAL_MESENCHYMAL_TRANSITION_DN		117	-0.484546	-1.83833	0	0.00460325	0.992	1384	tags=29%, list=10%, signal=32%
752	GCAAGAC_MIR431	GCAAGAC_MIR431		29	-0.624717	-1.83598	0	0.00472656	0.994	2059	tags=38%, list=15%, signal=44%
753	BIOCARTA_BIOPEPTIDES_PATHWAY	BIOCARTA_BIOPEPTIDES_PATHWAY		34	-0.604077	-1.83486	0	0.00479178	0.995	951	tags=26%, list=7%, signal=28%
754	GO_MOLTING_CYCLE	GO_MOLTING_CYCLE		38	-0.580063	-1.83327	0	0.00487519	0.995	1833	tags=37%, list=13%, signal=42%
755	SAGIV_CD24_TARGETS_DN	SAGIV_CD24_TARGETS_DN		43	-0.572556	-1.83312	0	0.00488287	0.995	1573	tags=37%, list=11%, signal=42%
756	GO_RESPONSE_TO_ESTRADIOL	GO_RESPONSE_TO_ESTRADIOL		93	-0.49636	-1.83255	0	0.0049175	0.995	884	tags=20%, list=6%, signal=22%
757	GARGALOVIC_RESPONSE_TO_OXIDIZED_PHOSPHOLIPIDS_MAGENTA_UP	GARGALOVIC_RESPONSE_TO_OXIDIZED_PHOSPHOLIPIDS_MAGENTA_UP		22	-0.657974	-1.83231	0.00215054	0.00492603	0.996	1868	tags=59%, list=13%, signal=68%
758	LU_TUMOR_ANGIOGENESIS_UP	LU_TUMOR_ANGIOGENESIS_UP		21	-0.673052	-1.83201	0	0.00494505	0.996	1088	tags=38%, list=8%, signal=41%
759	GO_POSITIVE_REGULATION_OF_VASCULATURE_DEVELOPMENT	GO_POSITIVE_REGULATION_OF_VASCULATURE_DEVELOPMENT		86	-0.507021	-1.8313	0	0.00496037	0.996	1566	tags=34%, list=11%, signal=38%
760	PTEN_DN.V2_UP	PTEN_DN.V2_UP		87	-0.497832	-1.83109	0	0.00496792	0.996	1228	tags=24%, list=9%, signal=26%
761	ZHANG_PROLIFERATING_VS_QUIESCENT	ZHANG_PROLIFERATING_VS_QUIESCENT		45	-0.550879	-1.83093	0.00204499	0.00497377	0.996	757	tags=13%, list=5%, signal=14%
762	GO_RESPONSE_TO_VITAMIN	GO_RESPONSE_TO_VITAMIN		82	-0.505613	-1.83062	0	0.00497776	0.996	886	tags=17%, list=6%, signal=18%
763	GO_TUMOR_NECROSIS_FACTOR_RECEPTOR_BINDING	GO_TUMOR_NECROSIS_FACTOR_RECEPTOR_BINDING		24	-0.651291	-1.83013	0.00200803	0.00500652	0.996	952	tags=33%, list=7%, signal=36%
764	ST_INTERLEUKIN_4_PATHWAY	ST_INTERLEUKIN_4_PATHWAY		22	-0.652429	-1.82972	0	0.00501769	0.996	1099	tags=32%, list=8%, signal=34%
765	GO_RESPONSE_TO_OXIDATIVE_STRESS	GO_RESPONSE_TO_OXIDATIVE_STRESS		270	-0.431218	-1.82877	0	0.00506674	0.996	1759	tags=25%, list=12%, signal=28%
766	FALVELLA_SMOKERS_WITH_LUNG_CANCER	FALVELLA_SMOKERS_WITH_LUNG_CANCER		56	-0.544123	-1.82696	0.00389864	0.00516714	0.998	1160	tags=23%, list=8%, signal=25%
767	GO_NEGATIVE_REGULATION_OF_PROTEOLYSIS	GO_NEGATIVE_REGULATION_OF_PROTEOLYSIS		204	-0.442071	-1.82697	0	0.0051708	0.998	2621	tags=32%, list=18%, signal=39%
768	GO_CELL_CELL_SIGNALING	GO_CELL_CELL_SIGNALING		363	-0.412889	-1.82662	0	0.00517729	0.998	1621	tags=19%, list=11%, signal=21%
769	GO_REGULATION_OF_PROTEIN_IMPORT	GO_REGULATION_OF_PROTEIN_IMPORT		143	-0.462508	-1.82652	0	0.00518003	0.998	2113	tags=34%, list=15%, signal=39%
770	GO_INNATE_IMMUNE_RESPONSE_ACTIVATING_CELL_SURFACE_RECEPTOR_SIGNALING_PATHWAY	GO_INNATE_IMMUNE_RESPONSE_ACTIVATING_CELL_SURFACE_RECEPTOR_SIGNALING_PATHWAY		93	-0.504104	-1.82595	0	0.00520375	0.998	2777	tags=39%, list=20%, signal=48%
771	ZUCCHI_METASTASIS_UP	ZUCCHI_METASTASIS_UP		32	-0.600054	-1.82446	0	0.00529857	0.998	650	tags=16%, list=5%, signal=16%
772	GO_HEPARIN_BINDING	GO_HEPARIN_BINDING		77	-0.508341	-1.82275	0	0.00540503	0.998	2685	tags=31%, list=19%, signal=38%
773	GO_GROWTH_FACTOR_RECEPTOR_BINDING	GO_GROWTH_FACTOR_RECEPTOR_BINDING		79	-0.511973	-1.82226	0	0.00543587	0.998	1566	tags=28%, list=11%, signal=31%
774	BARIS_THYROID_CANCER_DN	BARIS_THYROID_CANCER_DN		48	-0.547628	-1.82208	0	0.00544477	0.998	847	tags=17%, list=6%, signal=18%
775	KEGG_EPITHELIAL_CELL_SIGNALING_IN_HELICOBACTER_PYLORI_INFECTION	KEGG_EPITHELIAL_CELL_SIGNALING_IN_HELICOBACTER_PYLORI_INFECTION		55	-0.527055	-1.82151	0	0.00548285	0.998	951	tags=20%, list=7%, signal=21%
776	PETROVA_ENDOTHELIUM_LYMPHATIC_VS_BLOOD_DN	PETROVA_ENDOTHELIUM_LYMPHATIC_VS_BLOOD_DN		130	-0.462281	-1.82147	0	0.0054854	0.998	1537	tags=25%, list=11%, signal=27%
777	GO_CELLULAR_RESPONSE_TO_OXIDATIVE_STRESS	GO_CELLULAR_RESPONSE_TO_OXIDATIVE_STRESS		144	-0.46208	-1.82079	0	0.00551375	0.998	1739	tags=28%, list=12%, signal=31%
778	RICKMAN_HEAD_AND_NECK_CANCER_E	RICKMAN_HEAD_AND_NECK_CANCER_E		44	-0.554831	-1.82049	0	0.00552963	0.998	2999	tags=39%, list=21%, signal=49%
779	BIOCARTA_CERAMIDE_PATHWAY	BIOCARTA_CERAMIDE_PATHWAY		20	-0.684917	-1.81976	0	0.00555906	0.998	951	tags=30%, list=7%, signal=32%
780	GO_REGULATION_OF_MYOTUBE_DIFFERENTIATION	GO_REGULATION_OF_MYOTUBE_DIFFERENTIATION		31	-0.604895	-1.81978	0.00193798	0.00556021	0.998	1210	tags=35%, list=9%, signal=39%
781	ZHAN_MULTIPLE_MYELOMA_HP_UP	ZHAN_MULTIPLE_MYELOMA_HP_UP		32	-0.596294	-1.81964	0.00207469	0.00556216	0.998	626	tags=22%, list=4%, signal=23%
782	GO_LEUKOCYTE_APOPTOTIC_PROCESS	GO_LEUKOCYTE_APOPTOTIC_PROCESS		17	-0.704039	-1.81813	0	0.00565959	0.998	1564	tags=41%, list=11%, signal=46%
783	VALK_AML_WITH_FLT3_ITD	VALK_AML_WITH_FLT3_ITD		29	-0.608615	-1.81514	0.00198413	0.00585285	0.998	347	tags=21%, list=2%, signal=21%
784	PELLICCIOTTA_HDAC_IN_ANTIGEN_PRESENTATION_DN	PELLICCIOTTA_HDAC_IN_ANTIGEN_PRESENTATION_DN		47	-0.562688	-1.81488	0	0.00585508	0.998	2277	tags=34%, list=16%, signal=40%
785	GO_DEATH_RECEPTOR_BINDING	GO_DEATH_RECEPTOR_BINDING		16	-0.724712	-1.81426	0	0.00590102	0.998	1707	tags=50%, list=12%, signal=57%
786	CHEN_HOXA5_TARGETS_9HR_UP	CHEN_HOXA5_TARGETS_9HR_UP		180	-0.444066	-1.81372	0	0.00592599	0.998	1716	tags=33%, list=12%, signal=37%
787	HAHTOLA_SEZARY_SYNDROM_UP	HAHTOLA_SEZARY_SYNDROM_UP		81	-0.501235	-1.81345	0	0.00594065	0.998	1290	tags=17%, list=9%, signal=19%
788	GO_REGULATION_OF_MEMBRANE_PERMEABILITY	GO_REGULATION_OF_MEMBRANE_PERMEABILITY		57	-0.53411	-1.81317	0	0.00594849	0.998	1198	tags=23%, list=8%, signal=25%
789	REACTOME_ANTIGEN_PROCESSING_CROSS_PRESENTATION	REACTOME_ANTIGEN_PROCESSING_CROSS_PRESENTATION		67	-0.520921	-1.81322	0	0.00594902	0.998	4072	tags=57%, list=29%, signal=79%
790	CERVERA_SDHB_TARGETS_2	CERVERA_SDHB_TARGETS_2		82	-0.496277	-1.81311	0	0.00594977	0.998	2342	tags=32%, list=17%, signal=38%
791	GO_NEGATIVE_REGULATION_OF_RESPONSE_TO_BIOTIC_STIMULUS	GO_NEGATIVE_REGULATION_OF_RESPONSE_TO_BIOTIC_STIMULUS		21	-0.664515	-1.81235	0.00220751	0.0059893	0.999	432	tags=24%, list=3%, signal=25%
792	REACTOME_REGULATION_OF_APOPTOSIS	REACTOME_REGULATION_OF_APOPTOSIS		50	-0.542904	-1.81208	0.00199601	0.00599978	0.999	2316	tags=32%, list=16%, signal=38%
793	GO_REGULATION_OF_ENDOPLASMIC_RETICULUM_UNFOLDED_PROTEIN_RESPONSE	GO_REGULATION_OF_ENDOPLASMIC_RETICULUM_UNFOLDED_PROTEIN_RESPONSE		24	-0.639291	-1.81149	0	0.00602968	0.999	1393	tags=42%, list=10%, signal=46%
794	GO_T_CELL_ACTIVATION_INVOLVED_IN_IMMUNE_RESPONSE	GO_T_CELL_ACTIVATION_INVOLVED_IN_IMMUNE_RESPONSE		41	-0.580695	-1.81125	0.00192308	0.00604506	0.999	1841	tags=44%, list=13%, signal=50%
795	REACTOME_SIGNALING_BY_SCF_KIT	REACTOME_SIGNALING_BY_SCF_KIT		62	-0.519823	-1.81089	0.00198413	0.00606579	0.999	1932	tags=31%, list=14%, signal=35%
796	GO_NEGATIVE_REGULATION_OF_RESPONSE_TO_ENDOPLASMIC_RETICULUM_STRESS	GO_NEGATIVE_REGULATION_OF_RESPONSE_TO_ENDOPLASMIC_RETICULUM_STRESS		29	-0.613482	-1.81056	0.00214592	0.00608734	0.999	2077	tags=41%, list=15%, signal=48%
797	BAKER_HEMATOPOIESIS_STAT3_TARGETS	BAKER_HEMATOPOIESIS_STAT3_TARGETS		15	-0.706577	-1.8101	0.00208333	0.00611972	0.999	813	tags=40%, list=6%, signal=42%
798	SHEDDEN_LUNG_CANCER_GOOD_SURVIVAL_A12	SHEDDEN_LUNG_CANCER_GOOD_SURVIVAL_A12		182	-0.446087	-1.80965	0	0.00615454	0.999	1422	tags=20%, list=10%, signal=22%
799	P53_DN.V1_DN	P53_DN.V1_DN		128	-0.463635	-1.80912	0	0.00617655	0.999	1261	tags=21%, list=9%, signal=23%
800	REACTOME_G_ALPHA_I_SIGNALLING_EVENTS	REACTOME_G_ALPHA_I_SIGNALLING_EVENTS		76	-0.50573	-1.80919	0	0.00618055	0.999	1627	tags=25%, list=11%, signal=28%
801	GO_DOUBLE_STRANDED_RNA_BINDING	GO_DOUBLE_STRANDED_RNA_BINDING		56	-0.539037	-1.80886	0.00192678	0.00618667	0.999	1448	tags=25%, list=10%, signal=28%
802	CROONQUIST_STROMAL_STIMULATION_UP	CROONQUIST_STROMAL_STIMULATION_UP		41	-0.567864	-1.80888	0.00193798	0.00618912	0.999	1134	tags=34%, list=8%, signal=37%
803	REACTOME_SIGNALING_BY_HIPPO	REACTOME_SIGNALING_BY_HIPPO		17	-0.69196	-1.80813	0.00209644	0.0062327	0.999	1358	tags=41%, list=10%, signal=45%
804	SENESE_HDAC1_TARGETS_UP	SENESE_HDAC1_TARGETS_UP		363	-0.416013	-1.80788	0	0.00624254	0.999	1927	tags=25%, list=14%, signal=28%
805	LEE_LIVER_CANCER_MYC_E2F1_DN	LEE_LIVER_CANCER_MYC_E2F1_DN		40	-0.559047	-1.80776	0	0.00625062	0.999	1565	tags=25%, list=11%, signal=28%
806	REACTOME_DESTABILIZATION_OF_MRNA_BY_AUF1_HNRNP_D0	REACTOME_DESTABILIZATION_OF_MRNA_BY_AUF1_HNRNP_D0		47	-0.544755	-1.80582	0	0.00639312	0.999	2108	tags=28%, list=15%, signal=32%
807	HUANG_FOXA2_TARGETS_UP	HUANG_FOXA2_TARGETS_UP		35	-0.594305	-1.80499	0.00399202	0.00643448	0.999	2867	tags=54%, list=20%, signal=68%
808	BIOCARTA_PROTEASOME_PATHWAY	BIOCARTA_PROTEASOME_PATHWAY		26	-0.617081	-1.80504	0	0.00643708	0.999	4015	tags=69%, list=28%, signal=96%
809	BIOCARTA_IL12_PATHWAY	BIOCARTA_IL12_PATHWAY		18	-0.679991	-1.80434	0.00441501	0.00647998	0.999	1418	tags=50%, list=10%, signal=55%
810	GO_CELLULAR_RESPONSE_TO_VITAMIN	GO_CELLULAR_RESPONSE_TO_VITAMIN		22	-0.662787	-1.80385	0.00826446	0.00651577	0.999	879	tags=23%, list=6%, signal=24%
811	WANG_ESOPHAGUS_CANCER_VS_NORMAL_UP	WANG_ESOPHAGUS_CANCER_VS_NORMAL_UP		97	-0.478591	-1.80378	0	0.00652274	0.999	892	tags=20%, list=6%, signal=21%
812	OSWALD_HEMATOPOIETIC_STEM_CELL_IN_COLLAGEN_GEL_UP	OSWALD_HEMATOPOIETIC_STEM_CELL_IN_COLLAGEN_GEL_UP		197	-0.437684	-1.80257	0	0.00660117	1	1400	tags=27%, list=10%, signal=29%
813	PID_IL4_2PATHWAY	PID_IL4_2PATHWAY		47	-0.553622	-1.80034	0.0038835	0.00677377	1	1198	tags=32%, list=8%, signal=35%
814	LIM_MAMMARY_LUMINAL_PROGENITOR_UP	LIM_MAMMARY_LUMINAL_PROGENITOR_UP		31	-0.59785	-1.80014	0.00792079	0.00679093	1	2420	tags=45%, list=17%, signal=54%
815	CTIP_DN.V1_UP	CTIP_DN.V1_UP		55	-0.531683	-1.79984	0	0.0068072	1	1873	tags=25%, list=13%, signal=29%
816	GROSS_HYPOXIA_VIA_ELK3_DN	GROSS_HYPOXIA_VIA_ELK3_DN		130	-0.462655	-1.79946	0	0.00683043	1	1194	tags=27%, list=8%, signal=29%
817	GO_CELLULAR_RESPONSE_TO_MECHANICAL_STIMULUS	GO_CELLULAR_RESPONSE_TO_MECHANICAL_STIMULUS		62	-0.52003	-1.79906	0	0.00685539	1	1761	tags=29%, list=12%, signal=33%
818	YAMASHITA_LIVER_CANCER_STEM_CELL_DN	YAMASHITA_LIVER_CANCER_STEM_CELL_DN		53	-0.533435	-1.79794	0.00205761	0.0069368	1	1679	tags=23%, list=12%, signal=26%
819	PID_TRAIL_PATHWAY	PID_TRAIL_PATHWAY		26	-0.614326	-1.7976	0.00813008	0.00696248	1	1208	tags=31%, list=9%, signal=34%
820	GO_RESPONSE_TO_DRUG	GO_RESPONSE_TO_DRUG		304	-0.414214	-1.79717	0	0.00698458	1	2227	tags=28%, list=16%, signal=33%
821	GO_CELLULAR_RESPONSE_TO_GROWTH_HORMONE_STIMULUS	GO_CELLULAR_RESPONSE_TO_GROWTH_HORMONE_STIMULUS		15	-0.699601	-1.79695	0.00209644	0.00698651	1	815	tags=53%, list=6%, signal=57%
822	RODWELL_AGING_KIDNEY_UP	RODWELL_AGING_KIDNEY_UP		351	-0.416121	-1.79705	0	0.00698682	1	1466	tags=19%, list=10%, signal=20%
823	TAVOR_CEBPA_TARGETS_UP	TAVOR_CEBPA_TARGETS_UP		39	-0.57165	-1.7946	0.00206186	0.00717759	1	1514	tags=33%, list=11%, signal=37%
824	GO_POSITIVE_REGULATION_OF_CYTOKINE_PRODUCTION_INVOLVED_IN_IMMUNE_RESPONSE	GO_POSITIVE_REGULATION_OF_CYTOKINE_PRODUCTION_INVOLVED_IN_IMMUNE_RESPONSE		21	-0.663731	-1.79271	0	0.00731623	1	990	tags=19%, list=7%, signal=20%
825	ZHONG_SECRETOME_OF_LUNG_CANCER_AND_MACROPHAGE	ZHONG_SECRETOME_OF_LUNG_CANCER_AND_MACROPHAGE		63	-0.518501	-1.79162	0	0.00740886	1	897	tags=13%, list=6%, signal=13%
826	KEGG_ADIPOCYTOKINE_SIGNALING_PATHWAY	KEGG_ADIPOCYTOKINE_SIGNALING_PATHWAY		55	-0.526826	-1.79143	0	0.00742026	1	1424	tags=29%, list=10%, signal=32%
827	GO_CARDIAC_CELL_DEVELOPMENT	GO_CARDIAC_CELL_DEVELOPMENT		30	-0.597504	-1.79069	0.00414079	0.00746671	1	1368	tags=30%, list=10%, signal=33%
828	GO_POSITIVE_REGULATION_OF_PROTEIN_OLIGOMERIZATION	GO_POSITIVE_REGULATION_OF_PROTEIN_OLIGOMERIZATION		18	-0.67759	-1.79073	0	0.00747164	1	1044	tags=33%, list=7%, signal=36%
829	GO_REGULATION_OF_SECRETION	GO_REGULATION_OF_SECRETION		419	-0.402639	-1.78998	0	0.00750812	1	1621	tags=19%, list=11%, signal=21%
830	RPS14_DN.V1_UP	RPS14_DN.V1_UP		158	-0.44912	-1.79001	0	0.00751221	1	912	tags=20%, list=6%, signal=21%
831	REACTOME_NOD1_2_SIGNALING_PATHWAY	REACTOME_NOD1_2_SIGNALING_PATHWAY		22	-0.634781	-1.78927	0.00218818	0.00755867	1	1929	tags=50%, list=14%, signal=58%
832	FEVR_CTNNB1_TARGETS_UP	FEVR_CTNNB1_TARGETS_UP		453	-0.398406	-1.7888	0	0.00758269	1	1298	tags=17%, list=9%, signal=18%
833	KRAS.LUNG_UP.V1_UP	KRAS.LUNG_UP.V1_UP		63	-0.514243	-1.78848	0	0.00759906	1	1262	tags=25%, list=9%, signal=28%
834	PID_IFNG_PATHWAY	PID_IFNG_PATHWAY		36	-0.590588	-1.78849	0.004158	0.00760319	1	1099	tags=36%, list=8%, signal=39%
835	GO_REGULATION_OF_COAGULATION	GO_REGULATION_OF_COAGULATION		53	-0.53258	-1.78809	0.006	0.00760982	1	1051	tags=28%, list=7%, signal=30%
836	KIM_WT1_TARGETS_UP	KIM_WT1_TARGETS_UP		159	-0.448865	-1.78816	0	0.00761468	1	1387	tags=29%, list=10%, signal=32%
837	GO_REGULATION_OF_MONOCYTE_CHEMOTAXIS	GO_REGULATION_OF_MONOCYTE_CHEMOTAXIS		17	-0.68171	-1.78651	0.00410678	0.00774127	1	366	tags=24%, list=3%, signal=24%
838	GENTILE_UV_RESPONSE_CLUSTER_D2	GENTILE_UV_RESPONSE_CLUSTER_D2		34	-0.580218	-1.78648	0.00210526	0.00774216	1	1396	tags=35%, list=10%, signal=39%
839	GO_LYMPHOCYTE_ACTIVATION	GO_LYMPHOCYTE_ACTIVATION		256	-0.4262	-1.78619	0	0.00774649	1	1285	tags=24%, list=9%, signal=26%
840	HOSHIDA_LIVER_CANCER_SURVIVAL_UP	HOSHIDA_LIVER_CANCER_SURVIVAL_UP		53	-0.542051	-1.7862	0.00204918	0.00775154	1	1155	tags=25%, list=8%, signal=27%
841	SCHLINGEMANN_SKIN_CARCINOGENESIS_TPA_UP	SCHLINGEMANN_SKIN_CARCINOGENESIS_TPA_UP		27	-0.61802	-1.78533	0.00204082	0.00779711	1	2524	tags=52%, list=18%, signal=63%
842	GO_RESPONSE_TO_ACID_CHEMICAL	GO_RESPONSE_TO_ACID_CHEMICAL		205	-0.431505	-1.78536	0	0.00779793	1	2272	tags=28%, list=16%, signal=33%
843	KOKKINAKIS_METHIONINE_DEPRIVATION_96HR_UP	KOKKINAKIS_METHIONINE_DEPRIVATION_96HR_UP		106	-0.477471	-1.78417	0	0.00790792	1	1208	tags=26%, list=9%, signal=29%
844	GO_POSITIVE_REGULATION_OF_TYROSINE_PHOSPHORYLATION_OF_STAT3_PROTEIN	GO_POSITIVE_REGULATION_OF_TYROSINE_PHOSPHORYLATION_OF_STAT3_PROTEIN		24	-0.633754	-1.78391	0.00819672	0.00792044	1	1240	tags=46%, list=9%, signal=50%
845	GO_POSITIVE_REGULATION_OF_T_CELL_MEDIATED_IMMUNITY	GO_POSITIVE_REGULATION_OF_T_CELL_MEDIATED_IMMUNITY		23	-0.645471	-1.78308	0.0043573	0.00798912	1	1104	tags=30%, list=8%, signal=33%
846	PODAR_RESPONSE_TO_ADAPHOSTIN_UP	PODAR_RESPONSE_TO_ADAPHOSTIN_UP		122	-0.462718	-1.78243	0.00175747	0.00802332	1	2145	tags=39%, list=15%, signal=45%
847	GO_CYSTEINE_TYPE_ENDOPEPTIDASE_REGULATOR_ACTIVITY_INVOLVED_IN_APOPTOTIC_PROCESS	GO_CYSTEINE_TYPE_ENDOPEPTIDASE_REGULATOR_ACTIVITY_INVOLVED_IN_APOPTOTIC_PROCESS		30	-0.594658	-1.78208	0.00210526	0.00804729	1	1426	tags=30%, list=10%, signal=33%
848	BIOCARTA_TH1TH2_PATHWAY	BIOCARTA_TH1TH2_PATHWAY		15	-0.705106	-1.78197	0.00425532	0.00805133	1	1104	tags=47%, list=8%, signal=51%
849	KUMAR_TARGETS_OF_MLL_AF9_FUSION	KUMAR_TARGETS_OF_MLL_AF9_FUSION		283	-0.416872	-1.78165	0	0.00807956	1	1135	tags=15%, list=8%, signal=16%
850	GO_NEGATIVE_REGULATION_OF_STAT_CASCADE	GO_NEGATIVE_REGULATION_OF_STAT_CASCADE		24	-0.624362	-1.78022	0.00421053	0.00820668	1	450	tags=25%, list=3%, signal=26%
851	GO_POSITIVE_REGULATION_OF_INTRACELLULAR_TRANSPORT	GO_POSITIVE_REGULATION_OF_INTRACELLULAR_TRANSPORT		268	-0.416858	-1.77994	0	0.00821945	1	1707	tags=22%, list=12%, signal=24%
852	YAO_TEMPORAL_RESPONSE_TO_PROGESTERONE_CLUSTER_5	YAO_TEMPORAL_RESPONSE_TO_PROGESTERONE_CLUSTER_5		21	-0.64113	-1.7794	0	0.00826881	1	1004	tags=43%, list=7%, signal=46%
853	GO_NEGATIVE_REGULATION_OF_CELL_ADHESION	GO_NEGATIVE_REGULATION_OF_CELL_ADHESION		160	-0.444087	-1.77888	0	0.00830507	1	2477	tags=31%, list=17%, signal=37%
854	GO_REGULATION_OF_INTERLEUKIN_17_PRODUCTION	GO_REGULATION_OF_INTERLEUKIN_17_PRODUCTION		16	-0.685145	-1.77782	0.00200401	0.00839491	1	1104	tags=38%, list=8%, signal=41%
855	GO_INTRINSIC_APOPTOTIC_SIGNALING_PATHWAY_IN_RESPONSE_TO_DNA_DAMAGE_BY_P53_CLASS_MEDIATOR	GO_INTRINSIC_APOPTOTIC_SIGNALING_PATHWAY_IN_RESPONSE_TO_DNA_DAMAGE_BY_P53_CLASS_MEDIATOR		23	-0.639719	-1.77706	0.00210526	0.00846995	1	1244	tags=30%, list=9%, signal=33%
856	SNF5_DN.V1_UP	SNF5_DN.V1_UP		139	-0.454677	-1.77686	0	0.00848608	1	1052	tags=18%, list=7%, signal=19%
857	PID_IL2_STAT5_PATHWAY	PID_IL2_STAT5_PATHWAY		26	-0.610599	-1.77602	0.004158	0.00855262	1	1875	tags=46%, list=13%, signal=53%
858	GO_THREONINE_TYPE_PEPTIDASE_ACTIVITY	GO_THREONINE_TYPE_PEPTIDASE_ACTIVITY		18	-0.664026	-1.77516	0.00408998	0.00860319	1	4015	tags=83%, list=28%, signal=116%
859	GO_SKIN_DEVELOPMENT	GO_SKIN_DEVELOPMENT		104	-0.470204	-1.77434	0	0.00868257	1	1868	tags=29%, list=13%, signal=33%
860	ZWANG_CLASS_1_TRANSIENTLY_INDUCED_BY_EGF	ZWANG_CLASS_1_TRANSIENTLY_INDUCED_BY_EGF		340	-0.405056	-1.77383	0	0.0087248	1	1713	tags=29%, list=12%, signal=32%
861	SHAFFER_IRF4_TARGETS_IN_ACTIVATED_DENDRITIC_CELL	SHAFFER_IRF4_TARGETS_IN_ACTIVATED_DENDRITIC_CELL		56	-0.517683	-1.77377	0.00186567	0.00872749	1	1743	tags=27%, list=12%, signal=30%
862	GO_CELLULAR_RESPONSE_TO_HYDROGEN_PEROXIDE	GO_CELLULAR_RESPONSE_TO_HYDROGEN_PEROXIDE		50	-0.530105	-1.77285	0.00198413	0.00881988	1	1103	tags=32%, list=8%, signal=35%
863	PID_FAS_PATHWAY	PID_FAS_PATHWAY		36	-0.578309	-1.77208	0.00390625	0.00886321	1	1707	tags=36%, list=12%, signal=41%
864	GO_RESPONSE_TO_TEMPERATURE_STIMULUS	GO_RESPONSE_TO_TEMPERATURE_STIMULUS		103	-0.466855	-1.77211	0.00185529	0.00886635	1	1595	tags=27%, list=11%, signal=30%
865	SENGUPTA_NASOPHARYNGEAL_CARCINOMA_UP	SENGUPTA_NASOPHARYNGEAL_CARCINOMA_UP		227	-0.424799	-1.77022	0	0.00902841	1	1339	tags=21%, list=9%, signal=23%
866	GO_RESPONSE_TO_STEROID_HORMONE	GO_RESPONSE_TO_STEROID_HORMONE		308	-0.407997	-1.7676	0	0.00926324	1	1097	tags=18%, list=8%, signal=19%
867	CHR4Q22	CHR4Q22		15	-0.708208	-1.76747	0.00212766	0.0092753	1	61	tags=20%, list=0%, signal=20%
868	KEGG_NATURAL_KILLER_CELL_MEDIATED_CYTOTOXICITY	KEGG_NATURAL_KILLER_CELL_MEDIATED_CYTOTOXICITY		94	-0.477851	-1.76639	0	0.00935976	1	1765	tags=31%, list=12%, signal=35%
869	KIM_MYC_AMPLIFICATION_TARGETS_DN	KIM_MYC_AMPLIFICATION_TARGETS_DN		58	-0.518087	-1.76599	0	0.00939441	1	1380	tags=26%, list=10%, signal=29%
870	GO_POSITIVE_REGULATION_OF_LEUKOCYTE_MEDIATED_IMMUNITY	GO_POSITIVE_REGULATION_OF_LEUKOCYTE_MEDIATED_IMMUNITY		59	-0.516513	-1.76587	0	0.00939909	1	1147	tags=25%, list=8%, signal=28%
871	GO_REGULATION_OF_CYTOPLASMIC_TRANSPORT	GO_REGULATION_OF_CYTOPLASMIC_TRANSPORT		352	-0.400222	-1.76513	0	0.00946962	1	1693	tags=21%, list=12%, signal=23%
872	GO_MICROVILLUS	GO_MICROVILLUS		48	-0.548067	-1.76445	0.00194932	0.00952667	1	419	tags=19%, list=3%, signal=19%
873	LIANG_SILENCED_BY_METHYLATION_UP	LIANG_SILENCED_BY_METHYLATION_UP		19	-0.650877	-1.76415	0.00631579	0.00955145	1	2152	tags=32%, list=15%, signal=37%
874	WANG_CLIM2_TARGETS_DN	WANG_CLIM2_TARGETS_DN		146	-0.453239	-1.76304	0	0.00968264	1	2204	tags=26%, list=16%, signal=30%
875	CHICAS_RB1_TARGETS_SENESCENT	CHICAS_RB1_TARGETS_SENESCENT		436	-0.394007	-1.76264	0	0.0097199	1	1312	tags=18%, list=9%, signal=20%
876	BIOCARTA_IL2RB_PATHWAY	BIOCARTA_IL2RB_PATHWAY		37	-0.566755	-1.76251	0.0040404	0.0097252	1	538	tags=27%, list=4%, signal=28%
877	KERLEY_RESPONSE_TO_CISPLATIN_UP	KERLEY_RESPONSE_TO_CISPLATIN_UP		34	-0.580733	-1.76212	0.00617284	0.00975505	1	1244	tags=29%, list=9%, signal=32%
878	GO_APOPTOTIC_MITOCHONDRIAL_CHANGES	GO_APOPTOTIC_MITOCHONDRIAL_CHANGES		45	-0.54054	-1.76178	0.00383877	0.00978008	1	1305	tags=24%, list=9%, signal=27%
879	FONTAINE_THYROID_TUMOR_UNCERTAIN_MALIGNANCY_DN	FONTAINE_THYROID_TUMOR_UNCERTAIN_MALIGNANCY_DN		21	-0.636287	-1.76149	0.00414079	0.00980058	1	967	tags=29%, list=7%, signal=31%
880	GO_PROTEIN_KINASE_B_SIGNALING	GO_PROTEIN_KINASE_B_SIGNALING		28	-0.599821	-1.76063	0.00379507	0.00987987	1	1128	tags=21%, list=8%, signal=23%
881	HAHTOLA_MYCOSIS_FUNGOIDES_UP	HAHTOLA_MYCOSIS_FUNGOIDES_UP		16	-0.680681	-1.75997	0.00856531	0.00993471	1	1160	tags=31%, list=8%, signal=34%
882	GO_MHC_CLASS_I_PROTEIN_BINDING	GO_MHC_CLASS_I_PROTEIN_BINDING		16	-0.680506	-1.75941	0.0102669	0.0100028	1	2922	tags=63%, list=21%, signal=79%
883	GO_GROWTH_FACTOR_ACTIVITY	GO_GROWTH_FACTOR_ACTIVITY		76	-0.487585	-1.75899	0.00189753	0.0100456	1	1559	tags=25%, list=11%, signal=28%
884	JNK_DN.V1_UP	JNK_DN.V1_UP		90	-0.479431	-1.75887	0	0.010053	1	1358	tags=19%, list=10%, signal=21%
885	GO_BLOOD_MICROPARTICLE	GO_BLOOD_MICROPARTICLE		65	-0.505873	-1.75865	0	0.0100685	1	3568	tags=42%, list=25%, signal=55%
886	LENAOUR_DENDRITIC_CELL_MATURATION_DN	LENAOUR_DENDRITIC_CELL_MATURATION_DN		118	-0.457623	-1.75688	0	0.0102402	1	1621	tags=22%, list=11%, signal=25%
887	GO_RESPONSE_TO_TOXIC_SUBSTANCE	GO_RESPONSE_TO_TOXIC_SUBSTANCE		168	-0.435994	-1.75648	0	0.0102636	1	1426	tags=19%, list=10%, signal=21%
888	GO_NEGATIVE_REGULATION_OF_T_CELL_PROLIFERATION	GO_NEGATIVE_REGULATION_OF_T_CELL_PROLIFERATION		36	-0.561735	-1.75634	0.00399202	0.0102685	1	2477	tags=36%, list=17%, signal=44%
889	GO_GLYCOSAMINOGLYCAN_BINDING	GO_GLYCOSAMINOGLYCAN_BINDING		104	-0.465778	-1.755	0	0.0104122	1	2685	tags=32%, list=19%, signal=39%
890	GO_ANTIGEN_PROCESSING_AND_PRESENTATION_OF_PEPTIDE_ANTIGEN_VIA_MHC_CLASS_I	GO_ANTIGEN_PROCESSING_AND_PRESENTATION_OF_PEPTIDE_ANTIGEN_VIA_MHC_CLASS_I		79	-0.483767	-1.75493	0.00178891	0.0104138	1	2477	tags=28%, list=17%, signal=34%
891	GO_REGULATION_OF_MACROPHAGE_ACTIVATION	GO_REGULATION_OF_MACROPHAGE_ACTIVATION		16	-0.693208	-1.75472	0.0123203	0.0104273	1	1058	tags=31%, list=7%, signal=34%
892	SESTO_RESPONSE_TO_UV_C2	SESTO_RESPONSE_TO_UV_C2		46	-0.5335	-1.75365	0	0.0105192	1	2087	tags=33%, list=15%, signal=38%
893	VEGF_A_UP.V1_UP	VEGF_A_UP.V1_UP		116	-0.460558	-1.75354	0.00191571	0.0105262	1	1610	tags=28%, list=11%, signal=32%
894	DACOSTA_UV_RESPONSE_VIA_ERCC3_TTD_UP	DACOSTA_UV_RESPONSE_VIA_ERCC3_TTD_UP		49	-0.529443	-1.75369	0	0.0105289	1	778	tags=16%, list=5%, signal=17%
895	GO_NEGATIVE_REGULATION_OF_CELL_KILLING	GO_NEGATIVE_REGULATION_OF_CELL_KILLING		15	-0.706245	-1.75249	0.0107759	0.0106314	1	123	tags=20%, list=1%, signal=20%
896	HALLMARK_HYPOXIA	HALLMARK_HYPOXIA		159	-0.438679	-1.7524	0	0.010636	1	1537	tags=26%, list=11%, signal=29%
897	GO_RESPONSE_TO_COPPER_ION	GO_RESPONSE_TO_COPPER_ION		21	-0.623958	-1.75187	0.00212766	0.010691	1	520	tags=19%, list=4%, signal=20%
898	CHARAFE_BREAST_CANCER_LUMINAL_VS_MESENCHYMAL_DN	CHARAFE_BREAST_CANCER_LUMINAL_VS_MESENCHYMAL_DN		355	-0.400721	-1.75132	0	0.0107333	1	918	tags=15%, list=6%, signal=16%
899	MANTOVANI_VIRAL_GPCR_SIGNALING_UP	MANTOVANI_VIRAL_GPCR_SIGNALING_UP		50	-0.518718	-1.75048	0	0.0108335	1	1078	tags=22%, list=8%, signal=24%
900	MCBRYAN_PUBERTAL_TGFB1_TARGETS_DN	MCBRYAN_PUBERTAL_TGFB1_TARGETS_DN		51	-0.528938	-1.75022	0.0039604	0.0108471	1	417	tags=18%, list=3%, signal=18%
901	HALLMARK_UV_RESPONSE_UP	HALLMARK_UV_RESPONSE_UP		136	-0.444442	-1.75002	0	0.0108618	1	1583	tags=24%, list=11%, signal=26%
902	GO_REGULATION_OF_ENDOPLASMIC_RETICULUM_STRESS_INDUCED_INTRINSIC_APOPTOTIC_SIGNALING_PATHWAY	GO_REGULATION_OF_ENDOPLASMIC_RETICULUM_STRESS_INDUCED_INTRINSIC_APOPTOTIC_SIGNALING_PATHWAY		25	-0.607407	-1.74982	0.00867679	0.010882	1	2077	tags=44%, list=15%, signal=51%
903	OHGUCHI_LIVER_HNF4A_TARGETS_UP	OHGUCHI_LIVER_HNF4A_TARGETS_UP		28	-0.595299	-1.7489	0.0063425	0.0109809	1	1082	tags=25%, list=8%, signal=27%
904	GO_REGULATION_OF_TISSUE_REMODELING	GO_REGULATION_OF_TISSUE_REMODELING		43	-0.549344	-1.74816	0.00202429	0.011067	1	1104	tags=26%, list=8%, signal=28%
905	GO_SERINE_TYPE_ENDOPEPTIDASE_INHIBITOR_ACTIVITY	GO_SERINE_TYPE_ENDOPEPTIDASE_INHIBITOR_ACTIVITY		41	-0.550362	-1.74747	0.00197628	0.0111362	1	1586	tags=27%, list=11%, signal=30%
906	GO_CELLULAR_RESPONSE_TO_EXTERNAL_STIMULUS	GO_CELLULAR_RESPONSE_TO_EXTERNAL_STIMULUS		198	-0.428993	-1.74728	0	0.0111554	1	2145	tags=29%, list=15%, signal=33%
907	GO_POSITIVE_REGULATION_OF_LYMPHOCYTE_MEDIATED_IMMUNITY	GO_POSITIVE_REGULATION_OF_LYMPHOCYTE_MEDIATED_IMMUNITY		49	-0.539857	-1.74714	0	0.0111714	1	1380	tags=29%, list=10%, signal=32%
908	GO_ANTIGEN_PROCESSING_AND_PRESENTATION_OF_EXOGENOUS_PEPTIDE_ANTIGEN_VIA_MHC_CLASS_I	GO_ANTIGEN_PROCESSING_AND_PRESENTATION_OF_EXOGENOUS_PEPTIDE_ANTIGEN_VIA_MHC_CLASS_I		59	-0.509819	-1.74671	0	0.0112081	1	4072	tags=54%, list=29%, signal=76%
909	GO_REGULATION_OF_PROTEOLYSIS	GO_REGULATION_OF_PROTEOLYSIS		495	-0.389329	-1.7466	0	0.0112102	1	1721	tags=19%, list=12%, signal=21%
910	GO_POSITIVE_REGULATION_OF_PEPTIDYL_THREONINE_PHOSPHORYLATION	GO_POSITIVE_REGULATION_OF_PEPTIDYL_THREONINE_PHOSPHORYLATION		16	-0.67458	-1.74667	0.00426439	0.0112107	1	1419	tags=25%, list=10%, signal=28%
911	TARTE_PLASMA_CELL_VS_PLASMABLAST_UP	TARTE_PLASMA_CELL_VS_PLASMABLAST_UP		259	-0.408407	-1.74629	0	0.0112425	1	1453	tags=18%, list=10%, signal=19%
912	GO_POSITIVE_REGULATION_OF_VASOCONSTRICTION	GO_POSITIVE_REGULATION_OF_VASOCONSTRICTION		18	-0.649086	-1.74611	0.0163934	0.0112524	1	945	tags=28%, list=7%, signal=30%
913	GO_VASODILATION	GO_VASODILATION		15	-0.675484	-1.74474	0.0110132	0.0114023	1	150	tags=20%, list=1%, signal=20%
914	REACTOME_AUTODEGRADATION_OF_THE_E3_UBIQUITIN_LIGASE_COP1	REACTOME_AUTODEGRADATION_OF_THE_E3_UBIQUITIN_LIGASE_COP1		45	-0.537549	-1.74477	0.00383877	0.0114069	1	4175	tags=53%, list=29%, signal=75%
915	STAT_01	STAT_01		163	-0.434055	-1.74378	0	0.0115186	1	1704	tags=23%, list=12%, signal=26%
916	MORI_IMMATURE_B_LYMPHOCYTE_UP	MORI_IMMATURE_B_LYMPHOCYTE_UP		47	-0.527888	-1.74316	0.00189753	0.0115848	1	1315	tags=28%, list=9%, signal=30%
917	SATO_SILENCED_BY_METHYLATION_IN_PANCREATIC_CANCER_2	SATO_SILENCED_BY_METHYLATION_IN_PANCREATIC_CANCER_2		31	-0.578047	-1.74234	0	0.0117006	1	1339	tags=32%, list=9%, signal=36%
918	PID_TCPTP_PATHWAY	PID_TCPTP_PATHWAY		36	-0.567346	-1.74161	0.00197239	0.0117617	1	1228	tags=31%, list=9%, signal=33%
919	GO_NEGATIVE_REGULATION_OF_LEUKOCYTE_MEDIATED_IMMUNITY	GO_NEGATIVE_REGULATION_OF_LEUKOCYTE_MEDIATED_IMMUNITY		36	-0.561201	-1.74172	0.00400802	0.0117642	1	1765	tags=31%, list=12%, signal=35%
920	GO_PROSTATE_GLAND_DEVELOPMENT	GO_PROSTATE_GLAND_DEVELOPMENT		29	-0.600288	-1.74163	0.00210526	0.0117665	1	1088	tags=28%, list=8%, signal=30%
921	ACEVEDO_FGFR1_TARGETS_IN_PROSTATE_CANCER_MODEL_UP	ACEVEDO_FGFR1_TARGETS_IN_PROSTATE_CANCER_MODEL_UP		195	-0.426761	-1.74139	0	0.0117787	1	2358	tags=30%, list=17%, signal=36%
922	REACTOME_SCFSKP2_MEDIATED_DEGRADATION_OF_P27_P21	REACTOME_SCFSKP2_MEDIATED_DEGRADATION_OF_P27_P21		51	-0.521462	-1.74142	0.00193424	0.0117842	1	2108	tags=31%, list=15%, signal=37%
923	GO_RESPONSE_TO_MECHANICAL_STIMULUS	GO_RESPONSE_TO_MECHANICAL_STIMULUS		142	-0.444869	-1.7411	0	0.0118057	1	2170	tags=32%, list=15%, signal=37%
924	GO_RESPONSE_TO_OSMOTIC_STRESS	GO_RESPONSE_TO_OSMOTIC_STRESS		48	-0.521585	-1.74037	0	0.0118929	1	1128	tags=23%, list=8%, signal=25%
925	HU_GENOTOXIC_DAMAGE_24HR	HU_GENOTOXIC_DAMAGE_24HR		29	-0.584358	-1.73931	0.00631579	0.0119953	1	1096	tags=28%, list=8%, signal=30%
926	GO_NEGATIVE_REGULATION_OF_LEUKOCYTE_PROLIFERATION	GO_NEGATIVE_REGULATION_OF_LEUKOCYTE_PROLIFERATION		50	-0.525746	-1.73859	0.00197239	0.0120878	1	2477	tags=36%, list=17%, signal=43%
927	GO_NEGATIVE_REGULATION_OF_STRIATED_MUSCLE_CELL_DIFFERENTIATION	GO_NEGATIVE_REGULATION_OF_STRIATED_MUSCLE_CELL_DIFFERENTIATION		18	-0.671944	-1.73721	0.00875273	0.012258	1	2036	tags=50%, list=14%, signal=58%
928	GO_CYCLIC_NUCLEOTIDE_BINDING	GO_CYCLIC_NUCLEOTIDE_BINDING		17	-0.65904	-1.7366	0.0111857	0.0123332	1	2659	tags=53%, list=19%, signal=65%
929	ONO_FOXP3_TARGETS_DN	ONO_FOXP3_TARGETS_DN		36	-0.551221	-1.73516	0.00609756	0.0124788	1	1290	tags=33%, list=9%, signal=37%
930	GO_RESPONSE_TO_AMINO_ACID	GO_RESPONSE_TO_AMINO_ACID		77	-0.487403	-1.73495	0	0.0124916	1	2199	tags=31%, list=15%, signal=37%
931	YORDY_RECIPROCAL_REGULATION_BY_ETS1_AND_SP100_DN	YORDY_RECIPROCAL_REGULATION_BY_ETS1_AND_SP100_DN		62	-0.500971	-1.73475	0	0.0125057	1	1604	tags=26%, list=11%, signal=29%
932	GO_POSITIVE_REGULATION_OF_ALPHA_BETA_T_CELL_PROLIFERATION	GO_POSITIVE_REGULATION_OF_ALPHA_BETA_T_CELL_PROLIFERATION		15	-0.686975	-1.73411	0.004	0.012579	1	1104	tags=40%, list=8%, signal=43%
933	DURAND_STROMA_S_UP	DURAND_STROMA_S_UP		188	-0.429405	-1.73403	0	0.01258	1	1367	tags=19%, list=10%, signal=21%
934	ZHENG_FOXP3_TARGETS_IN_THYMUS_UP	ZHENG_FOXP3_TARGETS_IN_THYMUS_UP		162	-0.431202	-1.73347	0	0.0126545	1	1463	tags=23%, list=10%, signal=25%
935	GO_POSITIVE_REGULATION_OF_IMMUNOGLOBULIN_PRODUCTION	GO_POSITIVE_REGULATION_OF_IMMUNOGLOBULIN_PRODUCTION		23	-0.612728	-1.73333	0.00980392	0.0126653	1	1765	tags=39%, list=12%, signal=45%
936	KEGG_SYSTEMIC_LUPUS_ERYTHEMATOSUS	KEGG_SYSTEMIC_LUPUS_ERYTHEMATOSUS		68	-0.493126	-1.73326	0	0.0126655	1	1189	tags=18%, list=8%, signal=19%
937	WANG_SMARCE1_TARGETS_DN	WANG_SMARCE1_TARGETS_DN		269	-0.404468	-1.73315	0	0.0126741	1	1648	tags=21%, list=12%, signal=23%
938	GO_EPIDERMAL_CELL_DIFFERENTIATION	GO_EPIDERMAL_CELL_DIFFERENTIATION		66	-0.502867	-1.73275	0.00187266	0.0127154	1	1358	tags=24%, list=10%, signal=27%
939	GO_PROTEIN_MATURATION	GO_PROTEIN_MATURATION		182	-0.425207	-1.73267	0	0.0127255	1	2268	tags=25%, list=16%, signal=30%
940	GO_CELLULAR_RESPONSE_TO_REACTIVE_OXYGEN_SPECIES	GO_CELLULAR_RESPONSE_TO_REACTIVE_OXYGEN_SPECIES		81	-0.473783	-1.73253	0	0.0127332	1	1234	tags=27%, list=9%, signal=30%
941	GROSS_HYPOXIA_VIA_ELK3_ONLY_UP	GROSS_HYPOXIA_VIA_ELK3_ONLY_UP		31	-0.571173	-1.7318	0.00996016	0.0128087	1	1194	tags=42%, list=8%, signal=46%
942	WENG_POR_TARGETS_LIVER_DN	WENG_POR_TARGETS_LIVER_DN		16	-0.690384	-1.73062	0.00674157	0.0129677	1	1036	tags=31%, list=7%, signal=34%
943	GO_NEGATIVE_REGULATION_OF_LEUKOCYTE_APOPTOTIC_PROCESS	GO_NEGATIVE_REGULATION_OF_LEUKOCYTE_APOPTOTIC_PROCESS		33	-0.574435	-1.72883	0.00590551	0.0132301	1	1550	tags=30%, list=11%, signal=34%
944	WESTON_VEGFA_TARGETS	WESTON_VEGFA_TARGETS		70	-0.497154	-1.72824	0	0.0133006	1	457	tags=16%, list=3%, signal=16%
945	KEEN_RESPONSE_TO_ROSIGLITAZONE_DN	KEEN_RESPONSE_TO_ROSIGLITAZONE_DN		82	-0.476627	-1.7276	0	0.0133725	1	1041	tags=17%, list=7%, signal=18%
946	HOSHIDA_LIVER_CANCER_SUBCLASS_S1	HOSHIDA_LIVER_CANCER_SUBCLASS_S1		203	-0.420818	-1.72709	0	0.0134297	1	1446	tags=14%, list=10%, signal=16%
947	P53_DN.V1_UP	P53_DN.V1_UP		128	-0.438967	-1.72656	0	0.0134862	1	1358	tags=20%, list=10%, signal=22%
948	GO_NEGATIVE_REGULATION_OF_LYMPHOCYTE_MEDIATED_IMMUNITY	GO_NEGATIVE_REGULATION_OF_LYMPHOCYTE_MEDIATED_IMMUNITY		26	-0.6018	-1.726	0.00584795	0.0135408	1	164	tags=15%, list=1%, signal=16%
949	GRADE_METASTASIS_DN	GRADE_METASTASIS_DN		40	-0.548494	-1.72576	0	0.0135612	1	1648	tags=28%, list=12%, signal=31%
950	GO_REGULATION_OF_CELLULAR_AMINO_ACID_METABOLIC_PROCESS	GO_REGULATION_OF_CELLULAR_AMINO_ACID_METABOLIC_PROCESS		55	-0.515414	-1.72508	0	0.0136397	1	4071	tags=51%, list=29%, signal=71%
951	REACTOME_CDK_MEDIATED_PHOSPHORYLATION_AND_REMOVAL_OF_CDC6	REACTOME_CDK_MEDIATED_PHOSPHORYLATION_AND_REMOVAL_OF_CDC6		44	-0.530495	-1.72455	0.011811	0.0137109	1	2108	tags=27%, list=15%, signal=32%
952	LINDGREN_BLADDER_CANCER_CLUSTER_2B	LINDGREN_BLADDER_CANCER_CLUSTER_2B		295	-0.401297	-1.72363	0	0.0138166	1	1435	tags=20%, list=10%, signal=22%
953	GO_REGULATION_OF_INTRINSIC_APOPTOTIC_SIGNALING_PATHWAY	GO_REGULATION_OF_INTRINSIC_APOPTOTIC_SIGNALING_PATHWAY		117	-0.451623	-1.72317	0	0.013877	1	1346	tags=19%, list=9%, signal=21%
954	GO_INTRACELLULAR_RECEPTOR_SIGNALING_PATHWAY	GO_INTRACELLULAR_RECEPTOR_SIGNALING_PATHWAY		114	-0.457116	-1.72214	0	0.0139822	1	942	tags=19%, list=7%, signal=21%
955	MORI_LARGE_PRE_BII_LYMPHOCYTE_DN	MORI_LARGE_PRE_BII_LYMPHOCYTE_DN		48	-0.52479	-1.72147	0.00205339	0.0140663	1	1307	tags=31%, list=9%, signal=34%
956	GO_MICROVILLUS_ORGANIZATION	GO_MICROVILLUS_ORGANIZATION		17	-0.663866	-1.72023	0.0127932	0.0142327	1	1176	tags=41%, list=8%, signal=45%
957	GO_G_PROTEIN_COUPLED_RECEPTOR_SIGNALING_PATHWAY	GO_G_PROTEIN_COUPLED_RECEPTOR_SIGNALING_PATHWAY		347	-0.394572	-1.7194	0	0.0143276	1	1563	tags=20%, list=11%, signal=21%
958	MTOR_UP.V1_UP	MTOR_UP.V1_UP		109	-0.455007	-1.71945	0.0018018	0.0143389	1	892	tags=14%, list=6%, signal=15%
959	GO_NEGATIVE_REGULATION_OF_HOMOTYPIC_CELL_CELL_ADHESION	GO_NEGATIVE_REGULATION_OF_HOMOTYPIC_CELL_CELL_ADHESION		70	-0.482951	-1.71824	0.00199203	0.0144602	1	1127	tags=20%, list=8%, signal=22%
960	PID_CASPASE_PATHWAY	PID_CASPASE_PATHWAY		46	-0.529277	-1.71803	0.00394477	0.0144772	1	1160	tags=33%, list=8%, signal=35%
961	VERHAAK_AML_WITH_NPM1_MUTATED_DN	VERHAAK_AML_WITH_NPM1_MUTATED_DN		169	-0.424192	-1.71722	0	0.0145888	1	2038	tags=25%, list=14%, signal=29%
962	GO_NEGATIVE_REGULATION_OF_ESTABLISHMENT_OF_PROTEIN_LOCALIZATION	GO_NEGATIVE_REGULATION_OF_ESTABLISHMENT_OF_PROTEIN_LOCALIZATION		145	-0.438173	-1.71644	0	0.0146947	1	1446	tags=21%, list=10%, signal=23%
963	AMIT_EGF_RESPONSE_240_HELA	AMIT_EGF_RESPONSE_240_HELA		50	-0.528001	-1.71609	0.00189753	0.0147413	1	1403	tags=28%, list=10%, signal=31%
964	REACTOME_CTLA4_INHIBITORY_SIGNALING	REACTOME_CTLA4_INHIBITORY_SIGNALING		21	-0.635684	-1.71573	0.0103734	0.0147807	1	782	tags=19%, list=6%, signal=20%
965	GALLUZZI_PERMEABILIZE_MITOCHONDRIA	GALLUZZI_PERMEABILIZE_MITOCHONDRIA		37	-0.539587	-1.71548	0.00747664	0.0147972	1	1198	tags=32%, list=8%, signal=35%
966	ATGTCAC_MIR489	ATGTCAC_MIR489		59	-0.504347	-1.71371	0.003861	0.015085	1	1889	tags=29%, list=13%, signal=33%
967	GO_RESPONSE_TO_ISOQUINOLINE_ALKALOID	GO_RESPONSE_TO_ISOQUINOLINE_ALKALOID		21	-0.619603	-1.71352	0.008	0.015088	1	460	tags=24%, list=3%, signal=25%
968	GO_GUANYL_NUCLEOTIDE_BINDING	GO_GUANYL_NUCLEOTIDE_BINDING		267	-0.400683	-1.71353	0	0.0150914	1	1859	tags=25%, list=13%, signal=28%
969	GO_NEGATIVE_REGULATION_OF_LOCOMOTION	GO_NEGATIVE_REGULATION_OF_LOCOMOTION		184	-0.417775	-1.71355	0	0.0150978	1	1566	tags=23%, list=11%, signal=25%
970	GO_PEPTIDASE_INHIBITOR_ACTIVITY	GO_PEPTIDASE_INHIBITOR_ACTIVITY		82	-0.468758	-1.71224	0	0.0152729	1	2621	tags=30%, list=18%, signal=37%
971	GO_RESPONSE_TO_NICOTINE	GO_RESPONSE_TO_NICOTINE		25	-0.586378	-1.71111	0.00425532	0.0154153	1	1526	tags=44%, list=11%, signal=49%
972	GO_EPITHELIAL_CELL_DEVELOPMENT	GO_EPITHELIAL_CELL_DEVELOPMENT		115	-0.451832	-1.71101	0	0.0154154	1	532	tags=14%, list=4%, signal=14%
973	GO_TAXIS	GO_TAXIS		286	-0.400832	-1.71059	0	0.0154699	1	2086	tags=27%, list=15%, signal=31%
974	GO_NEGATIVE_REGULATION_OF_CELL_ACTIVATION	GO_NEGATIVE_REGULATION_OF_CELL_ACTIVATION		117	-0.444754	-1.71001	0	0.0155456	1	1127	tags=19%, list=8%, signal=20%
975	PLASARI_TGFB1_TARGETS_10HR_DN	PLASARI_TGFB1_TARGETS_10HR_DN		186	-0.424624	-1.70978	0	0.0155809	1	1108	tags=19%, list=8%, signal=20%
976	PID_P53_DOWNSTREAM_PATHWAY	PID_P53_DOWNSTREAM_PATHWAY		106	-0.451526	-1.70933	0.00366972	0.0156412	1	1261	tags=24%, list=9%, signal=26%
977	GO_REGULATION_OF_PROTEIN_OLIGOMERIZATION	GO_REGULATION_OF_PROTEIN_OLIGOMERIZATION		27	-0.585992	-1.70917	0.00842105	0.0156536	1	1044	tags=26%, list=7%, signal=28%
978	MULLIGHAN_MLL_SIGNATURE_1_DN	MULLIGHAN_MLL_SIGNATURE_1_DN		163	-0.425936	-1.70836	0	0.0157479	1	1396	tags=21%, list=10%, signal=23%
979	GUO_TARGETS_OF_IRS1_AND_IRS2	GUO_TARGETS_OF_IRS1_AND_IRS2		72	-0.48533	-1.70839	0.00204499	0.0157524	1	2456	tags=31%, list=17%, signal=37%
980	GO_REGULATION_OF_STEM_CELL_DIFFERENTIATION	GO_REGULATION_OF_STEM_CELL_DIFFERENTIATION		73	-0.479481	-1.70731	0.00184843	0.0158923	1	2036	tags=33%, list=14%, signal=38%
981	GO_PEPTIDASE_REGULATOR_ACTIVITY	GO_PEPTIDASE_REGULATOR_ACTIVITY		113	-0.453272	-1.70717	0	0.0159074	1	2621	tags=30%, list=18%, signal=37%
982	GO_CELLULAR_RESPONSE_TO_NUTRIENT	GO_CELLULAR_RESPONSE_TO_NUTRIENT		32	-0.568363	-1.7064	0.00399202	0.01597	1	2012	tags=34%, list=14%, signal=40%
983	GO_T_CELL_DIFFERENTIATION	GO_T_CELL_DIFFERENTIATION		95	-0.456812	-1.70644	0	0.0159746	1	1276	tags=27%, list=9%, signal=30%
984	GO_SIGNAL_TRANSDUCTION_BY_PROTEIN_PHOSPHORYLATION	GO_SIGNAL_TRANSDUCTION_BY_PROTEIN_PHOSPHORYLATION		290	-0.400994	-1.70657	0	0.0159765	1	1099	tags=17%, list=8%, signal=18%
985	GO_T_CELL_PROLIFERATION	GO_T_CELL_PROLIFERATION		32	-0.563492	-1.70599	0.00978474	0.0160207	1	1127	tags=25%, list=8%, signal=27%
986	PID_PTP1B_PATHWAY	PID_PTP1B_PATHWAY		43	-0.518967	-1.7056	0.00196078	0.0160599	1	861	tags=26%, list=6%, signal=27%
987	REACTOME_INTRINSIC_PATHWAY_FOR_APOPTOSIS	REACTOME_INTRINSIC_PATHWAY_FOR_APOPTOSIS		27	-0.5742	-1.70561	0.00998004	0.0160674	1	1198	tags=33%, list=8%, signal=36%
988	GO_NEGATIVE_REGULATION_OF_LYMPHOCYTE_DIFFERENTIATION	GO_NEGATIVE_REGULATION_OF_LYMPHOCYTE_DIFFERENTIATION		26	-0.581151	-1.70497	0.00817996	0.0161377	1	2432	tags=46%, list=17%, signal=56%
989	PID_IL6_7_PATHWAY	PID_IL6_7_PATHWAY		41	-0.535128	-1.70489	0.00588235	0.0161432	1	1418	tags=37%, list=10%, signal=41%
990	ATF2_UP.V1_DN	ATF2_UP.V1_DN		124	-0.440086	-1.70414	0	0.0162385	1	1345	tags=20%, list=9%, signal=22%
991	GO_NEGATIVE_REGULATION_OF_CELL_PROLIFERATION	GO_NEGATIVE_REGULATION_OF_CELL_PROLIFERATION		438	-0.383002	-1.70406	0	0.0162396	1	1225	tags=17%, list=9%, signal=18%
992	CROMER_METASTASIS_DN	CROMER_METASTASIS_DN		56	-0.497251	-1.70425	0.00194553	0.0162426	1	1528	tags=21%, list=11%, signal=24%
993	WANG_TNF_TARGETS	WANG_TNF_TARGETS		16	-0.665624	-1.70381	0.0109409	0.0162648	1	940	tags=38%, list=7%, signal=40%
994	HAN_JNK_SINGALING_DN	HAN_JNK_SINGALING_DN		26	-0.58566	-1.70231	0.00422833	0.0164869	1	1251	tags=27%, list=9%, signal=29%
995	AKT_UP_MTOR_DN.V1_UP	AKT_UP_MTOR_DN.V1_UP		111	-0.445144	-1.70199	0	0.0165182	1	1584	tags=25%, list=11%, signal=28%
996	NIELSEN_LEIOMYOSARCOMA_UP	NIELSEN_LEIOMYOSARCOMA_UP		15	-0.679988	-1.70171	0.010352	0.0165536	1	1437	tags=33%, list=10%, signal=37%
997	PID_REG_GR_PATHWAY	PID_REG_GR_PATHWAY		64	-0.493451	-1.7016	0.00364964	0.0165609	1	1147	tags=28%, list=8%, signal=30%
998	WU_HBX_TARGETS_2_UP	WU_HBX_TARGETS_2_UP		21	-0.619621	-1.7014	0.00835073	0.0165977	1	1454	tags=24%, list=10%, signal=26%
999	GO_RESPONSE_TO_PROGESTERONE	GO_RESPONSE_TO_PROGESTERONE		34	-0.556961	-1.70063	0.00417537	0.016697	1	1082	tags=32%, list=8%, signal=35%
1000	GO_DEFENSE_RESPONSE_TO_GRAM_POSITIVE_BACTERIUM	GO_DEFENSE_RESPONSE_TO_GRAM_POSITIVE_BACTERIUM		44	-0.538113	-1.7002	0.00561798	0.0167723	1	2221	tags=34%, list=16%, signal=40%
1001	HANN_RESISTANCE_TO_BCL2_INHIBITOR_DN	HANN_RESISTANCE_TO_BCL2_INHIBITOR_DN		33	-0.551301	-1.70015	0.00204082	0.0167724	1	1121	tags=24%, list=8%, signal=26%
1002	GOTZMANN_EPITHELIAL_TO_MESENCHYMAL_TRANSITION_UP	GOTZMANN_EPITHELIAL_TO_MESENCHYMAL_TRANSITION_UP		56	-0.509849	-1.69986	0	0.0168032	1	1228	tags=25%, list=9%, signal=27%
1003	GO_NEGATIVE_REGULATION_OF_CYTOKINE_PRODUCTION_INVOLVED_IN_IMMUNE_RESPONSE	GO_NEGATIVE_REGULATION_OF_CYTOKINE_PRODUCTION_INVOLVED_IN_IMMUNE_RESPONSE		17	-0.658449	-1.69965	0.014553	0.016824	1	1514	tags=35%, list=11%, signal=39%
1004	GO_REGULATION_OF_ACUTE_INFLAMMATORY_RESPONSE	GO_REGULATION_OF_ACUTE_INFLAMMATORY_RESPONSE		49	-0.520478	-1.69951	0.00414079	0.0168376	1	1346	tags=24%, list=9%, signal=27%
1005	GO_RESPONSE_TO_INORGANIC_SUBSTANCE	GO_RESPONSE_TO_INORGANIC_SUBSTANCE		356	-0.387728	-1.6988	0	0.0169161	1	1850	tags=24%, list=13%, signal=26%
1006	GO_ADENYLYLTRANSFERASE_ACTIVITY	GO_ADENYLYLTRANSFERASE_ACTIVITY		20	-0.627204	-1.69894	0.00847458	0.0169162	1	598	tags=25%, list=4%, signal=26%
1007	GO_ENDOTHELIUM_DEVELOPMENT	GO_ENDOTHELIUM_DEVELOPMENT		58	-0.498717	-1.69837	0.0019305	0.0169803	1	1088	tags=21%, list=8%, signal=22%
1008	KEGG_ASTHMA	KEGG_ASTHMA		18	-0.639396	-1.69824	0.00647948	0.016993	1	1189	tags=22%, list=8%, signal=24%
1009	CHR16Q13	CHR16Q13		22	-0.608389	-1.69811	0.0102669	0.0170008	1	1537	tags=27%, list=11%, signal=31%
1010	GO_INFLAMMATORY_RESPONSE_TO_ANTIGENIC_STIMULUS	GO_INFLAMMATORY_RESPONSE_TO_ANTIGENIC_STIMULUS		19	-0.631804	-1.6975	0.0146138	0.0170902	1	1088	tags=32%, list=8%, signal=34%
1011	GO_REGULATION_OF_CAMP_MEDIATED_SIGNALING	GO_REGULATION_OF_CAMP_MEDIATED_SIGNALING		17	-0.640839	-1.69665	0.012685	0.0171952	1	1078	tags=35%, list=8%, signal=38%
1012	REACTOME_SIGNALING_BY_THE_B_CELL_RECEPTOR_BCR	REACTOME_SIGNALING_BY_THE_B_CELL_RECEPTOR_BCR		106	-0.447983	-1.69616	0	0.0172612	1	2108	tags=28%, list=15%, signal=33%
1013	ONDER_CDH1_TARGETS_1_DN	ONDER_CDH1_TARGETS_1_DN		119	-0.447313	-1.69599	0.00183486	0.017272	1	1990	tags=33%, list=14%, signal=38%
1014	BURTON_ADIPOGENESIS_PEAK_AT_8HR	BURTON_ADIPOGENESIS_PEAK_AT_8HR		34	-0.553722	-1.69588	0.012685	0.0172824	1	1342	tags=32%, list=9%, signal=36%
1015	GO_NEGATIVE_REGULATION_OF_ADAPTIVE_IMMUNE_RESPONSE	GO_NEGATIVE_REGULATION_OF_ADAPTIVE_IMMUNE_RESPONSE		25	-0.594031	-1.69545	0.0106157	0.0173416	1	1338	tags=28%, list=9%, signal=31%
1016	GO_REGULATION_OF_IMMUNOGLOBULIN_PRODUCTION	GO_REGULATION_OF_IMMUNOGLOBULIN_PRODUCTION		33	-0.543746	-1.69526	0.0189076	0.017366	1	1380	tags=30%, list=10%, signal=33%
1017	GO_CYSTEINE_TYPE_ENDOPEPTIDASE_INHIBITOR_ACTIVITY_INVOLVED_IN_APOPTOTIC_PROCESS	GO_CYSTEINE_TYPE_ENDOPEPTIDASE_INHIBITOR_ACTIVITY_INVOLVED_IN_APOPTOTIC_PROCESS		15	-0.663903	-1.69512	0.00875273	0.017384	1	533	tags=27%, list=4%, signal=28%
1018	JOHNSTONE_PARVB_TARGETS_3_UP	JOHNSTONE_PARVB_TARGETS_3_UP		341	-0.389578	-1.69473	0	0.0174247	1	1647	tags=19%, list=12%, signal=21%
1019	PID_CD8_TCR_DOWNSTREAM_PATHWAY	PID_CD8_TCR_DOWNSTREAM_PATHWAY		51	-0.513276	-1.69477	0.00385356	0.0174285	1	1841	tags=39%, list=13%, signal=45%
1020	WESTON_VEGFA_TARGETS_3HR	WESTON_VEGFA_TARGETS_3HR		50	-0.514858	-1.69454	0.00195312	0.0174424	1	2164	tags=34%, list=15%, signal=40%
1021	GO_POSITIVE_REGULATION_OF_CYCLIC_NUCLEOTIDE_METABOLIC_PROCESS	GO_POSITIVE_REGULATION_OF_CYCLIC_NUCLEOTIDE_METABOLIC_PROCESS		51	-0.512767	-1.69411	0.00392157	0.017498	1	1078	tags=22%, list=8%, signal=23%
1022	GO_HIPPO_SIGNALING	GO_HIPPO_SIGNALING		20	-0.61397	-1.6938	0.00840336	0.0175366	1	1868	tags=40%, list=13%, signal=46%
1023	GO_IMMUNE_RESPONSE_REGULATING_CELL_SURFACE_RECEPTOR_SIGNALING_PATHWAY	GO_IMMUNE_RESPONSE_REGULATING_CELL_SURFACE_RECEPTOR_SIGNALING_PATHWAY		245	-0.404038	-1.69372	0	0.0175404	1	2808	tags=35%, list=20%, signal=43%
1024	NABA_ECM_GLYCOPROTEINS	NABA_ECM_GLYCOPROTEINS		82	-0.466167	-1.69266	0	0.0177032	1	3117	tags=35%, list=22%, signal=45%
1025	HOFMANN_MYELODYSPLASTIC_SYNDROM_LOW_RISK_UP	HOFMANN_MYELODYSPLASTIC_SYNDROM_LOW_RISK_UP		15	-0.676801	-1.69218	0.0127119	0.0177917	1	1556	tags=47%, list=11%, signal=52%
1026	CHR1P22	CHR1P22		52	-0.506939	-1.69047	0	0.0180823	1	217	tags=13%, list=2%, signal=14%
1027	SHAFFER_IRF4_MULTIPLE_MYELOMA_PROGRAM	SHAFFER_IRF4_MULTIPLE_MYELOMA_PROGRAM		31	-0.575866	-1.69054	0.00773694	0.0180851	1	1426	tags=35%, list=10%, signal=39%
1028	GO_NEGATIVE_REGULATION_OF_INTERFERON_GAMMA_PRODUCTION	GO_NEGATIVE_REGULATION_OF_INTERFERON_GAMMA_PRODUCTION		25	-0.594817	-1.68946	0.0147679	0.0182383	1	581	tags=20%, list=4%, signal=21%
1029	STAT5B_01	STAT5B_01		146	-0.429923	-1.68898	0	0.0183052	1	968	tags=17%, list=7%, signal=18%
1030	GO_NON_MEMBRANE_SPANNING_PROTEIN_TYROSINE_KINASE_ACTIVITY	GO_NON_MEMBRANE_SPANNING_PROTEIN_TYROSINE_KINASE_ACTIVITY		35	-0.549156	-1.68881	0.0102041	0.0183268	1	1281	tags=31%, list=9%, signal=34%
1031	BIOCARTA_PDGF_PATHWAY	BIOCARTA_PDGF_PATHWAY		31	-0.554834	-1.68757	0.00978474	0.0184992	1	1182	tags=35%, list=8%, signal=39%
1032	GO_LYMPHOCYTE_COSTIMULATION	GO_LYMPHOCYTE_COSTIMULATION		54	-0.500656	-1.68759	0	0.0185049	1	2491	tags=31%, list=18%, signal=38%
1033	GARGALOVIC_RESPONSE_TO_OXIDIZED_PHOSPHOLIPIDS_RED_UP	GARGALOVIC_RESPONSE_TO_OXIDIZED_PHOSPHOLIPIDS_RED_UP		15	-0.676311	-1.68727	0.00980392	0.0185525	1	3611	tags=73%, list=25%, signal=98%
1034	GENTILE_UV_HIGH_DOSE_UP	GENTILE_UV_HIGH_DOSE_UP		20	-0.62913	-1.68651	0.00631579	0.0186731	1	1384	tags=35%, list=10%, signal=39%
1035	GO_POSITIVE_REGULATION_OF_ACUTE_INFLAMMATORY_RESPONSE	GO_POSITIVE_REGULATION_OF_ACUTE_INFLAMMATORY_RESPONSE		20	-0.614961	-1.6861	0.0165975	0.0187436	1	990	tags=40%, list=7%, signal=43%
1036	GO_REGULATION_OF_MUSCLE_CONTRACTION	GO_REGULATION_OF_MUSCLE_CONTRACTION		87	-0.463157	-1.68593	0	0.0187642	1	1446	tags=23%, list=10%, signal=25%
1037	GO_CELLULAR_DEFENSE_RESPONSE	GO_CELLULAR_DEFENSE_RESPONSE		37	-0.533662	-1.6858	0.00384615	0.0187764	1	2777	tags=46%, list=20%, signal=57%
1038	GO_CELL_ACTIVATION_INVOLVED_IN_IMMUNE_RESPONSE	GO_CELL_ACTIVATION_INVOLVED_IN_IMMUNE_RESPONSE		97	-0.454341	-1.68517	0.00182815	0.0188815	1	1127	tags=26%, list=8%, signal=28%
1039	SCHEIDEREIT_IKK_TARGETS	SCHEIDEREIT_IKK_TARGETS		15	-0.66469	-1.68524	0.0170576	0.0188885	1	721	tags=40%, list=5%, signal=42%
1040	GO_REGULATION_OF_PROTEIN_BINDING	GO_REGULATION_OF_PROTEIN_BINDING		130	-0.430664	-1.68495	0	0.0189156	1	1057	tags=16%, list=7%, signal=17%
1041	CHIARADONNA_NEOPLASTIC_TRANSFORMATION_CDC25_UP	CHIARADONNA_NEOPLASTIC_TRANSFORMATION_CDC25_UP		90	-0.457807	-1.68485	0	0.0189221	1	2286	tags=32%, list=16%, signal=38%
1042	RIGGINS_TAMOXIFEN_RESISTANCE_DN	RIGGINS_TAMOXIFEN_RESISTANCE_DN		170	-0.414853	-1.68456	0	0.0189695	1	1953	tags=26%, list=14%, signal=30%
1043	KAECH_NAIVE_VS_DAY15_EFF_CD8_TCELL_DN	KAECH_NAIVE_VS_DAY15_EFF_CD8_TCELL_DN		167	-0.418402	-1.68417	0	0.0190281	1	2199	tags=24%, list=15%, signal=28%
1044	GO_RESPONSE_TO_OXYGEN_LEVELS	GO_RESPONSE_TO_OXYGEN_LEVELS		226	-0.403546	-1.68409	0	0.0190317	1	1652	tags=21%, list=12%, signal=24%
1045	YAO_TEMPORAL_RESPONSE_TO_PROGESTERONE_CLUSTER_9	YAO_TEMPORAL_RESPONSE_TO_PROGESTERONE_CLUSTER_9		55	-0.493117	-1.68367	0	0.0191115	1	1096	tags=18%, list=8%, signal=20%
1046	ERB2_UP.V1_DN	ERB2_UP.V1_DN		146	-0.420386	-1.68321	0	0.0191923	1	1682	tags=25%, list=12%, signal=28%
1047	GO_RESPONSE_TO_GROWTH_HORMONE	GO_RESPONSE_TO_GROWTH_HORMONE		21	-0.615125	-1.68268	0.0243363	0.0192849	1	815	tags=38%, list=6%, signal=40%
1048	WINTER_HYPOXIA_METAGENE	WINTER_HYPOXIA_METAGENE		179	-0.415245	-1.6823	0	0.0193238	1	1514	tags=26%, list=11%, signal=28%
1049	GREGORY_SYNTHETIC_LETHAL_WITH_IMATINIB	GREGORY_SYNTHETIC_LETHAL_WITH_IMATINIB		107	-0.441975	-1.68215	0	0.0193239	1	1446	tags=22%, list=10%, signal=25%
1050	GO_MESODERM_DEVELOPMENT	GO_MESODERM_DEVELOPMENT		70	-0.482931	-1.6824	0.00192308	0.0193271	1	2120	tags=31%, list=15%, signal=37%
1051	GO_REGULATION_OF_CALCIUM_ION_TRANSPORT_INTO_CYTOSOL	GO_REGULATION_OF_CALCIUM_ION_TRANSPORT_INTO_CYTOSOL		54	-0.492488	-1.68201	0.00557621	0.0193453	1	1446	tags=20%, list=10%, signal=23%
1052	GO_LUNG_ALVEOLUS_DEVELOPMENT	GO_LUNG_ALVEOLUS_DEVELOPMENT		28	-0.571441	-1.68177	0.0019685	0.0193838	1	1812	tags=46%, list=13%, signal=53%
1053	VALK_AML_CLUSTER_11	VALK_AML_CLUSTER_11		29	-0.578486	-1.68149	0.012024	0.0194175	1	1309	tags=34%, list=9%, signal=38%
1054	GO_REGULATION_OF_LIPID_KINASE_ACTIVITY	GO_REGULATION_OF_LIPID_KINASE_ACTIVITY		36	-0.543306	-1.68151	0.00824742	0.0194237	1	1393	tags=36%, list=10%, signal=40%
1055	JAATINEN_HEMATOPOIETIC_STEM_CELL_DN	JAATINEN_HEMATOPOIETIC_STEM_CELL_DN		178	-0.416538	-1.68098	0	0.0195251	1	1351	tags=20%, list=10%, signal=22%
1056	NIELSEN_GIST_AND_SYNOVIAL_SARCOMA_DN	NIELSEN_GIST_AND_SYNOVIAL_SARCOMA_DN		17	-0.636375	-1.68039	0.0237581	0.0196292	1	142	tags=18%, list=1%, signal=18%
1057	KAN_RESPONSE_TO_ARSENIC_TRIOXIDE	KAN_RESPONSE_TO_ARSENIC_TRIOXIDE		92	-0.455894	-1.67989	0	0.0196822	1	1537	tags=27%, list=11%, signal=30%
1058	SA_CASPASE_CASCADE	SA_CASPASE_CASCADE		18	-0.643117	-1.67968	0.00631579	0.0197211	1	1707	tags=56%, list=12%, signal=63%
1059	BOHN_PRIMARY_IMMUNODEFICIENCY_SYNDROM_DN	BOHN_PRIMARY_IMMUNODEFICIENCY_SYNDROM_DN		37	-0.536541	-1.67903	0.00613497	0.0198136	1	1273	tags=30%, list=9%, signal=33%
1060	GOLDRATH_IMMUNE_MEMORY	GOLDRATH_IMMUNE_MEMORY		53	-0.495924	-1.67848	0.00406504	0.0198789	1	641	tags=17%, list=5%, signal=18%
1061	GO_REGULATION_OF_TRANSFORMING_GROWTH_FACTOR_BETA_PRODUCTION	GO_REGULATION_OF_TRANSFORMING_GROWTH_FACTOR_BETA_PRODUCTION		17	-0.639059	-1.67836	0.0130435	0.0198889	1	2568	tags=53%, list=18%, signal=65%
1062	GO_REGULATION_OF_STRIATED_MUSCLE_CELL_DIFFERENTIATION	GO_REGULATION_OF_STRIATED_MUSCLE_CELL_DIFFERENTIATION		50	-0.504719	-1.67759	0.00191571	0.0199846	1	2050	tags=38%, list=14%, signal=44%
1063	GO_NEGATIVE_REGULATION_OF_ANOIKIS	GO_NEGATIVE_REGULATION_OF_ANOIKIS		16	-0.645563	-1.67713	0.02079	0.0200614	1	1397	tags=38%, list=10%, signal=42%
1064	GO_REGULATION_OF_ENDOTHELIAL_CELL_MIGRATION	GO_REGULATION_OF_ENDOTHELIAL_CELL_MIGRATION		79	-0.4627	-1.67684	0.00185529	0.0201127	1	1704	tags=28%, list=12%, signal=31%
1065	CHR7P14	CHR7P14		22	-0.603734	-1.67675	0.0165631	0.0201192	1	777	tags=23%, list=5%, signal=24%
1066	WOO_LIVER_CANCER_RECURRENCE_UP	WOO_LIVER_CANCER_RECURRENCE_UP		86	-0.462559	-1.67653	0.0019305	0.0201361	1	580	tags=14%, list=4%, signal=14%
1067	NADLER_OBESITY_UP	NADLER_OBESITY_UP		50	-0.503883	-1.67655	0.0078125	0.0201426	1	521	tags=10%, list=4%, signal=10%
1068	GAUSSMANN_MLL_AF4_FUSION_TARGETS_F_UP	GAUSSMANN_MLL_AF4_FUSION_TARGETS_F_UP		120	-0.436189	-1.67555	0	0.0203197	1	2047	tags=28%, list=14%, signal=32%
1069	SIG_CD40PATHWAYMAP	SIG_CD40PATHWAYMAP		27	-0.5719	-1.67499	0.012	0.0204116	1	951	tags=26%, list=7%, signal=28%
1070	GO_RESPONSE_TO_HYDROPEROXIDE	GO_RESPONSE_TO_HYDROPEROXIDE		15	-0.677067	-1.67494	0.0214133	0.0204117	1	1051	tags=27%, list=7%, signal=29%
1071	CHR6P25	CHR6P25		25	-0.596133	-1.67501	0.0137525	0.0204209	1	1046	tags=32%, list=7%, signal=34%
1072	KEGG_PATHWAYS_IN_CANCER	KEGG_PATHWAYS_IN_CANCER		245	-0.400878	-1.67467	0	0.0204498	1	1833	tags=24%, list=13%, signal=27%
1073	GO_POSITIVE_REGULATION_OF_ENDOTHELIAL_CELL_MIGRATION	GO_POSITIVE_REGULATION_OF_ENDOTHELIAL_CELL_MIGRATION		49	-0.511473	-1.67401	0.00610998	0.0205505	1	1704	tags=31%, list=12%, signal=35%
1074	CHIANG_LIVER_CANCER_SUBCLASS_INTERFERON_UP	CHIANG_LIVER_CANCER_SUBCLASS_INTERFERON_UP		19	-0.622281	-1.67389	0.0193548	0.0205527	1	1305	tags=37%, list=9%, signal=41%
1075	TONKS_TARGETS_OF_RUNX1_RUNX1T1_FUSION_HSC_UP	TONKS_TARGETS_OF_RUNX1_RUNX1T1_FUSION_HSC_UP		150	-0.425745	-1.67393	0.00174216	0.0205574	1	1535	tags=25%, list=11%, signal=28%
1076	ACOSTA_PROLIFERATION_INDEPENDENT_MYC_TARGETS_DN	ACOSTA_PROLIFERATION_INDEPENDENT_MYC_TARGETS_DN		93	-0.451732	-1.67375	0.00559702	0.0205669	1	2053	tags=31%, list=14%, signal=36%
1077	RAF_UP.V1_UP	RAF_UP.V1_UP		149	-0.427209	-1.67327	0.00186567	0.0206485	1	1474	tags=23%, list=10%, signal=26%
1078	CONCANNON_APOPTOSIS_BY_EPOXOMICIN_UP	CONCANNON_APOPTOSIS_BY_EPOXOMICIN_UP		185	-0.406474	-1.6729	0.00180832	0.0206975	1	1514	tags=21%, list=11%, signal=23%
1079	GO_REGULATION_OF_INTERLEUKIN_10_PRODUCTION	GO_REGULATION_OF_INTERLEUKIN_10_PRODUCTION		29	-0.565272	-1.67252	0.00986193	0.0207601	1	1104	tags=31%, list=8%, signal=34%
1080	CHICAS_RB1_TARGETS_CONFLUENT	CHICAS_RB1_TARGETS_CONFLUENT		390	-0.380402	-1.67236	0	0.0207796	1	2048	tags=23%, list=14%, signal=26%
1081	CHR11P13	CHR11P13		21	-0.599775	-1.67147	0.0212355	0.0209143	1	1467	tags=43%, list=10%, signal=48%
1082	GO_POSITIVE_REGULATION_OF_KINASE_ACTIVITY	GO_POSITIVE_REGULATION_OF_KINASE_ACTIVITY		343	-0.381234	-1.67123	0	0.0209363	1	1606	tags=20%, list=11%, signal=22%
1083	GO_B_CELL_MEDIATED_IMMUNITY	GO_B_CELL_MEDIATED_IMMUNITY		50	-0.504989	-1.66907	0.00390625	0.0213366	1	1448	tags=24%, list=10%, signal=27%
1084	GO_POSITIVE_REGULATION_OF_PROTEIN_LOCALIZATION_TO_NUCLEUS	GO_POSITIVE_REGULATION_OF_PROTEIN_LOCALIZATION_TO_NUCLEUS		100	-0.449121	-1.66854	0.00193424	0.0214175	1	1304	tags=23%, list=9%, signal=25%
1085	GO_PLATELET_DERIVED_GROWTH_FACTOR_RECEPTOR_SIGNALING_PATHWAY	GO_PLATELET_DERIVED_GROWTH_FACTOR_RECEPTOR_SIGNALING_PATHWAY		32	-0.553673	-1.66858	0.01417	0.0214179	1	2256	tags=41%, list=16%, signal=48%
1086	GO_GROWTH_FACTOR_BINDING	GO_GROWTH_FACTOR_BINDING		82	-0.461069	-1.66723	0	0.0216338	1	3117	tags=38%, list=22%, signal=48%
1087	GO_NEGATIVE_REGULATION_OF_CHEMOTAXIS	GO_NEGATIVE_REGULATION_OF_CHEMOTAXIS		35	-0.538657	-1.66716	0.00428265	0.0216373	1	2164	tags=37%, list=15%, signal=44%
1088	DARWICHE_SQUAMOUS_CELL_CARCINOMA_UP	DARWICHE_SQUAMOUS_CELL_CARCINOMA_UP		95	-0.44632	-1.6673	0.00182815	0.021646	1	1170	tags=17%, list=8%, signal=18%
1089	CADWELL_ATG16L1_TARGETS_UP	CADWELL_ATG16L1_TARGETS_UP		55	-0.483544	-1.66675	0.00589391	0.0216975	1	1512	tags=15%, list=11%, signal=16%
1090	GO_T_CELL_SELECTION	GO_T_CELL_SELECTION		27	-0.564894	-1.66675	0.0210526	0.0217086	1	673	tags=26%, list=5%, signal=27%
1091	REACTOME_CLASS_B_2_SECRETIN_FAMILY_RECEPTORS	REACTOME_CLASS_B_2_SECRETIN_FAMILY_RECEPTORS		33	-0.544198	-1.66596	0.0104384	0.0218335	1	2287	tags=39%, list=16%, signal=47%
1092	GO_NEGATIVE_REGULATION_OF_HYDROLASE_ACTIVITY	GO_NEGATIVE_REGULATION_OF_HYDROLASE_ACTIVITY		235	-0.394257	-1.66598	0	0.0218407	1	1721	tags=21%, list=12%, signal=23%
1093	SMIRNOV_RESPONSE_TO_IR_6HR_UP	SMIRNOV_RESPONSE_TO_IR_6HR_UP		128	-0.425581	-1.666	0	0.0218478	1	1607	tags=24%, list=11%, signal=27%
1094	GRAESSMANN_RESPONSE_TO_MC_AND_SERUM_DEPRIVATION_DN	GRAESSMANN_RESPONSE_TO_MC_AND_SERUM_DEPRIVATION_DN		56	-0.484572	-1.66404	0.00592885	0.0221822	1	1380	tags=25%, list=10%, signal=28%
1095	BRACHAT_RESPONSE_TO_CAMPTOTHECIN_DN	BRACHAT_RESPONSE_TO_CAMPTOTHECIN_DN		37	-0.534518	-1.66393	0.00863931	0.0221894	1	1850	tags=27%, list=13%, signal=31%
1096	GERHOLD_ADIPOGENESIS_DN	GERHOLD_ADIPOGENESIS_DN		57	-0.493368	-1.66405	0.00204918	0.0221915	1	1142	tags=21%, list=8%, signal=23%
1097	GOLUB_ALL_VS_AML_DN	GOLUB_ALL_VS_AML_DN		20	-0.62035	-1.66266	0.012848	0.0223605	1	1038	tags=25%, list=7%, signal=27%
1098	GO_POSITIVE_REGULATION_OF_EPITHELIAL_CELL_MIGRATION	GO_POSITIVE_REGULATION_OF_EPITHELIAL_CELL_MIGRATION		76	-0.46587	-1.6627	0.00571429	0.0223606	1	1704	tags=26%, list=12%, signal=30%
1099	ENK_UV_RESPONSE_KERATINOCYTE_UP	ENK_UV_RESPONSE_KERATINOCYTE_UP		424	-0.372794	-1.66249	0	0.0223713	1	1583	tags=15%, list=11%, signal=16%
1100	GO_NEGATIVE_REGULATION_OF_MUSCLE_CELL_DIFFERENTIATION	GO_NEGATIVE_REGULATION_OF_MUSCLE_CELL_DIFFERENTIATION		36	-0.542461	-1.66228	0.011811	0.0223895	1	1210	tags=31%, list=9%, signal=33%
1101	MARTINEZ_RESPONSE_TO_TRABECTEDIN_UP	MARTINEZ_RESPONSE_TO_TRABECTEDIN_UP		57	-0.489677	-1.66135	0.00583658	0.0225613	1	1387	tags=18%, list=10%, signal=19%
1102	GO_VASCULAR_PROCESS_IN_CIRCULATORY_SYSTEM	GO_VASCULAR_PROCESS_IN_CIRCULATORY_SYSTEM		82	-0.457081	-1.66108	0	0.0226098	1	945	tags=16%, list=7%, signal=17%
1103	CTATGCA_MIR153	CTATGCA_MIR153		154	-0.416975	-1.66065	0.00176056	0.0226879	1	2008	tags=29%, list=14%, signal=34%
1104	WANG_SMARCE1_TARGETS_UP	WANG_SMARCE1_TARGETS_UP		194	-0.401093	-1.65993	0	0.0228283	1	2037	tags=23%, list=14%, signal=26%
1105	GO_REGULATION_OF_THYMOCYTE_AGGREGATION	GO_REGULATION_OF_THYMOCYTE_AGGREGATION		18	-0.637924	-1.65933	0.0125523	0.0229163	1	546	tags=33%, list=4%, signal=35%
1106	GO_EPIDERMIS_DEVELOPMENT	GO_EPIDERMIS_DEVELOPMENT		122	-0.428812	-1.65947	0.00177936	0.0229163	1	1868	tags=25%, list=13%, signal=28%
1107	GO_NEGATIVE_REGULATION_OF_SECRETION	GO_NEGATIVE_REGULATION_OF_SECRETION		118	-0.432068	-1.65883	0	0.0230063	1	1611	tags=20%, list=11%, signal=23%
1108	GO_MESODERM_MORPHOGENESIS	GO_MESODERM_MORPHOGENESIS		38	-0.528914	-1.65861	0.00576923	0.0230371	1	2120	tags=29%, list=15%, signal=34%
1109	RICKMAN_HEAD_AND_NECK_CANCER_C	RICKMAN_HEAD_AND_NECK_CANCER_C		51	-0.49168	-1.65801	0	0.0231529	1	1723	tags=31%, list=12%, signal=36%
1110	GO_NEGATIVE_REGULATION_OF_CELL_CELL_ADHESION	GO_NEGATIVE_REGULATION_OF_CELL_CELL_ADHESION		96	-0.449371	-1.65774	0.00193424	0.0232072	1	1127	tags=18%, list=8%, signal=19%
1111	SENESE_HDAC2_TARGETS_UP	SENESE_HDAC2_TARGETS_UP		95	-0.441535	-1.65704	0	0.023313	1	1043	tags=19%, list=7%, signal=20%
1112	GO_REGULATION_OF_CELLULAR_PROTEIN_LOCALIZATION	GO_REGULATION_OF_CELLULAR_PROTEIN_LOCALIZATION		421	-0.374766	-1.65706	0	0.0233168	1	1707	tags=20%, list=12%, signal=23%
1113	GO_REGULATION_OF_T_CELL_RECEPTOR_SIGNALING_PATHWAY	GO_REGULATION_OF_T_CELL_RECEPTOR_SIGNALING_PATHWAY		24	-0.588822	-1.65707	0.0189474	0.0233286	1	1127	tags=29%, list=8%, signal=32%
1114	GO_AGING	GO_AGING		199	-0.405594	-1.65652	0	0.0234079	1	1225	tags=18%, list=9%, signal=19%
1115	CHR4Q21	CHR4Q21		52	-0.495864	-1.65635	0.01222	0.0234403	1	1194	tags=21%, list=8%, signal=23%
1116	ABBUD_LIF_SIGNALING_1_DN	ABBUD_LIF_SIGNALING_1_DN		18	-0.624049	-1.65608	0.022449	0.0234981	1	149	tags=11%, list=1%, signal=11%
1117	REACTOME_TRIF_MEDIATED_TLR3_SIGNALING	REACTOME_TRIF_MEDIATED_TLR3_SIGNALING		59	-0.480975	-1.65539	0.00770713	0.0236247	1	1565	tags=29%, list=11%, signal=32%
1118	GO_LYMPHOCYTE_HOMEOSTASIS	GO_LYMPHOCYTE_HOMEOSTASIS		34	-0.538962	-1.6552	0.0155945	0.0236602	1	1127	tags=29%, list=8%, signal=32%
1119	GO_POSITIVE_REGULATION_OF_ORGANELLE_ASSEMBLY	GO_POSITIVE_REGULATION_OF_ORGANELLE_ASSEMBLY		35	-0.532602	-1.65501	0.0157171	0.023682	1	940	tags=17%, list=7%, signal=18%
1120	GO_REGULATION_OF_WOUND_HEALING	GO_REGULATION_OF_WOUND_HEALING		77	-0.461621	-1.65484	0.00378072	0.023692	1	1051	tags=22%, list=7%, signal=24%
1121	GO_NEGATIVE_REGULATION_OF_TUMOR_NECROSIS_FACTOR_SUPERFAMILY_CYTOKINE_PRODUCTION	GO_NEGATIVE_REGULATION_OF_TUMOR_NECROSIS_FACTOR_SUPERFAMILY_CYTOKINE_PRODUCTION		30	-0.553837	-1.65484	0.0043384	0.0237032	1	809	tags=23%, list=6%, signal=25%
1122	GO_RESPONSE_TO_GAMMA_RADIATION	GO_RESPONSE_TO_GAMMA_RADIATION		44	-0.516787	-1.65469	0.0020202	0.0237145	1	1358	tags=27%, list=10%, signal=30%
1123	GO_REGULATION_OF_CELL_SHAPE	GO_REGULATION_OF_CELL_SHAPE		100	-0.441787	-1.65454	0	0.0237421	1	1275	tags=23%, list=9%, signal=25%
1124	GO_REGULATION_OF_ION_HOMEOSTASIS	GO_REGULATION_OF_ION_HOMEOSTASIS		128	-0.42593	-1.6541	0.0019084	0.0238284	1	1446	tags=20%, list=10%, signal=22%
1125	REACTOME_ACTIVATION_OF_BH3_ONLY_PROTEINS	REACTOME_ACTIVATION_OF_BH3_ONLY_PROTEINS		16	-0.631013	-1.6539	0.0253165	0.0238478	1	1044	tags=31%, list=7%, signal=34%
1126	BOQUEST_STEM_CELL_DN	BOQUEST_STEM_CELL_DN		142	-0.418565	-1.65393	0.00356506	0.0238552	1	1339	tags=19%, list=9%, signal=21%
1127	CCATCCA_MIR432	CCATCCA_MIR432		43	-0.5035	-1.65377	0.00603622	0.023867	1	2251	tags=33%, list=16%, signal=39%
1128	GO_RESPONSE_TO_GONADOTROPIN	GO_RESPONSE_TO_GONADOTROPIN		20	-0.624805	-1.6536	0.0234043	0.0238845	1	2885	tags=45%, list=20%, signal=56%
1129	GO_NEGATIVE_REGULATION_OF_PROTEIN_BINDING	GO_NEGATIVE_REGULATION_OF_PROTEIN_BINDING		61	-0.474619	-1.65347	0.00775194	0.0238923	1	1057	tags=16%, list=7%, signal=18%
1130	GO_ENDOCRINE_PANCREAS_DEVELOPMENT	GO_ENDOCRINE_PANCREAS_DEVELOPMENT		19	-0.61161	-1.65348	0.012766	0.0239009	1	1463	tags=32%, list=10%, signal=35%
1131	OLSSON_E2F3_TARGETS_DN	OLSSON_E2F3_TARGETS_DN		36	-0.539915	-1.6534	0.018595	0.0239011	1	654	tags=22%, list=5%, signal=23%
1132	GO_PROTEIN_SELF_ASSOCIATION	GO_PROTEIN_SELF_ASSOCIATION		32	-0.544547	-1.65323	0.017316	0.0239279	1	247	tags=13%, list=2%, signal=13%
1133	GO_POSITIVE_REGULATION_OF_PROTEIN_SERINE_THREONINE_KINASE_ACTIVITY	GO_POSITIVE_REGULATION_OF_PROTEIN_SERINE_THREONINE_KINASE_ACTIVITY		204	-0.398949	-1.65308	0	0.0239378	1	1606	tags=22%, list=11%, signal=24%
1134	HOSHIDA_LIVER_CANCER_LATE_RECURRENCE_UP	HOSHIDA_LIVER_CANCER_LATE_RECURRENCE_UP		45	-0.508034	-1.65293	0.00394477	0.0239494	1	1789	tags=27%, list=13%, signal=30%
1135	GO_NEGATIVE_REGULATION_OF_INTRACELLULAR_TRANSPORT	GO_NEGATIVE_REGULATION_OF_INTRACELLULAR_TRANSPORT		107	-0.435772	-1.65261	0	0.0240008	1	2077	tags=29%, list=15%, signal=34%
1136	EIF4E_DN	EIF4E_DN		78	-0.462182	-1.65245	0.00195312	0.0240146	1	1523	tags=28%, list=11%, signal=31%
1137	GAUSSMANN_MLL_AF4_FUSION_TARGETS_E_UP	GAUSSMANN_MLL_AF4_FUSION_TARGETS_E_UP		57	-0.489505	-1.65218	0.0116279	0.0240403	1	1454	tags=30%, list=10%, signal=33%
1138	GO_POSITIVE_REGULATION_OF_NUCLEOTIDE_METABOLIC_PROCESS	GO_POSITIVE_REGULATION_OF_NUCLEOTIDE_METABOLIC_PROCESS		67	-0.467043	-1.65225	0.00785855	0.0240413	1	1078	tags=19%, list=8%, signal=21%
1139	GO_NEGATIVE_REGULATION_OF_PROTEIN_MATURATION	GO_NEGATIVE_REGULATION_OF_PROTEIN_MATURATION		26	-0.572422	-1.65199	0.00817996	0.0240745	1	1512	tags=31%, list=11%, signal=34%
1140	GO_RESPONSE_TO_NUTRIENT	GO_RESPONSE_TO_NUTRIENT		147	-0.416574	-1.6519	0.00179211	0.0240831	1	1097	tags=14%, list=8%, signal=15%
1141	CEBP_C	CEBP_C		127	-0.427058	-1.65146	0.00191571	0.0241129	1	1661	tags=25%, list=12%, signal=28%
1142	IL2_UP.V1_UP	IL2_UP.V1_UP		119	-0.426243	-1.65159	0	0.0241311	1	1400	tags=30%, list=10%, signal=33%
1143	BENPORATH_ES_CORE_NINE_CORRELATED	BENPORATH_ES_CORE_NINE_CORRELATED		81	-0.458881	-1.65153	0.00938086	0.0241326	1	2227	tags=33%, list=16%, signal=39%
1144	HUPER_BREAST_BASAL_VS_LUMINAL_DN	HUPER_BREAST_BASAL_VS_LUMINAL_DN		33	-0.537585	-1.6512	0.00819672	0.0241559	1	3251	tags=45%, list=23%, signal=59%
1145	SHARMA_PILOCYTIC_ASTROCYTOMA_LOCATION_UP	SHARMA_PILOCYTIC_ASTROCYTOMA_LOCATION_UP		15	-0.644145	-1.65104	0.0146138	0.0241728	1	1894	tags=40%, list=13%, signal=46%
1146	GO_REGULATION_OF_SMOOTH_MUSCLE_CONTRACTION	GO_REGULATION_OF_SMOOTH_MUSCLE_CONTRACTION		31	-0.549333	-1.65092	0.0123457	0.0241819	1	1210	tags=29%, list=9%, signal=32%
1147	LEE_LIVER_CANCER_CIPROFIBRATE_DN	LEE_LIVER_CANCER_CIPROFIBRATE_DN		35	-0.531218	-1.65007	0.013834	0.0243593	1	1565	tags=29%, list=11%, signal=32%
1148	PID_EPO_PATHWAY	PID_EPO_PATHWAY		32	-0.546027	-1.65004	0.00982318	0.0243601	1	1198	tags=31%, list=8%, signal=34%
1149	GO_REGULATION_OF_NATURAL_KILLER_CELL_MEDIATED_IMMUNITY	GO_REGULATION_OF_NATURAL_KILLER_CELL_MEDIATED_IMMUNITY		25	-0.580021	-1.64907	0.0151515	0.0245342	1	2621	tags=56%, list=18%, signal=69%
1150	KLEIN_TARGETS_OF_BCR_ABL1_FUSION	KLEIN_TARGETS_OF_BCR_ABL1_FUSION		34	-0.54609	-1.64895	0.00412371	0.0245559	1	1645	tags=35%, list=12%, signal=40%
1151	GO_LEUKOCYTE_DIFFERENTIATION	GO_LEUKOCYTE_DIFFERENTIATION		214	-0.396925	-1.64886	0	0.0245578	1	1276	tags=24%, list=9%, signal=26%
1152	PICCALUGA_ANGIOIMMUNOBLASTIC_LYMPHOMA_UP	PICCALUGA_ANGIOIMMUNOBLASTIC_LYMPHOMA_UP		150	-0.417358	-1.64794	0	0.0247534	1	1108	tags=18%, list=8%, signal=19%
1153	PUIFFE_INVASION_INHIBITED_BY_ASCITES_DN	PUIFFE_INVASION_INHIBITED_BY_ASCITES_DN		117	-0.424206	-1.64797	0	0.024756	1	1103	tags=16%, list=8%, signal=17%
1154	GAVIN_IL2_RESPONSIVE_FOXP3_TARGETS_UP	GAVIN_IL2_RESPONSIVE_FOXP3_TARGETS_UP		16	-0.64845	-1.64721	0.012959	0.0248921	1	1000	tags=31%, list=7%, signal=34%
1155	GO_DIVALENT_INORGANIC_CATION_HOMEOSTASIS	GO_DIVALENT_INORGANIC_CATION_HOMEOSTASIS		202	-0.400151	-1.64686	0	0.0249635	1	2275	tags=25%, list=16%, signal=29%
1156	SMITH_TERT_TARGETS_DN	SMITH_TERT_TARGETS_DN		71	-0.466753	-1.64674	0.00193424	0.0249656	1	488	tags=11%, list=3%, signal=12%
1157	GO_PEPTIDE_HORMONE_PROCESSING	GO_PEPTIDE_HORMONE_PROCESSING		17	-0.632085	-1.64645	0.0173536	0.0250141	1	3477	tags=53%, list=25%, signal=70%
1158	BIOCARTA_TID_PATHWAY	BIOCARTA_TID_PATHWAY		18	-0.634428	-1.64538	0.0319149	0.025218	1	1069	tags=39%, list=8%, signal=42%
1159	ADDYA_ERYTHROID_DIFFERENTIATION_BY_HEMIN	ADDYA_ERYTHROID_DIFFERENTIATION_BY_HEMIN		66	-0.472727	-1.6436	0.00579151	0.0256284	1	1799	tags=38%, list=13%, signal=43%
1160	ZHONG_SECRETOME_OF_LUNG_CANCER_AND_ENDOTHELIUM	ZHONG_SECRETOME_OF_LUNG_CANCER_AND_ENDOTHELIUM		55	-0.486051	-1.64259	0.00559702	0.0258136	1	402	tags=9%, list=3%, signal=9%
1161	STOSSI_RESPONSE_TO_ESTRADIOL	STOSSI_RESPONSE_TO_ESTRADIOL		30	-0.551517	-1.64129	0.00784314	0.0261355	1	1365	tags=33%, list=10%, signal=37%
1162	PID_IL1_PATHWAY	PID_IL1_PATHWAY		30	-0.541956	-1.64082	0.0116279	0.0262117	1	1418	tags=33%, list=10%, signal=37%
1163	GO_REGULATION_OF_INTRACELLULAR_PROTEIN_TRANSPORT	GO_REGULATION_OF_INTRACELLULAR_PROTEIN_TRANSPORT		282	-0.381308	-1.64084	0	0.0262175	1	1693	tags=22%, list=12%, signal=24%
1164	REACTOME_ACTIVATED_TLR4_SIGNALLING	REACTOME_ACTIVATED_TLR4_SIGNALLING		78	-0.457046	-1.63978	0.00383877	0.0264369	1	1146	tags=23%, list=8%, signal=25%
1165	TBK1.DF_UP	TBK1.DF_UP		241	-0.38638	-1.63958	0	0.0264711	1	1947	tags=24%, list=14%, signal=27%
1166	TOOKER_GEMCITABINE_RESISTANCE_UP	TOOKER_GEMCITABINE_RESISTANCE_UP		67	-0.460875	-1.63946	0.00393701	0.0264909	1	1424	tags=18%, list=10%, signal=20%
1167	LINDGREN_BLADDER_CANCER_HIGH_RECURRENCE	LINDGREN_BLADDER_CANCER_HIGH_RECURRENCE		37	-0.530189	-1.63929	0.006	0.0265219	1	1049	tags=22%, list=7%, signal=23%
1168	REACTOME_SCF_BETA_TRCP_MEDIATED_DEGRADATION_OF_EMI1	REACTOME_SCF_BETA_TRCP_MEDIATED_DEGRADATION_OF_EMI1		46	-0.50944	-1.63906	0.00389105	0.0265724	1	2108	tags=28%, list=15%, signal=33%
1169	AMIT_EGF_RESPONSE_120_HELA	AMIT_EGF_RESPONSE_120_HELA		57	-0.48175	-1.63883	0.00584795	0.0266184	1	1384	tags=30%, list=10%, signal=33%
1170	SMIRNOV_RESPONSE_TO_IR_2HR_UP	SMIRNOV_RESPONSE_TO_IR_2HR_UP		42	-0.517178	-1.63814	0.00801603	0.0267759	1	1300	tags=43%, list=9%, signal=47%
1171	CHIBA_RESPONSE_TO_TSA_DN	CHIBA_RESPONSE_TO_TSA_DN		21	-0.590187	-1.63763	0.0211416	0.0268758	1	1160	tags=24%, list=8%, signal=26%
1172	BLUM_RESPONSE_TO_SALIRASIB_UP	BLUM_RESPONSE_TO_SALIRASIB_UP		223	-0.39429	-1.63767	0	0.0268793	1	1365	tags=18%, list=10%, signal=20%
1173	GO_HETEROTYPIC_CELL_CELL_ADHESION	GO_HETEROTYPIC_CELL_CELL_ADHESION		22	-0.573522	-1.63668	0.0169492	0.0270955	1	2881	tags=45%, list=20%, signal=57%
1174	GO_CYTOPLASMIC_MRNA_PROCESSING_BODY	GO_CYTOPLASMIC_MRNA_PROCESSING_BODY		55	-0.480688	-1.63644	0.00189036	0.0271293	1	1900	tags=29%, list=13%, signal=33%
1175	CHOW_RASSF1_TARGETS_DN	CHOW_RASSF1_TARGETS_DN		23	-0.581059	-1.63622	0.0153173	0.0271767	1	1339	tags=26%, list=9%, signal=29%
1176	GO_REGULATION_OF_ANTIGEN_RECEPTOR_MEDIATED_SIGNALING_PATHWAY	GO_REGULATION_OF_ANTIGEN_RECEPTOR_MEDIATED_SIGNALING_PATHWAY		33	-0.537242	-1.6357	0.0163934	0.0272551	1	1127	tags=24%, list=8%, signal=26%
1177	HELLER_HDAC_TARGETS_UP	HELLER_HDAC_TARGETS_UP		240	-0.390136	-1.63574	0.0017452	0.02726	1	1387	tags=17%, list=10%, signal=19%
1178	GO_REGULATION_OF_PROTEIN_LOCALIZATION_TO_NUCLEUS	GO_REGULATION_OF_PROTEIN_LOCALIZATION_TO_NUCLEUS		174	-0.407383	-1.63575	0	0.0272713	1	1566	tags=24%, list=11%, signal=27%
1179	GO_NEGATIVE_REGULATION_OF_LYMPHOCYTE_APOPTOTIC_PROCESS	GO_NEGATIVE_REGULATION_OF_LYMPHOCYTE_APOPTOTIC_PROCESS		19	-0.60944	-1.63557	0.0180361	0.0272774	1	1550	tags=26%, list=11%, signal=30%
1180	GAVIN_FOXP3_TARGETS_CLUSTER_T7	GAVIN_FOXP3_TARGETS_CLUSTER_T7		83	-0.447646	-1.63537	0.00192678	0.0272829	1	1190	tags=17%, list=8%, signal=18%
1181	GO_POSITIVE_REGULATION_OF_CELLULAR_PROTEIN_LOCALIZATION	GO_POSITIVE_REGULATION_OF_CELLULAR_PROTEIN_LOCALIZATION		267	-0.385464	-1.63502	0	0.0273608	1	1707	tags=20%, list=12%, signal=23%
1182	IRF1_Q6	IRF1_Q6		167	-0.404766	-1.63378	0.00181488	0.0276384	1	1307	tags=20%, list=9%, signal=22%
1183	LU_EZH2_TARGETS_UP	LU_EZH2_TARGETS_UP		191	-0.397406	-1.63361	0	0.0276409	1	1466	tags=15%, list=10%, signal=17%
1184	LABBE_TGFB1_TARGETS_UP	LABBE_TGFB1_TARGETS_UP		64	-0.467281	-1.63221	0.00384615	0.0279252	1	2982	tags=44%, list=21%, signal=55%
1185	CYCLIN_D1_KE_.V1_DN	CYCLIN_D1_KE_.V1_DN		123	-0.421421	-1.63192	0.00735294	0.0279695	1	1097	tags=17%, list=8%, signal=18%
1186	PID_GMCSF_PATHWAY	PID_GMCSF_PATHWAY		36	-0.524555	-1.63178	0.00186567	0.0279924	1	1050	tags=33%, list=7%, signal=36%
1187	SARTIPY_BLUNTED_BY_INSULIN_RESISTANCE_UP	SARTIPY_BLUNTED_BY_INSULIN_RESISTANCE_UP		17	-0.630875	-1.63167	0.0185185	0.0280093	1	687	tags=35%, list=5%, signal=37%
1188	REACTOME_DEGRADATION_OF_THE_EXTRACELLULAR_MATRIX	REACTOME_DEGRADATION_OF_THE_EXTRACELLULAR_MATRIX		18	-0.624154	-1.63148	0.0190678	0.0280519	1	2801	tags=44%, list=20%, signal=55%
1189	RICKMAN_METASTASIS_DN	RICKMAN_METASTASIS_DN		192	-0.397883	-1.63098	0	0.0281519	1	1298	tags=20%, list=9%, signal=22%
1190	GO_RESPONSE_TO_ALKALOID	GO_RESPONSE_TO_ALKALOID		90	-0.445223	-1.63081	0.00359712	0.0281548	1	1198	tags=23%, list=8%, signal=25%
1191	REACTOME_P53_DEPENDENT_G1_DNA_DAMAGE_RESPONSE	REACTOME_P53_DEPENDENT_G1_DNA_DAMAGE_RESPONSE		51	-0.494371	-1.63082	0.00718133	0.0281644	1	2108	tags=27%, list=15%, signal=32%
1192	PID_SHP2_PATHWAY	PID_SHP2_PATHWAY		46	-0.501554	-1.63071	0.0093633	0.0281733	1	2726	tags=43%, list=19%, signal=54%
1193	TONKS_TARGETS_OF_RUNX1_RUNX1T1_FUSION_SUSTAINDED_IN_ERYTHROCYTE_UP	TONKS_TARGETS_OF_RUNX1_RUNX1T1_FUSION_SUSTAINDED_IN_ERYTHROCYTE_UP		38	-0.527537	-1.62993	0.00572519	0.0283427	1	2820	tags=55%, list=20%, signal=69%
1194	GO_VIRUS_RECEPTOR_ACTIVITY	GO_VIRUS_RECEPTOR_ACTIVITY		55	-0.476408	-1.62929	0.00591716	0.0284786	1	433	tags=13%, list=3%, signal=13%
1195	PID_CXCR3_PATHWAY	PID_CXCR3_PATHWAY		34	-0.524443	-1.62861	0.014	0.0286069	1	1418	tags=24%, list=10%, signal=26%
1196	GO_NEGATIVE_REGULATION_OF_NUCLEOCYTOPLASMIC_TRANSPORT	GO_NEGATIVE_REGULATION_OF_NUCLEOCYTOPLASMIC_TRANSPORT		59	-0.483063	-1.62868	0.00798403	0.0286198	1	2077	tags=37%, list=15%, signal=43%
1197	GO_REGULATION_OF_CYCLIC_NUCLEOTIDE_METABOLIC_PROCESS	GO_REGULATION_OF_CYCLIC_NUCLEOTIDE_METABOLIC_PROCESS		70	-0.45997	-1.62772	0.00570342	0.0287389	1	1391	tags=23%, list=10%, signal=25%
1198	ZHAN_V2_LATE_DIFFERENTIATION_GENES	ZHAN_V2_LATE_DIFFERENTIATION_GENES		42	-0.518613	-1.62783	0.00582524	0.0287452	1	2869	tags=33%, list=20%, signal=42%
1199	BOQUEST_STEM_CELL_UP	BOQUEST_STEM_CELL_UP		166	-0.403874	-1.62739	0	0.0287892	1	2398	tags=26%, list=17%, signal=31%
1200	KIM_ALL_DISORDERS_CALB1_CORR_DN	KIM_ALL_DISORDERS_CALB1_CORR_DN		19	-0.603528	-1.62702	0.014862	0.0288619	1	770	tags=26%, list=5%, signal=28%
1201	YTATTTTNR_MEF2_02	YTATTTTNR_MEF2_02		205	-0.392865	-1.62689	0	0.0288824	1	1535	tags=20%, list=11%, signal=22%
1202	RAY_TUMORIGENESIS_BY_ERBB2_CDC25A_DN	RAY_TUMORIGENESIS_BY_ERBB2_CDC25A_DN		114	-0.426833	-1.6266	0	0.0289399	1	637	tags=14%, list=4%, signal=15%
1203	GO_HOMEOSTASIS_OF_NUMBER_OF_CELLS	GO_HOMEOSTASIS_OF_NUMBER_OF_CELLS		124	-0.418907	-1.62615	0	0.0290331	1	1786	tags=23%, list=13%, signal=27%
1204	BRUECKNER_TARGETS_OF_MIRLET7A3_UP	BRUECKNER_TARGETS_OF_MIRLET7A3_UP		78	-0.450835	-1.626	0.00191571	0.0290541	1	1761	tags=32%, list=12%, signal=36%
1205	GO_PROTEIN_TYROSINE_KINASE_ACTIVITY	GO_PROTEIN_TYROSINE_KINASE_ACTIVITY		113	-0.423688	-1.62568	0.00178891	0.0291365	1	1418	tags=22%, list=10%, signal=24%
1206	GO_FEMALE_GAMETE_GENERATION	GO_FEMALE_GAMETE_GENERATION		51	-0.48413	-1.6252	0.0131086	0.0292217	1	1058	tags=22%, list=7%, signal=23%
1207	BIOCARTA_IL2_PATHWAY	BIOCARTA_IL2_PATHWAY		21	-0.588832	-1.62437	0.0168067	0.0294008	1	1182	tags=38%, list=8%, signal=41%
1208	LANDIS_BREAST_CANCER_PROGRESSION_UP	LANDIS_BREAST_CANCER_PROGRESSION_UP		35	-0.527768	-1.62419	0.00833333	0.0294293	1	1751	tags=34%, list=12%, signal=39%
1209	HALLMARK_APICAL_JUNCTION	HALLMARK_APICAL_JUNCTION		138	-0.412251	-1.62401	0	0.0294579	1	1702	tags=20%, list=12%, signal=22%
1210	CHR6P21	CHR6P21		205	-0.390799	-1.62243	0	0.0298335	1	1500	tags=19%, list=11%, signal=21%
1211	CSR_LATE_UP.V1_DN	CSR_LATE_UP.V1_DN		109	-0.430195	-1.62208	0.00185185	0.029887	1	2063	tags=25%, list=15%, signal=29%
1212	GO_T_CELL_RECEPTOR_SIGNALING_PATHWAY	GO_T_CELL_RECEPTOR_SIGNALING_PATHWAY		120	-0.423529	-1.622	0.00377358	0.0298948	1	2777	tags=34%, list=20%, signal=42%
1213	GO_CELL_DEATH_IN_RESPONSE_TO_OXIDATIVE_STRESS	GO_CELL_DEATH_IN_RESPONSE_TO_OXIDATIVE_STRESS		16	-0.635227	-1.62171	0.0194384	0.0299549	1	1092	tags=38%, list=8%, signal=41%
1214	DAZARD_UV_RESPONSE_CLUSTER_G4	DAZARD_UV_RESPONSE_CLUSTER_G4		16	-0.630684	-1.62173	0.0177778	0.0299639	1	2193	tags=38%, list=15%, signal=44%
1215	GO_REGULATION_OF_GROWTH	GO_REGULATION_OF_GROWTH		424	-0.363034	-1.62111	0	0.0300481	1	2186	tags=25%, list=15%, signal=28%
1216	GO_NAD_ADP_RIBOSYLTRANSFERASE_ACTIVITY	GO_NAD_ADP_RIBOSYLTRANSFERASE_ACTIVITY		24	-0.56316	-1.62064	0.0310559	0.0301497	1	2013	tags=42%, list=14%, signal=48%
1217	GO_NEGATIVE_REGULATION_OF_HOMEOSTATIC_PROCESS	GO_NEGATIVE_REGULATION_OF_HOMEOSTATIC_PROCESS		97	-0.436288	-1.6204	0.00548446	0.0301944	1	1152	tags=18%, list=8%, signal=19%
1218	GO_REGULATION_OF_EPITHELIAL_CELL_MIGRATION	GO_REGULATION_OF_EPITHELIAL_CELL_MIGRATION		118	-0.419211	-1.62029	0.00371058	0.0302127	1	1563	tags=22%, list=11%, signal=25%
1219	CHR4Q31	CHR4Q31		43	-0.494148	-1.61921	0.016129	0.030495	1	2120	tags=26%, list=15%, signal=30%
1220	WU_SILENCED_BY_METHYLATION_IN_BLADDER_CANCER	WU_SILENCED_BY_METHYLATION_IN_BLADDER_CANCER		43	-0.503903	-1.61907	0.0179641	0.0305138	1	2053	tags=28%, list=14%, signal=33%
1221	GO_SECONDARY_METABOLIC_PROCESS	GO_SECONDARY_METABOLIC_PROCESS		24	-0.57254	-1.61885	0.0148936	0.0305635	1	1505	tags=21%, list=11%, signal=23%
1222	GOLDRATH_NAIVE_VS_MEMORY_CD8_TCELL_UP	GOLDRATH_NAIVE_VS_MEMORY_CD8_TCELL_UP		160	-0.401922	-1.6186	0.00181488	0.0305959	1	1353	tags=18%, list=10%, signal=20%
1223	GO_NEGATIVE_REGULATION_OF_VIRAL_TRANSCRIPTION	GO_NEGATIVE_REGULATION_OF_VIRAL_TRANSCRIPTION		20	-0.594945	-1.61819	0.0215517	0.030692	1	1354	tags=35%, list=10%, signal=39%
1224	GO_CELLULAR_RESPONSE_TO_ACID_CHEMICAL	GO_CELLULAR_RESPONSE_TO_ACID_CHEMICAL		113	-0.423723	-1.61793	0.00753296	0.030759	1	2343	tags=31%, list=17%, signal=37%
1225	MCBRYAN_PUBERTAL_BREAST_4_5WK_UP	MCBRYAN_PUBERTAL_BREAST_4_5WK_UP		177	-0.397206	-1.61787	0	0.0307598	1	2152	tags=23%, list=15%, signal=27%
1226	GALLUZZI_PREVENT_MITOCHONDIAL_PERMEABILIZATION	GALLUZZI_PREVENT_MITOCHONDIAL_PERMEABILIZATION		19	-0.587409	-1.61689	0.0284464	0.0310027	1	1198	tags=26%, list=8%, signal=29%
1227	GO_NEGATIVE_REGULATION_OF_PROTEIN_MODIFICATION_BY_SMALL_PROTEIN_CONJUGATION_OR_REMOVAL	GO_NEGATIVE_REGULATION_OF_PROTEIN_MODIFICATION_BY_SMALL_PROTEIN_CONJUGATION_OR_REMOVAL		120	-0.421823	-1.61508	0.00382409	0.031384	1	1039	tags=18%, list=7%, signal=19%
1228	GO_POSITIVE_REGULATION_OF_RESPONSE_TO_CYTOKINE_STIMULUS	GO_POSITIVE_REGULATION_OF_RESPONSE_TO_CYTOKINE_STIMULUS		23	-0.582087	-1.6148	0.0188285	0.0314455	1	1450	tags=30%, list=10%, signal=34%
1229	GO_GTPASE_ACTIVITY	GO_GTPASE_ACTIVITY		177	-0.397995	-1.61423	0	0.0315814	1	2710	tags=33%, list=19%, signal=40%
1230	BIOCARTA_PML_PATHWAY	BIOCARTA_PML_PATHWAY		17	-0.614776	-1.61427	0.0214592	0.0315858	1	904	tags=35%, list=6%, signal=38%
1231	KEGG_TYPE_II_DIABETES_MELLITUS	KEGG_TYPE_II_DIABETES_MELLITUS		32	-0.533558	-1.61405	0.012987	0.0315987	1	1062	tags=28%, list=7%, signal=30%
1232	GO_PROTEIN_OLIGOMERIZATION	GO_PROTEIN_OLIGOMERIZATION		286	-0.376726	-1.61407	0	0.0316102	1	1248	tags=14%, list=9%, signal=15%
1233	GO_NEURON_PROJECTION_REGENERATION	GO_NEURON_PROJECTION_REGENERATION		23	-0.578806	-1.61392	0.0319829	0.0316167	1	879	tags=22%, list=6%, signal=23%
1234	GERY_CEBP_TARGETS	GERY_CEBP_TARGETS		99	-0.435411	-1.61393	0.00187266	0.0316263	1	1549	tags=26%, list=11%, signal=29%
1235	GO_NEGATIVE_REGULATION_OF_TRANSPORT	GO_NEGATIVE_REGULATION_OF_TRANSPORT		304	-0.373846	-1.61354	0	0.0316588	1	1446	tags=18%, list=10%, signal=19%
1236	BOYLAN_MULTIPLE_MYELOMA_C_D_DN	BOYLAN_MULTIPLE_MYELOMA_C_D_DN		177	-0.395532	-1.61361	0.00183486	0.031671	1	1447	tags=21%, list=10%, signal=24%
1237	FONTAINE_PAPILLARY_THYROID_CARCINOMA_DN	FONTAINE_PAPILLARY_THYROID_CARCINOMA_DN		45	-0.501713	-1.61354	0.0134875	0.0316714	1	1248	tags=20%, list=9%, signal=22%
1238	RICKMAN_TUMOR_DIFFERENTIATED_WELL_VS_MODERATELY_DN	RICKMAN_TUMOR_DIFFERENTIATED_WELL_VS_MODERATELY_DN		65	-0.465728	-1.61316	0.00961539	0.0317338	1	2087	tags=31%, list=15%, signal=36%
1239	CHR17Q12	CHR17Q12		31	-0.535713	-1.6131	0.018595	0.0317394	1	588	tags=23%, list=4%, signal=24%
1240	GO_POSITIVE_REGULATION_OF_PROTEOLYSIS	GO_POSITIVE_REGULATION_OF_PROTEOLYSIS		283	-0.378304	-1.61284	0	0.0317851	1	1128	tags=16%, list=8%, signal=17%
1241	GO_ACUTE_INFLAMMATORY_RESPONSE	GO_ACUTE_INFLAMMATORY_RESPONSE		44	-0.499487	-1.61256	0.0165631	0.0318549	1	833	tags=20%, list=6%, signal=22%
1242	STREICHER_LSM1_TARGETS_DN	STREICHER_LSM1_TARGETS_DN		15	-0.654214	-1.61233	0.0232558	0.0318894	1	1208	tags=33%, list=9%, signal=36%
1243	CHR7Q31	CHR7Q31		46	-0.493548	-1.61234	0.0125	0.0318998	1	1636	tags=26%, list=12%, signal=29%
1244	GO_MAMMARY_GLAND_EPITHELIUM_DEVELOPMENT	GO_MAMMARY_GLAND_EPITHELIUM_DEVELOPMENT		33	-0.532833	-1.61207	0.0147992	0.0319219	1	1228	tags=24%, list=9%, signal=26%
1245	MANTOVANI_NFKB_TARGETS_UP	MANTOVANI_NFKB_TARGETS_UP		26	-0.563338	-1.61216	0.0201207	0.0319248	1	1078	tags=35%, list=8%, signal=37%
1246	GO_CYTOKINE_SECRETION	GO_CYTOKINE_SECRETION		26	-0.565504	-1.61207	0.012685	0.0319357	1	1550	tags=31%, list=11%, signal=34%
1247	GO_REGULATION_OF_VASOCONSTRICTION	GO_REGULATION_OF_VASOCONSTRICTION		32	-0.530617	-1.61159	0.016129	0.0320238	1	2087	tags=38%, list=15%, signal=44%
1248	GO_MODULATION_BY_SYMBIONT_OF_HOST_CELLULAR_PROCESS	GO_MODULATION_BY_SYMBIONT_OF_HOST_CELLULAR_PROCESS		25	-0.570271	-1.61092	0.0186335	0.0321963	1	2830	tags=44%, list=20%, signal=55%
1249	GO_INTRINSIC_APOPTOTIC_SIGNALING_PATHWAY	GO_INTRINSIC_APOPTOTIC_SIGNALING_PATHWAY		118	-0.417207	-1.61066	0.00379507	0.0322241	1	1514	tags=24%, list=11%, signal=26%
1250	GO_SKIN_EPIDERMIS_DEVELOPMENT	GO_SKIN_EPIDERMIS_DEVELOPMENT		36	-0.516628	-1.61072	0.00965251	0.0322246	1	1833	tags=33%, list=13%, signal=38%
1251	GO_REGULATION_OF_MEMBRANE_PROTEIN_ECTODOMAIN_PROTEOLYSIS	GO_REGULATION_OF_MEMBRANE_PROTEIN_ECTODOMAIN_PROTEOLYSIS		16	-0.632073	-1.61054	0.0231579	0.0322517	1	1069	tags=25%, list=8%, signal=27%
1252	GO_REGULATION_OF_MITOCHONDRIAL_MEMBRANE_POTENTIAL	GO_REGULATION_OF_MITOCHONDRIAL_MEMBRANE_POTENTIAL		40	-0.509601	-1.61042	0.0123203	0.0322559	1	1305	tags=25%, list=9%, signal=27%
1253	GO_REGULATION_OF_FILOPODIUM_ASSEMBLY	GO_REGULATION_OF_FILOPODIUM_ASSEMBLY		28	-0.555769	-1.6096	0.0184049	0.0324074	1	1503	tags=32%, list=11%, signal=36%
1254	MULLIGHAN_MLL_SIGNATURE_2_DN	MULLIGHAN_MLL_SIGNATURE_2_DN		209	-0.390968	-1.60939	0.00175747	0.0324278	1	1446	tags=20%, list=10%, signal=22%
1255	RAGHAVACHARI_PLATELET_SPECIFIC_GENES	RAGHAVACHARI_PLATELET_SPECIFIC_GENES		57	-0.465755	-1.60919	0.00776699	0.0324563	1	1262	tags=16%, list=9%, signal=17%
1256	GO_RESPONSE_TO_INTERLEUKIN_6	GO_RESPONSE_TO_INTERLEUKIN_6		21	-0.587713	-1.60771	0.0230126	0.0328239	1	2471	tags=48%, list=17%, signal=58%
1257	REACTOME_SEMA4D_INDUCED_CELL_MIGRATION_AND_GROWTH_CONE_COLLAPSE	REACTOME_SEMA4D_INDUCED_CELL_MIGRATION_AND_GROWTH_CONE_COLLAPSE		19	-0.618341	-1.60735	0.0167015	0.0328918	1	849	tags=26%, list=6%, signal=28%
1258	CHR8Q21	CHR8Q21		33	-0.53584	-1.60724	0.0123711	0.0329153	1	1887	tags=30%, list=13%, signal=35%
1259	GO_POSITIVE_REGULATION_OF_TISSUE_REMODELING	GO_POSITIVE_REGULATION_OF_TISSUE_REMODELING		21	-0.585601	-1.60701	0.0223214	0.0329666	1	1104	tags=29%, list=8%, signal=31%
1260	ZHAN_MULTIPLE_MYELOMA_CD1_VS_CD2_UP	ZHAN_MULTIPLE_MYELOMA_CD1_VS_CD2_UP		48	-0.484533	-1.60668	0.00814664	0.0330421	1	1253	tags=27%, list=9%, signal=30%
1261	SMIRNOV_CIRCULATING_ENDOTHELIOCYTES_IN_CANCER_UP	SMIRNOV_CIRCULATING_ENDOTHELIOCYTES_IN_CANCER_UP		136	-0.406026	-1.60626	0.00189394	0.0330955	1	1606	tags=23%, list=11%, signal=25%
1262	ENK_UV_RESPONSE_EPIDERMIS_DN	ENK_UV_RESPONSE_EPIDERMIS_DN		404	-0.363331	-1.60607	0	0.0331333	1	1624	tags=22%, list=11%, signal=24%
1263	VERRECCHIA_RESPONSE_TO_TGFB1_C2	VERRECCHIA_RESPONSE_TO_TGFB1_C2		22	-0.581076	-1.604	0.0266393	0.0337172	1	1840	tags=27%, list=13%, signal=31%
1264	GO_RESPONSE_TO_ZINC_ION	GO_RESPONSE_TO_ZINC_ION		39	-0.500351	-1.60386	0.016129	0.0337408	1	1146	tags=28%, list=8%, signal=31%
1265	KRAS.DF.V1_DN	KRAS.DF.V1_DN		112	-0.42259	-1.60376	0.00934579	0.033757	1	2008	tags=29%, list=14%, signal=34%
1266	REACTOME_COSTIMULATION_BY_THE_CD28_FAMILY	REACTOME_COSTIMULATION_BY_THE_CD28_FAMILY		50	-0.48648	-1.60364	0.0148148	0.0337806	1	1189	tags=20%, list=8%, signal=22%
1267	MULLIGHAN_NPM1_SIGNATURE_3_DN	MULLIGHAN_NPM1_SIGNATURE_3_DN		113	-0.417508	-1.6032	0.00366972	0.0338829	1	2267	tags=27%, list=16%, signal=31%
1268	PID_SYNDECAN_2_PATHWAY	PID_SYNDECAN_2_PATHWAY		28	-0.541553	-1.60296	0.0164271	0.0339483	1	1051	tags=21%, list=7%, signal=23%
1269	GO_REGULATION_OF_MAST_CELL_ACTIVATION	GO_REGULATION_OF_MAST_CELL_ACTIVATION		30	-0.524653	-1.60206	0.0251572	0.0341536	1	1514	tags=27%, list=11%, signal=30%
1270	GOLUB_ALL_VS_AML_UP	GOLUB_ALL_VS_AML_UP		24	-0.561934	-1.602	0.03125	0.0341614	1	832	tags=21%, list=6%, signal=22%
1271	GO_ER_NUCLEUS_SIGNALING_PATHWAY	GO_ER_NUCLEUS_SIGNALING_PATHWAY		30	-0.540208	-1.60213	0.017341	0.034162	1	2227	tags=37%, list=16%, signal=43%
1272	PID_CMYB_PATHWAY	PID_CMYB_PATHWAY		66	-0.462778	-1.60207	0.014	0.0341658	1	1515	tags=27%, list=11%, signal=30%
1273	BIOCARTA_CASPASE_PATHWAY	BIOCARTA_CASPASE_PATHWAY		22	-0.589429	-1.60176	0.0190476	0.0342051	1	1098	tags=41%, list=8%, signal=44%
1274	BIOCARTA_GSK3_PATHWAY	BIOCARTA_GSK3_PATHWAY		25	-0.560933	-1.60179	0.0175781	0.0342116	1	2158	tags=36%, list=15%, signal=42%
1275	GO_POSITIVE_REGULATION_OF_CYTOPLASMIC_TRANSPORT	GO_POSITIVE_REGULATION_OF_CYTOPLASMIC_TRANSPORT		202	-0.384827	-1.60106	0	0.0343398	1	1693	tags=19%, list=12%, signal=22%
1276	ATM_DN.V1_DN	ATM_DN.V1_DN		75	-0.444874	-1.60107	0.00572519	0.0343491	1	945	tags=17%, list=7%, signal=18%
1277	REACTOME_IMMUNOREGULATORY_INTERACTIONS_BETWEEN_A_LYMPHOID_AND_A_NON_LYMPHOID_CELL	REACTOME_IMMUNOREGULATORY_INTERACTIONS_BETWEEN_A_LYMPHOID_AND_A_NON_LYMPHOID_CELL		44	-0.504061	-1.60111	0.016	0.0343895	1	2546	tags=41%, list=18%, signal=50%
1278	ZHENG_BOUND_BY_FOXP3	ZHENG_BOUND_BY_FOXP3		371	-0.364905	-1.60026	0	0.0345429	1	1103	tags=17%, list=8%, signal=18%
1279	GO_IMMUNE_SYSTEM_DEVELOPMENT	GO_IMMUNE_SYSTEM_DEVELOPMENT		412	-0.360789	-1.60028	0	0.0345507	1	1890	tags=24%, list=13%, signal=27%
1280	WANG_CISPLATIN_RESPONSE_AND_XPC_DN	WANG_CISPLATIN_RESPONSE_AND_XPC_DN		179	-0.392309	-1.59995	0.00364299	0.0346128	1	1467	tags=21%, list=10%, signal=23%
1281	REACTOME_ADAPTIVE_IMMUNE_SYSTEM	REACTOME_ADAPTIVE_IMMUNE_SYSTEM		418	-0.359862	-1.59981	0	0.0346397	1	2808	tags=29%, list=20%, signal=35%
1282	CHR6Q25	CHR6Q25		31	-0.539234	-1.59939	0.020284	0.0347256	1	563	tags=19%, list=4%, signal=20%
1283	GO_REGULATION_OF_SMOOTH_MUSCLE_CELL_PROLIFERATION	GO_REGULATION_OF_SMOOTH_MUSCLE_CELL_PROLIFERATION		71	-0.452465	-1.5988	0.00392157	0.0348858	1	1559	tags=30%, list=11%, signal=33%
1284	TAVOR_CEBPA_TARGETS_DN	TAVOR_CEBPA_TARGETS_DN		25	-0.548932	-1.59884	0.0159363	0.0348874	1	102	tags=16%, list=1%, signal=16%
1285	TAKEDA_TARGETS_OF_NUP98_HOXA9_FUSION_6HR_DN	TAKEDA_TARGETS_OF_NUP98_HOXA9_FUSION_6HR_DN		33	-0.523453	-1.59859	0.0198413	0.0349132	1	725	tags=27%, list=5%, signal=29%
1286	GO_NEGATIVE_REGULATION_OF_ADHERENS_JUNCTION_ORGANIZATION	GO_NEGATIVE_REGULATION_OF_ADHERENS_JUNCTION_ORGANIZATION		15	-0.640542	-1.59768	0.0260304	0.0351797	1	2430	tags=53%, list=17%, signal=64%
1287	GO_RIBONUCLEOPROTEIN_GRANULE	GO_RIBONUCLEOPROTEIN_GRANULE		108	-0.419615	-1.59755	0.00720721	0.035212	1	1900	tags=23%, list=13%, signal=27%
1288	GO_MESENCHYME_MORPHOGENESIS	GO_MESENCHYME_MORPHOGENESIS		24	-0.568742	-1.59707	0.00809717	0.0353268	1	3129	tags=50%, list=22%, signal=64%
1289	BOSCO_EPITHELIAL_DIFFERENTIATION_MODULE	BOSCO_EPITHELIAL_DIFFERENTIATION_MODULE		25	-0.542078	-1.5971	0.0180587	0.0353338	1	833	tags=16%, list=6%, signal=17%
1290	GO_POSITIVE_REGULATION_OF_TRANSFERASE_ACTIVITY	GO_POSITIVE_REGULATION_OF_TRANSFERASE_ACTIVITY		457	-0.355589	-1.59675	0	0.0353986	1	1566	tags=18%, list=11%, signal=20%
1291	KEGG_ANTIGEN_PROCESSING_AND_PRESENTATION	KEGG_ANTIGEN_PROCESSING_AND_PRESENTATION		58	-0.476515	-1.59675	0.0143443	0.0354135	1	2546	tags=33%, list=18%, signal=40%
1292	DACOSTA_ERCC3_ALLELE_XPCS_VS_TTD_UP	DACOSTA_ERCC3_ALLELE_XPCS_VS_TTD_UP		18	-0.590773	-1.59665	0.0156951	0.03542	1	834	tags=17%, list=6%, signal=18%
1293	GO_MAMMARY_GLAND_DUCT_MORPHOGENESIS	GO_MAMMARY_GLAND_DUCT_MORPHOGENESIS		16	-0.615632	-1.59627	0.0192719	0.0354958	1	166	tags=19%, list=1%, signal=19%
1294	TAKEDA_TARGETS_OF_NUP98_HOXA9_FUSION_6HR_UP	TAKEDA_TARGETS_OF_NUP98_HOXA9_FUSION_6HR_UP		55	-0.476978	-1.5963	0.00773694	0.0355023	1	917	tags=27%, list=6%, signal=29%
1295	TTCNRGNNNNTTC_HSF_Q6	TTCNRGNNNNTTC_HSF_Q6		289	-0.372153	-1.59596	0	0.0355713	1	1564	tags=20%, list=11%, signal=22%
1296	GO_NEGATIVE_REGULATION_OF_CELL_GROWTH	GO_NEGATIVE_REGULATION_OF_CELL_GROWTH		115	-0.408809	-1.59564	0	0.0356282	1	2543	tags=30%, list=18%, signal=37%
1297	MOOTHA_FFA_OXYDATION	MOOTHA_FFA_OXYDATION		18	-0.609158	-1.59567	0.0153509	0.0356358	1	287	tags=11%, list=2%, signal=11%
1298	VERRECCHIA_EARLY_RESPONSE_TO_TGFB1	VERRECCHIA_EARLY_RESPONSE_TO_TGFB1		46	-0.493421	-1.59571	0.014433	0.0356372	1	1248	tags=22%, list=9%, signal=24%
1299	BIOCARTA_STRESS_PATHWAY	BIOCARTA_STRESS_PATHWAY		22	-0.57464	-1.59399	0.0254777	0.0361167	1	1418	tags=41%, list=10%, signal=45%
1300	OUELLET_CULTURED_OVARIAN_CANCER_INVASIVE_VS_LMP_DN	OUELLET_CULTURED_OVARIAN_CANCER_INVASIVE_VS_LMP_DN		15	-0.623447	-1.59387	0.02407	0.036145	1	457	tags=20%, list=3%, signal=21%
1301	GO_TRANSLATION_ELONGATION_FACTOR_ACTIVITY	GO_TRANSLATION_ELONGATION_FACTOR_ACTIVITY		16	-0.616308	-1.59373	0.0273684	0.0361615	1	1386	tags=19%, list=10%, signal=21%
1302	KRAS.BREAST_UP.V1_UP	KRAS.BREAST_UP.V1_UP		69	-0.456502	-1.59316	0.0115163	0.0363219	1	1994	tags=28%, list=14%, signal=32%
1303	FOSTER_KDM1A_TARGETS_UP	FOSTER_KDM1A_TARGETS_UP		137	-0.409318	-1.5932	0.0018622	0.0363275	1	2160	tags=28%, list=15%, signal=33%
1304	KAAB_FAILED_HEART_VENTRICLE_DN	KAAB_FAILED_HEART_VENTRICLE_DN		34	-0.522712	-1.59309	0.0215264	0.0363314	1	1332	tags=26%, list=9%, signal=29%
1305	ENK_UV_RESPONSE_EPIDERMIS_UP	ENK_UV_RESPONSE_EPIDERMIS_UP		234	-0.374311	-1.59296	0	0.0363595	1	1278	tags=15%, list=9%, signal=17%
1306	MARZEC_IL2_SIGNALING_DN	MARZEC_IL2_SIGNALING_DN		30	-0.52336	-1.59283	0.0163599	0.0363718	1	1755	tags=33%, list=12%, signal=38%
1307	GO_DIGESTIVE_SYSTEM_DEVELOPMENT	GO_DIGESTIVE_SYSTEM_DEVELOPMENT		86	-0.436672	-1.59285	0.00369004	0.0363797	1	2200	tags=29%, list=16%, signal=34%
1308	VECCHI_GASTRIC_CANCER_ADVANCED_VS_EARLY_UP	VECCHI_GASTRIC_CANCER_ADVANCED_VS_EARLY_UP		110	-0.417212	-1.59266	0.00736648	0.036397	1	2201	tags=32%, list=16%, signal=37%
1309	PID_CD8_TCR_PATHWAY	PID_CD8_TCR_PATHWAY		45	-0.487853	-1.59224	0.0102881	0.0365007	1	2777	tags=42%, list=20%, signal=52%
1310	GO_RESPONSE_TO_FATTY_ACID	GO_RESPONSE_TO_FATTY_ACID		60	-0.456257	-1.59217	0.00393701	0.036509	1	1344	tags=22%, list=9%, signal=24%
1311	GO_REGULATION_OF_JNK_CASCADE	GO_REGULATION_OF_JNK_CASCADE		115	-0.415919	-1.59142	0.0018622	0.0366801	1	1176	tags=21%, list=8%, signal=23%
1312	PID_KIT_PATHWAY	PID_KIT_PATHWAY		45	-0.480683	-1.59096	0.00598802	0.0367887	1	1094	tags=22%, list=8%, signal=24%
1313	GO_NEGATIVE_REGULATION_OF_CYTOPLASMIC_TRANSPORT	GO_NEGATIVE_REGULATION_OF_CYTOPLASMIC_TRANSPORT		90	-0.432964	-1.59089	0.00380228	0.0368009	1	2077	tags=30%, list=15%, signal=35%
1314	GO_POSITIVE_REGULATION_OF_INTERLEUKIN_10_PRODUCTION	GO_POSITIVE_REGULATION_OF_INTERLEUKIN_10_PRODUCTION		19	-0.609627	-1.59025	0.0298211	0.0369823	1	1104	tags=37%, list=8%, signal=40%
1315	GO_NEGATIVE_REGULATION_OF_FAT_CELL_DIFFERENTIATION	GO_NEGATIVE_REGULATION_OF_FAT_CELL_DIFFERENTIATION		26	-0.546493	-1.59029	0.0165289	0.0369838	1	1889	tags=27%, list=13%, signal=31%
1316	GO_RESPONSE_TO_RETINOIC_ACID	GO_RESPONSE_TO_RETINOIC_ACID		62	-0.462115	-1.58975	0.00199203	0.0370863	1	1358	tags=21%, list=10%, signal=23%
1317	REACTOME_SIGNALING_BY_GPCR	REACTOME_SIGNALING_BY_GPCR		309	-0.368966	-1.58905	0	0.0372602	1	1833	tags=20%, list=13%, signal=23%
1318	GO_NEGATIVE_REGULATION_OF_TOLL_LIKE_RECEPTOR_SIGNALING_PATHWAY	GO_NEGATIVE_REGULATION_OF_TOLL_LIKE_RECEPTOR_SIGNALING_PATHWAY		18	-0.607363	-1.58876	0.045738	0.0373416	1	1620	tags=44%, list=11%, signal=50%
1319	RAPA_EARLY_UP.V1_UP	RAPA_EARLY_UP.V1_UP		109	-0.423269	-1.58853	0.00582524	0.0373625	1	2169	tags=32%, list=15%, signal=38%
1320	DOANE_BREAST_CANCER_CLASSES_DN	DOANE_BREAST_CANCER_CLASSES_DN		25	-0.551816	-1.58856	0.0183673	0.0373646	1	2901	tags=44%, list=20%, signal=55%
1321	KIM_HYPOXIA	KIM_HYPOXIA		20	-0.588416	-1.58771	0.0248963	0.0375482	1	833	tags=30%, list=6%, signal=32%
1322	GO_INTERACTION_WITH_SYMBIONT	GO_INTERACTION_WITH_SYMBIONT		38	-0.501682	-1.58746	0.0159681	0.0376054	1	154	tags=11%, list=1%, signal=11%
1323	ST_G_ALPHA_S_PATHWAY	ST_G_ALPHA_S_PATHWAY		15	-0.63773	-1.58718	0.0328228	0.0376396	1	2557	tags=40%, list=18%, signal=49%
1324	GO_POSITIVE_REGULATION_OF_PROTEIN_AUTOPHOSPHORYLATION	GO_POSITIVE_REGULATION_OF_PROTEIN_AUTOPHOSPHORYLATION		18	-0.602543	-1.58721	0.0395604	0.0376452	1	1935	tags=44%, list=14%, signal=51%
1325	GO_POSITIVE_REGULATION_OF_JUN_KINASE_ACTIVITY	GO_POSITIVE_REGULATION_OF_JUN_KINASE_ACTIVITY		49	-0.492796	-1.58605	0.00575816	0.0379905	1	1393	tags=29%, list=10%, signal=32%
1326	LAIHO_COLORECTAL_CANCER_SERRATED_UP	LAIHO_COLORECTAL_CANCER_SERRATED_UP		99	-0.423053	-1.58588	0.00191205	0.0380257	1	2184	tags=19%, list=15%, signal=23%
1327	GO_STRESS_ACTIVATED_PROTEIN_KINASE_SIGNALING_CASCADE	GO_STRESS_ACTIVATED_PROTEIN_KINASE_SIGNALING_CASCADE		81	-0.441626	-1.58558	0.00547445	0.0381083	1	1176	tags=22%, list=8%, signal=24%
1328	GO_FORMATION_OF_PRIMARY_GERM_LAYER	GO_FORMATION_OF_PRIMARY_GERM_LAYER		70	-0.451968	-1.5853	0.0094162	0.038163	1	2538	tags=31%, list=18%, signal=38%
1329	DACOSTA_UV_RESPONSE_VIA_ERCC3_COMMON_UP	DACOSTA_UV_RESPONSE_VIA_ERCC3_COMMON_UP		65	-0.455345	-1.58507	0.00590551	0.0382039	1	1583	tags=28%, list=11%, signal=31%
1330	GO_NEGATIVE_REGULATION_OF_TELOMERE_MAINTENANCE	GO_NEGATIVE_REGULATION_OF_TELOMERE_MAINTENANCE		20	-0.571371	-1.58389	0.021978	0.0385322	1	166	tags=15%, list=1%, signal=15%
1331	LEE_EARLY_T_LYMPHOCYTE_DN	LEE_EARLY_T_LYMPHOCYTE_DN		43	-0.496791	-1.58377	0.0235294	0.0385511	1	2350	tags=44%, list=17%, signal=53%
1332	HEIDENBLAD_AMPLICON_8Q24_DN	HEIDENBLAD_AMPLICON_8Q24_DN		36	-0.50344	-1.58362	0.012685	0.0385608	1	2692	tags=39%, list=19%, signal=48%
1333	HOOI_ST7_TARGETS_UP	HOOI_ST7_TARGETS_UP		62	-0.459764	-1.58347	0.0037594	0.0385759	1	2106	tags=29%, list=15%, signal=34%
1334	KANG_CISPLATIN_RESISTANCE_UP	KANG_CISPLATIN_RESISTANCE_UP		15	-0.628668	-1.58341	0.0327198	0.0385804	1	1248	tags=27%, list=9%, signal=29%
1335	REACTOME_DESTABILIZATION_OF_MRNA_BY_TRISTETRAPROLIN_TTP	REACTOME_DESTABILIZATION_OF_MRNA_BY_TRISTETRAPROLIN_TTP		16	-0.615698	-1.5833	0.0280778	0.0386047	1	1565	tags=31%, list=11%, signal=35%
1336	GO_PHOSPHATASE_COMPLEX	GO_PHOSPHATASE_COMPLEX		36	-0.523313	-1.58279	0.00998004	0.0387634	1	2686	tags=42%, list=19%, signal=51%
1337	PID_INTEGRIN_A9B1_PATHWAY	PID_INTEGRIN_A9B1_PATHWAY		21	-0.568198	-1.58267	0.0292887	0.0387696	1	1437	tags=29%, list=10%, signal=32%
1338	GO_REGULATION_OF_MUSCLE_CELL_DIFFERENTIATION	GO_REGULATION_OF_MUSCLE_CELL_DIFFERENTIATION		97	-0.421231	-1.58229	0.00362976	0.0388567	1	1304	tags=25%, list=9%, signal=27%
1339	XU_HGF_SIGNALING_NOT_VIA_AKT1_48HR_UP	XU_HGF_SIGNALING_NOT_VIA_AKT1_48HR_UP		32	-0.527665	-1.58199	0.0197239	0.0389224	1	1514	tags=31%, list=11%, signal=35%
1340	GO_NEGATIVE_REGULATION_OF_LEUKOCYTE_DIFFERENTIATION	GO_NEGATIVE_REGULATION_OF_LEUKOCYTE_DIFFERENTIATION		56	-0.465399	-1.58032	0.0117647	0.0393984	1	1127	tags=25%, list=8%, signal=27%
1341	BOYAULT_LIVER_CANCER_SUBCLASS_G6_DN	BOYAULT_LIVER_CANCER_SUBCLASS_G6_DN		18	-0.576542	-1.58047	0.0405117	0.039399	1	1900	tags=39%, list=13%, signal=45%
1342	GO_REGULATION_OF_MYELOID_CELL_DIFFERENTIATION	GO_REGULATION_OF_MYELOID_CELL_DIFFERENTIATION		127	-0.401167	-1.58036	0.00191205	0.0393991	1	1290	tags=23%, list=9%, signal=25%
1343	GO_CELL_PROLIFERATION	GO_CELL_PROLIFERATION		449	-0.353686	-1.58024	0	0.0394178	1	1396	tags=17%, list=10%, signal=18%
1344	GO_PRODUCTION_OF_MOLECULAR_MEDIATOR_OF_IMMUNE_RESPONSE	GO_PRODUCTION_OF_MOLECULAR_MEDIATOR_OF_IMMUNE_RESPONSE		46	-0.483384	-1.58019	0.00813008	0.0394231	1	536	tags=15%, list=4%, signal=16%
1345	BCAT_BILD_ET_AL_DN	BCAT_BILD_ET_AL_DN		40	-0.499408	-1.57982	0.016129	0.0394715	1	801	tags=23%, list=6%, signal=24%
1346	GO_MOVEMENT_IN_ENVIRONMENT_OF_OTHER_ORGANISM_INVOLVED_IN_SYMBIOTIC_INTERACTION	GO_MOVEMENT_IN_ENVIRONMENT_OF_OTHER_ORGANISM_INVOLVED_IN_SYMBIOTIC_INTERACTION		73	-0.448303	-1.57934	0.0128676	0.0396202	1	521	tags=12%, list=4%, signal=13%
1347	AGCATTA_MIR155	AGCATTA_MIR155		107	-0.416342	-1.57878	0.00535714	0.0397802	1	1122	tags=21%, list=8%, signal=22%
1348	GO_POSITIVE_REGULATION_OF_MRNA_METABOLIC_PROCESS	GO_POSITIVE_REGULATION_OF_MRNA_METABOLIC_PROCESS		37	-0.507945	-1.5786	0.0252427	0.0397986	1	1127	tags=19%, list=8%, signal=20%
1349	GO_REGULATION_OF_RELEASE_OF_SEQUESTERED_CALCIUM_ION_INTO_CYTOSOL	GO_REGULATION_OF_RELEASE_OF_SEQUESTERED_CALCIUM_ION_INTO_CYTOSOL		44	-0.488373	-1.5783	0.0137795	0.039884	1	1446	tags=18%, list=10%, signal=20%
1350	BROWNE_HCMV_INFECTION_20HR_UP	BROWNE_HCMV_INFECTION_20HR_UP		180	-0.386804	-1.57689	0	0.0403409	1	1739	tags=23%, list=12%, signal=26%
1351	HOELZEL_NF1_TARGETS_UP	HOELZEL_NF1_TARGETS_UP		87	-0.428999	-1.57678	0.00594059	0.0403636	1	2083	tags=29%, list=15%, signal=33%
1352	SCHAEFFER_PROSTATE_DEVELOPMENT_12HR_DN	SCHAEFFER_PROSTATE_DEVELOPMENT_12HR_DN		28	-0.533298	-1.57659	0.0226337	0.0403851	1	328	tags=18%, list=2%, signal=18%
1353	GO_REGULATION_OF_MRNA_CATABOLIC_PROCESS	GO_REGULATION_OF_MRNA_CATABOLIC_PROCESS		23	-0.558223	-1.57597	0.0313725	0.0405753	1	355	tags=17%, list=3%, signal=18%
1354	MARKS_HDAC_TARGETS_UP	MARKS_HDAC_TARGETS_UP		19	-0.596871	-1.57587	0.0208333	0.0405909	1	1707	tags=47%, list=12%, signal=54%
1355	KEGG_VIRAL_MYOCARDITIS	KEGG_VIRAL_MYOCARDITIS		50	-0.481196	-1.57534	0.00607287	0.0407457	1	2000	tags=22%, list=14%, signal=26%
1356	PRAMOONJAGO_SOX4_TARGETS_UP	PRAMOONJAGO_SOX4_TARGETS_UP		45	-0.485261	-1.57517	0.0162602	0.0407509	1	1114	tags=33%, list=8%, signal=36%
1357	GNF2_PPP6C	GNF2_PPP6C		33	-0.529991	-1.57496	0.0183299	0.0407788	1	4094	tags=52%, list=29%, signal=72%
1358	GENTILE_UV_LOW_DOSE_UP	GENTILE_UV_LOW_DOSE_UP		25	-0.559261	-1.57499	0.0228216	0.0407818	1	1384	tags=32%, list=10%, signal=35%
1359	GO_REGULATION_OF_B_CELL_APOPTOTIC_PROCESS	GO_REGULATION_OF_B_CELL_APOPTOTIC_PROCESS		17	-0.602634	-1.57501	0.045929	0.0407907	1	1550	tags=29%, list=11%, signal=33%
1360	BIOCARTA_EGF_PATHWAY	BIOCARTA_EGF_PATHWAY		29	-0.531423	-1.57476	0.027833	0.0408236	1	1182	tags=31%, list=8%, signal=34%
1361	GO_IMMUNOGLOBULIN_PRODUCTION	GO_IMMUNOGLOBULIN_PRODUCTION		33	-0.51063	-1.57477	0.0224949	0.0408389	1	536	tags=18%, list=4%, signal=19%
1362	HILLION_HMGA1B_TARGETS	HILLION_HMGA1B_TARGETS		72	-0.442947	-1.57441	0.00196464	0.0409145	1	1050	tags=15%, list=7%, signal=16%
1363	GO_POSITIVE_REGULATION_OF_LIPID_KINASE_ACTIVITY	GO_POSITIVE_REGULATION_OF_LIPID_KINASE_ACTIVITY		22	-0.574653	-1.57401	0.0231092	0.0410018	1	1386	tags=41%, list=10%, signal=45%
1364	HOQUE_METHYLATED_IN_CANCER	HOQUE_METHYLATED_IN_CANCER		38	-0.491465	-1.5733	0.0248447	0.0412292	1	914	tags=13%, list=6%, signal=14%
1365	GAZDA_DIAMOND_BLACKFAN_ANEMIA_PROGENITOR_UP	GAZDA_DIAMOND_BLACKFAN_ANEMIA_PROGENITOR_UP		33	-0.510544	-1.57297	0.0208333	0.0413082	1	1189	tags=21%, list=8%, signal=23%
1366	E2F1_UP.V1_DN	E2F1_UP.V1_DN		138	-0.40109	-1.57299	0.003663	0.0413141	1	1767	tags=26%, list=12%, signal=30%
1367	RUTELLA_RESPONSE_TO_CSF2RB_AND_IL4_DN	RUTELLA_RESPONSE_TO_CSF2RB_AND_IL4_DN		265	-0.37398	-1.57124	0	0.0419412	1	1340	tags=18%, list=9%, signal=20%
1368	GO_REGULATION_OF_SEQUESTERING_OF_CALCIUM_ION	GO_REGULATION_OF_SEQUESTERING_OF_CALCIUM_ION		71	-0.44824	-1.57108	0.00801603	0.0419829	1	1446	tags=18%, list=10%, signal=20%
1369	CAMP_UP.V1_DN	CAMP_UP.V1_DN		145	-0.400374	-1.57091	0.00176056	0.0420314	1	1102	tags=17%, list=8%, signal=18%
1370	SMID_BREAST_CANCER_NORMAL_LIKE_UP	SMID_BREAST_CANCER_NORMAL_LIKE_UP		316	-0.365612	-1.57047	0	0.0421615	1	1592	tags=21%, list=11%, signal=23%
1371	GO_NEGATIVE_REGULATION_OF_HEMOPOIESIS	GO_NEGATIVE_REGULATION_OF_HEMOPOIESIS		86	-0.427607	-1.56999	0.00193424	0.0422325	1	1396	tags=27%, list=10%, signal=29%
1372	MORI_PRE_BI_LYMPHOCYTE_DN	MORI_PRE_BI_LYMPHOCYTE_DN		64	-0.444454	-1.56977	0.00396825	0.0422801	1	1384	tags=23%, list=10%, signal=26%
1373	DUTERTRE_ESTRADIOL_RESPONSE_24HR_DN	DUTERTRE_ESTRADIOL_RESPONSE_24HR_DN		363	-0.360744	-1.56981	0.00173611	0.0422831	1	1403	tags=21%, list=10%, signal=22%
1374	GO_ACUTE_PHASE_RESPONSE	GO_ACUTE_PHASE_RESPONSE		25	-0.552536	-1.56892	0.0328542	0.0424218	1	631	tags=24%, list=4%, signal=25%
1375	COLINA_TARGETS_OF_4EBP1_AND_4EBP2	COLINA_TARGETS_OF_4EBP1_AND_4EBP2		283	-0.363955	-1.56918	0	0.0424354	1	1194	tags=14%, list=8%, signal=15%
1376	GO_ENZYME_INHIBITOR_ACTIVITY	GO_ENZYME_INHIBITOR_ACTIVITY		216	-0.377462	-1.56893	0	0.0424382	1	1721	tags=19%, list=12%, signal=21%
1377	GO_FC_RECEPTOR_SIGNALING_PATHWAY	GO_FC_RECEPTOR_SIGNALING_PATHWAY		163	-0.391882	-1.56897	0.00362976	0.042445	1	2777	tags=33%, list=20%, signal=41%
1378	GO_POSITIVE_REGULATION_OF_INTRACELLULAR_PROTEIN_TRANSPORT	GO_POSITIVE_REGULATION_OF_INTRACELLULAR_PROTEIN_TRANSPORT		186	-0.383687	-1.56903	0	0.0424543	1	2164	tags=25%, list=15%, signal=29%
1379	MYC_UP.V1_DN	MYC_UP.V1_DN		93	-0.430725	-1.56904	0.00397614	0.0424702	1	1191	tags=20%, list=8%, signal=22%
1380	REACTOME_SIGNALING_BY_PDGF	REACTOME_SIGNALING_BY_PDGF		92	-0.426267	-1.56829	0.00554529	0.0426218	1	1932	tags=24%, list=14%, signal=28%
1381	CHR8P12	CHR8P12		22	-0.560873	-1.56822	0.0342742	0.0426255	1	3152	tags=41%, list=22%, signal=53%
1382	GO_MEMBRANE_MICRODOMAIN	GO_MEMBRANE_MICRODOMAIN		205	-0.378392	-1.56769	0	0.0427568	1	1860	tags=20%, list=13%, signal=23%
1383	CHR11Q22	CHR11Q22		29	-0.530925	-1.56733	0.0258964	0.0428661	1	1921	tags=38%, list=14%, signal=44%
1384	DOANE_BREAST_CANCER_ESR1_DN	DOANE_BREAST_CANCER_ESR1_DN		25	-0.55615	-1.56712	0.0213592	0.0429202	1	3849	tags=68%, list=27%, signal=93%
1385	CHEN_LVAD_SUPPORT_OF_FAILING_HEART_DN	CHEN_LVAD_SUPPORT_OF_FAILING_HEART_DN		29	-0.529019	-1.56702	0.0262097	0.0429349	1	809	tags=21%, list=6%, signal=22%
1386	LEE_BMP2_TARGETS_UP	LEE_BMP2_TARGETS_UP		484	-0.346575	-1.56633	0	0.0431357	1	1732	tags=20%, list=12%, signal=22%
1387	CHIARADONNA_NEOPLASTIC_TRANSFORMATION_KRAS_CDC25_DN	CHIARADONNA_NEOPLASTIC_TRANSFORMATION_KRAS_CDC25_DN		41	-0.50407	-1.56635	0.0177165	0.0431448	1	1194	tags=22%, list=8%, signal=24%
1388	GO_EMBRYONIC_PLACENTA_MORPHOGENESIS	GO_EMBRYONIC_PLACENTA_MORPHOGENESIS		15	-0.620219	-1.56613	0.0342742	0.0431911	1	581	tags=27%, list=4%, signal=28%
1389	RIGGI_EWING_SARCOMA_PROGENITOR_UP	RIGGI_EWING_SARCOMA_PROGENITOR_UP		276	-0.3653	-1.56593	0	0.0432437	1	1765	tags=22%, list=12%, signal=24%
1390	GO_FRIZZLED_BINDING	GO_FRIZZLED_BINDING		18	-0.586199	-1.5656	0.0316832	0.043355	1	1818	tags=39%, list=13%, signal=45%
1391	GO_LYMPHOCYTE_DIFFERENTIATION	GO_LYMPHOCYTE_DIFFERENTIATION		148	-0.396448	-1.56524	0.0037594	0.0434173	1	1276	tags=25%, list=9%, signal=27%
1392	CTAGGAA_MIR384	CTAGGAA_MIR384		41	-0.497233	-1.56486	0.022541	0.0435532	1	1027	tags=20%, list=7%, signal=21%
1393	RUTELLA_RESPONSE_TO_HGF_DN	RUTELLA_RESPONSE_TO_HGF_DN		199	-0.381193	-1.56434	0.00361011	0.0437148	1	1853	tags=26%, list=13%, signal=30%
1394	MURAKAMI_UV_RESPONSE_6HR_UP	MURAKAMI_UV_RESPONSE_6HR_UP		27	-0.53954	-1.56367	0.0366599	0.0439283	1	1208	tags=30%, list=9%, signal=32%
1395	GO_NEGATIVE_REGULATION_OF_SMOOTH_MUSCLE_CELL_PROLIFERATION	GO_NEGATIVE_REGULATION_OF_SMOOTH_MUSCLE_CELL_PROLIFERATION		25	-0.543499	-1.5632	0.0225734	0.0440557	1	1514	tags=36%, list=11%, signal=40%
1396	GO_REGULATION_OF_MUSCLE_SYSTEM_PROCESS	GO_REGULATION_OF_MUSCLE_SYSTEM_PROCESS		121	-0.403836	-1.56323	0.00736648	0.0440599	1	1446	tags=20%, list=10%, signal=22%
1397	CERVERA_SDHB_TARGETS_1_UP	CERVERA_SDHB_TARGETS_1_UP		56	-0.46094	-1.56311	0.0152672	0.0440684	1	935	tags=16%, list=7%, signal=17%
1398	GO_NATURAL_KILLER_CELL_ACTIVATION	GO_NATURAL_KILLER_CELL_ACTIVATION		31	-0.522756	-1.56304	0.0167715	0.0440804	1	1104	tags=32%, list=8%, signal=35%
1399	GO_WOUND_HEALING	GO_WOUND_HEALING		318	-0.359544	-1.5626	0	0.0442054	1	2012	tags=20%, list=14%, signal=23%
1400	DAZARD_UV_RESPONSE_CLUSTER_G1	DAZARD_UV_RESPONSE_CLUSTER_G1		54	-0.46385	-1.56251	0.0160321	0.0442068	1	1046	tags=15%, list=7%, signal=16%
1401	LI_CISPLATIN_RESISTANCE_DN	LI_CISPLATIN_RESISTANCE_DN		25	-0.540261	-1.56191	0.0216963	0.0444253	1	2488	tags=44%, list=18%, signal=53%
1402	LENAOUR_DENDRITIC_CELL_MATURATION_UP	LENAOUR_DENDRITIC_CELL_MATURATION_UP		104	-0.413011	-1.56175	0.00954198	0.0444666	1	2012	tags=24%, list=14%, signal=28%
1403	CERIBELLI_GENES_INACTIVE_AND_BOUND_BY_NFY	CERIBELLI_GENES_INACTIVE_AND_BOUND_BY_NFY		24	-0.550884	-1.56126	0.0292398	0.0446374	1	1642	tags=25%, list=12%, signal=28%
1404	MCDOWELL_ACUTE_LUNG_INJURY_UP	MCDOWELL_ACUTE_LUNG_INJURY_UP		35	-0.505881	-1.5608	0.0236686	0.0447512	1	1799	tags=37%, list=13%, signal=42%
1405	GO_EMBRYONIC_EYE_MORPHOGENESIS	GO_EMBRYONIC_EYE_MORPHOGENESIS		15	-0.607365	-1.56067	0.036	0.0447808	1	230	tags=13%, list=2%, signal=14%
1406	GO_POSITIVE_REGULATION_OF_EPIDERMIS_DEVELOPMENT	GO_POSITIVE_REGULATION_OF_EPIDERMIS_DEVELOPMENT		18	-0.584663	-1.56056	0.0194805	0.044805	1	1088	tags=28%, list=8%, signal=30%
1407	NABA_CORE_MATRISOME	NABA_CORE_MATRISOME		113	-0.410899	-1.56031	0.00200401	0.0448551	1	3117	tags=35%, list=22%, signal=44%
1408	REACTOME_NFKB_AND_MAP_KINASES_ACTIVATION_MEDIATED_BY_TLR4_SIGNALING_REPERTOIRE	REACTOME_NFKB_AND_MAP_KINASES_ACTIVATION_MEDIATED_BY_TLR4_SIGNALING_REPERTOIRE		58	-0.456941	-1.56021	0.0121212	0.0448618	1	1565	tags=28%, list=11%, signal=31%
1409	GO_POSITIVE_REGULATION_OF_EPITHELIAL_CELL_APOPTOTIC_PROCESS	GO_POSITIVE_REGULATION_OF_EPITHELIAL_CELL_APOPTOTIC_PROCESS		15	-0.614469	-1.5599	0.0518672	0.044944	1	1615	tags=40%, list=11%, signal=45%
1410	HOLLMANN_APOPTOSIS_VIA_CD40_DN	HOLLMANN_APOPTOSIS_VIA_CD40_DN		223	-0.374961	-1.55949	0	0.04508	1	1897	tags=22%, list=13%, signal=25%
1411	STK33_UP	STK33_UP		233	-0.368261	-1.55912	0	0.0452107	1	1761	tags=28%, list=12%, signal=31%
1412	CHR22Q12	CHR22Q12		66	-0.446873	-1.55898	0.0170455	0.04524	1	836	tags=17%, list=6%, signal=18%
1413	GO_ACTIVATION_OF_JUN_KINASE_ACTIVITY	GO_ACTIVATION_OF_JUN_KINASE_ACTIVITY		30	-0.524763	-1.55842	0.0215686	0.0453965	1	904	tags=23%, list=6%, signal=25%
1414	LEE_AGING_CEREBELLUM_UP	LEE_AGING_CEREBELLUM_UP		65	-0.444447	-1.55817	0.00732601	0.0454687	1	1869	tags=23%, list=13%, signal=26%
1415	GO_POSITIVE_REGULATION_OF_ACTIN_FILAMENT_POLYMERIZATION	GO_POSITIVE_REGULATION_OF_ACTIN_FILAMENT_POLYMERIZATION		45	-0.481341	-1.5575	0.0221328	0.0456801	1	591	tags=18%, list=4%, signal=18%
1416	THEILGAARD_NEUTROPHIL_AT_SKIN_WOUND_UP	THEILGAARD_NEUTROPHIL_AT_SKIN_WOUND_UP		68	-0.449603	-1.55741	0.0153551	0.045708	1	2402	tags=41%, list=17%, signal=49%
1417	KAECH_NAIVE_VS_DAY8_EFF_CD8_TCELL_DN	KAECH_NAIVE_VS_DAY8_EFF_CD8_TCELL_DN		169	-0.38184	-1.55667	0.00177936	0.0459033	1	1098	tags=14%, list=8%, signal=15%
1418	JOHNSTONE_PARVB_TARGETS_1_DN	JOHNSTONE_PARVB_TARGETS_1_DN		41	-0.484694	-1.55673	0.0218688	0.0459141	1	1886	tags=34%, list=13%, signal=39%
1419	ONDER_CDH1_TARGETS_2_UP	ONDER_CDH1_TARGETS_2_UP		172	-0.385714	-1.55669	0.0056391	0.0459144	1	1174	tags=16%, list=8%, signal=18%
1420	GO_CYSTEINE_TYPE_ENDOPEPTIDASE_INHIBITOR_ACTIVITY	GO_CYSTEINE_TYPE_ENDOPEPTIDASE_INHIBITOR_ACTIVITY		28	-0.533292	-1.55638	0.0211416	0.0459974	1	2029	tags=29%, list=14%, signal=33%
1421	HOFMANN_CELL_LYMPHOMA_DN	HOFMANN_CELL_LYMPHOMA_DN		31	-0.515469	-1.55626	0.0146751	0.0460324	1	904	tags=23%, list=6%, signal=24%
1422	GO_REGULATION_OF_CALCIUM_ION_TRANSPORT	GO_REGULATION_OF_CALCIUM_ION_TRANSPORT		124	-0.401664	-1.55611	0.00701754	0.0460581	1	1118	tags=15%, list=8%, signal=16%
1423	GO_HEAT_SHOCK_PROTEIN_BINDING	GO_HEAT_SHOCK_PROTEIN_BINDING		70	-0.441529	-1.55532	0.00787402	0.0462921	1	1612	tags=23%, list=11%, signal=26%
1424	WARTERS_RESPONSE_TO_IR_SKIN	WARTERS_RESPONSE_TO_IR_SKIN		51	-0.459461	-1.55519	0.00796813	0.0463126	1	1180	tags=22%, list=8%, signal=23%
1425	MUNSHI_MULTIPLE_MYELOMA_UP	MUNSHI_MULTIPLE_MYELOMA_UP		72	-0.435476	-1.55491	0.00922509	0.0463907	1	1523	tags=21%, list=11%, signal=23%
1426	GRAHAM_CML_QUIESCENT_VS_NORMAL_QUIESCENT_UP	GRAHAM_CML_QUIESCENT_VS_NORMAL_QUIESCENT_UP		73	-0.435193	-1.55483	0.00988142	0.0464145	1	757	tags=12%, list=5%, signal=13%
1427	GO_REGULATION_OF_HUMORAL_IMMUNE_RESPONSE	GO_REGULATION_OF_HUMORAL_IMMUNE_RESPONSE		25	-0.547516	-1.55369	0.02079	0.0467859	1	1338	tags=20%, list=9%, signal=22%
1428	MIKKELSEN_IPS_LCP_WITH_H3K4ME3	MIKKELSEN_IPS_LCP_WITH_H3K4ME3		91	-0.417387	-1.5537	0.00578035	0.046803	1	1454	tags=23%, list=10%, signal=26%
1429	SATO_SILENCED_BY_DEACETYLATION_IN_PANCREATIC_CANCER	SATO_SILENCED_BY_DEACETYLATION_IN_PANCREATIC_CANCER		28	-0.527985	-1.55375	0.0245902	0.046803	1	892	tags=25%, list=6%, signal=27%
1430	GO_PODOSOME	GO_PODOSOME		20	-0.562183	-1.55341	0.0184805	0.0468636	1	2290	tags=35%, list=16%, signal=42%
1431	TARTE_PLASMA_CELL_VS_B_LYMPHOCYTE_DN	TARTE_PLASMA_CELL_VS_B_LYMPHOCYTE_DN		35	-0.499665	-1.55335	0.0195312	0.0468692	1	1087	tags=37%, list=8%, signal=40%
1432	ST_GAQ_PATHWAY	ST_GAQ_PATHWAY		23	-0.565172	-1.5532	0.0292276	0.0469067	1	1292	tags=35%, list=9%, signal=38%
1433	GO_REGULATION_OF_ENDOCRINE_PROCESS	GO_REGULATION_OF_ENDOCRINE_PROCESS		23	-0.541994	-1.55294	0.0264228	0.046996	1	1303	tags=26%, list=9%, signal=29%
1434	GO_REGULATION_OF_NUCLEASE_ACTIVITY	GO_REGULATION_OF_NUCLEASE_ACTIVITY		20	-0.573472	-1.55262	0.039823	0.0471106	1	1393	tags=30%, list=10%, signal=33%
1435	GO_REGULATION_OF_JUN_KINASE_ACTIVITY	GO_REGULATION_OF_JUN_KINASE_ACTIVITY		60	-0.449867	-1.55208	0.00369686	0.0472704	1	1467	tags=28%, list=10%, signal=31%
1436	GO_REGULATION_OF_RESPONSE_TO_REACTIVE_OXYGEN_SPECIES	GO_REGULATION_OF_RESPONSE_TO_REACTIVE_OXYGEN_SPECIES		24	-0.537732	-1.55198	0.0337302	0.047272	1	878	tags=25%, list=6%, signal=27%
1437	PROVENZANI_METASTASIS_DN	PROVENZANI_METASTASIS_DN		108	-0.413011	-1.55201	0.00383877	0.0472809	1	1209	tags=15%, list=9%, signal=16%
1438	ENGELMANN_CANCER_PROGENITORS_UP	ENGELMANN_CANCER_PROGENITORS_UP		37	-0.496109	-1.5512	0.0198807	0.0475245	1	1102	tags=27%, list=8%, signal=29%
1439	DARWICHE_PAPILLOMA_RISK_HIGH_UP	DARWICHE_PAPILLOMA_RISK_HIGH_UP		96	-0.416835	-1.55066	0.0130354	0.047728	1	819	tags=14%, list=6%, signal=14%
1440	GO_RESPONSE_TO_COLD	GO_RESPONSE_TO_COLD		32	-0.516724	-1.55037	0.0143149	0.0477913	1	1435	tags=31%, list=10%, signal=35%
1441	GO_POSITIVE_REGULATION_OF_CELLULAR_AMIDE_METABOLIC_PROCESS	GO_POSITIVE_REGULATION_OF_CELLULAR_AMIDE_METABOLIC_PROCESS		84	-0.428842	-1.5496	0.00570342	0.0480732	1	1561	tags=21%, list=11%, signal=24%
1442	GO_SIGNAL_TRANSDUCTION_IN_ABSENCE_OF_LIGAND	GO_SIGNAL_TRANSDUCTION_IN_ABSENCE_OF_LIGAND		23	-0.55102	-1.54954	0.0463158	0.0480861	1	1261	tags=39%, list=9%, signal=43%
1443	GO_POSITIVE_REGULATION_OF_EPITHELIAL_TO_MESENCHYMAL_TRANSITION	GO_POSITIVE_REGULATION_OF_EPITHELIAL_TO_MESENCHYMAL_TRANSITION		24	-0.561057	-1.54896	0.0375	0.0482359	1	1133	tags=29%, list=8%, signal=32%
1444	GO_REGULATION_OF_STRESS_ACTIVATED_PROTEIN_KINASE_SIGNALING_CASCADE	GO_REGULATION_OF_STRESS_ACTIVATED_PROTEIN_KINASE_SIGNALING_CASCADE		144	-0.391847	-1.54901	0.00181159	0.0482371	1	1176	tags=19%, list=8%, signal=20%
1445	ACAACTT_MIR382	ACAACTT_MIR382		57	-0.451581	-1.54882	0.019084	0.0482802	1	1377	tags=23%, list=10%, signal=25%
1446	PARK_TRETINOIN_RESPONSE_AND_PML_RARA_FUSION	PARK_TRETINOIN_RESPONSE_AND_PML_RARA_FUSION		28	-0.530557	-1.54839	0.0211416	0.0483308	1	1160	tags=32%, list=8%, signal=35%
1447	GO_REGULATION_OF_PROTEIN_TARGETING	GO_REGULATION_OF_PROTEIN_TARGETING		225	-0.369865	-1.54858	0	0.0483478	1	2164	tags=26%, list=15%, signal=30%
1448	GO_NEGATIVE_REGULATION_OF_CYTOKINE_BIOSYNTHETIC_PROCESS	GO_NEGATIVE_REGULATION_OF_CYTOKINE_BIOSYNTHETIC_PROCESS		19	-0.586376	-1.54842	0.037422	0.0483601	1	806	tags=37%, list=6%, signal=39%
1449	GO_RESPONSE_TO_EXTRACELLULAR_STIMULUS	GO_RESPONSE_TO_EXTRACELLULAR_STIMULUS		311	-0.359208	-1.54848	0	0.0483752	1	1210	tags=14%, list=9%, signal=15%
1450	GO_CELLULAR_RESPONSE_TO_EXTRACELLULAR_STIMULUS	GO_CELLULAR_RESPONSE_TO_EXTRACELLULAR_STIMULUS		140	-0.39575	-1.54742	0.00541516	0.048659	1	2145	tags=28%, list=15%, signal=32%
1451	PID_LYSOPHOSPHOLIPID_PATHWAY	PID_LYSOPHOSPHOLIPID_PATHWAY		53	-0.456094	-1.5472	0.00988142	0.0487244	1	1292	tags=25%, list=9%, signal=27%
1452	ONGUSAHA_TP53_TARGETS	ONGUSAHA_TP53_TARGETS		32	-0.507041	-1.5469	0.0332031	0.0488211	1	1384	tags=25%, list=10%, signal=28%
1453	MIYAGAWA_TARGETS_OF_EWSR1_ETS_FUSIONS_DN	MIYAGAWA_TARGETS_OF_EWSR1_ETS_FUSIONS_DN		148	-0.385105	-1.54687	0.00357143	0.0488248	1	2224	tags=28%, list=16%, signal=33%
1454	RODRIGUES_THYROID_CARCINOMA_DN	RODRIGUES_THYROID_CARCINOMA_DN		59	-0.456877	-1.54662	0.0155039	0.0489046	1	1400	tags=20%, list=10%, signal=22%
1455	KOYAMA_SEMA3B_TARGETS_DN	KOYAMA_SEMA3B_TARGETS_DN		283	-0.361888	-1.5462	0	0.0490665	1	1742	tags=21%, list=12%, signal=23%
1456	GO_ANTIGEN_RECEPTOR_MEDIATED_SIGNALING_PATHWAY	GO_ANTIGEN_RECEPTOR_MEDIATED_SIGNALING_PATHWAY		145	-0.391057	-1.54611	0.00190476	0.0490722	1	2808	tags=35%, list=20%, signal=43%
1457	GO_REGULATION_OF_PROTEIN_MODIFICATION_BY_SMALL_PROTEIN_CONJUGATION_OR_REMOVAL	GO_REGULATION_OF_PROTEIN_MODIFICATION_BY_SMALL_PROTEIN_CONJUGATION_OR_REMOVAL		233	-0.372388	-1.54577	0	0.0491614	1	1106	tags=16%, list=8%, signal=17%
1458	GO_REGULATION_OF_RESPONSE_TO_OXIDATIVE_STRESS	GO_REGULATION_OF_RESPONSE_TO_OXIDATIVE_STRESS		47	-0.478299	-1.54581	0.0182927	0.0491644	1	1170	tags=19%, list=8%, signal=21%
1459	GO_POSITIVE_REGULATION_OF_PROTEIN_COMPLEX_ASSEMBLY	GO_POSITIVE_REGULATION_OF_PROTEIN_COMPLEX_ASSEMBLY		147	-0.391802	-1.54566	0.00373134	0.0491862	1	1426	tags=16%, list=10%, signal=18%
1460	WIEDERSCHAIN_TARGETS_OF_BMI1_AND_PCGF2	WIEDERSCHAIN_TARGETS_OF_BMI1_AND_PCGF2		42	-0.484732	-1.54512	0.0371134	0.0493441	1	558	tags=19%, list=4%, signal=20%
1461	GO_MYELOID_LEUKOCYTE_MEDIATED_IMMUNITY	GO_MYELOID_LEUKOCYTE_MEDIATED_IMMUNITY		29	-0.526949	-1.54502	0.0318725	0.0493653	1	1540	tags=28%, list=11%, signal=31%
1462	GO_NEGATIVE_REGULATION_OF_CELL_DIFFERENTIATION	GO_NEGATIVE_REGULATION_OF_CELL_DIFFERENTIATION		354	-0.352832	-1.5448	0	0.0494148	1	2547	tags=29%, list=18%, signal=34%
1463	CHEBOTAEV_GR_TARGETS_UP	CHEBOTAEV_GR_TARGETS_UP		56	-0.456344	-1.54483	0.0133843	0.0494189	1	946	tags=20%, list=7%, signal=21%
1464	GO_ADHERENS_JUNCTION_ORGANIZATION	GO_ADHERENS_JUNCTION_ORGANIZATION		42	-0.489045	-1.54459	0.0140562	0.049491	1	2216	tags=33%, list=16%, signal=39%
1465	KASLER_HDAC7_TARGETS_1_DN	KASLER_HDAC7_TARGETS_1_DN		16	-0.609061	-1.54402	0.0274841	0.0496859	1	1082	tags=25%, list=8%, signal=27%
1466	HADDAD_T_LYMPHOCYTE_AND_NK_PROGENITOR_DN	HADDAD_T_LYMPHOCYTE_AND_NK_PROGENITOR_DN		48	-0.475246	-1.54406	0.0199601	0.0496861	1	1889	tags=29%, list=13%, signal=34%
1467	GNF2_CDH11	GNF2_CDH11		19	-0.58538	-1.54372	0.0230608	0.049796	1	709	tags=16%, list=5%, signal=17%
1468	PID_NFKAPPAB_ATYPICAL_PATHWAY	PID_NFKAPPAB_ATYPICAL_PATHWAY		16	-0.601777	-1.54355	0.0261569	0.0498457	1	1182	tags=44%, list=8%, signal=48%
1469	VECCHI_GASTRIC_CANCER_EARLY_DN	VECCHI_GASTRIC_CANCER_EARLY_DN		199	-0.374053	-1.54328	0.00176056	0.0499464	1	1847	tags=23%, list=13%, signal=26%
1470	GO_POSITIVE_REGULATION_OF_LIPID_TRANSPORT	GO_POSITIVE_REGULATION_OF_LIPID_TRANSPORT		35	-0.493483	-1.54308	0.028169	0.0499967	1	1418	tags=20%, list=10%, signal=22%
1471	GROSS_HYPOXIA_VIA_ELK3_AND_HIF1A_UP	GROSS_HYPOXIA_VIA_ELK3_AND_HIF1A_UP		107	-0.409446	-1.54292	0.00555556	0.0500458	1	1103	tags=24%, list=8%, signal=26%
1472	SASAKI_ADULT_T_CELL_LEUKEMIA	SASAKI_ADULT_T_CELL_LEUKEMIA		151	-0.389696	-1.54224	0.00367647	0.0503268	1	832	tags=12%, list=6%, signal=13%
1473	GO_MODULATION_OF_TRANSCRIPTION_IN_OTHER_ORGANISM_INVOLVED_IN_SYMBIOTIC_INTERACTION	GO_MODULATION_OF_TRANSCRIPTION_IN_OTHER_ORGANISM_INVOLVED_IN_SYMBIOTIC_INTERACTION		17	-0.590705	-1.54193	0.0414079	0.050441	1	68	tags=12%, list=0%, signal=12%
1474	BIOCARTA_IL6_PATHWAY	BIOCARTA_IL6_PATHWAY		22	-0.554955	-1.54165	0.028866	0.050526	1	2726	tags=55%, list=19%, signal=67%
1475	GO_PROTEIN_KINASE_C_BINDING	GO_PROTEIN_KINASE_C_BINDING		38	-0.496018	-1.54153	0.0421053	0.0505416	1	1155	tags=18%, list=8%, signal=20%
1476	REACTOME_CD28_CO_STIMULATION	REACTOME_CD28_CO_STIMULATION		28	-0.523362	-1.54091	0.0366599	0.0507665	1	1000	tags=21%, list=7%, signal=23%
1477	GO_REGULATION_OF_FAT_CELL_DIFFERENTIATION	GO_REGULATION_OF_FAT_CELL_DIFFERENTIATION		61	-0.451236	-1.54072	0.0196464	0.0508236	1	1889	tags=26%, list=13%, signal=30%
1478	GO_LYMPHOCYTE_ACTIVATION_INVOLVED_IN_IMMUNE_RESPONSE	GO_LYMPHOCYTE_ACTIVATION_INVOLVED_IN_IMMUNE_RESPONSE		70	-0.434923	-1.54067	0.00996016	0.0508275	1	1127	tags=26%, list=8%, signal=28%
1479	STAT5A_01	STAT5A_01		155	-0.387258	-1.54041	0.00539568	0.0508985	1	2201	tags=27%, list=16%, signal=32%
1480	GO_CELLULAR_RESPONSE_TO_INTERLEUKIN_6	GO_CELLULAR_RESPONSE_TO_INTERLEUKIN_6		18	-0.583401	-1.54013	0.0461216	0.0509803	1	2471	tags=50%, list=17%, signal=60%
1481	GO_EXTRACELLULAR_STRUCTURE_ORGANIZATION	GO_EXTRACELLULAR_STRUCTURE_ORGANIZATION		182	-0.378928	-1.54009	0	0.0509811	1	2592	tags=26%, list=18%, signal=31%
1482	GO_REGULATION_OF_PROTEIN_TYROSINE_KINASE_ACTIVITY	GO_REGULATION_OF_PROTEIN_TYROSINE_KINASE_ACTIVITY		46	-0.475083	-1.53998	0.0203252	0.0509833	1	2316	tags=30%, list=16%, signal=36%
1483	BROWNE_HCMV_INFECTION_10HR_UP	BROWNE_HCMV_INFECTION_10HR_UP		82	-0.426026	-1.54001	0.00938086	0.0509945	1	1993	tags=28%, list=14%, signal=32%
1484	BIOCARTA_KERATINOCYTE_PATHWAY	BIOCARTA_KERATINOCYTE_PATHWAY		41	-0.483944	-1.53971	0.030426	0.0510568	1	1564	tags=34%, list=11%, signal=38%
1485	GO_PEPTIDYL_TYROSINE_AUTOPHOSPHORYLATION	GO_PEPTIDYL_TYROSINE_AUTOPHOSPHORYLATION		30	-0.509584	-1.53947	0.0344828	0.0511405	1	1281	tags=27%, list=9%, signal=29%
1486	GO_CYTOSOLIC_SMALL_RIBOSOMAL_SUBUNIT	GO_CYTOSOLIC_SMALL_RIBOSOMAL_SUBUNIT		37	-0.493429	-1.53895	0.0193133	0.0513357	1	7208	tags=100%, list=51%, signal=203%
1487	HERNANDEZ_MITOTIC_ARREST_BY_DOCETAXEL_1_UP	HERNANDEZ_MITOTIC_ARREST_BY_DOCETAXEL_1_UP		23	-0.549165	-1.53853	0.0562771	0.051473	1	1437	tags=22%, list=10%, signal=24%
1488	GO_MUSCLE_ADAPTATION	GO_MUSCLE_ADAPTATION		18	-0.577954	-1.53832	0.0453608	0.0515256	1	703	tags=28%, list=5%, signal=29%
1489	GO_CELLULAR_RESPONSE_TO_AMINO_ACID_STIMULUS	GO_CELLULAR_RESPONSE_TO_AMINO_ACID_STIMULUS		36	-0.508214	-1.53816	0.0159046	0.0515771	1	1604	tags=25%, list=11%, signal=28%
1490	XU_HGF_TARGETS_REPRESSED_BY_AKT1_DN	XU_HGF_TARGETS_REPRESSED_BY_AKT1_DN		74	-0.43196	-1.53737	0.0170455	0.0518449	1	1593	tags=22%, list=11%, signal=24%
1491	LY_AGING_PREMATURE_DN	LY_AGING_PREMATURE_DN		27	-0.523506	-1.53705	0.0502092	0.0519639	1	813	tags=19%, list=6%, signal=20%
1492	BRUECKNER_TARGETS_OF_MIRLET7A3_DN	BRUECKNER_TARGETS_OF_MIRLET7A3_DN		55	-0.455193	-1.53659	0.02	0.0521524	1	2714	tags=35%, list=19%, signal=43%
1493	YAMASHITA_METHYLATED_IN_PROSTATE_CANCER	YAMASHITA_METHYLATED_IN_PROSTATE_CANCER		32	-0.505147	-1.5364	0.0280561	0.052218	1	2086	tags=28%, list=15%, signal=33%
1494	BOYAULT_LIVER_CANCER_SUBCLASS_G2	BOYAULT_LIVER_CANCER_SUBCLASS_G2		24	-0.551022	-1.53627	0.0518672	0.0522507	1	1400	tags=29%, list=10%, signal=32%
1495	PID_MYC_REPRESS_PATHWAY	PID_MYC_REPRESS_PATHWAY		55	-0.461072	-1.53603	0.0188324	0.0523345	1	1613	tags=24%, list=11%, signal=27%
1496	GALE_APL_WITH_FLT3_MUTATED_DN	GALE_APL_WITH_FLT3_MUTATED_DN		16	-0.585468	-1.53557	0.0402542	0.0524649	1	16	tags=6%, list=0%, signal=6%
1497	GO_POSITIVE_REGULATION_OF_CANONICAL_WNT_SIGNALING_PATHWAY	GO_POSITIVE_REGULATION_OF_CANONICAL_WNT_SIGNALING_PATHWAY		85	-0.422155	-1.53536	0.0205224	0.0525362	1	2108	tags=26%, list=15%, signal=30%
1498	LABBE_TARGETS_OF_TGFB1_AND_WNT3A_UP	LABBE_TARGETS_OF_TGFB1_AND_WNT3A_UP		79	-0.429934	-1.53451	0.00595238	0.0528566	1	1754	tags=22%, list=12%, signal=24%
1499	GO_NEGATIVE_REGULATION_OF_INTRACELLULAR_SIGNAL_TRANSDUCTION	GO_NEGATIVE_REGULATION_OF_INTRACELLULAR_SIGNAL_TRANSDUCTION		329	-0.351384	-1.53396	0	0.053027	1	1536	tags=17%, list=11%, signal=19%
1500	PID_PI3KCI_AKT_PATHWAY	PID_PI3KCI_AKT_PATHWAY		29	-0.50296	-1.53399	0.0348361	0.0530299	1	1426	tags=24%, list=10%, signal=27%
1501	GO_PHAGOCYTIC_CUP	GO_PHAGOCYTIC_CUP		16	-0.59166	-1.53389	0.0586907	0.053035	1	878	tags=19%, list=6%, signal=20%
1502	PENG_LEUCINE_DEPRIVATION_UP	PENG_LEUCINE_DEPRIVATION_UP		114	-0.401438	-1.53378	0	0.0530598	1	2103	tags=25%, list=15%, signal=30%
1503	GO_REGULATION_OF_PROTEIN_EXPORT_FROM_NUCLEUS	GO_REGULATION_OF_PROTEIN_EXPORT_FROM_NUCLEUS		30	-0.520581	-1.5337	0.0362173	0.0530816	1	1163	tags=23%, list=8%, signal=25%
1504	HAHTOLA_MYCOSIS_FUNGOIDES_SKIN_DN	HAHTOLA_MYCOSIS_FUNGOIDES_SKIN_DN		25	-0.531808	-1.53349	0.0251046	0.0531572	1	127	tags=8%, list=1%, signal=8%
1505	GO_JNK_CASCADE	GO_JNK_CASCADE		66	-0.444265	-1.53238	0.018622	0.0536591	1	1393	tags=23%, list=10%, signal=25%
1506	GO_MYELOID_CELL_DIFFERENTIATION	GO_MYELOID_CELL_DIFFERENTIATION		150	-0.383576	-1.53167	0.00359066	0.0539515	1	1857	tags=25%, list=13%, signal=28%
1507	GO_REGULATION_OF_NATURAL_KILLER_CELL_ACTIVATION	GO_REGULATION_OF_NATURAL_KILLER_CELL_ACTIVATION		20	-0.569847	-1.53138	0.0305011	0.0540308	1	1483	tags=35%, list=10%, signal=39%
1508	IK1_01	IK1_01		170	-0.380691	-1.53119	0.00189394	0.0541119	1	2086	tags=26%, list=15%, signal=30%
1509	CLASPER_LYMPHATIC_VESSELS_DURING_METASTASIS_UP	CLASPER_LYMPHATIC_VESSELS_DURING_METASTASIS_UP		17	-0.605587	-1.53063	0.0421941	0.0543131	1	879	tags=35%, list=6%, signal=38%
1510	REACTOME_DOWNSTREAM_SIGNAL_TRANSDUCTION	REACTOME_DOWNSTREAM_SIGNAL_TRANSDUCTION		76	-0.4275	-1.52957	0.0147874	0.05476	1	1426	tags=21%, list=10%, signal=23%
1511	WILCOX_RESPONSE_TO_PROGESTERONE_DN	WILCOX_RESPONSE_TO_PROGESTERONE_DN		37	-0.48972	-1.52913	0.0309278	0.0548613	1	1002	tags=19%, list=7%, signal=20%
1512	KEGG_RIBOSOME	KEGG_RIBOSOME		77	-0.424826	-1.52917	0.0114723	0.0548644	1	8196	tags=100%, list=58%, signal=235%
1513	GO_CELLULAR_CHEMICAL_HOMEOSTASIS	GO_CELLULAR_CHEMICAL_HOMEOSTASIS		352	-0.347922	-1.52926	0.00166113	0.0548841	1	2292	tags=24%, list=16%, signal=27%
1514	GO_REGULATION_OF_ANOIKIS	GO_REGULATION_OF_ANOIKIS		21	-0.549248	-1.52876	0.0483193	0.0549328	1	1397	tags=29%, list=10%, signal=32%
1515	GO_REGULATION_OF_HOMEOSTATIC_PROCESS	GO_REGULATION_OF_HOMEOSTATIC_PROCESS		306	-0.348879	-1.52857	0.00167785	0.055004	1	1152	tags=13%, list=8%, signal=14%
1516	GO_POSITIVE_REGULATION_OF_STEM_CELL_DIFFERENTIATION	GO_POSITIVE_REGULATION_OF_STEM_CELL_DIFFERENTIATION		33	-0.514344	-1.52843	0.0194932	0.0550543	1	2034	tags=33%, list=14%, signal=39%
1517	GO_NEGATIVE_REGULATION_OF_MYOBLAST_DIFFERENTIATION	GO_NEGATIVE_REGULATION_OF_MYOBLAST_DIFFERENTIATION		15	-0.607517	-1.52832	0.0429448	0.055081	1	1088	tags=33%, list=8%, signal=36%
1518	GO_LIPID_PARTICLE	GO_LIPID_PARTICLE		38	-0.483183	-1.52794	0.0180361	0.055139	1	938	tags=18%, list=7%, signal=20%
1519	PICCALUGA_ANGIOIMMUNOBLASTIC_LYMPHOMA_DN	PICCALUGA_ANGIOIMMUNOBLASTIC_LYMPHOMA_DN		110	-0.395508	-1.52797	0.003861	0.0551471	1	1173	tags=27%, list=8%, signal=29%
1520	GO_PROTEIN_ACTIVATION_CASCADE	GO_PROTEIN_ACTIVATION_CASCADE		39	-0.48768	-1.528	0.0229645	0.0551527	1	1338	tags=15%, list=9%, signal=17%
1521	GO_MEMBRANE_PROTEIN_ECTODOMAIN_PROTEOLYSIS	GO_MEMBRANE_PROTEIN_ECTODOMAIN_PROTEOLYSIS		18	-0.565119	-1.52745	0.0424628	0.0553209	1	2039	tags=28%, list=14%, signal=32%
1522	KEGG_AMYOTROPHIC_LATERAL_SCLEROSIS_ALS	KEGG_AMYOTROPHIC_LATERAL_SCLEROSIS_ALS		40	-0.485223	-1.52735	0.0308008	0.055345	1	1503	tags=30%, list=11%, signal=33%
1523	GO_RNA_POLYADENYLATION	GO_RNA_POLYADENYLATION		25	-0.535773	-1.5269	0.0290135	0.0554012	1	1866	tags=32%, list=13%, signal=37%
1524	KRAS.300_UP.V1_DN	KRAS.300_UP.V1_DN		64	-0.438196	-1.52668	0.0135397	0.0554531	1	598	tags=13%, list=4%, signal=13%
1525	SNIJDERS_AMPLIFIED_IN_HEAD_AND_NECK_TUMORS	SNIJDERS_AMPLIFIED_IN_HEAD_AND_NECK_TUMORS		31	-0.508941	-1.52668	0.0413223	0.0554725	1	1812	tags=32%, list=13%, signal=37%
1526	GO_PANCREAS_DEVELOPMENT	GO_PANCREAS_DEVELOPMENT		36	-0.498172	-1.52646	0.0275049	0.0555272	1	2220	tags=42%, list=16%, signal=49%
1527	GO_ENDOPLASMIC_RETICULUM_CALCIUM_ION_HOMEOSTASIS	GO_ENDOPLASMIC_RETICULUM_CALCIUM_ION_HOMEOSTASIS		17	-0.580743	-1.5262	0.05	0.0555899	1	1044	tags=24%, list=7%, signal=25%
1528	MEL18_DN.V1_DN	MEL18_DN.V1_DN		94	-0.411671	-1.52616	0.0111317	0.0555919	1	1386	tags=22%, list=10%, signal=25%
1529	NOUSHMEHR_GBM_SILENCED_BY_METHYLATION	NOUSHMEHR_GBM_SILENCED_BY_METHYLATION		33	-0.49358	-1.52606	0.0305499	0.0555934	1	1515	tags=24%, list=11%, signal=27%
1530	GO_RESPONSE_TO_ATP	GO_RESPONSE_TO_ATP		22	-0.564476	-1.52628	0.047817	0.0555966	1	1096	tags=27%, list=8%, signal=30%
1531	GO_POSITIVE_REGULATION_OF_RELEASE_OF_SEQUESTERED_CALCIUM_ION_INTO_CYTOSOL	GO_POSITIVE_REGULATION_OF_RELEASE_OF_SEQUESTERED_CALCIUM_ION_INTO_CYTOSOL		22	-0.552059	-1.52621	0.0345572	0.0556073	1	1446	tags=23%, list=10%, signal=25%
1532	GO_RESPONSE_TO_FUNGUS	GO_RESPONSE_TO_FUNGUS		29	-0.509508	-1.5255	0.0326087	0.0557422	1	1161	tags=17%, list=8%, signal=19%
1533	GO_CARDIAC_ATRIUM_DEVELOPMENT	GO_CARDIAC_ATRIUM_DEVELOPMENT		19	-0.568912	-1.52552	0.0292135	0.0557592	1	1088	tags=26%, list=8%, signal=28%
1534	ZHANG_RESPONSE_TO_CANTHARIDIN_UP	ZHANG_RESPONSE_TO_CANTHARIDIN_UP		17	-0.572139	-1.52553	0.0409483	0.0557738	1	1606	tags=47%, list=11%, signal=53%
1535	DALESSIO_TSA_RESPONSE	DALESSIO_TSA_RESPONSE		16	-0.597262	-1.52515	0.0576541	0.0558454	1	2696	tags=69%, list=19%, signal=85%
1536	LEF1_UP.V1_DN	LEF1_UP.V1_DN		120	-0.396335	-1.52508	0.00201207	0.0558594	1	1262	tags=20%, list=9%, signal=22%
1537	DUAN_PRDM5_TARGETS	DUAN_PRDM5_TARGETS		45	-0.474365	-1.52472	0.0225564	0.0560114	1	1733	tags=29%, list=12%, signal=33%
1538	DEMAGALHAES_AGING_UP	DEMAGALHAES_AGING_UP		47	-0.46991	-1.52415	0.0242915	0.0562227	1	2477	tags=28%, list=17%, signal=33%
1539	GO_CELLULAR_RESPONSE_TO_KETONE	GO_CELLULAR_RESPONSE_TO_KETONE		52	-0.456088	-1.52403	0.0199203	0.0562593	1	1344	tags=23%, list=9%, signal=25%
1540	GO_ACTIVATION_OF_MAPK_ACTIVITY	GO_ACTIVATION_OF_MAPK_ACTIVITY		92	-0.414131	-1.52363	0.00594059	0.0563714	1	1606	tags=20%, list=11%, signal=22%
1541	GERHOLD_ADIPOGENESIS_UP	GERHOLD_ADIPOGENESIS_UP		42	-0.483527	-1.52371	0.0244361	0.0563742	1	813	tags=19%, list=6%, signal=20%
1542	DITTMER_PTHLH_TARGETS_DN	DITTMER_PTHLH_TARGETS_DN		67	-0.432623	-1.52346	0.0221811	0.0564373	1	1146	tags=19%, list=8%, signal=21%
1543	GO_CELL_DIFFERENTIATION_INVOLVED_IN_EMBRYONIC_PLACENTA_DEVELOPMENT	GO_CELL_DIFFERENTIATION_INVOLVED_IN_EMBRYONIC_PLACENTA_DEVELOPMENT		16	-0.589495	-1.52292	0.0412371	0.0566322	1	2270	tags=44%, list=16%, signal=52%
1544	LUI_TARGETS_OF_PAX8_PPARG_FUSION	LUI_TARGETS_OF_PAX8_PPARG_FUSION		25	-0.53486	-1.52268	0.0365854	0.0567236	1	773	tags=12%, list=5%, signal=13%
1545	BORCZUK_MALIGNANT_MESOTHELIOMA_DN	BORCZUK_MALIGNANT_MESOTHELIOMA_DN		54	-0.454116	-1.52255	0.0254403	0.0567593	1	1450	tags=22%, list=10%, signal=25%
1546	DIRMEIER_LMP1_RESPONSE_LATE_DN	DIRMEIER_LMP1_RESPONSE_LATE_DN		31	-0.509448	-1.52232	0.0288066	0.0568149	1	1273	tags=19%, list=9%, signal=21%
1547	GO_HETEROPHILIC_CELL_CELL_ADHESION_VIA_PLASMA_MEMBRANE_CELL_ADHESION_MOLECULES	GO_HETEROPHILIC_CELL_CELL_ADHESION_VIA_PLASMA_MEMBRANE_CELL_ADHESION_MOLECULES		23	-0.540236	-1.52197	0.0262097	0.0569456	1	2302	tags=48%, list=16%, signal=57%
1548	REACTOME_SEMA4D_IN_SEMAPHORIN_SIGNALING	REACTOME_SEMA4D_IN_SEMAPHORIN_SIGNALING		23	-0.542356	-1.52174	0.0574468	0.0570409	1	849	tags=22%, list=6%, signal=23%
1549	ZHAN_V1_LATE_DIFFERENTIATION_GENES_UP	ZHAN_V1_LATE_DIFFERENTIATION_GENES_UP		30	-0.51203	-1.52169	0.0438247	0.0570434	1	521	tags=17%, list=4%, signal=17%
1550	GNF2_CD53	GNF2_CD53		54	-0.448464	-1.5215	0.0246212	0.0570698	1	2491	tags=33%, list=18%, signal=40%
1551	NCX_01	NCX_01		105	-0.403591	-1.52138	0.0114723	0.0570986	1	2430	tags=33%, list=17%, signal=40%
1552	TSUNODA_CISPLATIN_RESISTANCE_DN	TSUNODA_CISPLATIN_RESISTANCE_DN		38	-0.489226	-1.52118	0.0318091	0.0571677	1	1030	tags=21%, list=7%, signal=23%
1553	MARSHALL_VIRAL_INFECTION_RESPONSE_DN	MARSHALL_VIRAL_INFECTION_RESPONSE_DN		23	-0.532775	-1.52107	0.0368217	0.0571936	1	832	tags=35%, list=6%, signal=37%
1554	KIM_BIPOLAR_DISORDER_OLIGODENDROCYTE_DENSITY_CORR_DN	KIM_BIPOLAR_DISORDER_OLIGODENDROCYTE_DENSITY_CORR_DN		32	-0.507156	-1.52097	0.0456349	0.0572146	1	878	tags=22%, list=6%, signal=23%
1555	BIOCARTA_MITOCHONDRIA_PATHWAY	BIOCARTA_MITOCHONDRIA_PATHWAY		17	-0.597163	-1.52067	0.0393013	0.0573294	1	1198	tags=41%, list=8%, signal=45%
1556	GENTILE_UV_RESPONSE_CLUSTER_D7	GENTILE_UV_RESPONSE_CLUSTER_D7		36	-0.493002	-1.52046	0.0359408	0.0574045	1	1707	tags=33%, list=12%, signal=38%
1557	GO_POSITIVE_REGULATION_OF_CAMP_METABOLIC_PROCESS	GO_POSITIVE_REGULATION_OF_CAMP_METABOLIC_PROCESS		44	-0.46806	-1.52036	0.0252427	0.0574265	1	1078	tags=20%, list=8%, signal=22%
1558	GO_NEGATIVE_REGULATION_OF_SEQUENCE_SPECIFIC_DNA_BINDING_TRANSCRIPTION_FACTOR_ACTIVITY	GO_NEGATIVE_REGULATION_OF_SEQUENCE_SPECIFIC_DNA_BINDING_TRANSCRIPTION_FACTOR_ACTIVITY		98	-0.405897	-1.52008	0.00719425	0.0575475	1	482	tags=15%, list=3%, signal=16%
1559	GO_OVULATION_CYCLE	GO_OVULATION_CYCLE		70	-0.426182	-1.52001	0.0251938	0.0575565	1	1198	tags=19%, list=8%, signal=20%
1560	GO_NEURAL_NUCLEUS_DEVELOPMENT	GO_NEURAL_NUCLEUS_DEVELOPMENT		49	-0.465485	-1.51977	0.0257937	0.0576266	1	582	tags=12%, list=4%, signal=13%
1561	GO_REGULATION_OF_OXIDATIVE_STRESS_INDUCED_INTRINSIC_APOPTOTIC_SIGNALING_PATHWAY	GO_REGULATION_OF_OXIDATIVE_STRESS_INDUCED_INTRINSIC_APOPTOTIC_SIGNALING_PATHWAY		23	-0.531046	-1.51896	0.0329897	0.0579884	1	1170	tags=17%, list=8%, signal=19%
1562	HUMMERICH_SKIN_CANCER_PROGRESSION_UP	HUMMERICH_SKIN_CANCER_PROGRESSION_UP		67	-0.43054	-1.51896	0.0330097	0.0580094	1	2169	tags=31%, list=15%, signal=37%
1563	BOYLAN_MULTIPLE_MYELOMA_D_CLUSTER_UP	BOYLAN_MULTIPLE_MYELOMA_D_CLUSTER_UP		21	-0.548805	-1.51858	0.0425963	0.0580855	1	700	tags=19%, list=5%, signal=20%
1564	YAGI_AML_WITH_T_8_21_TRANSLOCATION	YAGI_AML_WITH_T_8_21_TRANSLOCATION		282	-0.354395	-1.51847	0	0.058118	1	2484	tags=25%, list=18%, signal=29%
1565	PID_ALPHA_SYNUCLEIN_PATHWAY	PID_ALPHA_SYNUCLEIN_PATHWAY		28	-0.525113	-1.51805	0.0324675	0.0582382	1	1292	tags=25%, list=9%, signal=27%
1566	TURASHVILI_BREAST_LOBULAR_CARCINOMA_VS_DUCTAL_NORMAL_UP	TURASHVILI_BREAST_LOBULAR_CARCINOMA_VS_DUCTAL_NORMAL_UP		39	-0.483832	-1.51787	0.0245902	0.0583116	1	1216	tags=23%, list=9%, signal=25%
1567	GO_ENDOCRINE_PROCESS	GO_ENDOCRINE_PROCESS		20	-0.56291	-1.51684	0.0467836	0.0587109	1	2783	tags=40%, list=20%, signal=50%
1568	BIOCARTA_FAS_PATHWAY	BIOCARTA_FAS_PATHWAY		30	-0.506801	-1.51657	0.0412371	0.0588149	1	1825	tags=37%, list=13%, signal=42%
1569	GO_PITUITARY_GLAND_DEVELOPMENT	GO_PITUITARY_GLAND_DEVELOPMENT		17	-0.57006	-1.51624	0.0462185	0.0589379	1	1487	tags=24%, list=10%, signal=26%
1570	KAYO_AGING_MUSCLE_UP	KAYO_AGING_MUSCLE_UP		150	-0.38254	-1.51614	0.00190476	0.0589729	1	1445	tags=22%, list=10%, signal=24%
1571	WEST_ADRENOCORTICAL_TUMOR_MARKERS_UP	WEST_ADRENOCORTICAL_TUMOR_MARKERS_UP		18	-0.569115	-1.516	0.0543933	0.0589925	1	885	tags=22%, list=6%, signal=24%
1572	RELA_DN.V1_DN	RELA_DN.V1_DN		74	-0.428175	-1.51575	0.0175439	0.0590512	1	1652	tags=19%, list=12%, signal=21%
1573	GO_REGULATION_OF_PROTEIN_PHOSPHATASE_TYPE_2A_ACTIVITY	GO_REGULATION_OF_PROTEIN_PHOSPHATASE_TYPE_2A_ACTIVITY		19	-0.564364	-1.51561	0.0409836	0.0590952	1	1083	tags=21%, list=8%, signal=23%
1574	GO_MYELOID_LEUKOCYTE_DIFFERENTIATION	GO_MYELOID_LEUKOCYTE_DIFFERENTIATION		74	-0.427128	-1.51543	0.0134615	0.0591517	1	1550	tags=27%, list=11%, signal=30%
1575	GO_RESPONSE_TO_TRANSITION_METAL_NANOPARTICLE	GO_RESPONSE_TO_TRANSITION_METAL_NANOPARTICLE		112	-0.397644	-1.51436	0.00362976	0.0595852	1	2170	tags=27%, list=15%, signal=31%
1576	ABE_INNER_EAR	ABE_INNER_EAR		27	-0.519999	-1.5143	0.0378151	0.0595947	1	1949	tags=15%, list=14%, signal=17%
1577	XU_HGF_SIGNALING_NOT_VIA_AKT1_48HR_DN	XU_HGF_SIGNALING_NOT_VIA_AKT1_48HR_DN		16	-0.582027	-1.51352	0.0470085	0.0598514	1	58	tags=6%, list=0%, signal=6%
1578	GU_PDEF_TARGETS_UP	GU_PDEF_TARGETS_UP		53	-0.447009	-1.51352	0.0259481	0.0598732	1	2169	tags=26%, list=15%, signal=31%
1579	GO_PEPTIDYL_TYROSINE_MODIFICATION	GO_PEPTIDYL_TYROSINE_MODIFICATION		118	-0.389045	-1.51318	0.0111732	0.0599844	1	1418	tags=21%, list=10%, signal=23%
1580	KEGG_P53_SIGNALING_PATHWAY	KEGG_P53_SIGNALING_PATHWAY		60	-0.43625	-1.51282	0.0131827	0.0600968	1	1180	tags=22%, list=8%, signal=24%
1581	GO_REGULATION_OF_RNA_STABILITY	GO_REGULATION_OF_RNA_STABILITY		119	-0.392726	-1.51239	0.00544465	0.060268	1	2141	tags=23%, list=15%, signal=26%
1582	REACTOME_GPCR_DOWNSTREAM_SIGNALING	REACTOME_GPCR_DOWNSTREAM_SIGNALING		239	-0.358791	-1.51239	0.00178571	0.060289	1	1824	tags=21%, list=13%, signal=24%
1583	RASHI_RESPONSE_TO_IONIZING_RADIATION_6	RASHI_RESPONSE_TO_IONIZING_RADIATION_6		67	-0.432363	-1.51222	0.0131579	0.0603384	1	1078	tags=18%, list=8%, signal=19%
1584	CHR9Q31	CHR9Q31		27	-0.508835	-1.51121	0.0439331	0.0606971	1	2081	tags=33%, list=15%, signal=39%
1585	GO_REGULATION_OF_CELL_GROWTH	GO_REGULATION_OF_CELL_GROWTH		266	-0.352901	-1.51077	0	0.0608644	1	2080	tags=23%, list=15%, signal=26%
1586	REACTOME_PEPTIDE_CHAIN_ELONGATION	REACTOME_PEPTIDE_CHAIN_ELONGATION		76	-0.424796	-1.51027	0.0205607	0.0610202	1	8196	tags=100%, list=58%, signal=235%
1587	GO_POSITIVE_REGULATION_OF_CELL_PROJECTION_ORGANIZATION	GO_POSITIVE_REGULATION_OF_CELL_PROJECTION_ORGANIZATION		194	-0.368789	-1.5099	0.00184162	0.0611863	1	1393	tags=17%, list=10%, signal=19%
1588	DORSAM_HOXA9_TARGETS_DN	DORSAM_HOXA9_TARGETS_DN		27	-0.526869	-1.50977	0.0459082	0.0612044	1	1612	tags=33%, list=11%, signal=38%
1589	REACTOME_AUTODEGRADATION_OF_CDH1_BY_CDH1_APC_C	REACTOME_AUTODEGRADATION_OF_CDH1_BY_CDH1_APC_C		54	-0.452321	-1.50972	0.0204842	0.061209	1	2108	tags=28%, list=15%, signal=32%
1590	PID_ATF2_PATHWAY	PID_ATF2_PATHWAY		48	-0.470892	-1.50965	0.0308642	0.0612215	1	1387	tags=29%, list=10%, signal=32%
1591	PEDERSEN_METASTASIS_BY_ERBB2_ISOFORM_6	PEDERSEN_METASTASIS_BY_ERBB2_ISOFORM_6		18	-0.576089	-1.50919	0.0451866	0.0613827	1	2044	tags=44%, list=14%, signal=52%
1592	NAKAMURA_TUMOR_ZONE_PERIPHERAL_VS_CENTRAL_DN	NAKAMURA_TUMOR_ZONE_PERIPHERAL_VS_CENTRAL_DN		450	-0.336381	-1.50922	0	0.0613927	1	1835	tags=20%, list=13%, signal=22%
1593	CHR10Q25	CHR10Q25		31	-0.494643	-1.50926	0.0431211	0.061398	1	482	tags=13%, list=3%, signal=13%
1594	GO_POSITIVE_REGULATION_OF_OXIDOREDUCTASE_ACTIVITY	GO_POSITIVE_REGULATION_OF_OXIDOREDUCTASE_ACTIVITY		30	-0.503905	-1.50907	0.0315126	0.061401	1	1281	tags=23%, list=9%, signal=26%
1595	GNF2_IL2RB	GNF2_IL2RB		26	-0.527777	-1.50909	0.0465587	0.0614129	1	1233	tags=35%, list=9%, signal=38%
1596	REACTOME_NUCLEAR_SIGNALING_BY_ERBB4	REACTOME_NUCLEAR_SIGNALING_BY_ERBB4		27	-0.511387	-1.50815	0.0480167	0.0618076	1	1540	tags=30%, list=11%, signal=33%
1597	GO_ENDOCARDIAL_CUSHION_DEVELOPMENT	GO_ENDOCARDIAL_CUSHION_DEVELOPMENT		24	-0.525772	-1.508	0.0427699	0.0618647	1	2422	tags=38%, list=17%, signal=45%
1598	GO_MEMBRANE_PROTEIN_PROTEOLYSIS	GO_MEMBRANE_PROTEIN_PROTEOLYSIS		28	-0.512663	-1.50786	0.0268595	0.0618868	1	2039	tags=25%, list=14%, signal=29%
1599	GO_REGULATION_OF_PHOSPHOPROTEIN_PHOSPHATASE_ACTIVITY	GO_REGULATION_OF_PHOSPHOPROTEIN_PHOSPHATASE_ACTIVITY		44	-0.469609	-1.50764	0.040404	0.0619547	1	1304	tags=20%, list=9%, signal=22%
1600	GO_REGULATION_OF_BINDING	GO_REGULATION_OF_BINDING		217	-0.361126	-1.50766	0.0017762	0.0619654	1	1089	tags=15%, list=8%, signal=16%
1601	GO_SOMITOGENESIS	GO_SOMITOGENESIS		33	-0.500649	-1.50723	0.0246914	0.0620715	1	1311	tags=27%, list=9%, signal=30%
1602	GO_MYELOID_CELL_ACTIVATION_INVOLVED_IN_IMMUNE_RESPONSE	GO_MYELOID_CELL_ACTIVATION_INVOLVED_IN_IMMUNE_RESPONSE		27	-0.512527	-1.50578	0.0451613	0.062688	1	634	tags=22%, list=4%, signal=23%
1603	REACTOME_CDT1_ASSOCIATION_WITH_THE_CDC6_ORC_ORIGIN_COMPLEX	REACTOME_CDT1_ASSOCIATION_WITH_THE_CDC6_ORC_ORIGIN_COMPLEX		46	-0.461167	-1.50554	0.035124	0.0627579	1	2108	tags=26%, list=15%, signal=31%
1604	GO_REGULATION_OF_HORMONE_SECRETION	GO_REGULATION_OF_HORMONE_SECRETION		148	-0.377621	-1.50537	0.00961539	0.0628166	1	1847	tags=22%, list=13%, signal=25%
1605	BROWNE_HCMV_INFECTION_14HR_UP	BROWNE_HCMV_INFECTION_14HR_UP		126	-0.38763	-1.50525	0.00874126	0.062833	1	1583	tags=25%, list=11%, signal=27%
1606	GO_REGULATION_OF_SYSTEM_PROCESS	GO_REGULATION_OF_SYSTEM_PROCESS		281	-0.352915	-1.5052	0	0.0628342	1	1545	tags=17%, list=11%, signal=19%
1607	WANG_RESPONSE_TO_BEXAROTENE_DN	WANG_RESPONSE_TO_BEXAROTENE_DN		24	-0.536609	-1.50503	0.0487288	0.0628952	1	917	tags=25%, list=6%, signal=27%
1608	GO_CELL_JUNCTION_ORGANIZATION	GO_CELL_JUNCTION_ORGANIZATION		115	-0.394158	-1.50463	0.00894454	0.0629884	1	2216	tags=23%, list=16%, signal=28%
1609	PID_P73PATHWAY	PID_P73PATHWAY		63	-0.428286	-1.50463	0.0211132	0.0630095	1	1358	tags=22%, list=10%, signal=24%
1610	FARMER_BREAST_CANCER_BASAL_VS_LULMINAL	FARMER_BREAST_CANCER_BASAL_VS_LULMINAL		251	-0.357089	-1.50352	0	0.0635012	1	1313	tags=16%, list=9%, signal=18%
1611	GO_MAMMARY_GLAND_MORPHOGENESIS	GO_MAMMARY_GLAND_MORPHOGENESIS		22	-0.544569	-1.5031	0.040404	0.0636875	1	166	tags=14%, list=1%, signal=14%
1612	WARTERS_IR_RESPONSE_5GY	WARTERS_IR_RESPONSE_5GY		31	-0.501747	-1.50302	0.0409836	0.0636966	1	1616	tags=29%, list=11%, signal=33%
1613	KANG_DOXORUBICIN_RESISTANCE_DN	KANG_DOXORUBICIN_RESISTANCE_DN		17	-0.580228	-1.50292	0.0501044	0.0637353	1	912	tags=35%, list=6%, signal=38%
1614	GENTILE_UV_HIGH_DOSE_DN	GENTILE_UV_HIGH_DOSE_DN		262	-0.352902	-1.50237	0	0.0639048	1	1929	tags=26%, list=14%, signal=29%
1615	TAKEDA_TARGETS_OF_NUP98_HOXA9_FUSION_10D_DN	TAKEDA_TARGETS_OF_NUP98_HOXA9_FUSION_10D_DN		108	-0.391183	-1.50198	0.00904159	0.0640699	1	687	tags=13%, list=5%, signal=14%
1616	CHR10P15	CHR10P15		29	-0.507485	-1.50183	0.0404858	0.0641245	1	1685	tags=24%, list=12%, signal=27%
1617	GO_REGULATION_OF_SMOOTH_MUSCLE_CELL_MIGRATION	GO_REGULATION_OF_SMOOTH_MUSCLE_CELL_MIGRATION		37	-0.477953	-1.50156	0.0333333	0.0641897	1	833	tags=22%, list=6%, signal=23%
1618	GO_REGULATION_OF_VIRAL_RELEASE_FROM_HOST_CELL	GO_REGULATION_OF_VIRAL_RELEASE_FROM_HOST_CELL		29	-0.509312	-1.50162	0.0403226	0.0642096	1	268	tags=17%, list=2%, signal=18%
1619	GO_CYCLIC_NUCLEOTIDE_METABOLIC_PROCESS	GO_CYCLIC_NUCLEOTIDE_METABOLIC_PROCESS		31	-0.500942	-1.50126	0.0254403	0.0643028	1	2146	tags=32%, list=15%, signal=38%
1620	GO_MUCOPOLYSACCHARIDE_METABOLIC_PROCESS	GO_MUCOPOLYSACCHARIDE_METABOLIC_PROCESS		72	-0.424064	-1.5011	0.00821355	0.0643438	1	2242	tags=28%, list=16%, signal=33%
1621	GO_POSITIVE_REGULATION_OF_B_CELL_MEDIATED_IMMUNITY	GO_POSITIVE_REGULATION_OF_B_CELL_MEDIATED_IMMUNITY		20	-0.558934	-1.5005	0.0489362	0.0646077	1	1380	tags=30%, list=10%, signal=33%
1622	HALLMARK_ANDROGEN_RESPONSE	HALLMARK_ANDROGEN_RESPONSE		85	-0.409184	-1.50027	0.0152091	0.0646753	1	3004	tags=40%, list=21%, signal=50%
1623	GO_REGULATION_OF_LIPID_STORAGE	GO_REGULATION_OF_LIPID_STORAGE		31	-0.499975	-1.49937	0.0506073	0.0650011	1	878	tags=23%, list=6%, signal=24%
1624	GO_RESPONSE_TO_WOUNDING	GO_RESPONSE_TO_WOUNDING		370	-0.340438	-1.49929	0	0.0650162	1	2012	tags=19%, list=14%, signal=22%
1625	REACTOME_INTEGRIN_CELL_SURFACE_INTERACTIONS	REACTOME_INTEGRIN_CELL_SURFACE_INTERACTIONS		60	-0.433525	-1.4992	0.0343434	0.0650283	1	879	tags=15%, list=6%, signal=16%
1626	ROY_WOUND_BLOOD_VESSEL_UP	ROY_WOUND_BLOOD_VESSEL_UP		35	-0.480244	-1.49907	0.0421687	0.0650437	1	1402	tags=26%, list=10%, signal=28%
1627	GO_SEGMENTATION	GO_SEGMENTATION		49	-0.446616	-1.49887	0.0177866	0.0650993	1	1311	tags=27%, list=9%, signal=29%
1628	GO_CELLULAR_RESPONSE_TO_DRUG	GO_CELLULAR_RESPONSE_TO_DRUG		43	-0.468753	-1.49822	0.0365385	0.0654183	1	1525	tags=28%, list=11%, signal=31%
1629	GO_PROTEIN_SECRETION	GO_PROTEIN_SECRETION		73	-0.417743	-1.49801	0.0169811	0.0654516	1	2858	tags=30%, list=20%, signal=38%
1630	HOFFMANN_LARGE_TO_SMALL_PRE_BII_LYMPHOCYTE_DN	HOFFMANN_LARGE_TO_SMALL_PRE_BII_LYMPHOCYTE_DN		53	-0.4465	-1.49771	0.0211132	0.065567	1	1058	tags=21%, list=7%, signal=22%
1631	GO_NEGATIVE_REGULATION_OF_PEPTIDYL_TYROSINE_PHOSPHORYLATION	GO_NEGATIVE_REGULATION_OF_PEPTIDYL_TYROSINE_PHOSPHORYLATION		32	-0.494142	-1.4974	0.0352941	0.0656962	1	1051	tags=19%, list=7%, signal=20%
1632	GO_SOMITE_DEVELOPMENT	GO_SOMITE_DEVELOPMENT		39	-0.469738	-1.49709	0.0269151	0.0658365	1	1311	tags=26%, list=9%, signal=28%
1633	GO_EXONUCLEASE_ACTIVITY	GO_EXONUCLEASE_ACTIVITY		58	-0.441972	-1.49691	0.0236686	0.0659158	1	224	tags=10%, list=2%, signal=10%
1634	GO_NEGATIVE_REGULATION_OF_CALCIUM_ION_TRANSPORT	GO_NEGATIVE_REGULATION_OF_CALCIUM_ION_TRANSPORT		29	-0.506225	-1.49638	0.0388548	0.0661605	1	1446	tags=21%, list=10%, signal=23%
1635	GO_CELL_CYCLE_ARREST	GO_CELL_CYCLE_ARREST		116	-0.390683	-1.49604	0.00970874	0.0662955	1	1426	tags=18%, list=10%, signal=20%
1636	GO_REGULATION_OF_OSTEOCLAST_DIFFERENTIATION	GO_REGULATION_OF_OSTEOCLAST_DIFFERENTIATION		43	-0.470333	-1.4957	0.0222672	0.0664416	1	1228	tags=30%, list=9%, signal=33%
1637	PID_ANGIOPOIETIN_RECEPTOR_PATHWAY	PID_ANGIOPOIETIN_RECEPTOR_PATHWAY		39	-0.472042	-1.49525	0.0491493	0.0665068	1	2231	tags=41%, list=16%, signal=49%
1638	GO_NEGATIVE_REGULATION_OF_COAGULATION	GO_NEGATIVE_REGULATION_OF_COAGULATION		29	-0.503018	-1.49536	0.0546559	0.066523	1	1051	tags=28%, list=7%, signal=30%
1639	GGCACAT_MIR455	GGCACAT_MIR455		36	-0.484056	-1.49526	0.0423729	0.0665291	1	1846	tags=33%, list=13%, signal=38%
1640	PEREZ_TP63_TARGETS	PEREZ_TP63_TARGETS		219	-0.360838	-1.49398	0	0.0670822	1	1624	tags=20%, list=11%, signal=22%
1641	GO_POSITIVE_REGULATION_OF_ORGAN_GROWTH	GO_POSITIVE_REGULATION_OF_ORGAN_GROWTH		22	-0.527772	-1.49389	0.0445344	0.067109	1	2422	tags=50%, list=17%, signal=60%
1642	GO_HYALURONAN_METABOLIC_PROCESS	GO_HYALURONAN_METABOLIC_PROCESS		21	-0.537168	-1.49377	0.0413223	0.0671562	1	847	tags=19%, list=6%, signal=20%
1643	GO_NEGATIVE_REGULATION_OF_CELL_MORPHOGENESIS_INVOLVED_IN_DIFFERENTIATION	GO_NEGATIVE_REGULATION_OF_CELL_MORPHOGENESIS_INVOLVED_IN_DIFFERENTIATION		76	-0.411249	-1.49369	0.0269231	0.0671725	1	2543	tags=28%, list=18%, signal=33%
1644	GO_REGULATION_OF_BMP_SIGNALING_PATHWAY	GO_REGULATION_OF_BMP_SIGNALING_PATHWAY		44	-0.465423	-1.49361	0.0341151	0.0671938	1	1933	tags=32%, list=14%, signal=37%
1645	KEGG_PRION_DISEASES	KEGG_PRION_DISEASES		27	-0.517346	-1.49341	0.0371901	0.0672791	1	1088	tags=26%, list=8%, signal=28%
1646	GO_REGULATION_OF_PROTEIN_SERINE_THREONINE_KINASE_ACTIVITY	GO_REGULATION_OF_PROTEIN_SERINE_THREONINE_KINASE_ACTIVITY		345	-0.341239	-1.49288	0	0.0675177	1	1565	tags=19%, list=11%, signal=20%
1647	DACOSTA_UV_RESPONSE_VIA_ERCC3_UP	DACOSTA_UV_RESPONSE_VIA_ERCC3_UP		264	-0.348322	-1.49272	0.00340715	0.0675754	1	1221	tags=15%, list=9%, signal=16%
1648	SHIPP_DLBCL_CURED_VS_FATAL_UP	SHIPP_DLBCL_CURED_VS_FATAL_UP		21	-0.540643	-1.49238	0.0536481	0.067737	1	2264	tags=48%, list=16%, signal=57%
1649	YAO_TEMPORAL_RESPONSE_TO_PROGESTERONE_CLUSTER_6	YAO_TEMPORAL_RESPONSE_TO_PROGESTERONE_CLUSTER_6		46	-0.460174	-1.49119	0.0282258	0.068253	1	1244	tags=20%, list=9%, signal=21%
1650	REACTOME_ANTIGEN_PROCESSING_UBIQUITINATION_PROTEASOME_DEGRADATION	REACTOME_ANTIGEN_PROCESSING_UBIQUITINATION_PROTEASOME_DEGRADATION		167	-0.367912	-1.49092	0.00580271	0.0683169	1	2381	tags=26%, list=17%, signal=31%
1651	GO_REGULATION_OF_MEMBRANE_DEPOLARIZATION	GO_REGULATION_OF_MEMBRANE_DEPOLARIZATION		30	-0.497387	-1.49044	0.0433925	0.0685201	1	1964	tags=37%, list=14%, signal=42%
1652	GO_EMBRYONIC_DIGESTIVE_TRACT_DEVELOPMENT	GO_EMBRYONIC_DIGESTIVE_TRACT_DEVELOPMENT		19	-0.560841	-1.49014	0.0413223	0.0685446	1	1833	tags=37%, list=13%, signal=42%
1653	GAVIN_FOXP3_TARGETS_CLUSTER_P3	GAVIN_FOXP3_TARGETS_CLUSTER_P3		118	-0.38896	-1.49031	0.0112994	0.0685493	1	1440	tags=23%, list=10%, signal=25%
1654	AMUNDSON_RESPONSE_TO_ARSENITE	AMUNDSON_RESPONSE_TO_ARSENITE		181	-0.364562	-1.49015	0.00555556	0.0685602	1	892	tags=14%, list=6%, signal=15%
1655	PID_DELTA_NP63_PATHWAY	PID_DELTA_NP63_PATHWAY		37	-0.477387	-1.49021	0.0420842	0.0685772	1	1396	tags=27%, list=10%, signal=30%
1656	LEF1_UP.V1_UP	LEF1_UP.V1_UP		123	-0.380286	-1.49015	0.00884956	0.0685835	1	1417	tags=19%, list=10%, signal=21%
1657	GO_NEGATIVE_REGULATION_OF_B_CELL_ACTIVATION	GO_NEGATIVE_REGULATION_OF_B_CELL_ACTIVATION		27	-0.526349	-1.48968	0.0524194	0.0687564	1	1127	tags=30%, list=8%, signal=32%
1658	CHR20Q12	CHR20Q12		20	-0.54708	-1.48915	0.0527383	0.06903	1	166	tags=15%, list=1%, signal=15%
1659	SHIN_B_CELL_LYMPHOMA_CLUSTER_2	SHIN_B_CELL_LYMPHOMA_CLUSTER_2		27	-0.510784	-1.48904	0.040568	0.0690684	1	1528	tags=41%, list=11%, signal=46%
1660	SASSON_RESPONSE_TO_GONADOTROPHINS_DN	SASSON_RESPONSE_TO_GONADOTROPHINS_DN		73	-0.4206	-1.4889	0.0262172	0.0691308	1	1163	tags=21%, list=8%, signal=22%
1661	ONO_FOXP3_TARGETS_UP	ONO_FOXP3_TARGETS_UP		18	-0.56884	-1.48872	0.0409483	0.0692026	1	989	tags=44%, list=7%, signal=48%
1662	GO_POSITIVE_REGULATION_OF_MYELOID_CELL_DIFFERENTIATION	GO_POSITIVE_REGULATION_OF_MYELOID_CELL_DIFFERENTIATION		59	-0.433413	-1.48845	0.0213178	0.0692892	1	1396	tags=29%, list=10%, signal=32%
1663	BRACHAT_RESPONSE_TO_METHOTREXATE_DN	BRACHAT_RESPONSE_TO_METHOTREXATE_DN		24	-0.525242	-1.48848	0.0492813	0.0692961	1	525	tags=17%, list=4%, signal=17%
1664	STEARMAN_TUMOR_FIELD_EFFECT_UP	STEARMAN_TUMOR_FIELD_EFFECT_UP		33	-0.493316	-1.48839	0.0466019	0.069306	1	1586	tags=21%, list=11%, signal=24%
1665	CHR11Q21	CHR11Q21		18	-0.566457	-1.48809	0.0541082	0.0694446	1	841	tags=22%, list=6%, signal=24%
1666	GO_NEGATIVE_REGULATION_OF_BINDING	GO_NEGATIVE_REGULATION_OF_BINDING		100	-0.396697	-1.48804	0.0148423	0.0694461	1	1089	tags=16%, list=8%, signal=17%
1667	PETROVA_ENDOTHELIUM_LYMPHATIC_VS_BLOOD_UP	PETROVA_ENDOTHELIUM_LYMPHATIC_VS_BLOOD_UP		101	-0.398034	-1.48796	0.019305	0.0694619	1	2170	tags=24%, list=15%, signal=28%
1668	AGGAAGC_MIR5163P	AGGAAGC_MIR5163P		80	-0.415468	-1.48781	0.0223048	0.0695169	1	1101	tags=16%, list=8%, signal=18%
1669	PID_PDGFRB_PATHWAY	PID_PDGFRB_PATHWAY		120	-0.389375	-1.48751	0.00760456	0.0696419	1	1312	tags=21%, list=9%, signal=23%
1670	WILSON_PROTEASES_AT_TUMOR_BONE_INTERFACE_UP	WILSON_PROTEASES_AT_TUMOR_BONE_INTERFACE_UP		18	-0.569532	-1.48725	0.0561122	0.0697112	1	2342	tags=39%, list=17%, signal=47%
1671	OUELLET_OVARIAN_CANCER_INVASIVE_VS_LMP_UP	OUELLET_OVARIAN_CANCER_INVASIVE_VS_LMP_UP		105	-0.390509	-1.48701	0.00720721	0.0698166	1	1218	tags=10%, list=9%, signal=11%
1672	LEI_HOXC8_TARGETS_DN	LEI_HOXC8_TARGETS_DN		15	-0.599591	-1.4868	0.0545073	0.0698926	1	368	tags=20%, list=3%, signal=21%
1673	RICKMAN_TUMOR_DIFFERENTIATED_WELL_VS_POORLY_DN	RICKMAN_TUMOR_DIFFERENTIATED_WELL_VS_POORLY_DN		263	-0.350713	-1.4866	0.00337268	0.0699872	1	1921	tags=22%, list=14%, signal=25%
1674	GO_NEGATIVE_REGULATION_OF_PRODUCTION_OF_MOLECULAR_MEDIATOR_OF_IMMUNE_RESPONSE	GO_NEGATIVE_REGULATION_OF_PRODUCTION_OF_MOLECULAR_MEDIATOR_OF_IMMUNE_RESPONSE		20	-0.547233	-1.48627	0.0287611	0.0701516	1	1514	tags=30%, list=11%, signal=34%
1675	BRUINS_UVC_RESPONSE_VIA_TP53_GROUP_D	BRUINS_UVC_RESPONSE_VIA_TP53_GROUP_D		168	-0.365789	-1.48602	0.00366972	0.0702465	1	2024	tags=26%, list=14%, signal=29%
1676	AMIT_EGF_RESPONSE_60_MCF10A	AMIT_EGF_RESPONSE_60_MCF10A		35	-0.477112	-1.48534	0.0362903	0.0705202	1	1387	tags=40%, list=10%, signal=44%
1677	VANASSE_BCL2_TARGETS_UP	VANASSE_BCL2_TARGETS_UP		25	-0.515049	-1.48517	0.0410678	0.0705994	1	1450	tags=32%, list=10%, signal=36%
1678	GO_NEGATIVE_REGULATION_OF_INTRACELLULAR_PROTEIN_TRANSPORT	GO_NEGATIVE_REGULATION_OF_INTRACELLULAR_PROTEIN_TRANSPORT		74	-0.418404	-1.48483	0.0220588	0.0707578	1	2077	tags=30%, list=15%, signal=35%
1679	GO_ESTABLISHMENT_OR_MAINTENANCE_OF_BIPOLAR_CELL_POLARITY	GO_ESTABLISHMENT_OR_MAINTENANCE_OF_BIPOLAR_CELL_POLARITY		26	-0.510728	-1.4847	0.0462428	0.0708005	1	834	tags=19%, list=6%, signal=20%
1680	GO_MHC_PROTEIN_BINDING	GO_MHC_PROTEIN_BINDING		23	-0.530949	-1.48411	0.0631579	0.0710683	1	2546	tags=43%, list=18%, signal=53%
1681	TONKS_TARGETS_OF_RUNX1_RUNX1T1_FUSION_GRANULOCYTE_UP	TONKS_TARGETS_OF_RUNX1_RUNX1T1_FUSION_GRANULOCYTE_UP		42	-0.470378	-1.48377	0.0311891	0.0712095	1	1248	tags=26%, list=9%, signal=29%
1682	GO_CELLULAR_RESPONSE_TO_TOXIC_SUBSTANCE	GO_CELLULAR_RESPONSE_TO_TOXIC_SUBSTANCE		17	-0.564053	-1.48363	0.0818965	0.0712653	1	1426	tags=41%, list=10%, signal=46%
1683	YIH_RESPONSE_TO_ARSENITE_C4	YIH_RESPONSE_TO_ARSENITE_C4		15	-0.579133	-1.48339	0.0615385	0.0713678	1	1439	tags=40%, list=10%, signal=44%
1684	GO_REGULATION_OF_ALTERNATIVE_MRNA_SPLICING_VIA_SPLICEOSOME	GO_REGULATION_OF_ALTERNATIVE_MRNA_SPLICING_VIA_SPLICEOSOME		19	-0.567855	-1.48333	0.0601202	0.0713788	1	2836	tags=58%, list=20%, signal=72%
1685	GO_SIGNALING_RECEPTOR_ACTIVITY	GO_SIGNALING_RECEPTOR_ACTIVITY		482	-0.329069	-1.48283	0	0.0716499	1	1391	tags=16%, list=10%, signal=17%
1686	KEGG_ACUTE_MYELOID_LEUKEMIA	KEGG_ACUTE_MYELOID_LEUKEMIA		52	-0.44117	-1.48273	0.0432331	0.0716873	1	1515	tags=27%, list=11%, signal=30%
1687	ZHENG_FOXP3_TARGETS_IN_T_LYMPHOCYTE_DN	ZHENG_FOXP3_TARGETS_IN_T_LYMPHOCYTE_DN		30	-0.491694	-1.48215	0.0410156	0.071952	1	1099	tags=30%, list=8%, signal=32%
1688	CHIARADONNA_NEOPLASTIC_TRANSFORMATION_KRAS_UP	CHIARADONNA_NEOPLASTIC_TRANSFORMATION_KRAS_UP		104	-0.391868	-1.48185	0.00742115	0.0720829	1	2296	tags=30%, list=16%, signal=35%
1689	MIKKELSEN_IPS_ICP_WITH_H3K27ME3	MIKKELSEN_IPS_ICP_WITH_H3K27ME3		17	-0.580312	-1.48174	0.0606695	0.0721192	1	1797	tags=35%, list=13%, signal=40%
1690	BIOCARTA_ATM_PATHWAY	BIOCARTA_ATM_PATHWAY		20	-0.543279	-1.48114	0.0473251	0.0723579	1	951	tags=30%, list=7%, signal=32%
1691	GO_B_CELL_PROLIFERATION	GO_B_CELL_PROLIFERATION		21	-0.531968	-1.48114	0.059867	0.0723803	1	1051	tags=29%, list=7%, signal=31%
1692	CAIRO_HEPATOBLASTOMA_CLASSES_DN	CAIRO_HEPATOBLASTOMA_CLASSES_DN		141	-0.377894	-1.48067	0.00582524	0.0724866	1	2037	tags=27%, list=14%, signal=31%
1693	KRAS.600.LUNG.BREAST_UP.V1_DN	KRAS.600.LUNG.BREAST_UP.V1_DN		140	-0.376533	-1.48071	0.00549451	0.0725098	1	1584	tags=19%, list=11%, signal=21%
1694	MARIADASON_RESPONSE_TO_CURCUMIN_SULINDAC_5	MARIADASON_RESPONSE_TO_CURCUMIN_SULINDAC_5		21	-0.541859	-1.48074	0.0531697	0.0725177	1	1962	tags=24%, list=14%, signal=28%
1695	REACTOME_NETRIN1_SIGNALING	REACTOME_NETRIN1_SIGNALING		23	-0.526791	-1.48031	0.0729167	0.0726426	1	1312	tags=26%, list=9%, signal=29%
1696	GO_POSITIVE_REGULATION_OF_SMOOTH_MUSCLE_CELL_MIGRATION	GO_POSITIVE_REGULATION_OF_SMOOTH_MUSCLE_CELL_MIGRATION		23	-0.528696	-1.4798	0.0537849	0.0728717	1	1559	tags=35%, list=11%, signal=39%
1697	ALCALAY_AML_BY_NPM1_LOCALIZATION_UP	ALCALAY_AML_BY_NPM1_LOCALIZATION_UP		107	-0.39318	-1.47983	0.0093633	0.0728798	1	1850	tags=24%, list=13%, signal=28%
1698	GO_POSITIVE_REGULATION_OF_HOMEOSTATIC_PROCESS	GO_POSITIVE_REGULATION_OF_HOMEOSTATIC_PROCESS		144	-0.376926	-1.47942	0.0106195	0.0730137	1	1078	tags=13%, list=8%, signal=13%
1699	TCGA_GLIOBLASTOMA_COPY_NUMBER_UP	TCGA_GLIOBLASTOMA_COPY_NUMBER_UP		55	-0.439785	-1.4793	0.027668	0.0730301	1	1068	tags=22%, list=8%, signal=24%
1700	LIM_MAMMARY_STEM_CELL_UP	LIM_MAMMARY_STEM_CELL_UP		295	-0.344162	-1.47925	0	0.0730334	1	1895	tags=23%, list=13%, signal=26%
1701	GO_POSITIVE_REGULATION_OF_FILOPODIUM_ASSEMBLY	GO_POSITIVE_REGULATION_OF_FILOPODIUM_ASSEMBLY		18	-0.568009	-1.47894	0.059448	0.073156	1	1365	tags=33%, list=10%, signal=37%
1702	MORI_PLASMA_CELL_DN	MORI_PLASMA_CELL_DN		26	-0.505312	-1.47872	0.043956	0.0732378	1	2515	tags=42%, list=18%, signal=51%
1703	IWANAGA_CARCINOGENESIS_BY_KRAS_PTEN_DN	IWANAGA_CARCINOGENESIS_BY_KRAS_PTEN_DN		229	-0.35094	-1.47755	0.00179211	0.073803	1	1691	tags=20%, list=12%, signal=22%
1704	GNF2_CD7	GNF2_CD7		28	-0.504265	-1.47668	0.0494845	0.07423	1	1466	tags=39%, list=10%, signal=44%
1705	FINAK_BREAST_CANCER_SDPP_SIGNATURE	FINAK_BREAST_CANCER_SDPP_SIGNATURE		16	-0.570665	-1.47653	0.0547368	0.0742564	1	2541	tags=44%, list=18%, signal=53%
1706	GO_REGULATION_OF_NUCLEOTIDE_METABOLIC_PROCESS	GO_REGULATION_OF_NUCLEOTIDE_METABOLIC_PROCESS		110	-0.394248	-1.47619	0.0112994	0.0743844	1	1536	tags=20%, list=11%, signal=22%
1707	HOXA9_DN.V1_UP	HOXA9_DN.V1_UP		163	-0.370544	-1.47623	0.0123675	0.0743884	1	1287	tags=17%, list=9%, signal=19%
1708	LABBE_WNT3A_TARGETS_UP	LABBE_WNT3A_TARGETS_UP		87	-0.404405	-1.47588	0.0174419	0.0745209	1	993	tags=16%, list=7%, signal=17%
1709	GO_REGULATION_OF_CALCIUM_ION_TRANSMEMBRANE_TRANSPORT	GO_REGULATION_OF_CALCIUM_ION_TRANSMEMBRANE_TRANSPORT		67	-0.418389	-1.47517	0.0238095	0.0748606	1	1545	tags=18%, list=11%, signal=20%
1710	TRACEY_RESISTANCE_TO_IFNA2_DN	TRACEY_RESISTANCE_TO_IFNA2_DN		27	-0.514205	-1.47517	0.0519751	0.0748822	1	411	tags=22%, list=3%, signal=23%
1711	CHR5Q22	CHR5Q22		15	-0.588217	-1.47505	0.0504202	0.0749015	1	220	tags=20%, list=2%, signal=20%
1712	KLEIN_PRIMARY_EFFUSION_LYMPHOMA_DN	KLEIN_PRIMARY_EFFUSION_LYMPHOMA_DN		48	-0.456175	-1.47492	0.0273438	0.0749559	1	663	tags=15%, list=5%, signal=15%
1713	REACTOME_APOPTOTIC_CLEAVAGE_OF_CELLULAR_PROTEINS	REACTOME_APOPTOTIC_CLEAVAGE_OF_CELLULAR_PROTEINS		29	-0.500531	-1.47483	0.0431211	0.0749716	1	1051	tags=21%, list=7%, signal=22%
1714	PID_GLYPICAN_1PATHWAY	PID_GLYPICAN_1PATHWAY		19	-0.549154	-1.47466	0.0534979	0.0750321	1	937	tags=21%, list=7%, signal=23%
1715	GO_POSITIVE_REGULATION_OF_VIRAL_GENOME_REPLICATION	GO_POSITIVE_REGULATION_OF_VIRAL_GENOME_REPLICATION		29	-0.495276	-1.47462	0.0580913	0.0750334	1	1673	tags=28%, list=12%, signal=31%
1716	POOLA_INVASIVE_BREAST_CANCER_DN	POOLA_INVASIVE_BREAST_CANCER_DN		81	-0.406694	-1.4745	0.0214425	0.0750513	1	981	tags=15%, list=7%, signal=16%
1717	GO_REGULATION_OF_BLOOD_CIRCULATION	GO_REGULATION_OF_BLOOD_CIRCULATION		157	-0.365548	-1.47437	0.00747664	0.07507	1	1824	tags=22%, list=13%, signal=25%
1718	VERHAAK_GLIOBLASTOMA_MESENCHYMAL	VERHAAK_GLIOBLASTOMA_MESENCHYMAL		191	-0.356319	-1.47287	0.00343053	0.0757986	1	2620	tags=28%, list=18%, signal=34%
1719	REACTOME_P53_INDEPENDENT_G1_S_DNA_DAMAGE_CHECKPOINT	REACTOME_P53_INDEPENDENT_G1_S_DNA_DAMAGE_CHECKPOINT		46	-0.457177	-1.47277	0.0320641	0.0758348	1	2108	tags=26%, list=15%, signal=31%
1720	GO_CAMP_METABOLIC_PROCESS	GO_CAMP_METABOLIC_PROCESS		18	-0.565544	-1.4724	0.0608696	0.0759629	1	386	tags=17%, list=3%, signal=17%
1721	REACTOME_CLASS_I_MHC_MEDIATED_ANTIGEN_PROCESSING_PRESENTATION	REACTOME_CLASS_I_MHC_MEDIATED_ANTIGEN_PROCESSING_PRESENTATION		199	-0.35855	-1.472	0.00521739	0.0761292	1	2514	tags=26%, list=18%, signal=31%
1722	GO_PHAGOCYTOSIS	GO_PHAGOCYTOSIS		133	-0.374969	-1.47176	0.0205993	0.0761929	1	1312	tags=17%, list=9%, signal=19%
1723	GO_MYOBLAST_DIFFERENTIATION	GO_MYOBLAST_DIFFERENTIATION		24	-0.516599	-1.47141	0.0548523	0.0763545	1	1833	tags=29%, list=13%, signal=33%
1724	HERNANDEZ_ABERRANT_MITOSIS_BY_DOCETACEL_2NM_DN	HERNANDEZ_ABERRANT_MITOSIS_BY_DOCETACEL_2NM_DN		20	-0.533545	-1.47061	0.0681818	0.0767646	1	752	tags=25%, list=5%, signal=26%
1725	GRAHAM_CML_QUIESCENT_VS_NORMAL_QUIESCENT_DN	GRAHAM_CML_QUIESCENT_VS_NORMAL_QUIESCENT_DN		36	-0.475683	-1.47037	0.0504032	0.0768828	1	1592	tags=19%, list=11%, signal=22%
1726	GO_VESICLE_LUMEN	GO_VESICLE_LUMEN		58	-0.429674	-1.46975	0.0417457	0.0771602	1	2358	tags=22%, list=17%, signal=27%
1727	BOYAULT_LIVER_CANCER_SUBCLASS_G1_DN	BOYAULT_LIVER_CANCER_SUBCLASS_G1_DN		34	-0.48066	-1.46975	0.0365112	0.0771841	1	1509	tags=26%, list=11%, signal=30%
1728	GO_POSITIVE_REGULATION_OF_CATABOLIC_PROCESS	GO_POSITIVE_REGULATION_OF_CATABOLIC_PROCESS		319	-0.337094	-1.46966	0.00171527	0.0771897	1	2170	tags=22%, list=15%, signal=26%
1729	SIG_IL4RECEPTOR_IN_B_LYPHOCYTES	SIG_IL4RECEPTOR_IN_B_LYPHOCYTES		27	-0.498301	-1.46957	0.0464646	0.0772174	1	1932	tags=30%, list=14%, signal=34%
1730	GO_OXIDOREDUCTASE_ACTIVITY_ACTING_ON_PAIRED_DONORS_WITH_INCORPORATION_OR_REDUCTION_OF_MOLECULAR_OXYGEN_NAD_P_H_AS_ONE_DONOR_AND_INCORPORATION_OF_ONE_ATOM_OF_OXYGEN	GO_OXIDOREDUCTASE_ACTIVITY_ACTING_ON_PAIRED_DONORS_WITH_INCORPORATION_OR_REDUCTION_OF_MOLECULAR_OXYGEN_NAD_P_H_AS_ONE_DONOR_AND_INCORPORATION_OF_ONE_ATOM_OF_OXYGEN		23	-0.510056	-1.46941	0.0536779	0.0772943	1	2655	tags=43%, list=19%, signal=53%
1731	ATTACAT_MIR3803P	ATTACAT_MIR3803P		74	-0.414007	-1.4692	0.0269231	0.0774	1	1789	tags=26%, list=13%, signal=29%
1732	FERRANDO_TAL1_NEIGHBORS	FERRANDO_TAL1_NEIGHBORS		16	-0.573804	-1.46907	0.058952	0.0774498	1	2482	tags=44%, list=17%, signal=53%
1733	LIU_CDX2_TARGETS_UP	LIU_CDX2_TARGETS_UP		20	-0.540649	-1.46853	0.059761	0.0776941	1	1502	tags=30%, list=11%, signal=34%
1734	PRC1_BMI_UP.V1_DN	PRC1_BMI_UP.V1_DN		86	-0.400686	-1.46824	0.0169811	0.0778358	1	1185	tags=20%, list=8%, signal=21%
1735	GO_POSITIVE_REGULATION_OF_PROTEIN_TYROSINE_KINASE_ACTIVITY	GO_POSITIVE_REGULATION_OF_PROTEIN_TYROSINE_KINASE_ACTIVITY		24	-0.524595	-1.4682	0.0494624	0.0778384	1	2316	tags=38%, list=16%, signal=45%
1736	GO_POSITIVE_REGULATION_OF_TRANSLATIONAL_INITIATION	GO_POSITIVE_REGULATION_OF_TRANSLATIONAL_INITIATION		20	-0.538219	-1.46767	0.042735	0.0780635	1	1561	tags=35%, list=11%, signal=39%
1737	MEIS1_01	MEIS1_01		147	-0.371671	-1.46769	0.00699301	0.0780781	1	1407	tags=20%, list=10%, signal=22%
1738	CAMP_UP.V1_UP	CAMP_UP.V1_UP		160	-0.362706	-1.46771	0.0107335	0.0780949	1	1480	tags=14%, list=10%, signal=16%
1739	BROWNE_HCMV_INFECTION_2HR_UP	BROWNE_HCMV_INFECTION_2HR_UP		25	-0.520767	-1.46746	0.059761	0.0781653	1	1170	tags=40%, list=8%, signal=44%
1740	BILANGES_RAPAMYCIN_SENSITIVE_GENES	BILANGES_RAPAMYCIN_SENSITIVE_GENES		29	-0.49235	-1.46633	0.0504202	0.0787945	1	1384	tags=21%, list=10%, signal=23%
1741	HALLMARK_NOTCH_SIGNALING	HALLMARK_NOTCH_SIGNALING		27	-0.504183	-1.46609	0.0533881	0.0788298	1	1812	tags=41%, list=13%, signal=47%
1742	REACTOME_COMPLEMENT_CASCADE	REACTOME_COMPLEMENT_CASCADE		15	-0.581083	-1.46611	0.0584551	0.0788434	1	62	tags=7%, list=0%, signal=7%
1743	GO_PEPTIDASE_ACTIVATOR_ACTIVITY_INVOLVED_IN_APOPTOTIC_PROCESS	GO_PEPTIDASE_ACTIVATOR_ACTIVITY_INVOLVED_IN_APOPTOTIC_PROCESS		18	-0.547886	-1.46613	0.0532787	0.0788578	1	1426	tags=28%, list=10%, signal=31%
1744	MCMURRAY_TP53_HRAS_COOPERATION_RESPONSE_UP	MCMURRAY_TP53_HRAS_COOPERATION_RESPONSE_UP		20	-0.538431	-1.4658	0.0647182	0.0789863	1	251	tags=15%, list=2%, signal=15%
1745	PID_TXA2PATHWAY	PID_TXA2PATHWAY		43	-0.45608	-1.46505	0.0498008	0.0794513	1	543	tags=16%, list=4%, signal=17%
1746	GO_REGULATION_OF_METAL_ION_TRANSPORT	GO_REGULATION_OF_METAL_ION_TRANSPORT		195	-0.356307	-1.4645	0.00533808	0.0797101	1	1454	tags=16%, list=10%, signal=17%
1747	MARTINEZ_RB1_TARGETS_DN	MARTINEZ_RB1_TARGETS_DN		358	-0.333834	-1.46399	0	0.0799639	1	2055	tags=18%, list=14%, signal=21%
1748	GO_COLUMNAR_CUBOIDAL_EPITHELIAL_CELL_DIFFERENTIATION	GO_COLUMNAR_CUBOIDAL_EPITHELIAL_CELL_DIFFERENTIATION		63	-0.420634	-1.46384	0.025641	0.0799721	1	1463	tags=21%, list=10%, signal=23%
1749	ALONSO_METASTASIS_DN	ALONSO_METASTASIS_DN		16	-0.57038	-1.46384	0.08742	0.0799975	1	1073	tags=31%, list=8%, signal=34%
1750	MEISSNER_BRAIN_HCP_WITH_H3K27ME3	MEISSNER_BRAIN_HCP_WITH_H3K27ME3		80	-0.402535	-1.46388	0.0208333	0.0800012	1	2938	tags=36%, list=21%, signal=45%
1751	REACTOME_CELL_JUNCTION_ORGANIZATION	REACTOME_CELL_JUNCTION_ORGANIZATION		39	-0.469679	-1.46288	0.0287356	0.0804878	1	1840	tags=28%, list=13%, signal=32%
1752	MARCHINI_TRABECTEDIN_RESISTANCE_UP	MARCHINI_TRABECTEDIN_RESISTANCE_UP		17	-0.559192	-1.46291	0.0675105	0.0804971	1	38	tags=12%, list=0%, signal=12%
1753	CHEN_LUNG_CANCER_SURVIVAL	CHEN_LUNG_CANCER_SURVIVAL		19	-0.542656	-1.46269	0.0630081	0.0805912	1	2152	tags=16%, list=15%, signal=19%
1754	SAKAI_CHRONIC_HEPATITIS_VS_LIVER_CANCER_DN	SAKAI_CHRONIC_HEPATITIS_VS_LIVER_CANCER_DN		23	-0.530664	-1.46264	0.0603622	0.0805978	1	1094	tags=30%, list=8%, signal=33%
1755	GO_DEVELOPMENT_OF_PRIMARY_SEXUAL_CHARACTERISTICS	GO_DEVELOPMENT_OF_PRIMARY_SEXUAL_CHARACTERISTICS		122	-0.377125	-1.4616	0.0226843	0.0811078	1	2256	tags=25%, list=16%, signal=30%
1756	GO_REPRODUCTIVE_SYSTEM_DEVELOPMENT	GO_REPRODUCTIVE_SYSTEM_DEVELOPMENT		263	-0.340958	-1.46145	0.00176678	0.081171	1	2270	tags=23%, list=16%, signal=27%
1757	GO_POSITIVE_REGULATION_OF_PROTEIN_KINASE_B_SIGNALING	GO_POSITIVE_REGULATION_OF_PROTEIN_KINASE_B_SIGNALING		54	-0.437185	-1.46133	0.0344828	0.0812118	1	878	tags=24%, list=6%, signal=26%
1758	PID_P38_ALPHA_BETA_PATHWAY	PID_P38_ALPHA_BETA_PATHWAY		25	-0.504838	-1.46115	0.0528541	0.0812922	1	1418	tags=32%, list=10%, signal=35%
1759	BYSTROEM_CORRELATED_WITH_IL5_DN	BYSTROEM_CORRELATED_WITH_IL5_DN		61	-0.420993	-1.46097	0.0191205	0.0813391	1	1135	tags=20%, list=8%, signal=21%
1760	MA_MYELOID_DIFFERENTIATION_DN	MA_MYELOID_DIFFERENTIATION_DN		35	-0.480246	-1.46098	0.0408998	0.0813568	1	2176	tags=43%, list=15%, signal=50%
1761	ZHENG_FOXP3_TARGETS_UP	ZHENG_FOXP3_TARGETS_UP		22	-0.51873	-1.46102	0.0850202	0.08136	1	1145	tags=27%, list=8%, signal=30%
1762	TBK1.DN.48HRS_DN	TBK1.DN.48HRS_DN		47	-0.445275	-1.4609	0.046	0.0813646	1	1556	tags=21%, list=11%, signal=24%
1763	GNF2_HLA-C	GNF2_HLA-C		44	-0.45505	-1.46065	0.0258449	0.0814872	1	769	tags=18%, list=5%, signal=19%
1764	KRAS.600_UP.V1_UP	KRAS.600_UP.V1_UP		151	-0.365032	-1.46048	0.0124777	0.0815635	1	1949	tags=24%, list=14%, signal=27%
1765	GO_POSITIVE_REGULATION_OF_CALCIUM_ION_TRANSPORT	GO_POSITIVE_REGULATION_OF_CALCIUM_ION_TRANSPORT		64	-0.419151	-1.46028	0.0295858	0.0816657	1	1446	tags=17%, list=10%, signal=19%
1766	BILBAN_B_CLL_LPL_UP	BILBAN_B_CLL_LPL_UP		56	-0.430536	-1.45999	0.0262172	0.0818039	1	737	tags=18%, list=5%, signal=19%
1767	FONTAINE_FOLLICULAR_THYROID_ADENOMA_DN	FONTAINE_FOLLICULAR_THYROID_ADENOMA_DN		53	-0.437666	-1.45985	0.0324427	0.081867	1	1088	tags=15%, list=8%, signal=16%
1768	VERRECCHIA_DELAYED_RESPONSE_TO_TGFB1	VERRECCHIA_DELAYED_RESPONSE_TO_TGFB1		29	-0.5051	-1.45832	0.0604839	0.0826922	1	982	tags=21%, list=7%, signal=22%
1769	AFFAR_YY1_TARGETS_UP	AFFAR_YY1_TARGETS_UP		142	-0.373031	-1.45707	0.0126126	0.0833345	1	1664	tags=18%, list=12%, signal=21%
1770	GARGALOVIC_RESPONSE_TO_OXIDIZED_PHOSPHOLIPIDS_BLACK_UP	GARGALOVIC_RESPONSE_TO_OXIDIZED_PHOSPHOLIPIDS_BLACK_UP		32	-0.483459	-1.4567	0.0321285	0.083484	1	1169	tags=28%, list=8%, signal=31%
1771	FARMER_BREAST_CANCER_APOCRINE_VS_LUMINAL	FARMER_BREAST_CANCER_APOCRINE_VS_LUMINAL		234	-0.344837	-1.45661	0.005386	0.0834997	1	1532	tags=17%, list=11%, signal=19%
1772	BROWN_MYELOID_CELL_DEVELOPMENT_UP	BROWN_MYELOID_CELL_DEVELOPMENT_UP		129	-0.374375	-1.45641	0.0189036	0.0835746	1	1922	tags=23%, list=14%, signal=27%
1773	KRAS.600_UP.V1_DN	KRAS.600_UP.V1_DN		133	-0.372313	-1.45642	0.00909091	0.0835954	1	1678	tags=17%, list=12%, signal=19%
1774	AMIT_EGF_RESPONSE_480_HELA	AMIT_EGF_RESPONSE_480_HELA		129	-0.369215	-1.45563	0.00539568	0.0840667	1	1445	tags=19%, list=10%, signal=21%
1775	GO_RESPONSE_TO_CADMIUM_ION	GO_RESPONSE_TO_CADMIUM_ION		32	-0.477965	-1.4552	0.072549	0.0843079	1	1537	tags=28%, list=11%, signal=31%
1776	GO_CELLULAR_HOMEOSTASIS	GO_CELLULAR_HOMEOSTASIS		422	-0.326049	-1.4552	0.00168634	0.0843301	1	2292	tags=22%, list=16%, signal=26%
1777	ROSS_AML_WITH_AML1_ETO_FUSION	ROSS_AML_WITH_AML1_ETO_FUSION		49	-0.439467	-1.45494	0.0389105	0.0844204	1	1974	tags=29%, list=14%, signal=33%
1778	GENTLES_LEUKEMIC_STEM_CELL_UP	GENTLES_LEUKEMIC_STEM_CELL_UP		18	-0.545335	-1.45476	0.0700637	0.0845208	1	1269	tags=39%, list=9%, signal=43%
1779	COULOUARN_TEMPORAL_TGFB1_SIGNATURE_UP	COULOUARN_TEMPORAL_TGFB1_SIGNATURE_UP		81	-0.399504	-1.4547	0.0282486	0.0845366	1	2114	tags=30%, list=15%, signal=35%
1780	ZHOU_TNF_SIGNALING_30MIN	ZHOU_TNF_SIGNALING_30MIN		42	-0.459826	-1.45441	0.0380228	0.0846941	1	631	tags=14%, list=4%, signal=15%
1781	GO_ANTIMICROBIAL_HUMORAL_RESPONSE	GO_ANTIMICROBIAL_HUMORAL_RESPONSE		25	-0.497372	-1.45401	0.0682819	0.0849335	1	4072	tags=48%, list=29%, signal=67%
1782	PID_TOLL_ENDOGENOUS_PATHWAY	PID_TOLL_ENDOGENOUS_PATHWAY		21	-0.527451	-1.45337	0.0712743	0.0852066	1	634	tags=19%, list=4%, signal=20%
1783	IKEDA_MIR133_TARGETS_UP	IKEDA_MIR133_TARGETS_UP		42	-0.454745	-1.45337	0.0491803	0.0852315	1	780	tags=17%, list=5%, signal=18%
1784	PID_INTEGRIN_A4B1_PATHWAY	PID_INTEGRIN_A4B1_PATHWAY		30	-0.48746	-1.45279	0.0618337	0.0854778	1	861	tags=23%, list=6%, signal=25%
1785	GO_REGULATION_OF_CELLULAR_AMINE_METABOLIC_PROCESS	GO_REGULATION_OF_CELLULAR_AMINE_METABOLIC_PROCESS		68	-0.409853	-1.45247	0.0429688	0.0856656	1	2365	tags=28%, list=17%, signal=33%
1786	CDC5_01	CDC5_01		158	-0.35829	-1.45186	0.0146789	0.0858459	1	1840	tags=20%, list=13%, signal=23%
1787	AMIT_SERUM_RESPONSE_120_MCF10A	AMIT_SERUM_RESPONSE_120_MCF10A		52	-0.436445	-1.45189	0.0409683	0.0858547	1	1108	tags=27%, list=8%, signal=29%
1788	KEGG_T_CELL_RECEPTOR_SIGNALING_PATHWAY	KEGG_T_CELL_RECEPTOR_SIGNALING_PATHWAY		88	-0.391655	-1.45195	0.018315	0.0858669	1	1433	tags=25%, list=10%, signal=28%
1789	KHETCHOUMIAN_TRIM24_TARGETS_UP	KHETCHOUMIAN_TRIM24_TARGETS_UP		43	-0.454635	-1.45189	0.0324544	0.0858822	1	1387	tags=28%, list=10%, signal=31%
1790	BENPORATH_PRC2_TARGETS	BENPORATH_PRC2_TARGETS		254	-0.34359	-1.4517	0.00690846	0.0858891	1	2129	tags=23%, list=15%, signal=26%
1791	SWEET_LUNG_CANCER_KRAS_DN	SWEET_LUNG_CANCER_KRAS_DN		295	-0.340868	-1.45145	0.0017301	0.0860004	1	1303	tags=16%, list=9%, signal=17%
1792	VARELA_ZMPSTE24_TARGETS_DN	VARELA_ZMPSTE24_TARGETS_DN		25	-0.507582	-1.45065	0.0730223	0.0864319	1	881	tags=16%, list=6%, signal=17%
1793	GO_POSITIVE_REGULATION_OF_RESPONSE_TO_BIOTIC_STIMULUS	GO_POSITIVE_REGULATION_OF_RESPONSE_TO_BIOTIC_STIMULUS		26	-0.508803	-1.45044	0.0718447	0.0865299	1	1303	tags=31%, list=9%, signal=34%
1794	IKEDA_MIR30_TARGETS_UP	IKEDA_MIR30_TARGETS_UP		105	-0.381226	-1.44986	0.014652	0.0867951	1	1250	tags=19%, list=9%, signal=21%
1795	REACTOME_TOLL_RECEPTOR_CASCADES	REACTOME_TOLL_RECEPTOR_CASCADES		96	-0.387107	-1.44944	0.0176678	0.0869709	1	1600	tags=23%, list=11%, signal=26%
1796	GAUSSMANN_MLL_AF4_FUSION_TARGETS_E_DN	GAUSSMANN_MLL_AF4_FUSION_TARGETS_E_DN		17	-0.553247	-1.44939	0.069869	0.0869758	1	368	tags=18%, list=3%, signal=18%
1797	PHONG_TNF_RESPONSE_VIA_P38_COMPLETE	PHONG_TNF_RESPONSE_VIA_P38_COMPLETE		182	-0.356152	-1.449	0.012987	0.0871938	1	1364	tags=23%, list=10%, signal=25%
1798	PID_SYNDECAN_4_PATHWAY	PID_SYNDECAN_4_PATHWAY		26	-0.503633	-1.44876	0.0589474	0.0873221	1	1051	tags=19%, list=7%, signal=21%
1799	BOYLAN_MULTIPLE_MYELOMA_D_CLUSTER_DN	BOYLAN_MULTIPLE_MYELOMA_D_CLUSTER_DN		35	-0.47531	-1.4486	0.0455446	0.0873986	1	1447	tags=23%, list=10%, signal=25%
1800	GAUSSMANN_MLL_AF4_FUSION_TARGETS_A_DN	GAUSSMANN_MLL_AF4_FUSION_TARGETS_A_DN		50	-0.433653	-1.4481	0.0475285	0.0876825	1	1625	tags=24%, list=11%, signal=27%
1801	AMIT_EGF_RESPONSE_120_MCF10A	AMIT_EGF_RESPONSE_120_MCF10A		37	-0.47006	-1.44788	0.0371901	0.087769	1	959	tags=22%, list=7%, signal=23%
1802	GO_INTRINSIC_APOPTOTIC_SIGNALING_PATHWAY_BY_P53_CLASS_MEDIATOR	GO_INTRINSIC_APOPTOTIC_SIGNALING_PATHWAY_BY_P53_CLASS_MEDIATOR		39	-0.457792	-1.44779	0.0596154	0.0877983	1	1244	tags=21%, list=9%, signal=22%
1803	XU_GH1_AUTOCRINE_TARGETS_DN	XU_GH1_AUTOCRINE_TARGETS_DN		96	-0.385539	-1.44767	0.0183486	0.0878494	1	2943	tags=30%, list=21%, signal=38%
1804	GO_REGULATION_OF_AXON_GUIDANCE	GO_REGULATION_OF_AXON_GUIDANCE		24	-0.50063	-1.44682	0.0610526	0.0883707	1	2151	tags=33%, list=15%, signal=39%
1805	GO_POSITIVE_REGULATION_OF_COAGULATION	GO_POSITIVE_REGULATION_OF_COAGULATION		16	-0.564551	-1.44654	0.093617	0.088473	1	1697	tags=38%, list=12%, signal=43%
1806	BOYLAN_MULTIPLE_MYELOMA_C_CLUSTER_DN	BOYLAN_MULTIPLE_MYELOMA_C_CLUSTER_DN		27	-0.493687	-1.44655	0.0577689	0.0884961	1	1384	tags=41%, list=10%, signal=45%
1807	CHR7Q21	CHR7Q21		48	-0.44069	-1.44645	0.0321932	0.0885008	1	2653	tags=35%, list=19%, signal=43%
1808	IL21_UP.V1_UP	IL21_UP.V1_UP		98	-0.382542	-1.4462	0.014652	0.0885778	1	824	tags=12%, list=6%, signal=13%
1809	SOX9_B1	SOX9_B1		172	-0.356467	-1.44628	0.0165138	0.0885805	1	2392	tags=30%, list=17%, signal=35%
1810	GO_NEGATIVE_REGULATION_OF_VASCULATURE_DEVELOPMENT	GO_NEGATIVE_REGULATION_OF_VASCULATURE_DEVELOPMENT		46	-0.448966	-1.44589	0.055102	0.0887103	1	1564	tags=28%, list=11%, signal=32%
1811	GO_POSITIVE_REGULATION_OF_HORMONE_SECRETION	GO_POSITIVE_REGULATION_OF_HORMONE_SECRETION		64	-0.419245	-1.44591	0.0317757	0.0887235	1	2195	tags=28%, list=15%, signal=33%
1812	GO_NUCLEAR_LOCALIZATION_SEQUENCE_BINDING	GO_NUCLEAR_LOCALIZATION_SEQUENCE_BINDING		18	-0.546627	-1.44529	0.0702479	0.0890548	1	1523	tags=39%, list=11%, signal=44%
1813	ACAACCT_MIR453	ACAACCT_MIR453		27	-0.491381	-1.44484	0.0659794	0.0892901	1	1012	tags=30%, list=7%, signal=32%
1814	GO_REGULATION_OF_TRANSLATION_IN_RESPONSE_TO_STRESS	GO_REGULATION_OF_TRANSLATION_IN_RESPONSE_TO_STRESS		18	-0.539081	-1.4446	0.07173	0.0894381	1	2029	tags=44%, list=14%, signal=52%
1815	MIYAGAWA_TARGETS_OF_EWSR1_ETS_FUSIONS_UP	MIYAGAWA_TARGETS_OF_EWSR1_ETS_FUSIONS_UP		183	-0.354016	-1.44384	0.00915751	0.0899023	1	1474	tags=18%, list=10%, signal=20%
1816	GO_CELLULAR_RESPONSE_TO_ALCOHOL	GO_CELLULAR_RESPONSE_TO_ALCOHOL		77	-0.401785	-1.44358	0.019084	0.0899973	1	1248	tags=19%, list=9%, signal=21%
1817	STAT5A_03	STAT5A_03		155	-0.361718	-1.44365	0.00900901	0.0900106	1	1213	tags=17%, list=9%, signal=19%
1818	REACTOME_CELL_CELL_COMMUNICATION	REACTOME_CELL_CELL_COMMUNICATION		70	-0.404865	-1.44359	0.0217391	0.0900158	1	1840	tags=26%, list=13%, signal=29%
1819	MCGARVEY_SILENCED_BY_METHYLATION_IN_COLON_CANCER	MCGARVEY_SILENCED_BY_METHYLATION_IN_COLON_CANCER		21	-0.525621	-1.44352	0.0606061	0.0900208	1	2943	tags=48%, list=21%, signal=60%
1820	KEGG_PROSTATE_CANCER	KEGG_PROSTATE_CANCER		79	-0.404698	-1.44327	0.0242537	0.0901733	1	1146	tags=18%, list=8%, signal=19%
1821	GO_POSITIVE_REGULATION_OF_BLOOD_CIRCULATION	GO_POSITIVE_REGULATION_OF_BLOOD_CIRCULATION		41	-0.45478	-1.44272	0.0471311	0.0905061	1	945	tags=17%, list=7%, signal=18%
1822	GO_NEGATIVE_REGULATION_OF_MUSCLE_CELL_APOPTOTIC_PROCESS	GO_NEGATIVE_REGULATION_OF_MUSCLE_CELL_APOPTOTIC_PROCESS		19	-0.546635	-1.44258	0.0726141	0.0905756	1	1514	tags=26%, list=11%, signal=29%
1823	POU3F2_01	POU3F2_01		57	-0.423169	-1.44251	0.040146	0.0905965	1	1307	tags=19%, list=9%, signal=21%
1824	REACTOME_CD28_DEPENDENT_PI3K_AKT_SIGNALING	REACTOME_CD28_DEPENDENT_PI3K_AKT_SIGNALING		19	-0.53554	-1.442	0.0931174	0.0908841	1	1000	tags=21%, list=7%, signal=23%
1825	GO_REGULATION_OF_ORGAN_MORPHOGENESIS	GO_REGULATION_OF_ORGAN_MORPHOGENESIS		168	-0.356258	-1.44177	0.0110092	0.0910108	1	1088	tags=15%, list=8%, signal=17%
1826	P53_02	P53_02		158	-0.35736	-1.44105	0.00868056	0.0913375	1	1704	tags=21%, list=12%, signal=23%
1827	ATF2_S_UP.V1_UP	ATF2_S_UP.V1_UP		108	-0.381764	-1.44108	0.0232558	0.0913433	1	412	tags=9%, list=3%, signal=9%
1828	GO_NEGATIVE_REGULATION_OF_CELL_DEVELOPMENT	GO_NEGATIVE_REGULATION_OF_CELL_DEVELOPMENT		184	-0.354057	-1.44112	0.00759013	0.0913808	1	2422	tags=24%, list=17%, signal=29%
1829	CLASPER_LYMPHATIC_VESSELS_DURING_METASTASIS_DN	CLASPER_LYMPHATIC_VESSELS_DURING_METASTASIS_DN		21	-0.528888	-1.44115	0.0817204	0.0913846	1	1251	tags=19%, list=9%, signal=21%
1830	GO_REGULATION_OF_B_CELL_MEDIATED_IMMUNITY	GO_REGULATION_OF_B_CELL_MEDIATED_IMMUNITY		30	-0.492454	-1.44044	0.0513919	0.0916983	1	1380	tags=27%, list=10%, signal=29%
1831	GO_RESPONSE_TO_PAIN	GO_RESPONSE_TO_PAIN		15	-0.570689	-1.44013	0.0778947	0.0918303	1	790	tags=27%, list=6%, signal=28%
1832	GO_PROTEIN_K48_LINKED_UBIQUITINATION	GO_PROTEIN_K48_LINKED_UBIQUITINATION		42	-0.450749	-1.43995	0.0423077	0.0919023	1	3131	tags=43%, list=22%, signal=55%
1833	KRAS.300_UP.V1_UP	KRAS.300_UP.V1_UP		76	-0.402347	-1.43931	0.0358566	0.0922702	1	1949	tags=25%, list=14%, signal=29%
1834	BIOCARTA_NKT_PATHWAY	BIOCARTA_NKT_PATHWAY		20	-0.535643	-1.43895	0.0792683	0.0924643	1	1104	tags=35%, list=8%, signal=38%
1835	GO_COENZYME_BIOSYNTHETIC_PROCESS	GO_COENZYME_BIOSYNTHETIC_PROCESS		101	-0.378058	-1.43825	0.0209125	0.0928528	1	2005	tags=22%, list=14%, signal=25%
1836	GO_REGULATION_OF_BODY_FLUID_LEVELS	GO_REGULATION_OF_BODY_FLUID_LEVELS		314	-0.333518	-1.43828	0.00165017	0.0928817	1	1846	tags=18%, list=13%, signal=20%
1837	PAL_PRMT5_TARGETS_DN	PAL_PRMT5_TARGETS_DN		21	-0.532503	-1.43811	0.0681818	0.0929258	1	520	tags=24%, list=4%, signal=25%
1838	KONDO_EZH2_TARGETS	KONDO_EZH2_TARGETS		156	-0.35803	-1.43788	0.00902527	0.0929902	1	1338	tags=15%, list=9%, signal=17%
1839	HAN_SATB1_TARGETS_UP	HAN_SATB1_TARGETS_UP		272	-0.335661	-1.4377	0.00339559	0.0930574	1	1384	tags=15%, list=10%, signal=17%
1840	REACTOME_G_ALPHA_S_SIGNALLING_EVENTS	REACTOME_G_ALPHA_S_SIGNALLING_EVENTS		47	-0.439929	-1.43718	0.0309917	0.093379	1	1042	tags=17%, list=7%, signal=18%
1841	GO_ION_HOMEOSTASIS	GO_ION_HOMEOSTASIS		351	-0.329972	-1.43702	0	0.0934557	1	2275	tags=22%, list=16%, signal=26%
1842	GO_CELLULAR_RESPONSE_TO_ORGANIC_CYCLIC_COMPOUND	GO_CELLULAR_RESPONSE_TO_ORGANIC_CYCLIC_COMPOUND		313	-0.32675	-1.43682	0.00167224	0.0935399	1	1135	tags=15%, list=8%, signal=16%
1843	GO_SINGLE_STRANDED_RNA_BINDING	GO_SINGLE_STRANDED_RNA_BINDING		48	-0.430726	-1.43653	0.0533049	0.0936434	1	1615	tags=25%, list=11%, signal=28%
1844	HALLMARK_COAGULATION	HALLMARK_COAGULATION		94	-0.388694	-1.43627	0.0178218	0.0937955	1	2714	tags=28%, list=19%, signal=34%
1845	GO_POSITIVE_REGULATION_OF_OSSIFICATION	GO_POSITIVE_REGULATION_OF_OSSIFICATION		56	-0.428127	-1.43589	0.0366795	0.0940033	1	2220	tags=29%, list=16%, signal=34%
1846	GO_ACTIVATION_OF_PROTEIN_KINASE_ACTIVITY	GO_ACTIVATION_OF_PROTEIN_KINASE_ACTIVITY		199	-0.350124	-1.43574	0.00178571	0.0940888	1	1606	tags=18%, list=11%, signal=20%
1847	AMIT_SERUM_RESPONSE_60_MCF10A	AMIT_SERUM_RESPONSE_60_MCF10A		49	-0.43774	-1.43554	0.0475248	0.0942033	1	1061	tags=35%, list=7%, signal=37%
1848	GO_FEMALE_SEX_DIFFERENTIATION	GO_FEMALE_SEX_DIFFERENTIATION		67	-0.409239	-1.43529	0.0470588	0.0942411	1	1198	tags=19%, list=8%, signal=21%
1849	DOANE_RESPONSE_TO_ANDROGEN_DN	DOANE_RESPONSE_TO_ANDROGEN_DN		182	-0.348942	-1.43543	0.00902527	0.0942578	1	1573	tags=20%, list=11%, signal=23%
1850	GO_NEGATIVE_REGULATION_OF_CANONICAL_WNT_SIGNALING_PATHWAY	GO_NEGATIVE_REGULATION_OF_CANONICAL_WNT_SIGNALING_PATHWAY		116	-0.371952	-1.43534	0.0215054	0.0942657	1	2200	tags=27%, list=16%, signal=31%
1851	GO_REGULATION_OF_MYELOID_LEUKOCYTE_DIFFERENTIATION	GO_REGULATION_OF_MYELOID_LEUKOCYTE_DIFFERENTIATION		79	-0.398312	-1.43513	0.0320151	0.0943167	1	1228	tags=24%, list=9%, signal=26%
1852	CHR18Q12	CHR18Q12		25	-0.487999	-1.43464	0.0677291	0.0945824	1	2848	tags=40%, list=20%, signal=50%
1853	GO_ANTIGEN_BINDING	GO_ANTIGEN_BINDING		68	-0.408916	-1.43442	0.0354331	0.0947209	1	1483	tags=13%, list=10%, signal=15%
1854	PATTERSON_DOCETAXEL_RESISTANCE	PATTERSON_DOCETAXEL_RESISTANCE		25	-0.501687	-1.43321	0.0778689	0.0954196	1	3842	tags=56%, list=27%, signal=77%
1855	GO_EPITHELIAL_CELL_DIFFERENTIATION	GO_EPITHELIAL_CELL_DIFFERENTIATION		280	-0.334673	-1.43317	0.00681431	0.0954217	1	1868	tags=20%, list=13%, signal=23%
1856	NAKAYAMA_SOFT_TISSUE_TUMORS_PCA2_DN	NAKAYAMA_SOFT_TISSUE_TUMORS_PCA2_DN		44	-0.439845	-1.43305	0.0593047	0.0954788	1	2365	tags=32%, list=17%, signal=38%
1857	DORN_ADENOVIRUS_INFECTION_24HR_DN	DORN_ADENOVIRUS_INFECTION_24HR_DN		32	-0.479491	-1.43259	0.0543933	0.0957565	1	1781	tags=44%, list=13%, signal=50%
1858	GO_POSITIVE_REGULATION_OF_CELL_KILLING	GO_POSITIVE_REGULATION_OF_CELL_KILLING		28	-0.481993	-1.43212	0.0622318	0.0960013	1	2491	tags=43%, list=18%, signal=52%
1859	PPARA_01	PPARA_01		25	-0.488833	-1.43144	0.0843373	0.0963953	1	2065	tags=28%, list=15%, signal=33%
1860	GO_SECRETION	GO_SECRETION		363	-0.325546	-1.43121	0	0.0965384	1	1869	tags=17%, list=13%, signal=19%
1861	TGTATGA_MIR4853P	TGTATGA_MIR4853P		106	-0.378087	-1.43084	0.0152964	0.0967913	1	2501	tags=35%, list=18%, signal=42%
1862	GO_POSITIVE_REGULATION_OF_TOLL_LIKE_RECEPTOR_SIGNALING_PATHWAY	GO_POSITIVE_REGULATION_OF_TOLL_LIKE_RECEPTOR_SIGNALING_PATHWAY		15	-0.560941	-1.42986	0.0710901	0.0974137	1	732	tags=27%, list=5%, signal=28%
1863	ROSS_AML_WITH_PML_RARA_FUSION	ROSS_AML_WITH_PML_RARA_FUSION		56	-0.416649	-1.42955	0.0473373	0.0976097	1	2284	tags=30%, list=16%, signal=36%
1864	KEGG_NOTCH_SIGNALING_PATHWAY	KEGG_NOTCH_SIGNALING_PATHWAY		39	-0.458784	-1.42921	0.0534979	0.0977823	1	1540	tags=33%, list=11%, signal=37%
1865	GO_SULFUR_COMPOUND_BINDING	GO_SULFUR_COMPOUND_BINDING		134	-0.364693	-1.42833	0.0164534	0.0982681	1	3243	tags=28%, list=23%, signal=36%
1866	GO_MORPHOGENESIS_OF_A_BRANCHING_STRUCTURE	GO_MORPHOGENESIS_OF_A_BRANCHING_STRUCTURE		98	-0.380004	-1.42814	0.0143113	0.0983764	1	1691	tags=21%, list=12%, signal=24%
1867	GO_SPLEEN_DEVELOPMENT	GO_SPLEEN_DEVELOPMENT		25	-0.502082	-1.42775	0.0700637	0.0985755	1	1691	tags=32%, list=12%, signal=36%
1868	KEGG_FC_GAMMA_R_MEDIATED_PHAGOCYTOSIS	KEGG_FC_GAMMA_R_MEDIATED_PHAGOCYTOSIS		81	-0.401769	-1.42777	0.0237624	0.0986173	1	1312	tags=21%, list=9%, signal=23%
1869	HUANG_FOXA2_TARGETS_DN	HUANG_FOXA2_TARGETS_DN		30	-0.473064	-1.42761	0.055794	0.098655	1	879	tags=17%, list=6%, signal=18%
1870	PID_TCR_PATHWAY	PID_TCR_PATHWAY		58	-0.417712	-1.42629	0.0327869	0.0994371	1	3075	tags=40%, list=22%, signal=50%
1871	GNF2_PTPN4	GNF2_PTPN4		34	-0.469258	-1.42582	0.057377	0.0996549	1	1466	tags=35%, list=10%, signal=39%
1872	TOMIDA_METASTASIS_UP	TOMIDA_METASTASIS_UP		16	-0.557915	-1.42576	0.0524109	0.0996617	1	518	tags=13%, list=4%, signal=13%
1873	TCTGATC_MIR383	TCTGATC_MIR383		32	-0.463542	-1.42583	0.0502092	0.099681	1	1403	tags=19%, list=10%, signal=21%
1874	LEE_METASTASIS_AND_ALTERNATIVE_SPLICING_DN	LEE_METASTASIS_AND_ALTERNATIVE_SPLICING_DN		29	-0.472447	-1.42583	0.0689655	0.0997103	1	1412	tags=24%, list=10%, signal=27%
1875	GO_MALE_SEX_DIFFERENTIATION	GO_MALE_SEX_DIFFERENTIATION		90	-0.388564	-1.42566	0.0348162	0.0997155	1	2256	tags=26%, list=16%, signal=30%
1876	GO_MORPHOGENESIS_OF_AN_EPITHELIAL_SHEET	GO_MORPHOGENESIS_OF_AN_EPITHELIAL_SHEET		28	-0.496506	-1.42554	0.0570825	0.0997764	1	1777	tags=32%, list=13%, signal=37%
1877	GO_REGULATION_OF_FIBROBLAST_PROLIFERATION	GO_REGULATION_OF_FIBROBLAST_PROLIFERATION		61	-0.413106	-1.42522	0.0520231	0.0999753	1	1559	tags=25%, list=11%, signal=28%
1878	KYNG_DNA_DAMAGE_DN	KYNG_DNA_DAMAGE_DN		154	-0.361962	-1.42515	0.0180505	0.0999934	1	1648	tags=20%, list=12%, signal=23%
1879	KAMIKUBO_MYELOID_CEBPA_NETWORK	KAMIKUBO_MYELOID_CEBPA_NETWORK		21	-0.518482	-1.42492	0.0614754	0.100096	1	1454	tags=24%, list=10%, signal=26%
1880	NKX62_Q2	NKX62_Q2		134	-0.366758	-1.4248	0.0144144	0.100155	1	1610	tags=19%, list=11%, signal=22%
1881	GO_POSITIVE_REGULATION_OF_MESENCHYMAL_CELL_PROLIFERATION	GO_POSITIVE_REGULATION_OF_MESENCHYMAL_CELL_PROLIFERATION		17	-0.552544	-1.42444	0.0833333	0.100291	1	611	tags=29%, list=4%, signal=31%
1882	WEST_ADRENOCORTICAL_CARCINOMA_VS_ADENOMA_DN	WEST_ADRENOCORTICAL_CARCINOMA_VS_ADENOMA_DN		16	-0.552101	-1.42429	0.0840336	0.100341	1	2428	tags=50%, list=17%, signal=60%
1883	PID_RHOA_PATHWAY	PID_RHOA_PATHWAY		36	-0.46058	-1.42378	0.0576132	0.100659	1	1426	tags=25%, list=10%, signal=28%
1884	GO_NEGATIVE_REGULATION_OF_DEVELOPMENTAL_PROCESS	GO_NEGATIVE_REGULATION_OF_DEVELOPMENTAL_PROCESS		477	-0.318772	-1.42381	0.00334448	0.100674	1	2036	tags=22%, list=14%, signal=24%
1885	RICKMAN_HEAD_AND_NECK_CANCER_A	RICKMAN_HEAD_AND_NECK_CANCER_A		44	-0.439747	-1.42346	0.0510806	0.100874	1	1847	tags=27%, list=13%, signal=31%
1886	GO_DEAMINASE_ACTIVITY	GO_DEAMINASE_ACTIVITY		25	-0.487383	-1.42325	0.0542636	0.100997	1	1573	tags=28%, list=11%, signal=31%
1887	GO_CHONDROITIN_SULFATE_PROTEOGLYCAN_BIOSYNTHETIC_PROCESS	GO_CHONDROITIN_SULFATE_PROTEOGLYCAN_BIOSYNTHETIC_PROCESS		16	-0.556253	-1.42296	0.0901804	0.10108	1	2495	tags=44%, list=18%, signal=53%
1888	GO_NEGATIVE_REGULATION_OF_WNT_SIGNALING_PATHWAY	GO_NEGATIVE_REGULATION_OF_WNT_SIGNALING_PATHWAY		134	-0.3627	-1.42267	0.00720721	0.101101	1	2200	tags=25%, list=16%, signal=30%
1889	ST_GA12_PATHWAY	ST_GA12_PATHWAY		20	-0.522698	-1.42273	0.0786749	0.101114	1	1292	tags=25%, list=9%, signal=27%
1890	HELLER_HDAC_TARGETS_SILENCED_BY_METHYLATION_UP	HELLER_HDAC_TARGETS_SILENCED_BY_METHYLATION_UP		317	-0.328111	-1.42287	0	0.101115	1	1384	tags=16%, list=10%, signal=18%
1891	GO_NEURON_APOPTOTIC_PROCESS	GO_NEURON_APOPTOTIC_PROCESS		24	-0.509606	-1.42302	0.073501	0.101127	1	1293	tags=29%, list=9%, signal=32%
1892	STAT6_01	STAT6_01		158	-0.353211	-1.42249	0.00711744	0.10119	1	1266	tags=17%, list=9%, signal=19%
1893	GO_SECRETION_BY_CELL	GO_SECRETION_BY_CELL		301	-0.327099	-1.42242	0.00170068	0.101206	1	1090	tags=12%, list=8%, signal=12%
1894	MATSUDA_NATURAL_KILLER_DIFFERENTIATION	MATSUDA_NATURAL_KILLER_DIFFERENTIATION		363	-0.326006	-1.42226	0.00167504	0.101294	1	1147	tags=14%, list=8%, signal=15%
1895	GARGALOVIC_RESPONSE_TO_OXIDIZED_PHOSPHOLIPIDS_GREY_DN	GARGALOVIC_RESPONSE_TO_OXIDIZED_PHOSPHOLIPIDS_GREY_DN		45	-0.438389	-1.42177	0.0398323	0.101651	1	611	tags=18%, list=4%, signal=19%
1896	GO_CYTOKINE_BINDING	GO_CYTOKINE_BINDING		66	-0.404881	-1.42151	0.0474308	0.101685	1	2473	tags=29%, list=17%, signal=35%
1897	HEIDENBLAD_AMPLICON_12P11_12_UP	HEIDENBLAD_AMPLICON_12P11_12_UP		28	-0.492232	-1.42152	0.0766283	0.101707	1	2129	tags=32%, list=15%, signal=38%
1898	KOKKINAKIS_METHIONINE_DEPRIVATION_96HR_DN	KOKKINAKIS_METHIONINE_DEPRIVATION_96HR_DN		70	-0.404819	-1.42159	0.0353635	0.101713	1	422	tags=11%, list=3%, signal=12%
1899	KANNAN_TP53_TARGETS_UP	KANNAN_TP53_TARGETS_UP		44	-0.434159	-1.42162	0.0410678	0.101721	1	1249	tags=23%, list=9%, signal=25%
1900	REACTOME_ANTIGEN_PRESENTATION_FOLDING_ASSEMBLY_AND_PEPTIDE_LOADING_OF_CLASS_I_MHC	REACTOME_ANTIGEN_PRESENTATION_FOLDING_ASSEMBLY_AND_PEPTIDE_LOADING_OF_CLASS_I_MHC		18	-0.529765	-1.42153	0.0769231	0.101732	1	2477	tags=28%, list=17%, signal=34%
1901	GO_RESPONSE_TO_ANTIBIOTIC	GO_RESPONSE_TO_ANTIBIOTIC		38	-0.452317	-1.42085	0.07	0.102137	1	2368	tags=45%, list=17%, signal=54%
1902	TSENG_IRS1_TARGETS_UP	TSENG_IRS1_TARGETS_UP		86	-0.387348	-1.41963	0.0225141	0.102807	1	2228	tags=23%, list=16%, signal=27%
1903	KRAS.LUNG_UP.V1_DN	KRAS.LUNG_UP.V1_DN		55	-0.416999	-1.41907	0.0390625	0.103189	1	1418	tags=16%, list=10%, signal=18%
1904	MCDOWELL_ACUTE_LUNG_INJURY_DN	MCDOWELL_ACUTE_LUNG_INJURY_DN		32	-0.465629	-1.41888	0.0826446	0.103305	1	1189	tags=16%, list=8%, signal=17%
1905	SRC_UP.V1_UP	SRC_UP.V1_UP		76	-0.398625	-1.41864	0.0315582	0.103423	1	461	tags=11%, list=3%, signal=11%
1906	ST_MYOCYTE_AD_PATHWAY	ST_MYOCYTE_AD_PATHWAY		19	-0.528589	-1.41846	0.0672451	0.10349	1	917	tags=16%, list=6%, signal=17%
1907	GO_NEGATIVE_REGULATION_OF_CELL_JUNCTION_ASSEMBLY	GO_NEGATIVE_REGULATION_OF_CELL_JUNCTION_ASSEMBLY		18	-0.537836	-1.41839	0.0731183	0.103508	1	2430	tags=44%, list=17%, signal=54%
1908	GO_SIGNAL_TRANSDUCTION_BY_P53_CLASS_MEDIATOR	GO_SIGNAL_TRANSDUCTION_BY_P53_CLASS_MEDIATOR		101	-0.376915	-1.41834	0.0317164	0.103513	1	1566	tags=19%, list=11%, signal=21%
1909	BENPORATH_ES_WITH_H3K27ME3	BENPORATH_ES_WITH_H3K27ME3		484	-0.314312	-1.41799	0	0.103765	1	2129	tags=22%, list=15%, signal=25%
1910	WATTEL_AUTONOMOUS_THYROID_ADENOMA_DN	WATTEL_AUTONOMOUS_THYROID_ADENOMA_DN		34	-0.456682	-1.41765	0.0665281	0.103962	1	1387	tags=26%, list=10%, signal=29%
1911	TATTATA_MIR374	TATTATA_MIR374		192	-0.345467	-1.41727	0.0218579	0.104219	1	1867	tags=22%, list=13%, signal=25%
1912	GO_REGULATION_OF_PLASMA_LIPOPROTEIN_PARTICLE_LEVELS	GO_REGULATION_OF_PLASMA_LIPOPROTEIN_PARTICLE_LEVELS		30	-0.474773	-1.41597	0.0710059	0.105073	1	1824	tags=20%, list=13%, signal=23%
1913	GO_REGULATION_OF_ALCOHOL_BIOSYNTHETIC_PROCESS	GO_REGULATION_OF_ALCOHOL_BIOSYNTHETIC_PROCESS		26	-0.490852	-1.41602	0.0761099	0.10509	1	1697	tags=31%, list=12%, signal=35%
1914	SARTIPY_NORMAL_AT_INSULIN_RESISTANCE_UP	SARTIPY_NORMAL_AT_INSULIN_RESISTANCE_UP		29	-0.477702	-1.41608	0.0590631	0.105109	1	1801	tags=45%, list=13%, signal=51%
1915	RELA_DN.V1_UP	RELA_DN.V1_UP		90	-0.382352	-1.41541	0.0264151	0.105466	1	1480	tags=29%, list=10%, signal=32%
1916	BENPORATH_SUZ12_TARGETS	BENPORATH_SUZ12_TARGETS		469	-0.315064	-1.41542	0	0.105489	1	2299	tags=24%, list=16%, signal=28%
1917	BROWNE_HCMV_INFECTION_18HR_UP	BROWNE_HCMV_INFECTION_18HR_UP		140	-0.362054	-1.41432	0.0163043	0.106107	1	1383	tags=17%, list=10%, signal=19%
1918	KIM_WT1_TARGETS_8HR_UP	KIM_WT1_TARGETS_8HR_UP		134	-0.359662	-1.41435	0.019573	0.106114	1	1511	tags=22%, list=11%, signal=24%
1919	GO_REGULATION_OF_EPITHELIAL_CELL_PROLIFERATION	GO_REGULATION_OF_EPITHELIAL_CELL_PROLIFERATION		184	-0.346023	-1.41436	0.00739372	0.106143	1	1437	tags=19%, list=10%, signal=21%
1920	GO_NEGATIVE_REGULATION_OF_BMP_SIGNALING_PATHWAY	GO_NEGATIVE_REGULATION_OF_BMP_SIGNALING_PATHWAY		24	-0.511866	-1.41413	0.073922	0.106219	1	1933	tags=38%, list=14%, signal=43%
1921	AP1_Q4	AP1_Q4		182	-0.344664	-1.41404	0.00343643	0.106253	1	1652	tags=19%, list=12%, signal=21%
1922	WESTON_VEGFA_TARGETS_6HR	WESTON_VEGFA_TARGETS_6HR		33	-0.471097	-1.41392	0.0667976	0.10628	1	457	tags=15%, list=3%, signal=16%
1923	GO_NEGATIVE_REGULATION_OF_CELL_SUBSTRATE_ADHESION	GO_NEGATIVE_REGULATION_OF_CELL_SUBSTRATE_ADHESION		40	-0.437479	-1.41365	0.0605469	0.106436	1	2432	tags=35%, list=17%, signal=42%
1924	MORF_RBM8A	MORF_RBM8A		45	-0.437687	-1.41322	0.0493359	0.106752	1	2610	tags=33%, list=18%, signal=41%
1925	FOXO4_01	FOXO4_01		156	-0.355911	-1.41281	0.00531915	0.106979	1	1474	tags=18%, list=10%, signal=20%
1926	LUND_SILENCED_BY_METHYLATION	LUND_SILENCED_BY_METHYLATION		16	-0.544822	-1.4129	0.0778032	0.106981	1	2114	tags=44%, list=15%, signal=51%
1927	HANN_RESISTANCE_TO_BCL2_INHIBITOR_UP	HANN_RESISTANCE_TO_BCL2_INHIBITOR_UP		18	-0.535935	-1.41257	0.0940171	0.107131	1	1414	tags=28%, list=10%, signal=31%
1928	GO_POSITIVE_REGULATION_OF_AUTOPHAGY	GO_POSITIVE_REGULATION_OF_AUTOPHAGY		59	-0.418489	-1.41222	0.0488798	0.107323	1	2144	tags=29%, list=15%, signal=34%
1929	GEORGANTAS_HSC_MARKERS	GEORGANTAS_HSC_MARKERS		56	-0.424781	-1.41193	0.0469388	0.107528	1	1884	tags=27%, list=13%, signal=31%
1930	GO_REGULATION_OF_MYELOID_CELL_APOPTOTIC_PROCESS	GO_REGULATION_OF_MYELOID_CELL_APOPTOTIC_PROCESS		22	-0.508297	-1.41151	0.0823293	0.107772	1	1857	tags=32%, list=13%, signal=37%
1931	GO_CELLULAR_RESPONSE_TO_RETINOIC_ACID	GO_CELLULAR_RESPONSE_TO_RETINOIC_ACID		34	-0.463352	-1.41099	0.0711539	0.108081	1	2232	tags=29%, list=16%, signal=35%
1932	GO_REGULATION_OF_MORPHOGENESIS_OF_A_BRANCHING_STRUCTURE	GO_REGULATION_OF_MORPHOGENESIS_OF_A_BRANCHING_STRUCTURE		30	-0.473932	-1.41093	0.0757895	0.108106	1	878	tags=17%, list=6%, signal=18%
1933	CHYLA_CBFA2T3_TARGETS_UP	CHYLA_CBFA2T3_TARGETS_UP		259	-0.334389	-1.4108	0.00724638	0.108169	1	1315	tags=16%, list=9%, signal=18%
1934	ODONNELL_TFRC_TARGETS_UP	ODONNELL_TFRC_TARGETS_UP		274	-0.33303	-1.4107	0.00345423	0.108225	1	1508	tags=20%, list=11%, signal=22%
1935	STEGER_ADIPOGENESIS_UP	STEGER_ADIPOGENESIS_UP		17	-0.553464	-1.41058	0.0662526	0.108285	1	1038	tags=35%, list=7%, signal=38%
1936	GO_AMINOGLYCAN_METABOLIC_PROCESS	GO_AMINOGLYCAN_METABOLIC_PROCESS		111	-0.3729	-1.41017	0.0240741	0.108554	1	2242	tags=24%, list=16%, signal=29%
1937	GO_NEGATIVE_REGULATION_OF_PROTEIN_CATABOLIC_PROCESS	GO_NEGATIVE_REGULATION_OF_PROTEIN_CATABOLIC_PROCESS		87	-0.383919	-1.41011	0.0364299	0.108565	1	2995	tags=33%, list=21%, signal=42%
1938	KRAS.50_UP.V1_DN	KRAS.50_UP.V1_DN		19	-0.518965	-1.40986	0.0947368	0.108667	1	942	tags=21%, list=7%, signal=23%
1939	GO_REGULATION_OF_BONE_RESORPTION	GO_REGULATION_OF_BONE_RESORPTION		25	-0.492139	-1.40981	0.0897704	0.108684	1	1043	tags=24%, list=7%, signal=26%
1940	GCM_CSNK1A1	GCM_CSNK1A1		28	-0.480093	-1.40939	0.08159	0.108951	1	2944	tags=36%, list=21%, signal=45%
1941	PID_NECTIN_PATHWAY	PID_NECTIN_PATHWAY		28	-0.481541	-1.40932	0.0647182	0.108985	1	967	tags=21%, list=7%, signal=23%
1942	GO_MAINTENANCE_OF_PROTEIN_LOCALIZATION_IN_ORGANELLE	GO_MAINTENANCE_OF_PROTEIN_LOCALIZATION_IN_ORGANELLE		24	-0.495509	-1.40919	0.0909091	0.10904	1	480	tags=13%, list=3%, signal=13%
1943	TIEN_INTESTINE_PROBIOTICS_2HR_DN	TIEN_INTESTINE_PROBIOTICS_2HR_DN		70	-0.401974	-1.40921	0.0340909	0.109058	1	1755	tags=26%, list=12%, signal=29%
1944	PID_INTEGRIN2_PATHWAY	PID_INTEGRIN2_PATHWAY		21	-0.511698	-1.40909	0.0855263	0.109086	1	402	tags=19%, list=3%, signal=20%
1945	TSENG_ADIPOGENIC_POTENTIAL_UP	TSENG_ADIPOGENIC_POTENTIAL_UP		22	-0.508675	-1.40892	0.0813008	0.109169	1	2847	tags=50%, list=20%, signal=62%
1946	GO_POSITIVE_REGULATION_OF_CELL_MATRIX_ADHESION	GO_POSITIVE_REGULATION_OF_CELL_MATRIX_ADHESION		30	-0.473026	-1.40847	0.0797665	0.109436	1	1437	tags=20%, list=10%, signal=22%
1947	GO_SIGNAL_TRANSDUCTION_IN_RESPONSE_TO_DNA_DAMAGE	GO_SIGNAL_TRANSDUCTION_IN_RESPONSE_TO_DNA_DAMAGE		83	-0.385571	-1.40829	0.0495238	0.109547	1	1478	tags=18%, list=10%, signal=20%
1948	GO_DEVELOPMENTAL_PROGRAMMED_CELL_DEATH	GO_DEVELOPMENTAL_PROGRAMMED_CELL_DEATH		17	-0.529344	-1.40778	0.092827	0.109884	1	1564	tags=35%, list=11%, signal=40%
1949	GO_CORE_PROMOTER_BINDING	GO_CORE_PROMOTER_BINDING		113	-0.370798	-1.40752	0.0261682	0.109991	1	1679	tags=27%, list=12%, signal=31%
1950	LEE_LIVER_CANCER_MYC_DN	LEE_LIVER_CANCER_MYC_DN		35	-0.450139	-1.40759	0.0545455	0.109996	1	1565	tags=23%, list=11%, signal=26%
1951	GAVIN_FOXP3_TARGETS_CLUSTER_P7	GAVIN_FOXP3_TARGETS_CLUSTER_P7		70	-0.399591	-1.40754	0.0411765	0.110002	1	581	tags=14%, list=4%, signal=15%
1952	GO_POSITIVE_REGULATION_OF_MITOCHONDRION_ORGANIZATION	GO_POSITIVE_REGULATION_OF_MITOCHONDRION_ORGANIZATION		122	-0.361581	-1.407	0.021544	0.110315	1	2597	tags=25%, list=18%, signal=30%
1953	MADAN_DPPA4_TARGETS	MADAN_DPPA4_TARGETS		18	-0.534816	-1.40688	0.106472	0.11035	1	2346	tags=39%, list=17%, signal=47%
1954	GOLDRATH_ANTIGEN_RESPONSE	GOLDRATH_ANTIGEN_RESPONSE		292	-0.326453	-1.40691	0.00499168	0.110351	1	1098	tags=14%, list=8%, signal=15%
1955	GO_PROTEIN_IMPORT_INTO_NUCLEUS_TRANSLOCATION	GO_PROTEIN_IMPORT_INTO_NUCLEUS_TRANSLOCATION		24	-0.499068	-1.40675	0.0700637	0.110353	1	3030	tags=46%, list=21%, signal=58%
1956	GO_TRANSCRIPTION_FACTOR_ACTIVITY_RNA_POLYMERASE_II_DISTAL_ENHANCER_SEQUENCE_SPECIFIC_BINDING	GO_TRANSCRIPTION_FACTOR_ACTIVITY_RNA_POLYMERASE_II_DISTAL_ENHANCER_SEQUENCE_SPECIFIC_BINDING		51	-0.423896	-1.40655	0.0462428	0.110503	1	2103	tags=35%, list=15%, signal=41%
1957	GO_POSITIVE_REGULATION_OF_OSTEOCLAST_DIFFERENTIATION	GO_POSITIVE_REGULATION_OF_OSTEOCLAST_DIFFERENTIATION		19	-0.528423	-1.40619	0.0971074	0.110722	1	1228	tags=47%, list=9%, signal=52%
1958	GO_SYNAPSE_ASSEMBLY	GO_SYNAPSE_ASSEMBLY		32	-0.45926	-1.40615	0.0748441	0.110725	1	466	tags=9%, list=3%, signal=10%
1959	UDAYAKUMAR_MED1_TARGETS_DN	UDAYAKUMAR_MED1_TARGETS_DN		198	-0.342954	-1.40563	0.00353982	0.111057	1	1621	tags=23%, list=11%, signal=25%
1960	BROWNE_HCMV_INFECTION_24HR_UP	BROWNE_HCMV_INFECTION_24HR_UP		116	-0.370512	-1.40495	0.0242086	0.111612	1	560	tags=10%, list=4%, signal=11%
1961	ZHONG_RESPONSE_TO_AZACITIDINE_AND_TSA_UP	ZHONG_RESPONSE_TO_AZACITIDINE_AND_TSA_UP		141	-0.359578	-1.40377	0.027972	0.11238	1	2011	tags=23%, list=14%, signal=26%
1962	FIGUEROA_AML_METHYLATION_CLUSTER_6_DN	FIGUEROA_AML_METHYLATION_CLUSTER_6_DN		15	-0.541908	-1.40368	0.0939457	0.112385	1	1697	tags=33%, list=12%, signal=38%
1963	SASSON_RESPONSE_TO_FORSKOLIN_UP	SASSON_RESPONSE_TO_FORSKOLIN_UP		69	-0.396853	-1.4038	0.0524345	0.112397	1	1097	tags=16%, list=8%, signal=17%
1964	SESTO_RESPONSE_TO_UV_C7	SESTO_RESPONSE_TO_UV_C7		60	-0.414605	-1.40354	0.0455487	0.112469	1	1537	tags=18%, list=11%, signal=20%
1965	REACTOME_HEMOSTASIS	REACTOME_HEMOSTASIS		321	-0.323043	-1.40337	0.00686106	0.112575	1	1755	tags=17%, list=12%, signal=19%
1966	HELLER_HDAC_TARGETS_SILENCED_BY_METHYLATION_DN	HELLER_HDAC_TARGETS_SILENCED_BY_METHYLATION_DN		221	-0.333605	-1.40279	0.0035461	0.112839	1	2220	tags=25%, list=16%, signal=30%
1967	GO_REGULATION_OF_PEPTIDE_SECRETION	GO_REGULATION_OF_PEPTIDE_SECRETION		121	-0.365136	-1.40266	0.0274725	0.11288	1	2129	tags=23%, list=15%, signal=27%
1968	GO_NEGATIVE_REGULATION_OF_AXONOGENESIS	GO_NEGATIVE_REGULATION_OF_AXONOGENESIS		42	-0.438006	-1.40282	0.0593692	0.112884	1	2284	tags=29%, list=16%, signal=34%
1969	GO_POSITIVE_REGULATION_OF_WNT_SIGNALING_PATHWAY	GO_POSITIVE_REGULATION_OF_WNT_SIGNALING_PATHWAY		109	-0.372032	-1.40247	0.0353357	0.112931	1	2108	tags=25%, list=15%, signal=29%
1970	GO_REGULATION_OF_EPITHELIAL_TO_MESENCHYMAL_TRANSITION	GO_REGULATION_OF_EPITHELIAL_TO_MESENCHYMAL_TRANSITION		45	-0.428577	-1.40251	0.0618956	0.112933	1	2034	tags=31%, list=14%, signal=36%
1971	NABA_ECM_REGULATORS	NABA_ECM_REGULATORS		132	-0.362905	-1.40216	0.0200364	0.113052	1	2621	tags=27%, list=18%, signal=32%
1972	GGGCGGR_SP1_Q6	GGGCGGR_SP1_Q6		31	-0.469853	-1.40209	0.0644531	0.113086	1	832	tags=23%, list=6%, signal=24%
1973	MASSARWEH_TAMOXIFEN_RESISTANCE_UP	MASSARWEH_TAMOXIFEN_RESISTANCE_UP		392	-0.319689	-1.40204	0	0.113094	1	1929	tags=21%, list=14%, signal=24%
1974	YAO_TEMPORAL_RESPONSE_TO_PROGESTERONE_CLUSTER_7	YAO_TEMPORAL_RESPONSE_TO_PROGESTERONE_CLUSTER_7		61	-0.412868	-1.40163	0.0564202	0.113339	1	2272	tags=26%, list=16%, signal=31%
1975	PID_SYNDECAN_1_PATHWAY	PID_SYNDECAN_1_PATHWAY		31	-0.459499	-1.40116	0.0633947	0.113608	1	134	tags=6%, list=1%, signal=6%
1976	DURAND_STROMA_NS_UP	DURAND_STROMA_NS_UP		110	-0.367764	-1.40096	0.0303571	0.113643	1	1266	tags=17%, list=9%, signal=19%
1977	HALLMARK_REACTIVE_OXIGEN_SPECIES_PATHWAY	HALLMARK_REACTIVE_OXIGEN_SPECIES_PATHWAY		44	-0.427365	-1.40103	0.0475207	0.113651	1	2246	tags=30%, list=16%, signal=35%
1978	GO_POSITIVE_REGULATION_OF_LIPID_METABOLIC_PROCESS	GO_POSITIVE_REGULATION_OF_LIPID_METABOLIC_PROCESS		91	-0.388951	-1.40073	0.0373832	0.113803	1	1386	tags=22%, list=10%, signal=24%
1979	PEDERSEN_TARGETS_OF_611CTF_ISOFORM_OF_ERBB2	PEDERSEN_TARGETS_OF_611CTF_ISOFORM_OF_ERBB2		63	-0.400593	-1.40061	0.0575816	0.113865	1	927	tags=14%, list=7%, signal=15%
1980	GO_REGULATION_OF_PROTEIN_MATURATION	GO_REGULATION_OF_PROTEIN_MATURATION		54	-0.420544	-1.40048	0.0484496	0.113937	1	1512	tags=17%, list=11%, signal=19%
1981	HARRIS_HYPOXIA	HARRIS_HYPOXIA		63	-0.410264	-1.40027	0.0408998	0.114081	1	1652	tags=24%, list=12%, signal=27%
1982	LABBE_TGFB1_TARGETS_DN	LABBE_TGFB1_TARGETS_DN		75	-0.394866	-1.40016	0.0463822	0.114136	1	1440	tags=20%, list=10%, signal=22%
1983	GO_BILE_ACID_BIOSYNTHETIC_PROCESS	GO_BILE_ACID_BIOSYNTHETIC_PROCESS		15	-0.546795	-1.40004	0.0778947	0.114168	1	610	tags=13%, list=4%, signal=14%
1984	GO_EXOSOME_RNASE_COMPLEX_	GO_EXOSOME_RNASE_COMPLEX_		18	-0.518902	-1.39885	0.104925	0.11493	1	2019	tags=28%, list=14%, signal=32%
1985	GO_NEUROTROPHIN_SIGNALING_PATHWAY	GO_NEUROTROPHIN_SIGNALING_PATHWAY		19	-0.521879	-1.39854	0.0840336	0.115085	1	1755	tags=26%, list=12%, signal=30%
1986	GO_POSITIVE_REGULATION_OF_EPITHELIAL_CELL_PROLIFERATION	GO_POSITIVE_REGULATION_OF_EPITHELIAL_CELL_PROLIFERATION		90	-0.380484	-1.39856	0.0372549	0.115103	1	1437	tags=21%, list=10%, signal=23%
1987	PID_ECADHERIN_NASCENT_AJ_PATHWAY	PID_ECADHERIN_NASCENT_AJ_PATHWAY		38	-0.446711	-1.39843	0.0861345	0.115152	1	1248	tags=18%, list=9%, signal=20%
1988	REACTOME_ACTIVATION_OF_GENES_BY_ATF4	REACTOME_ACTIVATION_OF_GENES_BY_ATF4		22	-0.509056	-1.39815	0.0936864	0.115317	1	2164	tags=36%, list=15%, signal=43%
1989	VERNELL_RETINOBLASTOMA_PATHWAY_DN	VERNELL_RETINOBLASTOMA_PATHWAY_DN		15	-0.547525	-1.39806	0.104925	0.115321	1	366	tags=20%, list=3%, signal=21%
1990	GO_CELL_CELL_ADHESION_VIA_PLASMA_MEMBRANE_ADHESION_MOLECULES	GO_CELL_CELL_ADHESION_VIA_PLASMA_MEMBRANE_ADHESION_MOLECULES		69	-0.394628	-1.39745	0.0537849	0.11576	1	3377	tags=45%, list=24%, signal=59%
1991	MULLIGHAN_NPM1_MUTATED_SIGNATURE_1_DN	MULLIGHAN_NPM1_MUTATED_SIGNATURE_1_DN		89	-0.375469	-1.39699	0.0434783	0.11611	1	1661	tags=18%, list=12%, signal=20%
1992	MIKKELSEN_MEF_ICP_WITH_H3K27ME3	MIKKELSEN_MEF_ICP_WITH_H3K27ME3		62	-0.408666	-1.39681	0.0498084	0.116232	1	1337	tags=18%, list=9%, signal=20%
1993	CORDENONSI_YAP_CONSERVED_SIGNATURE	CORDENONSI_YAP_CONSERVED_SIGNATURE		49	-0.421403	-1.39666	0.0513308	0.116326	1	912	tags=16%, list=6%, signal=17%
1994	GO_REGULATION_OF_MESENCHYMAL_CELL_PROLIFERATION	GO_REGULATION_OF_MESENCHYMAL_CELL_PROLIFERATION		20	-0.52076	-1.39659	0.0792951	0.11635	1	611	tags=25%, list=4%, signal=26%
1995	GO_NEGATIVE_REGULATION_OF_MYELOID_LEUKOCYTE_DIFFERENTIATION	GO_NEGATIVE_REGULATION_OF_MYELOID_LEUKOCYTE_DIFFERENTIATION		31	-0.467486	-1.39644	0.0712788	0.116361	1	910	tags=26%, list=6%, signal=28%
1996	GO_AXON_REGENERATION	GO_AXON_REGENERATION		17	-0.520268	-1.39653	0.11039	0.116363	1	1949	tags=29%, list=14%, signal=34%
1997	REACTOME_PLATELET_AGGREGATION_PLUG_FORMATION	REACTOME_PLATELET_AGGREGATION_PLUG_FORMATION		22	-0.49968	-1.3963	0.0674603	0.116402	1	861	tags=23%, list=6%, signal=24%
1998	WANG_ADIPOGENIC_GENES_REPRESSED_BY_SIRT1	WANG_ADIPOGENIC_GENES_REPRESSED_BY_SIRT1		21	-0.507336	-1.39634	0.0806794	0.116404	1	1195	tags=19%, list=8%, signal=21%
1999	GU_PDEF_TARGETS_DN	GU_PDEF_TARGETS_DN		15	-0.544799	-1.39603	0.0859031	0.116552	1	1439	tags=40%, list=10%, signal=44%
[truncated: 813 more rows]

## Sheet: Hall_C2_C5
Filter	NAME	GS<br> follow link to MSigDB	SIZE	ES	NES	NOM p-val	FDR q-val
1	KEGG_JAK_STAT_SIGNALING_PATHWAY	KEGG_JAK_STAT_SIGNALING_PATHWAY	105	-0.586815	-2.20588	0	1.8397e-05	1
1	GO_REGULATION_OF_INSULIN_RECEPTOR_SIGNALING_PATHWAY	GO_REGULATION_OF_INSULIN_RECEPTOR_SIGNALING_PATHWAY	27	-0.70668	-2.07548	0	0.000215931	2
1	GO_REGULATION_OF_REACTIVE_OXYGEN_SPECIES_BIOSYNTHETIC_PROCESS	GO_REGULATION_OF_REACTIVE_OXYGEN_SPECIES_BIOSYNTHETIC_PROCESS	54	-0.597194	-2.03864	0	0.000358176	3
1	GO_POSITIVE_REGULATION_OF_MAPK_CASCADE	GO_POSITIVE_REGULATION_OF_MAPK_CASCADE	300	-0.467152	-2.0182	0	0.000485902	4
1	GO_REGULATION_OF_NITRIC_OXIDE_BIOSYNTHETIC_PROCESS	GO_REGULATION_OF_NITRIC_OXIDE_BIOSYNTHETIC_PROCESS	42	-0.627816	-2.0042	0	0.000598593	5
1	GO_REGULATION_OF_REACTIVE_OXYGEN_SPECIES_METABOLIC_PROCESS	GO_REGULATION_OF_REACTIVE_OXYGEN_SPECIES_METABOLIC_PROCESS	113	-0.514071	-1.94966	0	0.00125481	6
1	GO_POSITIVE_REGULATION_OF_REACTIVE_OXYGEN_SPECIES_METABOLIC_PROCESS	GO_POSITIVE_REGULATION_OF_REACTIVE_OXYGEN_SPECIES_METABOLIC_PROCESS	67	-0.526916	-1.85748	0	0.00372431	7
1	GO_POSITIVE_REGULATION_OF_REACTIVE_OXYGEN_SPECIES_BIOSYNTHETIC_PROCESS	GO_POSITIVE_REGULATION_OF_REACTIVE_OXYGEN_SPECIES_BIOSYNTHETIC_PROCESS	40	-0.577732	-1.85006	0	0.00401796	8
1	GO_REGULATION_OF_MAPK_CASCADE	GO_REGULATION_OF_MAPK_CASCADE	437	-0.411073	-1.83829	0	0.00460273	9
1	GO_RNA_PHOSPHODIESTER_BOND_HYDROLYSIS_EXONUCLEOLYTIC	GO_RNA_PHOSPHODIESTER_BOND_HYDROLYSIS_EXONUCLEOLYTIC	26	-0.632398	-1.83478	0.00617284	0.00479298	10
1	GO_POSITIVE_REGULATION_OF_MAP_KINASE_ACTIVITY	GO_POSITIVE_REGULATION_OF_MAP_KINASE_ACTIVITY	140	-0.450714	-1.75424	0	0.0104981	11
1	GO_REGULATION_OF_PHOSPHOLIPID_METABOLIC_PROCESS	GO_REGULATION_OF_PHOSPHOLIPID_METABOLIC_PROCESS	45	-0.532706	-1.74027	0.00420168	0.0119005	12
1	GO_REGULATION_OF_PHOSPHATIDYLINOSITOL_3_KINASE_ACTIVITY	GO_REGULATION_OF_PHOSPHATIDYLINOSITOL_3_KINASE_ACTIVITY	28	-0.58735	-1.71848	0.0103093	0.0144335	13
1	GO_CELLULAR_RESPONSE_TO_GLUCOSE_STARVATION	GO_CELLULAR_RESPONSE_TO_GLUCOSE_STARVATION	25	-0.571466	-1.66368	0.0264317	0.0222244	14
1	GO_PROTEIN_POLYUBIQUITINATION	GO_PROTEIN_POLYUBIQUITINATION	209	-0.397229	-1.64286	0	0.0257801	15
1	GO_POSITIVE_REGULATION_OF_PHOSPHATIDYLINOSITOL_3_KINASE_SIGNALING	GO_POSITIVE_REGULATION_OF_PHOSPHATIDYLINOSITOL_3_KINASE_SIGNALING	41	-0.510667	-1.62349	0.00865801	0.0295772	16
1	GO_POSITIVE_REGULATION_OF_PHOSPHOLIPID_METABOLIC_PROCESS	GO_POSITIVE_REGULATION_OF_PHOSPHOLIPID_METABOLIC_PROCESS	30	-0.53909	-1.60975	0.0220441	0.0323824	17
1	GO_REGULATION_OF_PHOSPHATIDYLINOSITOL_3_KINASE_SIGNALING	GO_REGULATION_OF_PHOSPHATIDYLINOSITOL_3_KINASE_SIGNALING	91	-0.437305	-1.60948	0.00398406	0.0324272	18
1	GO_POSITIVE_REGULATION_OF_MONOOXYGENASE_ACTIVITY	GO_POSITIVE_REGULATION_OF_MONOOXYGENASE_ACTIVITY	20	-0.584724	-1.57872	0.0286976	0.039768	19
1	GO_REGULATION_OF_MAP_KINASE_ACTIVITY	GO_REGULATION_OF_MAP_KINASE_ACTIVITY	227	-0.369096	-1.56015	0	0.0448687	20
1	GO_REGULATION_OF_STEROID_BIOSYNTHETIC_PROCESS	GO_REGULATION_OF_STEROID_BIOSYNTHETIC_PROCESS	28	-0.526627	-1.53159	0.0384615	0.0539552	21
1	GO_PURINE_NUCLEOBASE_METABOLIC_PROCESS	GO_PURINE_NUCLEOBASE_METABOLIC_PROCESS	20	-0.55767	-1.52716	0.0340909	0.0553456	22
1	KEGG_NICOTINATE_AND_NICOTINAMIDE_METABOLISM	KEGG_NICOTINATE_AND_NICOTINAMIDE_METABOLISM	17	-0.576917	-1.52242	0.0426829	0.0567951	23
1	GO_POSITIVE_REGULATION_OF_STEROID_METABOLIC_PROCESS	GO_POSITIVE_REGULATION_OF_STEROID_METABOLIC_PROCESS	16	-0.573347	-1.50427	0.0688259	0.0631746	24
1	GO_UBIQUITIN_LIKE_PROTEIN_LIGASE_BINDING	GO_UBIQUITIN_LIKE_PROTEIN_LIGASE_BINDING	216	-0.361476	-1.49042	0.00167224	0.0685112	25
1	GO_TETRAHYDROFOLATE_METABOLIC_PROCESS	GO_TETRAHYDROFOLATE_METABOLIC_PROCESS	18	-0.554956	-1.48408	0.0465116	0.0710604	26
1	GO_POLYUBIQUITIN_BINDING	GO_POLYUBIQUITIN_BINDING	32	-0.483349	-1.47217	0.045098	0.0760591	27
1	KEGG_O_GLYCAN_BIOSYNTHESIS	KEGG_O_GLYCAN_BIOSYNTHESIS	20	-0.528233	-1.45067	0.0593047	0.0864434	28
1	GO_REGULATION_OF_MONOOXYGENASE_ACTIVITY	GO_REGULATION_OF_MONOOXYGENASE_ACTIVITY	47	-0.445473	-1.45042	0.0416667	0.0865148	29
1	GO_NEGATIVE_REGULATION_OF_REACTIVE_OXYGEN_SPECIES_METABOLIC_PROCESS	GO_NEGATIVE_REGULATION_OF_REACTIVE_OXYGEN_SPECIES_METABOLIC_PROCESS	30	-0.483	-1.43773	0.0454545	0.0930626	30
1	GO_CELLULAR_RESPONSE_TO_FATTY_ACID	GO_CELLULAR_RESPONSE_TO_FATTY_ACID	38	-0.458506	-1.43385	0.056338	0.0950277	31
1	GO_NEGATIVE_REGULATION_OF_DNA_BIOSYNTHETIC_PROCESS	GO_NEGATIVE_REGULATION_OF_DNA_BIOSYNTHETIC_PROCESS	19	-0.5147	-1.42298	0.0886076	0.101125	32
1	GO_RIBONUCLEOSIDE_CATABOLIC_PROCESS	GO_RIBONUCLEOSIDE_CATABOLIC_PROCESS	22	-0.513078	-1.40964	0.0786749	0.108793	33
1	GO_UBIQUITIN_LIKE_PROTEIN_SPECIFIC_PROTEASE_ACTIVITY	GO_UBIQUITIN_LIKE_PROTEIN_SPECIFIC_PROTEASE_ACTIVITY	82	-0.370901	-1.38362	0.0466019	0.124368	34
1	GO_PYRIDINE_CONTAINING_COMPOUND_BIOSYNTHETIC_PROCESS	GO_PYRIDINE_CONTAINING_COMPOUND_BIOSYNTHETIC_PROCESS	15	-0.549376	-1.38335	0.116803	0.124494	35
1	KEGG_MAPK_SIGNALING_PATHWAY	KEGG_MAPK_SIGNALING_PATHWAY	198	-0.328463	-1.37584	0.0147601	0.129072	36
1	GO_FATTY_ACYL_COA_METABOLIC_PROCESS	GO_FATTY_ACYL_COA_METABOLIC_PROCESS	33	-0.452852	-1.3712	0.103659	0.13202	37
1	KEGG_TRYPTOPHAN_METABOLISM	KEGG_TRYPTOPHAN_METABOLISM	28	-0.462621	-1.36233	0.0918164	0.138044	38
1	GO_POSITIVE_REGULATION_OF_RELEASE_OF_CYTOCHROME_C_FROM_MITOCHONDRIA	GO_POSITIVE_REGULATION_OF_RELEASE_OF_CYTOCHROME_C_FROM_MITOCHONDRIA	22	-0.487493	-1.33388	0.120763	0.158163	39
1	GO_RNA_CATABOLIC_PROCESS	GO_RNA_CATABOLIC_PROCESS	194	-0.323052	-1.32675	0.0272109	0.164254	40
1	GO_SPHINGOLIPID_BIOSYNTHETIC_PROCESS	GO_SPHINGOLIPID_BIOSYNTHETIC_PROCESS	42	-0.412273	-1.32546	0.0980769	0.165191	41
1	GO_POSITIVE_REGULATION_OF_PHOSPHOLIPASE_ACTIVITY	GO_POSITIVE_REGULATION_OF_PHOSPHOLIPASE_ACTIVITY	34	-0.428992	-1.30579	0.136	0.181268	42
1	GO_REGULATION_OF_STEROID_METABOLIC_PROCESS	GO_REGULATION_OF_STEROID_METABOLIC_PROCESS	42	-0.407482	-1.29453	0.122137	0.191306	43
1	GO_PYRIMIDINE_NUCLEOSIDE_CATABOLIC_PROCESS	GO_PYRIMIDINE_NUCLEOSIDE_CATABOLIC_PROCESS	17	-0.499761	-1.29035	0.191983	0.195385	44
1	GO_PROTEIN_UBIQUITINATION	GO_PROTEIN_UBIQUITINATION	469	-0.287737	-1.2867	0.0229885	0.198528	45
1	GO_REGULATION_OF_PROTEIN_UBIQUITINATION_INVOLVED_IN_UBIQUITIN_DEPENDENT_PROTEIN_CATABOLIC_PROCESS	GO_REGULATION_OF_PROTEIN_UBIQUITINATION_INVOLVED_IN_UBIQUITIN_DEPENDENT_PROTEIN_CATABOLIC_PROCESS	91	-0.345084	-1.28338	0.0856574	0.20182	46
1	GO_REGULATION_OF_LIPID_METABOLIC_PROCESS	GO_REGULATION_OF_LIPID_METABOLIC_PROCESS	188	-0.31148	-1.27544	0.0560579	0.209136	47
1	GO_REGULATION_OF_OXIDOREDUCTASE_ACTIVITY	GO_REGULATION_OF_OXIDOREDUCTASE_ACTIVITY	62	-0.358919	-1.26931	0.114943	0.215048	48
1	GO_SULFUR_COMPOUND_BIOSYNTHETIC_PROCESS	GO_SULFUR_COMPOUND_BIOSYNTHETIC_PROCESS	143	-0.321005	-1.26654	0.0611511	0.217383	49
1	GO_LIPID_STORAGE	GO_LIPID_STORAGE	17	-0.483007	-1.25846	0.201258	0.225769	50
1	KEGG_SPHINGOLIPID_METABOLISM	KEGG_SPHINGOLIPID_METABOLISM	23	-0.453026	-1.2553	0.163306	0.228933	51
1	GO_UBIQUITIN_LIKE_PROTEIN_BINDING	GO_UBIQUITIN_LIKE_PROTEIN_BINDING	91	-0.342768	-1.24751	0.092803	0.237021	52
1	GO_PHENOL_CONTAINING_COMPOUND_METABOLIC_PROCESS	GO_PHENOL_CONTAINING_COMPOUND_METABOLIC_PROCESS	38	-0.397837	-1.24236	0.15625	0.242677	53
1	GO_REGULATION_OF_GLYCOPROTEIN_METABOLIC_PROCESS	GO_REGULATION_OF_GLYCOPROTEIN_METABOLIC_PROCESS	32	-0.724617	-2.23688	0	4.3239e-06	54
1	GO_RESPONSE_TO_HYDROGEN_PEROXIDE	GO_RESPONSE_TO_HYDROGEN_PEROXIDE	88	-0.563212	-2.03872	0	0.000358576	55
1	GO_CELLULAR_RESPONSE_TO_LIPID	GO_CELLULAR_RESPONSE_TO_LIPID	299	-0.470872	-2.029	0	0.000397638	56
1	GO_POSITIVE_REGULATION_OF_GLYCOPROTEIN_METABOLIC_PROCESS	GO_POSITIVE_REGULATION_OF_GLYCOPROTEIN_METABOLIC_PROCESS	17	-0.76468	-1.98269	0	0.000817832	57
1	GO_PROTEIN_PHOSPHATASE_2A_BINDING	GO_PROTEIN_PHOSPHATASE_2A_BINDING	24	-0.685516	-1.95883	0.00204082	0.00111729	58
1	GO_RELEASE_OF_CYTOCHROME_C_FROM_MITOCHONDRIA	GO_RELEASE_OF_CYTOCHROME_C_FROM_MITOCHONDRIA	17	-0.747413	-1.95549	0	0.00116828	59
1	GO_RESPONSE_TO_REACTIVE_OXYGEN_SPECIES	GO_RESPONSE_TO_REACTIVE_OXYGEN_SPECIES	147	-0.491921	-1.91317	0	0.00204072	60
1	GO_REGULATION_OF_TYROSINE_PHOSPHORYLATION_OF_STAT3_PROTEIN	GO_REGULATION_OF_TYROSINE_PHOSPHORYLATION_OF_STAT3_PROTEIN	30	-0.644329	-1.91222	0.00199203	0.00205581	61
1	GO_RESPONSE_TO_KETONE	GO_RESPONSE_TO_KETONE	124	-0.494282	-1.91127	0	0.00207304	62
1	GO_RESPONSE_TO_CORTICOSTEROID	GO_RESPONSE_TO_CORTICOSTEROID	110	-0.498322	-1.89668	0	0.00241053	63
1	BIOCARTA_CERAMIDE_PATHWAY	BIOCARTA_CERAMIDE_PATHWAY	20	-0.684917	-1.81976	0	0.00555906	64
1	KEGG_ADIPOCYTOKINE_SIGNALING_PATHWAY	KEGG_ADIPOCYTOKINE_SIGNALING_PATHWAY	55	-0.526826	-1.79143	0	0.00742026	65
1	HALLMARK_HYPOXIA	HALLMARK_HYPOXIA	159	-0.438679	-1.7524	0	0.010636	66
1	GO_RESPONSE_TO_AMINO_ACID	GO_RESPONSE_TO_AMINO_ACID	77	-0.487403	-1.73495	0	0.0124916	67
1	GO_CELLULAR_RESPONSE_TO_REACTIVE_OXYGEN_SPECIES	GO_CELLULAR_RESPONSE_TO_REACTIVE_OXYGEN_SPECIES	81	-0.473783	-1.73253	0	0.0127332	68
1	GO_GUANYL_NUCLEOTIDE_BINDING	GO_GUANYL_NUCLEOTIDE_BINDING	267	-0.400683	-1.71353	0	0.0150914	69
1	GO_RESPONSE_TO_NICOTINE	GO_RESPONSE_TO_NICOTINE	25	-0.586378	-1.71111	0.00425532	0.0154153	70
1	GO_CELLULAR_RESPONSE_TO_NUTRIENT	GO_CELLULAR_RESPONSE_TO_NUTRIENT	32	-0.568363	-1.7064	0.00399202	0.01597	71
1	GO_REGULATION_OF_CAMP_MEDIATED_SIGNALING	GO_REGULATION_OF_CAMP_MEDIATED_SIGNALING	17	-0.640839	-1.69665	0.012685	0.0171952	72
1	GO_POSITIVE_REGULATION_OF_CYCLIC_NUCLEOTIDE_METABOLIC_PROCESS	GO_POSITIVE_REGULATION_OF_CYCLIC_NUCLEOTIDE_METABOLIC_PROCESS	51	-0.512767	-1.69411	0.00392157	0.017498	73
1	GO_RESPONSE_TO_OXYGEN_LEVELS	GO_RESPONSE_TO_OXYGEN_LEVELS	226	-0.403546	-1.68409	0	0.0190317	74
1	GO_REGULATION_OF_LIPID_KINASE_ACTIVITY	GO_REGULATION_OF_LIPID_KINASE_ACTIVITY	36	-0.543306	-1.68151	0.00824742	0.0194237	75
1	GO_RESPONSE_TO_HYDROPEROXIDE	GO_RESPONSE_TO_HYDROPEROXIDE	15	-0.677067	-1.67494	0.0214133	0.0204117	76
1	GO_NEGATIVE_REGULATION_OF_HYDROLASE_ACTIVITY	GO_NEGATIVE_REGULATION_OF_HYDROLASE_ACTIVITY	235	-0.394257	-1.66598	0	0.0218407	77
1	GO_POSITIVE_REGULATION_OF_NUCLEOTIDE_METABOLIC_PROCESS	GO_POSITIVE_REGULATION_OF_NUCLEOTIDE_METABOLIC_PROCESS	67	-0.467043	-1.65225	0.00785855	0.0240413	78
1	GO_RESPONSE_TO_NUTRIENT	GO_RESPONSE_TO_NUTRIENT	147	-0.416574	-1.6519	0.00179211	0.0240831	79
1	GO_REGULATION_OF_CYCLIC_NUCLEOTIDE_METABOLIC_PROCESS	GO_REGULATION_OF_CYCLIC_NUCLEOTIDE_METABOLIC_PROCESS	70	-0.45997	-1.62772	0.00570342	0.0287389	80
1	GO_NAD_ADP_RIBOSYLTRANSFERASE_ACTIVITY	GO_NAD_ADP_RIBOSYLTRANSFERASE_ACTIVITY	24	-0.56316	-1.62064	0.0310559	0.0301497	81
1	GO_SECONDARY_METABOLIC_PROCESS	GO_SECONDARY_METABOLIC_PROCESS	24	-0.57254	-1.61885	0.0148936	0.0305635	82
1	GO_REGULATION_OF_MITOCHONDRIAL_MEMBRANE_POTENTIAL	GO_REGULATION_OF_MITOCHONDRIAL_MEMBRANE_POTENTIAL	40	-0.509601	-1.61042	0.0123203	0.0322559	83
1	BIOCARTA_GSK3_PATHWAY	BIOCARTA_GSK3_PATHWAY	25	-0.560933	-1.60179	0.0175781	0.0342116	84
1	GO_RESPONSE_TO_FATTY_ACID	GO_RESPONSE_TO_FATTY_ACID	60	-0.456257	-1.59217	0.00393701	0.036509	85
1	GO_NEGATIVE_REGULATION_OF_FAT_CELL_DIFFERENTIATION	GO_NEGATIVE_REGULATION_OF_FAT_CELL_DIFFERENTIATION	26	-0.546493	-1.59029	0.0165289	0.0369838	86
1	GO_RESPONSE_TO_RETINOIC_ACID	GO_RESPONSE_TO_RETINOIC_ACID	62	-0.462115	-1.58975	0.00199203	0.0370863	87
1	GO_POSITIVE_REGULATION_OF_MRNA_METABOLIC_PROCESS	GO_POSITIVE_REGULATION_OF_MRNA_METABOLIC_PROCESS	37	-0.507945	-1.5786	0.0252427	0.0397986	88
1	GO_REGULATION_OF_RELEASE_OF_SEQUESTERED_CALCIUM_ION_INTO_CYTOSOL	GO_REGULATION_OF_RELEASE_OF_SEQUESTERED_CALCIUM_ION_INTO_CYTOSOL	44	-0.488373	-1.5783	0.0137795	0.039884	89
1	GO_REGULATION_OF_MRNA_CATABOLIC_PROCESS	GO_REGULATION_OF_MRNA_CATABOLIC_PROCESS	23	-0.558223	-1.57597	0.0313725	0.0405753	90
1	GO_POSITIVE_REGULATION_OF_LIPID_KINASE_ACTIVITY	GO_POSITIVE_REGULATION_OF_LIPID_KINASE_ACTIVITY	22	-0.574653	-1.57401	0.0231092	0.0410018	91
1	GO_REGULATION_OF_SEQUESTERING_OF_CALCIUM_ION	GO_REGULATION_OF_SEQUESTERING_OF_CALCIUM_ION	71	-0.44824	-1.57108	0.00801603	0.0419829	92
1	GO_ENZYME_INHIBITOR_ACTIVITY	GO_ENZYME_INHIBITOR_ACTIVITY	216	-0.377462	-1.56893	0	0.0424382	93
1	GO_REGULATION_OF_CALCIUM_ION_TRANSPORT	GO_REGULATION_OF_CALCIUM_ION_TRANSPORT	124	-0.401664	-1.55611	0.00701754	0.0460581	94
1	GO_REGULATION_OF_RESPONSE_TO_REACTIVE_OXYGEN_SPECIES	GO_REGULATION_OF_RESPONSE_TO_REACTIVE_OXYGEN_SPECIES	24	-0.537732	-1.55198	0.0337302	0.047272	95
1	GO_POSITIVE_REGULATION_OF_CELLULAR_AMIDE_METABOLIC_PROCESS	GO_POSITIVE_REGULATION_OF_CELLULAR_AMIDE_METABOLIC_PROCESS	84	-0.428842	-1.5496	0.00570342	0.0480732	96
1	GO_REGULATION_OF_RESPONSE_TO_OXIDATIVE_STRESS	GO_REGULATION_OF_RESPONSE_TO_OXIDATIVE_STRESS	47	-0.478299	-1.54581	0.0182927	0.0491644	97
1	GO_POSITIVE_REGULATION_OF_LIPID_TRANSPORT	GO_POSITIVE_REGULATION_OF_LIPID_TRANSPORT	35	-0.493483	-1.54308	0.028169	0.0499967	98
1	GO_REGULATION_OF_FAT_CELL_DIFFERENTIATION	GO_REGULATION_OF_FAT_CELL_DIFFERENTIATION	61	-0.451236	-1.54072	0.0196464	0.0508236	99
1	GO_LIPID_PARTICLE	GO_LIPID_PARTICLE	38	-0.483183	-1.52794	0.0180361	0.055139	100
1	GO_RESPONSE_TO_ATP	GO_RESPONSE_TO_ATP	22	-0.564476	-1.52628	0.047817	0.0555966	101
1	GO_POSITIVE_REGULATION_OF_RELEASE_OF_SEQUESTERED_CALCIUM_ION_INTO_CYTOSOL	GO_POSITIVE_REGULATION_OF_RELEASE_OF_SEQUESTERED_CALCIUM_ION_INTO_CYTOSOL	22	-0.552059	-1.52621	0.0345572	0.0556073	102
1	GO_CELLULAR_RESPONSE_TO_KETONE	GO_CELLULAR_RESPONSE_TO_KETONE	52	-0.456088	-1.52403	0.0199203	0.0562593	103
1	GO_ACTIVATION_OF_MAPK_ACTIVITY	GO_ACTIVATION_OF_MAPK_ACTIVITY	92	-0.414131	-1.52363	0.00594059	0.0563714	104
1	BIOCARTA_MITOCHONDRIA_PATHWAY	BIOCARTA_MITOCHONDRIA_PATHWAY	17	-0.597163	-1.52067	0.0393013	0.0573294	105
1	GO_POSITIVE_REGULATION_OF_CAMP_METABOLIC_PROCESS	GO_POSITIVE_REGULATION_OF_CAMP_METABOLIC_PROCESS	44	-0.46806	-1.52036	0.0252427	0.0574265	106
1	GO_POSITIVE_REGULATION_OF_OXIDOREDUCTASE_ACTIVITY	GO_POSITIVE_REGULATION_OF_OXIDOREDUCTASE_ACTIVITY	30	-0.503905	-1.50907	0.0315126	0.061401	107
1	GO_CYCLIC_NUCLEOTIDE_METABOLIC_PROCESS	GO_CYCLIC_NUCLEOTIDE_METABOLIC_PROCESS	31	-0.500942	-1.50126	0.0254403	0.0643028	108
1	GO_MUCOPOLYSACCHARIDE_METABOLIC_PROCESS	GO_MUCOPOLYSACCHARIDE_METABOLIC_PROCESS	72	-0.424064	-1.5011	0.00821355	0.0643438	109
1	GO_REGULATION_OF_LIPID_STORAGE	GO_REGULATION_OF_LIPID_STORAGE	31	-0.499975	-1.49937	0.0506073	0.0650011	110
1	GO_NEGATIVE_REGULATION_OF_CALCIUM_ION_TRANSPORT	GO_NEGATIVE_REGULATION_OF_CALCIUM_ION_TRANSPORT	29	-0.506225	-1.49638	0.0388548	0.0661605	111
1	GO_HYALURONAN_METABOLIC_PROCESS	GO_HYALURONAN_METABOLIC_PROCESS	21	-0.537168	-1.49377	0.0413223	0.0671562	112
1	BIOCARTA_ATM_PATHWAY	BIOCARTA_ATM_PATHWAY	20	-0.543279	-1.48114	0.0473251	0.0723579	113
1	GO_REGULATION_OF_NUCLEOTIDE_METABOLIC_PROCESS	GO_REGULATION_OF_NUCLEOTIDE_METABOLIC_PROCESS	110	-0.394248	-1.47619	0.0112994	0.0743844	114
1	GO_REGULATION_OF_CALCIUM_ION_TRANSMEMBRANE_TRANSPORT	GO_REGULATION_OF_CALCIUM_ION_TRANSMEMBRANE_TRANSPORT	67	-0.418389	-1.47517	0.0238095	0.0748606	115
1	GO_CAMP_METABOLIC_PROCESS	GO_CAMP_METABOLIC_PROCESS	18	-0.565544	-1.4724	0.0608696	0.0759629	116
1	GO_POSITIVE_REGULATION_OF_CATABOLIC_PROCESS	GO_POSITIVE_REGULATION_OF_CATABOLIC_PROCESS	319	-0.337094	-1.46966	0.00171527	0.0771897	117
1	GO_OXIDOREDUCTASE_ACTIVITY_ACTING_ON_PAIRED_DONORS_WITH_INCORPORATION_OR_REDUCTION_OF_MOLECULAR_OXYGEN_NAD_P_H_AS_ONE_DONOR_AND_INCORPORATION_OF_ONE_ATOM_OF_OXYGEN	GO_OXIDOREDUCTASE_ACTIVITY_ACTING_ON_PAIRED_DONORS_WITH_INCORPORATION_OR_REDUCTION_OF_MOLECULAR_OXYGEN_NAD_P_H_AS_ONE_DONOR_AND_INCORPORATION_OF_ONE_ATOM_OF_OXYGEN	23	-0.510056	-1.46941	0.0536779	0.0772943	118
1	GO_REGULATION_OF_CELLULAR_AMINE_METABOLIC_PROCESS	GO_REGULATION_OF_CELLULAR_AMINE_METABOLIC_PROCESS	68	-0.409853	-1.45247	0.0429688	0.0856656	119
1	GO_COENZYME_BIOSYNTHETIC_PROCESS	GO_COENZYME_BIOSYNTHETIC_PROCESS	101	-0.378058	-1.43825	0.0209125	0.0928528	120
1	GO_ION_HOMEOSTASIS	GO_ION_HOMEOSTASIS	351	-0.329972	-1.43702	0	0.0934557	121
1	GO_DEAMINASE_ACTIVITY	GO_DEAMINASE_ACTIVITY	25	-0.487383	-1.42325	0.0542636	0.100997	122
1	GO_REGULATION_OF_PLASMA_LIPOPROTEIN_PARTICLE_LEVELS	GO_REGULATION_OF_PLASMA_LIPOPROTEIN_PARTICLE_LEVELS	30	-0.474773	-1.41597	0.0710059	0.105073	123
1	GO_CELLULAR_RESPONSE_TO_RETINOIC_ACID	GO_CELLULAR_RESPONSE_TO_RETINOIC_ACID	34	-0.463352	-1.41099	0.0711539	0.108081	124
1	GO_AMINOGLYCAN_METABOLIC_PROCESS	GO_AMINOGLYCAN_METABOLIC_PROCESS	111	-0.3729	-1.41017	0.0240741	0.108554	125
1	GO_NEGATIVE_REGULATION_OF_PROTEIN_CATABOLIC_PROCESS	GO_NEGATIVE_REGULATION_OF_PROTEIN_CATABOLIC_PROCESS	87	-0.383919	-1.41011	0.0364299	0.108565	126
1	GO_POSITIVE_REGULATION_OF_MITOCHONDRION_ORGANIZATION	GO_POSITIVE_REGULATION_OF_MITOCHONDRION_ORGANIZATION	122	-0.361581	-1.407	0.021544	0.110315	127
1	HALLMARK_REACTIVE_OXIGEN_SPECIES_PATHWAY	HALLMARK_REACTIVE_OXIGEN_SPECIES_PATHWAY	44	-0.427365	-1.40103	0.0475207	0.113651	128
1	GO_POSITIVE_REGULATION_OF_LIPID_METABOLIC_PROCESS	GO_POSITIVE_REGULATION_OF_LIPID_METABOLIC_PROCESS	91	-0.388951	-1.40073	0.0373832	0.113803	129
1	GO_BILE_ACID_BIOSYNTHETIC_PROCESS	GO_BILE_ACID_BIOSYNTHETIC_PROCESS	15	-0.546795	-1.40004	0.0778947	0.114168	130
1	GO_REGULATION_OF_MRNA_METABOLIC_PROCESS	GO_REGULATION_OF_MRNA_METABOLIC_PROCESS	81	-0.37598	-1.38134	0.0495413	0.125461	131
1	GO_REGULATION_OF_MEMBRANE_LIPID_DISTRIBUTION	GO_REGULATION_OF_MEMBRANE_LIPID_DISTRIBUTION	25	-0.487672	-1.37907	0.0944882	0.126857	132
1	GO_RESPONSE_TO_PROSTAGLANDIN	GO_RESPONSE_TO_PROSTAGLANDIN	23	-0.49615	-1.37617	0.0809129	0.128869	133
1	GO_GANGLIOSIDE_METABOLIC_PROCESS	GO_GANGLIOSIDE_METABOLIC_PROCESS	19	-0.518841	-1.373	0.0972222	0.130925	134
1	GO_ACTIVATION_OF_MAPKK_ACTIVITY	GO_ACTIVATION_OF_MAPKK_ACTIVITY	40	-0.434322	-1.37058	0.0590631	0.132425	135
1	GO_CELLULAR_RESPONSE_TO_CORTICOSTEROID_STIMULUS	GO_CELLULAR_RESPONSE_TO_CORTICOSTEROID_STIMULUS	32	-0.4475	-1.35635	0.0723141	0.142001	136
1	GO_CELLULAR_RESPONSE_TO_STARVATION	GO_CELLULAR_RESPONSE_TO_STARVATION	86	-0.368053	-1.35086	0.0598131	0.145803	137
1	GO_REGULATION_OF_LIPID_TRANSPORT	GO_REGULATION_OF_LIPID_TRANSPORT	60	-0.387258	-1.35001	0.0710059	0.146353	138
1	GO_AMINOGLYCAN_BIOSYNTHETIC_PROCESS	GO_AMINOGLYCAN_BIOSYNTHETIC_PROCESS	72	-0.381242	-1.34746	0.0661626	0.148221	139
1	GO_GLYCOSYL_COMPOUND_CATABOLIC_PROCESS	GO_GLYCOSYL_COMPOUND_CATABOLIC_PROCESS	36	-0.433447	-1.34202	0.108159	0.152174	140
1	GO_REGULATION_OF_PROTEIN_CATABOLIC_PROCESS	GO_REGULATION_OF_PROTEIN_CATABOLIC_PROCESS	317	-0.308048	-1.33853	0.0197694	0.154694	141
1	GO_MITOCHONDRIAL_MEMBRANE_ORGANIZATION	GO_MITOCHONDRIAL_MEMBRANE_ORGANIZATION	77	-0.380455	-1.33573	0.0666667	0.156866	142
1	GO_POSITIVE_REGULATION_OF_PROTEIN_CATABOLIC_PROCESS	GO_POSITIVE_REGULATION_OF_PROTEIN_CATABOLIC_PROCESS	215	-0.324277	-1.33099	0.0226087	0.160612	143
1	GO_ORGANIC_CYCLIC_COMPOUND_CATABOLIC_PROCESS	GO_ORGANIC_CYCLIC_COMPOUND_CATABOLIC_PROCESS	331	-0.306946	-1.32794	0.0139373	0.163159	144
1	GO_RESPONSE_TO_INCREASED_OXYGEN_LEVELS	GO_RESPONSE_TO_INCREASED_OXYGEN_LEVELS	18	-0.499617	-1.32346	0.145161	0.166639	145
1	GO_NEGATIVE_REGULATION_OF_RESPONSE_TO_OXIDATIVE_STRESS	GO_NEGATIVE_REGULATION_OF_RESPONSE_TO_OXIDATIVE_STRESS	26	-0.457404	-1.31643	0.124444	0.172399	146
1	GO_KERATAN_SULFATE_BIOSYNTHETIC_PROCESS	GO_KERATAN_SULFATE_BIOSYNTHETIC_PROCESS	23	-0.469867	-1.31289	0.131635	0.175304	147
1	GO_POSITIVE_REGULATION_OF_LIPASE_ACTIVITY	GO_POSITIVE_REGULATION_OF_LIPASE_ACTIVITY	42	-0.401073	-1.31154	0.103383	0.176559	148
1	GO_LIPID_TRANSLOCATION	GO_LIPID_TRANSLOCATION	17	-0.497946	-1.30952	0.131696	0.178197	149
1	GO_PHOSPHOLIPID_TRANSPORTER_ACTIVITY	GO_PHOSPHOLIPID_TRANSPORTER_ACTIVITY	26	-0.46169	-1.30863	0.128205	0.178928	150
1	GO_THIOESTER_BIOSYNTHETIC_PROCESS	GO_THIOESTER_BIOSYNTHETIC_PROCESS	39	-0.413589	-1.29203	0.108787	0.193804	151
1	GO_ARACHIDONIC_ACID_METABOLIC_PROCESS	GO_ARACHIDONIC_ACID_METABOLIC_PROCESS	30	-0.436311	-1.28895	0.145161	0.19669	152
1	GO_KERATAN_SULFATE_METABOLIC_PROCESS	GO_KERATAN_SULFATE_METABOLIC_PROCESS	28	-0.434185	-1.28779	0.148148	0.197808	153
1	GO_POLYAMINE_METABOLIC_PROCESS	GO_POLYAMINE_METABOLIC_PROCESS	15	-0.519444	-1.2843	0.15894	0.200844	154
1	GO_RESPONSE_TO_PROSTAGLANDIN_E	GO_RESPONSE_TO_PROSTAGLANDIN_E	19	-0.481921	-1.2805	0.16	0.204427	155
1	GO_NEGATIVE_REGULATION_OF_RESPONSE_TO_CYTOKINE_STIMULUS	GO_NEGATIVE_REGULATION_OF_RESPONSE_TO_CYTOKINE_STIMULUS	32	-0.428597	-1.27829	0.137996	0.206488	156
1	GO_FOLIC_ACID_CONTAINING_COMPOUND_METABOLIC_PROCESS	GO_FOLIC_ACID_CONTAINING_COMPOUND_METABOLIC_PROCESS	24	-0.451837	-1.27732	0.145492	0.207438	157
1	GO_CELLULAR_RESPONSE_TO_OXYGEN_LEVELS	GO_CELLULAR_RESPONSE_TO_OXYGEN_LEVELS	107	-0.336252	-1.2765	0.0759259	0.208145	158
1	GO_POLY_PURINE_TRACT_BINDING	GO_POLY_PURINE_TRACT_BINDING	15	-0.509481	-1.27604	0.18552	0.208584	159
1	GO_REGULATION_OF_CAMP_METABOLIC_PROCESS	GO_REGULATION_OF_CAMP_METABOLIC_PROCESS	60	-0.362508	-1.27316	0.110057	0.211158	160
1	GO_AMINE_BIOSYNTHETIC_PROCESS	GO_AMINE_BIOSYNTHETIC_PROCESS	15	-0.503543	-1.27203	0.204499	0.212428	161
1	GO_GDP_BINDING	GO_GDP_BINDING	41	-0.3973	-1.27139	0.131528	0.213011	162
1	GO_AMINE_METABOLIC_PROCESS	GO_AMINE_METABOLIC_PROCESS	80	-0.352671	-1.27088	0.106667	0.21344	163
1	GO_CYCLIC_NUCLEOTIDE_BIOSYNTHETIC_PROCESS	GO_CYCLIC_NUCLEOTIDE_BIOSYNTHETIC_PROCESS	16	-0.503323	-1.26845	0.177966	0.215654	164
1	GO_AMINE_CATABOLIC_PROCESS	GO_AMINE_CATABOLIC_PROCESS	15	-0.49647	-1.2682	0.169978	0.215762	165
1	GO_NEGATIVE_REGULATION_OF_PHOSPHORUS_METABOLIC_PROCESS	GO_NEGATIVE_REGULATION_OF_PHOSPHORUS_METABOLIC_PROCESS	372	-0.287543	-1.26583	0.0287648	0.218233	166
1	GO_NEGATIVE_REGULATION_OF_LIPID_METABOLIC_PROCESS	GO_NEGATIVE_REGULATION_OF_LIPID_METABOLIC_PROCESS	44	-0.394224	-1.26397	0.139918	0.220248	167
1	GO_PROSTANOID_METABOLIC_PROCESS	GO_PROSTANOID_METABOLIC_PROCESS	18	-0.487367	-1.26371	0.171429	0.220422	168
1	GO_RESPONSE_TO_STARVATION	GO_RESPONSE_TO_STARVATION	113	-0.325245	-1.25633	0.0961888	0.227914	169
1	GO_MODULATION_BY_VIRUS_OF_HOST_MORPHOLOGY_OR_PHYSIOLOGY	GO_MODULATION_BY_VIRUS_OF_HOST_MORPHOLOGY_OR_PHYSIOLOGY	32	-0.415363	-1.25504	0.173737	0.229184	170
1	HALLMARK_CHOLESTEROL_HOMEOSTASIS	HALLMARK_CHOLESTEROL_HOMEOSTASIS	66	-0.362054	-1.25271	0.138672	0.231683	171
1	GO_DNA_CATABOLIC_PROCESS	GO_DNA_CATABOLIC_PROCESS	23	-0.454432	-1.25221	0.179325	0.232215	172
1	GO_NEGATIVE_REGULATION_OF_CELLULAR_PROTEIN_CATABOLIC_PROCESS	GO_NEGATIVE_REGULATION_OF_CELLULAR_PROTEIN_CATABOLIC_PROCESS	53	-0.375429	-1.24781	0.1409	0.236668	173
1	GO_CELLULAR_MODIFIED_AMINO_ACID_METABOLIC_PROCESS	GO_CELLULAR_MODIFIED_AMINO_ACID_METABOLIC_PROCESS	149	-0.313705	-1.24782	0.0654867	0.236707	174
1	GO_REGULATION_OF_PHOSPHOLIPASE_ACTIVITY	GO_REGULATION_OF_PHOSPHOLIPASE_ACTIVITY	43	-0.391163	-1.24732	0.162162	0.237148	175
1	GO_HORMONE_METABOLIC_PROCESS	GO_HORMONE_METABOLIC_PROCESS	85	-0.343968	-1.24277	0.120983	0.242309	176
1	GO_REGULATION_OF_OXIDATIVE_STRESS_INDUCED_CELL_DEATH	GO_REGULATION_OF_OXIDATIVE_STRESS_INDUCED_CELL_DEATH	36	-0.404152	-1.24069	0.168856	0.244667	177
1	GO_CELLULAR_RESPONSE_TO_CARBOHYDRATE_STIMULUS	GO_CELLULAR_RESPONSE_TO_CARBOHYDRATE_STIMULUS	57	-0.361013	-1.23824	0.162109	0.246384	178
2	BIOCARTA_INFLAM_PATHWAY	BIOCARTA_INFLAM_PATHWAY	19	-0.852448	-2.27288	0	0	1
2	GO_CCR_CHEMOKINE_RECEPTOR_BINDING	GO_CCR_CHEMOKINE_RECEPTOR_BINDING	19	-0.870975	-2.29921	0	0	2
2	GO_CELLULAR_RESPONSE_TO_BIOTIC_STIMULUS	GO_CELLULAR_RESPONSE_TO_BIOTIC_STIMULUS	134	-0.587746	-2.30881	0	0	3
2	GO_CELLULAR_RESPONSE_TO_CYTOKINE_STIMULUS	GO_CELLULAR_RESPONSE_TO_CYTOKINE_STIMULUS	431	-0.651927	-2.90391	0	0	4
2	GO_CELLULAR_RESPONSE_TO_INTERFERON_GAMMA	GO_CELLULAR_RESPONSE_TO_INTERFERON_GAMMA	93	-0.783994	-2.93037	0	0	5
2	GO_CELLULAR_RESPONSE_TO_INTERLEUKIN_1	GO_CELLULAR_RESPONSE_TO_INTERLEUKIN_1	63	-0.678941	-2.35435	0	0	6
2	GO_CHEMOKINE_ACTIVITY	GO_CHEMOKINE_ACTIVITY	28	-0.864441	-2.53895	0	0	7
2	GO_CHEMOKINE_MEDIATED_SIGNALING_PATHWAY	GO_CHEMOKINE_MEDIATED_SIGNALING_PATHWAY	38	-0.788249	-2.41775	0	0	8
2	GO_CHEMOKINE_RECEPTOR_BINDING	GO_CHEMOKINE_RECEPTOR_BINDING	35	-0.842961	-2.64895	0	0	9
2	GO_CYTOKINE_ACTIVITY	GO_CYTOKINE_ACTIVITY	114	-0.716012	-2.74776	0	0	10
2	GO_CYTOKINE_MEDIATED_SIGNALING_PATHWAY	GO_CYTOKINE_MEDIATED_SIGNALING_PATHWAY	316	-0.696854	-3.02671	0	0	11
2	GO_CYTOKINE_RECEPTOR_BINDING	GO_CYTOKINE_RECEPTOR_BINDING	171	-0.62327	-2.5303	0	0	12
2	GO_DEFENSE_RESPONSE_TO_OTHER_ORGANISM	GO_DEFENSE_RESPONSE_TO_OTHER_ORGANISM	297	-0.61151	-2.64317	0	0	13
2	GO_DEFENSE_RESPONSE_TO_VIRUS	GO_DEFENSE_RESPONSE_TO_VIRUS	120	-0.75278	-2.93842	0	0	14
2	GO_EXTERNAL_SIDE_OF_PLASMA_MEMBRANE	GO_EXTERNAL_SIDE_OF_PLASMA_MEMBRANE	137	-0.614837	-2.40849	0	0	15
2	GO_G_PROTEIN_COUPLED_RECEPTOR_BINDING	GO_G_PROTEIN_COUPLED_RECEPTOR_BINDING	138	-0.591496	-2.30611	0	0	16
2	GO_I_KAPPAB_KINASE_NF_KAPPAB_SIGNALING	GO_I_KAPPAB_KINASE_NF_KAPPAB_SIGNALING	60	-0.678932	-2.31501	0	0	17
2	GO_IMMUNE_EFFECTOR_PROCESS	GO_IMMUNE_EFFECTOR_PROCESS	336	-0.603168	-2.62921	0	0	18
2	GO_INFLAMMATORY_RESPONSE	GO_INFLAMMATORY_RESPONSE	291	-0.613827	-2.6162	0	0	19
2	GO_INNATE_IMMUNE_RESPONSE	GO_INNATE_IMMUNE_RESPONSE	388	-0.625557	-2.74827	0	0	20
2	GO_INTERFERON_GAMMA_MEDIATED_SIGNALING_PATHWAY	GO_INTERFERON_GAMMA_MEDIATED_SIGNALING_PATHWAY	62	-0.753792	-2.62973	0	0	21
2	GO_LYMPHOCYTE_CHEMOTAXIS	GO_LYMPHOCYTE_CHEMOTAXIS	22	-0.829518	-2.31987	0	0	22
2	GO_LYMPHOCYTE_MIGRATION	GO_LYMPHOCYTE_MIGRATION	28	-0.809673	-2.41167	0	0	23
2	GO_NEGATIVE_REGULATION_OF_DEFENSE_RESPONSE	GO_NEGATIVE_REGULATION_OF_DEFENSE_RESPONSE	105	-0.622519	-2.33328	0	0	24
2	GO_NEGATIVE_REGULATION_OF_EXTRINSIC_APOPTOTIC_SIGNALING_PATHWAY	GO_NEGATIVE_REGULATION_OF_EXTRINSIC_APOPTOTIC_SIGNALING_PATHWAY	76	-0.65295	-2.33426	0	0	25
2	GO_NEGATIVE_REGULATION_OF_MULTI_ORGANISM_PROCESS	GO_NEGATIVE_REGULATION_OF_MULTI_ORGANISM_PROCESS	106	-0.730395	-2.81357	0	0	26
2	GO_NEGATIVE_REGULATION_OF_TYPE_I_INTERFERON_PRODUCTION	GO_NEGATIVE_REGULATION_OF_TYPE_I_INTERFERON_PRODUCTION	31	-0.791421	-2.36284	0	0	27
2	GO_NEGATIVE_REGULATION_OF_VIRAL_GENOME_REPLICATION	GO_NEGATIVE_REGULATION_OF_VIRAL_GENOME_REPLICATION	38	-0.826363	-2.58824	0	0	28
2	GO_NEGATIVE_REGULATION_OF_VIRAL_PROCESS	GO_NEGATIVE_REGULATION_OF_VIRAL_PROCESS	67	-0.781121	-2.72482	0	0	29
2	GO_POSITIVE_REGULATION_OF_CELL_ACTIVATION	GO_POSITIVE_REGULATION_OF_CELL_ACTIVATION	214	-0.562536	-2.34855	0	0	30
2	GO_POSITIVE_REGULATION_OF_CYTOKINE_BIOSYNTHETIC_PROCESS	GO_POSITIVE_REGULATION_OF_CYTOKINE_BIOSYNTHETIC_PROCESS	45	-0.737113	-2.42667	0	0	31
2	GO_POSITIVE_REGULATION_OF_CYTOKINE_PRODUCTION	GO_POSITIVE_REGULATION_OF_CYTOKINE_PRODUCTION	265	-0.593918	-2.50947	0	0	32
2	GO_POSITIVE_REGULATION_OF_DEFENSE_RESPONSE	GO_POSITIVE_REGULATION_OF_DEFENSE_RESPONSE	271	-0.591486	-2.51998	0	0	33
2	GO_POSITIVE_REGULATION_OF_EXTRINSIC_APOPTOTIC_SIGNALING_PATHWAY	GO_POSITIVE_REGULATION_OF_EXTRINSIC_APOPTOTIC_SIGNALING_PATHWAY	45	-0.720458	-2.31151	0	0	34
2	GO_POSITIVE_REGULATION_OF_I_KAPPAB_KINASE_NF_KAPPAB_SIGNALING	GO_POSITIVE_REGULATION_OF_I_KAPPAB_KINASE_NF_KAPPAB_SIGNALING	144	-0.628211	-2.48598	0	0	35
2	GO_POSITIVE_REGULATION_OF_IMMUNE_RESPONSE	GO_POSITIVE_REGULATION_OF_IMMUNE_RESPONSE	404	-0.517711	-2.30555	0	0	36
2	GO_POSITIVE_REGULATION_OF_INFLAMMATORY_RESPONSE	GO_POSITIVE_REGULATION_OF_INFLAMMATORY_RESPONSE	71	-0.705448	-2.46189	0	0	37
2	GO_POSITIVE_REGULATION_OF_INNATE_IMMUNE_RESPONSE	GO_POSITIVE_REGULATION_OF_INNATE_IMMUNE_RESPONSE	203	-0.582359	-2.40644	0	0	38
2	GO_POSITIVE_REGULATION_OF_INTERFERON_GAMMA_PRODUCTION	GO_POSITIVE_REGULATION_OF_INTERFERON_GAMMA_PRODUCTION	46	-0.715432	-2.30065	0	0	39
2	GO_POSITIVE_REGULATION_OF_LEUKOCYTE_CHEMOTAXIS	GO_POSITIVE_REGULATION_OF_LEUKOCYTE_CHEMOTAXIS	57	-0.707419	-2.38548	0	0	40
2	GO_POSITIVE_REGULATION_OF_LEUKOCYTE_MIGRATION	GO_POSITIVE_REGULATION_OF_LEUKOCYTE_MIGRATION	75	-0.715561	-2.54855	0	0	41
2	GO_POSITIVE_REGULATION_OF_LEUKOCYTE_PROLIFERATION	GO_POSITIVE_REGULATION_OF_LEUKOCYTE_PROLIFERATION	98	-0.649778	-2.41162	0	0	42
2	GO_POSITIVE_REGULATION_OF_NF_KAPPAB_TRANSCRIPTION_FACTOR_ACTIVITY	GO_POSITIVE_REGULATION_OF_NF_KAPPAB_TRANSCRIPTION_FACTOR_ACTIVITY	102	-0.643406	-2.41849	0	0	43
2	GO_POSITIVE_REGULATION_OF_RESPONSE_TO_WOUNDING	GO_POSITIVE_REGULATION_OF_RESPONSE_TO_WOUNDING	103	-0.631323	-2.38972	0	0	44
2	GO_POSITIVE_REGULATION_OF_STAT_CASCADE	GO_POSITIVE_REGULATION_OF_STAT_CASCADE	49	-0.678852	-2.27136	0	0	45
2	GO_REGULATION_OF_CHEMOTAXIS	GO_REGULATION_OF_CHEMOTAXIS	121	-0.596783	-2.31001	0	0	46
2	GO_REGULATION_OF_CYTOKINE_BIOSYNTHETIC_PROCESS	GO_REGULATION_OF_CYTOKINE_BIOSYNTHETIC_PROCESS	71	-0.665045	-2.34092	0	0	47
2	GO_REGULATION_OF_CYTOKINE_PRODUCTION	GO_REGULATION_OF_CYTOKINE_PRODUCTION	398	-0.570483	-2.51306	0	0	48
2	GO_REGULATION_OF_EXTRINSIC_APOPTOTIC_SIGNALING_PATHWAY	GO_REGULATION_OF_EXTRINSIC_APOPTOTIC_SIGNALING_PATHWAY	122	-0.642167	-2.49712	0	0	49
2	GO_REGULATION_OF_EXTRINSIC_APOPTOTIC_SIGNALING_PATHWAY_IN_ABSENCE_OF_LIGAND	GO_REGULATION_OF_EXTRINSIC_APOPTOTIC_SIGNALING_PATHWAY_IN_ABSENCE_OF_LIGAND	35	-0.764735	-2.37583	0	0	50
2	GO_REGULATION_OF_GRANULOCYTE_CHEMOTAXIS	GO_REGULATION_OF_GRANULOCYTE_CHEMOTAXIS	28	-0.775881	-2.28715	0	0	51
2	GO_REGULATION_OF_I_KAPPAB_KINASE_NF_KAPPAB_SIGNALING	GO_REGULATION_OF_I_KAPPAB_KINASE_NF_KAPPAB_SIGNALING	188	-0.621294	-2.56316	0	0	52
2	GO_REGULATION_OF_IMMUNE_EFFECTOR_PROCESS	GO_REGULATION_OF_IMMUNE_EFFECTOR_PROCESS	294	-0.532478	-2.28675	0	0	53
2	GO_REGULATION_OF_INFLAMMATORY_RESPONSE	GO_REGULATION_OF_INFLAMMATORY_RESPONSE	192	-0.623744	-2.56153	0	0	54
2	GO_REGULATION_OF_INNATE_IMMUNE_RESPONSE	GO_REGULATION_OF_INNATE_IMMUNE_RESPONSE	280	-0.601466	-2.56827	0	0	55
2	GO_REGULATION_OF_INTERFERON_GAMMA_PRODUCTION	GO_REGULATION_OF_INTERFERON_GAMMA_PRODUCTION	68	-0.701519	-2.48589	0	0	56
2	GO_REGULATION_OF_INTERLEUKIN_1_BETA_PRODUCTION	GO_REGULATION_OF_INTERLEUKIN_1_BETA_PRODUCTION	30	-0.758939	-2.28001	0	0	57
2	GO_REGULATION_OF_INTERLEUKIN_1_PRODUCTION	GO_REGULATION_OF_INTERLEUKIN_1_PRODUCTION	38	-0.757914	-2.38706	0	0	58
2	GO_REGULATION_OF_INTERLEUKIN_12_PRODUCTION	GO_REGULATION_OF_INTERLEUKIN_12_PRODUCTION	41	-0.757902	-2.4037	0	0	59
2	GO_REGULATION_OF_LEUKOCYTE_CHEMOTAXIS	GO_REGULATION_OF_LEUKOCYTE_CHEMOTAXIS	70	-0.691147	-2.43005	0	0	60
2	GO_REGULATION_OF_LEUKOCYTE_MIGRATION	GO_REGULATION_OF_LEUKOCYTE_MIGRATION	107	-0.658401	-2.51339	0	0	61
2	GO_REGULATION_OF_LEUKOCYTE_PROLIFERATION	GO_REGULATION_OF_LEUKOCYTE_PROLIFERATION	148	-0.581076	-2.31735	0	0	62
2	GO_REGULATION_OF_NECROTIC_CELL_DEATH	GO_REGULATION_OF_NECROTIC_CELL_DEATH	22	-0.825678	-2.30139	0	0	63
2	GO_REGULATION_OF_NF_KAPPAB_IMPORT_INTO_NUCLEUS	GO_REGULATION_OF_NF_KAPPAB_IMPORT_INTO_NUCLEUS	41	-0.754549	-2.39724	0	0	64
2	GO_REGULATION_OF_RESPONSE_TO_CYTOKINE_STIMULUS	GO_REGULATION_OF_RESPONSE_TO_CYTOKINE_STIMULUS	112	-0.622704	-2.3475	0	0	65
2	GO_REGULATION_OF_T_CELL_DIFFERENTIATION	GO_REGULATION_OF_T_CELL_DIFFERENTIATION	74	-0.658884	-2.35564	0	0	66
2	GO_REGULATION_OF_T_CELL_PROLIFERATION	GO_REGULATION_OF_T_CELL_PROLIFERATION	105	-0.59507	-2.27489	0	0	67
2	GO_REGULATION_OF_T_HELPER_CELL_DIFFERENTIATION	GO_REGULATION_OF_T_HELPER_CELL_DIFFERENTIATION	20	-0.828503	-2.27657	0	0	68
2	GO_REGULATION_OF_TYPE_I_INTERFERON_PRODUCTION	GO_REGULATION_OF_TYPE_I_INTERFERON_PRODUCTION	95	-0.641141	-2.39477	0	0	69
2	GO_REGULATION_OF_VIRAL_GENOME_REPLICATION	GO_REGULATION_OF_VIRAL_GENOME_REPLICATION	63	-0.737926	-2.5448	0	0	70
2	GO_RESPONSE_TO_BACTERIUM	GO_RESPONSE_TO_BACTERIUM	330	-0.574059	-2.52255	0	0	71
2	GO_RESPONSE_TO_INTERFERON_GAMMA	GO_RESPONSE_TO_INTERFERON_GAMMA	109	-0.780523	-2.93429	0	0	72
2	GO_RESPONSE_TO_INTERLEUKIN_1	GO_RESPONSE_TO_INTERLEUKIN_1	86	-0.663059	-2.41385	0	0	73
2	GO_RESPONSE_TO_MOLECULE_OF_BACTERIAL_ORIGIN	GO_RESPONSE_TO_MOLECULE_OF_BACTERIAL_ORIGIN	243	-0.589098	-2.48606	0	0	74
2	GO_RESPONSE_TO_TUMOR_NECROSIS_FACTOR	GO_RESPONSE_TO_TUMOR_NECROSIS_FACTOR	172	-0.650928	-2.65581	0	0	75
2	GO_RESPONSE_TO_TYPE_I_INTERFERON	GO_RESPONSE_TO_TYPE_I_INTERFERON	53	-0.792547	-2.60502	0	0	76
2	GO_RESPONSE_TO_VIRUS	GO_RESPONSE_TO_VIRUS	186	-0.698414	-2.85618	0	0	77
2	GO_TUMOR_NECROSIS_FACTOR_MEDIATED_SIGNALING_PATHWAY	GO_TUMOR_NECROSIS_FACTOR_MEDIATED_SIGNALING_PATHWAY	93	-0.642738	-2.33196	0	0	78
2	HALLMARK_ALLOGRAFT_REJECTION	HALLMARK_ALLOGRAFT_REJECTION	162	-0.637226	-2.55796	0	0	79
2	HALLMARK_COMPLEMENT	HALLMARK_COMPLEMENT	166	-0.616728	-2.45068	0	0	80
2	HALLMARK_IL2_STAT5_SIGNALING	HALLMARK_IL2_STAT5_SIGNALING	160	-0.57292	-2.28522	0	0	81
2	HALLMARK_IL6_JAK_STAT3_SIGNALING	HALLMARK_IL6_JAK_STAT3_SIGNALING	73	-0.760892	-2.73356	0	0	82
2	HALLMARK_INFLAMMATORY_RESPONSE	HALLMARK_INFLAMMATORY_RESPONSE	167	-0.764752	-3.08971	0	0	83
2	HALLMARK_INTERFERON_ALPHA_RESPONSE	HALLMARK_INTERFERON_ALPHA_RESPONSE	87	-0.889436	-3.20929	0	0	84
2	HALLMARK_INTERFERON_GAMMA_RESPONSE	HALLMARK_INTERFERON_GAMMA_RESPONSE	182	-0.86442	-3.54965	0	0	85
2	HALLMARK_TNFA_SIGNALING_VIA_NFKB	HALLMARK_TNFA_SIGNALING_VIA_NFKB	181	-0.729143	-2.96653	0	0	86
2	KEGG_CYTOKINE_CYTOKINE_RECEPTOR_INTERACTION	KEGG_CYTOKINE_CYTOKINE_RECEPTOR_INTERACTION	155	-0.697267	-2.7641	0	0	87
2	KEGG_CYTOSOLIC_DNA_SENSING_PATHWAY	KEGG_CYTOSOLIC_DNA_SENSING_PATHWAY	40	-0.742491	-2.37916	0	0	88
2	KEGG_NOD_LIKE_RECEPTOR_SIGNALING_PATHWAY	KEGG_NOD_LIKE_RECEPTOR_SIGNALING_PATHWAY	45	-0.762094	-2.49478	0	0	89
2	KEGG_RIG_I_LIKE_RECEPTOR_SIGNALING_PATHWAY	KEGG_RIG_I_LIKE_RECEPTOR_SIGNALING_PATHWAY	49	-0.756986	-2.49406	0	0	90
2	KEGG_TOLL_LIKE_RECEPTOR_SIGNALING_PATHWAY	KEGG_TOLL_LIKE_RECEPTOR_SIGNALING_PATHWAY	84	-0.624856	-2.28108	0	0	91
2	GO_REGULATION_OF_CYTOKINE_SECRETION	GO_REGULATION_OF_CYTOKINE_SECRETION	100	-0.598587	-2.24364	0	2.19477e-06	92
2	GO_REGULATION_OF_ADAPTIVE_IMMUNE_RESPONSE	GO_REGULATION_OF_ADAPTIVE_IMMUNE_RESPONSE	91	-0.609866	-2.25081	0	2.24413e-06	93
2	GO_REGULATION_OF_LYMPHOCYTE_DIFFERENTIATION	GO_REGULATION_OF_LYMPHOCYTE_DIFFERENTIATION	94	-0.60822	-2.2523	0	2.26371e-06	94
2	GO_ACTIVATION_OF_INNATE_IMMUNE_RESPONSE	GO_ACTIVATION_OF_INNATE_IMMUNE_RESPONSE	173	-0.560088	-2.25532	0	2.27963e-06	95
2	GO_POSITIVE_REGULATION_OF_INTERLEUKIN_12_PRODUCTION	GO_POSITIVE_REGULATION_OF_INTERLEUKIN_12_PRODUCTION	26	-0.771273	-2.25959	0	2.28767e-06	96
2	GO_MONOCYTE_CHEMOTAXIS	GO_MONOCYTE_CHEMOTAXIS	25	-0.795686	-2.26095	0	2.30392e-06	97
2	GO_RESPONSE_TO_PROTOZOAN	GO_RESPONSE_TO_PROTOZOAN	18	-0.866216	-2.26366	0	2.31214e-06	98
2	GO_POSITIVE_REGULATION_OF_CHEMOTAXIS	GO_POSITIVE_REGULATION_OF_CHEMOTAXIS	82	-0.631739	-2.26634	0	2.32457e-06	99
2	GO_REGULATION_OF_NEUTROPHIL_CHEMOTAXIS	GO_REGULATION_OF_NEUTROPHIL_CHEMOTAXIS	22	-0.798818	-2.26861	0	2.34135e-06	100
2	GO_RESPONSE_TO_INTERFERON_BETA	GO_RESPONSE_TO_INTERFERON_BETA	17	-0.850861	-2.21387	0	1.64816e-05	101
2	GO_REGULATION_OF_INTERFERON_BETA_PRODUCTION	GO_REGULATION_OF_INTERFERON_BETA_PRODUCTION	38	-0.689822	-2.19537	0	1.80832e-05	102
2	KEGG_CHEMOKINE_SIGNALING_PATHWAY	KEGG_CHEMOKINE_SIGNALING_PATHWAY	137	-0.563214	-2.20418	0	1.83103e-05	103
2	GO_POSITIVE_REGULATION_OF_IMMUNE_EFFECTOR_PROCESS	GO_POSITIVE_REGULATION_OF_IMMUNE_EFFECTOR_PROCESS	106	-0.584875	-2.20496	0	1.83391e-05	104
2	BIOCARTA_IL22BP_PATHWAY	BIOCARTA_IL22BP_PATHWAY	15	-0.887413	-2.21159	0	1.85138e-05	105
2	GO_REGULATION_OF_LYMPHOCYTE_APOPTOTIC_PROCESS	GO_REGULATION_OF_LYMPHOCYTE_APOPTOTIC_PROCESS	40	-0.688279	-2.19143	0	2.18754e-05	106
2	GO_REGULATION_OF_CELL_ACTIVATION	GO_REGULATION_OF_CELL_ACTIVATION	333	-0.50202	-2.19278	0	2.19427e-05	107
2	GO_REGULATION_OF_TYROSINE_PHOSPHORYLATION_OF_STAT_PROTEIN	GO_REGULATION_OF_TYROSINE_PHOSPHORYLATION_OF_STAT_PROTEIN	46	-0.668692	-2.19329	0	2.19765e-05	108
2	GO_POSITIVE_REGULATION_OF_T_CELL_PROLIFERATION	GO_POSITIVE_REGULATION_OF_T_CELL_PROLIFERATION	69	-0.625188	-2.18458	0	2.55938e-05	109
2	GO_POSITIVE_REGULATION_OF_INTERLEUKIN_6_PRODUCTION	GO_POSITIVE_REGULATION_OF_INTERLEUKIN_6_PRODUCTION	48	-0.67202	-2.17161	0	3.24743e-05	110
2	GO_POSITIVE_REGULATION_OF_NEUTROPHIL_MIGRATION	GO_POSITIVE_REGULATION_OF_NEUTROPHIL_MIGRATION	21	-0.790261	-2.16345	0	3.35279e-05	111
2	GO_GRANULOCYTE_MIGRATION	GO_GRANULOCYTE_MIGRATION	51	-0.63279	-2.16479	0	3.3722e-05	112
2	GO_REGULATION_OF_VIRAL_ENTRY_INTO_HOST_CELL	GO_REGULATION_OF_VIRAL_ENTRY_INTO_HOST_CELL	22	-0.792359	-2.16481	0	3.37708e-05	113
2	GO_REGULATION_OF_NEUTROPHIL_MIGRATION	GO_REGULATION_OF_NEUTROPHIL_MIGRATION	25	-0.766894	-2.16551	0	3.3869e-05	114
2	GO_REGULATION_OF_CD4_POSITIVE_ALPHA_BETA_T_CELL_ACTIVATION	GO_REGULATION_OF_CD4_POSITIVE_ALPHA_BETA_T_CELL_ACTIVATION	29	-0.744438	-2.16578	0	3.39677e-05	115
2	GO_PATTERN_RECOGNITION_RECEPTOR_SIGNALING_PATHWAY	GO_PATTERN_RECOGNITION_RECEPTOR_SIGNALING_PATHWAY	91	-0.583508	-2.15974	0	3.68436e-05	116
2	GO_RESPONSE_TO_INTERFERON_ALPHA	GO_RESPONSE_TO_INTERFERON_ALPHA	18	-0.816671	-2.15323	0	4.18645e-05	117
2	GO_REGULATION_OF_STAT_CASCADE	GO_REGULATION_OF_STAT_CASCADE	82	-0.597274	-2.14629	0	5.23167e-05	118
2	GO_INTERACTION_WITH_HOST	GO_INTERACTION_WITH_HOST	114	-0.562193	-2.14696	0	5.23898e-05	119
2	BIOCARTA_IL10_PATHWAY	BIOCARTA_IL10_PATHWAY	17	-0.828339	-2.14077	0	5.86432e-05	120
2	GO_ZYMOGEN_ACTIVATION	GO_ZYMOGEN_ACTIVATION	85	-0.586505	-2.14186	0	5.87239e-05	121
2	GO_REGULATION_OF_INTERLEUKIN_1_SECRETION	GO_REGULATION_OF_INTERLEUKIN_1_SECRETION	21	-0.787001	-2.13743	0	6.02175e-05	122
2	GO_POSITIVE_REGULATION_OF_INTERLEUKIN_1_PRODUCTION	GO_POSITIVE_REGULATION_OF_INTERLEUKIN_1_PRODUCTION	22	-0.781944	-2.1301	0	6.99898e-05	123
2	GO_NEGATIVE_REGULATION_OF_EXTRINSIC_APOPTOTIC_SIGNALING_PATHWAY_VIA_DEATH_DOMAIN_RECEPTORS	GO_NEGATIVE_REGULATION_OF_EXTRINSIC_APOPTOTIC_SIGNALING_PATHWAY_VIA_DEATH_DOMAIN_RECEPTORS	27	-0.726633	-2.12901	0	7.46724e-05	124
2	GO_POSITIVE_REGULATION_OF_INTERLEUKIN_8_PRODUCTION	GO_POSITIVE_REGULATION_OF_INTERLEUKIN_8_PRODUCTION	31	-0.712846	-2.12929	0	7.47727e-05	125
2	GO_POSITIVE_REGULATION_OF_INTERFERON_BETA_PRODUCTION	GO_POSITIVE_REGULATION_OF_INTERFERON_BETA_PRODUCTION	28	-0.708405	-2.12508	0	8.10669e-05	126
2	GO_MYD88_INDEPENDENT_TOLL_LIKE_RECEPTOR_SIGNALING_PATHWAY	GO_MYD88_INDEPENDENT_TOLL_LIKE_RECEPTOR_SIGNALING_PATHWAY	30	-0.725601	-2.12468	0	8.27175e-05	127
2	GO_REGULATION_OF_T_CELL_MIGRATION	GO_REGULATION_OF_T_CELL_MIGRATION	19	-0.769358	-2.12279	0	8.76526e-05	128
2	GO_POSITIVE_REGULATION_OF_LYMPHOCYTE_MIGRATION	GO_POSITIVE_REGULATION_OF_LYMPHOCYTE_MIGRATION	19	-0.792392	-2.12212	0	8.92709e-05	129
2	BIOCARTA_TNFR2_PATHWAY	BIOCARTA_TNFR2_PATHWAY	16	-0.79364	-2.12049	0	9.06037e-05	130
2	BIOCARTA_HIVNEF_PATHWAY	BIOCARTA_HIVNEF_PATHWAY	54	-0.632999	-2.12087	0	9.07234e-05	131
2	GO_NEGATIVE_REGULATION_OF_INFLAMMATORY_RESPONSE	GO_NEGATIVE_REGULATION_OF_INFLAMMATORY_RESPONSE	67	-0.606639	-2.11601	0	9.83907e-05	132
2	GO_CYTOPLASMIC_PATTERN_RECOGNITION_RECEPTOR_SIGNALING_PATHWAY	GO_CYTOPLASMIC_PATTERN_RECOGNITION_RECEPTOR_SIGNALING_PATHWAY	26	-0.733717	-2.11274	0	0.000102244	133
2	GO_REGULATION_OF_LEUKOCYTE_APOPTOTIC_PROCESS	GO_REGULATION_OF_LEUKOCYTE_APOPTOTIC_PROCESS	62	-0.60951	-2.10945	0	0.000103384	134
2	GO_TUMOR_NECROSIS_FACTOR_RECEPTOR_SUPERFAMILY_BINDING	GO_TUMOR_NECROSIS_FACTOR_RECEPTOR_SUPERFAMILY_BINDING	38	-0.660788	-2.10699	0	0.000107727	135
2	GO_LEUKOCYTE_CELL_CELL_ADHESION	GO_LEUKOCYTE_CELL_CELL_ADHESION	193	-0.521368	-2.10544	0	0.000108404	136
2	GO_REGULATION_OF_ERK1_AND_ERK2_CASCADE	GO_REGULATION_OF_ERK1_AND_ERK2_CASCADE	149	-0.536653	-2.10621	0	0.000108956	137
2	GO_REGULATION_OF_TYPE_I_INTERFERON_MEDIATED_SIGNALING_PATHWAY	GO_REGULATION_OF_TYPE_I_INTERFERON_MEDIATED_SIGNALING_PATHWAY	24	-0.762839	-2.10659	0	0.000109234	138
2	GO_POSITIVE_REGULATION_OF_B_CELL_PROLIFERATION	GO_POSITIVE_REGULATION_OF_B_CELL_PROLIFERATION	25	-0.7321	-2.10518	0	0.000109922	139
2	GO_NEGATIVE_REGULATION_OF_IMMUNE_RESPONSE	GO_NEGATIVE_REGULATION_OF_IMMUNE_RESPONSE	92	-0.57477	-2.10348	0	0.000116176	140
2	GO_POSITIVE_REGULATION_OF_CYTOKINE_SECRETION	GO_POSITIVE_REGULATION_OF_CYTOKINE_SECRETION	65	-0.612906	-2.10169	0	0.000123644	141
2	GO_REGULATION_OF_LYMPHOCYTE_MIGRATION	GO_REGULATION_OF_LYMPHOCYTE_MIGRATION	29	-0.702528	-2.1005	0	0.00012822	142
2	GO_DENDRITIC_CELL_DIFFERENTIATION	GO_DENDRITIC_CELL_DIFFERENTIATION	24	-0.73761	-2.0975	0	0.000135458	143
2	GO_POSITIVE_REGULATION_OF_LYMPHOCYTE_DIFFERENTIATION	GO_POSITIVE_REGULATION_OF_LYMPHOCYTE_DIFFERENTIATION	59	-0.608863	-2.08879	0	0.000172864	144
2	GO_REGULATION_OF_CYTOKINE_PRODUCTION_INVOLVED_IN_IMMUNE_RESPONSE	GO_REGULATION_OF_CYTOKINE_PRODUCTION_INVOLVED_IN_IMMUNE_RESPONSE	40	-0.65251	-2.08771	0	0.00017562	145
2	GO_NEGATIVE_REGULATION_OF_CYTOKINE_PRODUCTION	GO_NEGATIVE_REGULATION_OF_CYTOKINE_PRODUCTION	142	-0.535698	-2.08609	0	0.000183328	146
2	GO_LEUKOCYTE_CHEMOTAXIS	GO_LEUKOCYTE_CHEMOTAXIS	79	-0.57656	-2.08535	0	0.00018939	147
2	GO_STAT_CASCADE	GO_STAT_CASCADE	39	-0.664753	-2.08318	0	0.000191379	148
2	BIOCARTA_NFKB_PATHWAY	BIOCARTA_NFKB_PATHWAY	22	-0.751537	-2.07697	0	0.000206403	149
2	GO_REGULATION_OF_HEMOPOIESIS	GO_REGULATION_OF_HEMOPOIESIS	215	-0.498629	-2.07703	0	0.00020665	150
2	GO_LEUKOCYTE_MEDIATED_IMMUNITY	GO_LEUKOCYTE_MEDIATED_IMMUNITY	111	-0.544933	-2.07619	0	0.000210278	151
2	GO_POSITIVE_REGULATION_OF_TYPE_I_INTERFERON_PRODUCTION	GO_POSITIVE_REGULATION_OF_TYPE_I_INTERFERON_PRODUCTION	62	-0.593416	-2.07648	0	0.000210529	152
2	GO_REGULATION_OF_CHEMOKINE_PRODUCTION	GO_REGULATION_OF_CHEMOKINE_PRODUCTION	47	-0.635297	-2.07218	0	0.000225086	153
2	GO_REGULATION_OF_PRODUCTION_OF_MOLECULAR_MEDIATOR_OF_IMMUNE_RESPONSE	GO_REGULATION_OF_PRODUCTION_OF_MOLECULAR_MEDIATOR_OF_IMMUNE_RESPONSE	66	-0.595689	-2.06549	0	0.000250908	154
2	GO_POSITIVE_REGULATION_OF_INTERLEUKIN_1_BETA_PRODUCTION	GO_POSITIVE_REGULATION_OF_INTERLEUKIN_1_BETA_PRODUCTION	18	-0.790125	-2.06383	0	0.0002597	155
2	GO_REGULATION_OF_ACTIVATED_T_CELL_PROLIFERATION	GO_REGULATION_OF_ACTIVATED_T_CELL_PROLIFERATION	28	-0.716353	-2.06262	0	0.000261783	156
2	GO_MYELOID_LEUKOCYTE_MIGRATION	GO_MYELOID_LEUKOCYTE_MIGRATION	67	-0.587361	-2.05919	0	0.000280696	157
2	GO_REGULATION_OF_INTERLEUKIN_8_PRODUCTION	GO_REGULATION_OF_INTERLEUKIN_8_PRODUCTION	43	-0.636542	-2.05278	0	0.000314213	158
2	GO_CELL_CHEMOTAXIS	GO_CELL_CHEMOTAXIS	116	-0.530777	-2.04964	0	0.000322752	159
2	GO_REGULATION_OF_LEUKOCYTE_MEDIATED_IMMUNITY	GO_REGULATION_OF_LEUKOCYTE_MEDIATED_IMMUNITY	110	-0.532163	-2.0497	0	0.00032312	160
2	GO_ACTIVATION_OF_IMMUNE_RESPONSE	GO_ACTIVATION_OF_IMMUNE_RESPONSE	313	-0.469231	-2.0491	0	0.000326826	161
2	GO_POSITIVE_REGULATION_OF_NF_KAPPAB_IMPORT_INTO_NUCLEUS	GO_POSITIVE_REGULATION_OF_NF_KAPPAB_IMPORT_INTO_NUCLEUS	23	-0.744003	-2.04795	0	0.000331956	162
2	GO_POSITIVE_REGULATION_OF_CHEMOKINE_PRODUCTION	GO_POSITIVE_REGULATION_OF_CHEMOKINE_PRODUCTION	38	-0.654744	-2.04688	0	0.00033305	163
2	GO_REGULATION_OF_LEUKOCYTE_DIFFERENTIATION	GO_REGULATION_OF_LEUKOCYTE_DIFFERENTIATION	166	-0.513707	-2.04583	0	0.000334861	164
2	GO_POSITIVE_REGULATION_OF_CD4_POSITIVE_ALPHA_BETA_T_CELL_ACTIVATION	GO_POSITIVE_REGULATION_OF_CD4_POSITIVE_ALPHA_BETA_T_CELL_ACTIVATION	21	-0.756286	-2.03641	0	0.00036378	165
2	GO_POSITIVE_REGULATION_OF_PRODUCTION_OF_MOLECULAR_MEDIATOR_OF_IMMUNE_RESPONSE	GO_POSITIVE_REGULATION_OF_PRODUCTION_OF_MOLECULAR_MEDIATOR_OF_IMMUNE_RESPONSE	42	-0.632626	-2.03098	0	0.000385991	166
2	GO_REGULATION_OF_B_CELL_PROLIFERATION	GO_REGULATION_OF_B_CELL_PROLIFERATION	40	-0.631954	-2.03103	0	0.000386414	167
2	GO_LIPOPOLYSACCHARIDE_MEDIATED_SIGNALING_PATHWAY	GO_LIPOPOLYSACCHARIDE_MEDIATED_SIGNALING_PATHWAY	28	-0.693359	-2.02988	0	0.000390405	168
2	GO_ADAPTIVE_IMMUNE_RESPONSE_BASED_ON_SOMATIC_RECOMBINATION_OF_IMMUNE_RECEPTORS_BUILT_FROM_IMMUNOGLOBULIN_SUPERFAMILY_DOMAINS	GO_ADAPTIVE_IMMUNE_RESPONSE_BASED_ON_SOMATIC_RECOMBINATION_OF_IMMUNE_RECEPTORS_BUILT_FROM_IMMUNOGLOBULIN_SUPERFAMILY_DOMAINS	97	-0.546653	-2.02998	0	0.000390831	169
2	GO_ALPHA_BETA_T_CELL_ACTIVATION	GO_ALPHA_BETA_T_CELL_ACTIVATION	41	-0.639356	-2.02845	0	0.000396775	170
2	GO_REGULATION_OF_T_HELPER_1_TYPE_IMMUNE_RESPONSE	GO_REGULATION_OF_T_HELPER_1_TYPE_IMMUNE_RESPONSE	18	-0.779003	-2.02884	0	0.000397206	171
2	GO_CYTOKINE_RECEPTOR_ACTIVITY	GO_CYTOKINE_RECEPTOR_ACTIVITY	54	-0.599884	-2.02505	0	0.000424987	172
2	GO_REGULATION_OF_TUMOR_NECROSIS_FACTOR_SUPERFAMILY_CYTOKINE_PRODUCTION	GO_REGULATION_OF_TUMOR_NECROSIS_FACTOR_SUPERFAMILY_CYTOKINE_PRODUCTION	78	-0.565037	-2.02074	0	0.000461434	173
2	GO_REGULATION_OF_INTERFERON_ALPHA_PRODUCTION	GO_REGULATION_OF_INTERFERON_ALPHA_PRODUCTION	17	-0.774615	-2.01982	0	0.000469636	174
2	GO_POSITIVE_REGULATION_OF_LEUKOCYTE_APOPTOTIC_PROCESS	GO_POSITIVE_REGULATION_OF_LEUKOCYTE_APOPTOTIC_PROCESS	21	-0.738257	-2.0194	0	0.000474162	175
2	KEGG_HEMATOPOIETIC_CELL_LINEAGE	KEGG_HEMATOPOIETIC_CELL_LINEAGE	57	-0.591863	-2.01875	0	0.000478142	176
2	GO_REGULATION_OF_T_CELL_APOPTOTIC_PROCESS	GO_REGULATION_OF_T_CELL_APOPTOTIC_PROCESS	21	-0.733355	-2.01815	0	0.000488138	177
2	GO_REGULATION_OF_ALPHA_BETA_T_CELL_DIFFERENTIATION	GO_REGULATION_OF_ALPHA_BETA_T_CELL_DIFFERENTIATION	35	-0.663979	-2.01728	0	0.000492532	178
2	GO_NEGATIVE_REGULATION_OF_IMMUNE_SYSTEM_PROCESS	GO_NEGATIVE_REGULATION_OF_IMMUNE_SYSTEM_PROCESS	272	-0.477943	-2.017	0	0.000496104	179
2	GO_REGULATION_OF_T_CELL_MEDIATED_IMMUNITY	GO_REGULATION_OF_T_CELL_MEDIATED_IMMUNITY	35	-0.641634	-2.00953	0	0.000547576	180
2	GO_NEGATIVE_REGULATION_OF_IMMUNE_EFFECTOR_PROCESS	GO_NEGATIVE_REGULATION_OF_IMMUNE_EFFECTOR_PROCESS	79	-0.562771	-2.0059	0	0.000586423	181
2	KEGG_GRAFT_VERSUS_HOST_DISEASE	KEGG_GRAFT_VERSUS_HOST_DISEASE	29	-0.674239	-2.00603	0	0.000587027	182
2	GO_POSITIVE_REGULATION_OF_ADAPTIVE_IMMUNE_RESPONSE	GO_POSITIVE_REGULATION_OF_ADAPTIVE_IMMUNE_RESPONSE	55	-0.601685	-2.00452	0	0.000598496	183
2	KEGG_ALLOGRAFT_REJECTION	KEGG_ALLOGRAFT_REJECTION	29	-0.676432	-2.00311	0.00187617	0.000602626	184
2	GO_MYELOID_DENDRITIC_CELL_DIFFERENTIATION	GO_MYELOID_DENDRITIC_CELL_DIFFERENTIATION	15	-0.773064	-2.0009	0	0.00061924	185
2	GO_MYELOID_LEUKOCYTE_ACTIVATION	GO_MYELOID_LEUKOCYTE_ACTIVATION	68	-0.580506	-2.00067	0	0.000619919	186
2	KEGG_INTESTINAL_IMMUNE_NETWORK_FOR_IGA_PRODUCTION	KEGG_INTESTINAL_IMMUNE_NETWORK_FOR_IGA_PRODUCTION	32	-0.661733	-1.99643	0	0.00066644	187
2	GO_LYMPHOCYTE_MEDIATED_IMMUNITY	GO_LYMPHOCYTE_MEDIATED_IMMUNITY	83	-0.55349	-1.99575	0	0.000670929	188
2	GO_REGULATION_OF_B_CELL_ACTIVATION	GO_REGULATION_OF_B_CELL_ACTIVATION	82	-0.550832	-1.99262	0	0.000705209	189
2	GO_REGULATION_OF_EPITHELIAL_CELL_APOPTOTIC_PROCESS	GO_REGULATION_OF_EPITHELIAL_CELL_APOPTOTIC_PROCESS	35	-0.640445	-1.98973	0	0.000739973	190
2	GO_POSITIVE_REGULATION_OF_PEPTIDASE_ACTIVITY	GO_POSITIVE_REGULATION_OF_PEPTIDASE_ACTIVITY	114	-0.519908	-1.98671	0	0.000783466	191
2	GO_REGULATION_OF_TOLL_LIKE_RECEPTOR_SIGNALING_PATHWAY	GO_REGULATION_OF_TOLL_LIKE_RECEPTOR_SIGNALING_PATHWAY	36	-0.651479	-1.97978	0	0.000845813	192
2	GO_NEGATIVE_REGULATION_OF_VIRAL_ENTRY_INTO_HOST_CELL	GO_NEGATIVE_REGULATION_OF_VIRAL_ENTRY_INTO_HOST_CELL	15	-0.789969	-1.97762	0	0.000872792	193
2	GO_REGULATION_OF_ALPHA_BETA_T_CELL_ACTIVATION	GO_REGULATION_OF_ALPHA_BETA_T_CELL_ACTIVATION	52	-0.612542	-1.97405	0	0.000926495	194
2	GO_REGULATION_OF_DEFENSE_RESPONSE_TO_VIRUS	GO_REGULATION_OF_DEFENSE_RESPONSE_TO_VIRUS	136	-0.504512	-1.97394	0	0.000926843	195
2	GO_REGULATION_OF_INTERLEUKIN_6_PRODUCTION	GO_REGULATION_OF_INTERLEUKIN_6_PRODUCTION	74	-0.555164	-1.96716	0	0.00101791	196
2	KEGG_AUTOIMMUNE_THYROID_DISEASE	KEGG_AUTOIMMUNE_THYROID_DISEASE	31	-0.644661	-1.96585	0	0.00103108	197
2	GO_DEFENSE_RESPONSE_TO_BACTERIUM	GO_DEFENSE_RESPONSE_TO_BACTERIUM	108	-0.52439	-1.96472	0	0.00104147	198
2	BIOCARTA_IL1R_PATHWAY	BIOCARTA_IL1R_PATHWAY	29	-0.666991	-1.95994	0.00209205	0.00110227	199
2	GO_NEGATIVE_REGULATION_OF_I_KAPPAB_KINASE_NF_KAPPAB_SIGNALING	GO_NEGATIVE_REGULATION_OF_I_KAPPAB_KINASE_NF_KAPPAB_SIGNALING	40	-0.62596	-1.95887	0	0.00111834	200
2	GO_POSITIVE_REGULATION_OF_HEMOPOIESIS	GO_POSITIVE_REGULATION_OF_HEMOPOIESIS	117	-0.511292	-1.95831	0	0.00112478	201
2	GO_REGULATION_OF_LYMPHOCYTE_MEDIATED_IMMUNITY	GO_REGULATION_OF_LYMPHOCYTE_MEDIATED_IMMUNITY	78	-0.548933	-1.9552	0	0.00117444	202
2	GO_ALPHA_BETA_T_CELL_DIFFERENTIATION	GO_ALPHA_BETA_T_CELL_DIFFERENTIATION	34	-0.626874	-1.9532	0	0.00120386	203
2	GO_LEUKOCYTE_ACTIVATION	GO_LEUKOCYTE_ACTIVATION	305	-0.452974	-1.95048	0	0.00124629	204
2	GO_REGULATION_OF_ANTIGEN_PROCESSING_AND_PRESENTATION	GO_REGULATION_OF_ANTIGEN_PROCESSING_AND_PRESENTATION	17	-0.745129	-1.94309	0.00215054	0.00136486	205
2	GO_CYTOKINE_PRODUCTION	GO_CYTOKINE_PRODUCTION	87	-0.52531	-1.93837	0	0.00146025	206
2	GO_NIK_NF_KAPPAB_SIGNALING	GO_NIK_NF_KAPPAB_SIGNALING	75	-0.5375	-1.9349	0	0.00153895	207
2	GO_MYELOID_DENDRITIC_CELL_ACTIVATION	GO_MYELOID_DENDRITIC_CELL_ACTIVATION	19	-0.716298	-1.93466	0	0.0015422	208
2	GO_TOLL_LIKE_RECEPTOR_SIGNALING_PATHWAY	GO_TOLL_LIKE_RECEPTOR_SIGNALING_PATHWAY	73	-0.544867	-1.93323	0	0.00156093	209
2	GO_NEGATIVE_REGULATION_OF_NF_KAPPAB_IMPORT_INTO_NUCLEUS	GO_NEGATIVE_REGULATION_OF_NF_KAPPAB_IMPORT_INTO_NUCLEUS	15	-0.786292	-1.93243	0	0.00158015	210
2	GO_NEGATIVE_REGULATION_OF_RESPONSE_TO_EXTERNAL_STIMULUS	GO_NEGATIVE_REGULATION_OF_RESPONSE_TO_EXTERNAL_STIMULUS	179	-0.478441	-1.92764	0	0.00168315	211
2	KEGG_LEISHMANIA_INFECTION	KEGG_LEISHMANIA_INFECTION	58	-0.562691	-1.92511	0	0.00174737	212
2	GO_NEGATIVE_REGULATION_OF_INNATE_IMMUNE_RESPONSE	GO_NEGATIVE_REGULATION_OF_INNATE_IMMUNE_RESPONSE	29	-0.647643	-1.92029	0	0.00187551	213
2	GO_REGULATION_OF_CELL_KILLING	GO_REGULATION_OF_CELL_KILLING	44	-0.593528	-1.91588	0	0.00197345	214
2	GO_PROTEASE_BINDING	GO_PROTEASE_BINDING	84	-0.529162	-1.91012	0	0.00209633	215
2	GO_NEGATIVE_REGULATION_OF_T_CELL_DIFFERENTIATION	GO_NEGATIVE_REGULATION_OF_T_CELL_DIFFERENTIATION	19	-0.71655	-1.90944	0	0.00210793	216
2	GO_T_CELL_HOMEOSTASIS	GO_T_CELL_HOMEOSTASIS	24	-0.660349	-1.89902	0	0.00234728	217
2	GO_REGULATION_OF_LEUKOCYTE_MEDIATED_CYTOTOXICITY	GO_REGULATION_OF_LEUKOCYTE_MEDIATED_CYTOTOXICITY	38	-0.595966	-1.89618	0	0.00242044	218
2	GO_T_CELL_DIFFERENTIATION_INVOLVED_IN_IMMUNE_RESPONSE	GO_T_CELL_DIFFERENTIATION_INVOLVED_IN_IMMUNE_RESPONSE	24	-0.670869	-1.89395	0.00214592	0.00247761	219
2	GO_POSITIVE_REGULATION_OF_ALPHA_BETA_T_CELL_ACTIVATION	GO_POSITIVE_REGULATION_OF_ALPHA_BETA_T_CELL_ACTIVATION	38	-0.61013	-1.89339	0	0.00249076	220
2	GO_REGULATION_OF_T_CELL_MEDIATED_CYTOTOXICITY	GO_REGULATION_OF_T_CELL_MEDIATED_CYTOTOXICITY	20	-0.683388	-1.89107	0	0.0025726	221
2	BIOCARTA_IL7_PATHWAY	BIOCARTA_IL7_PATHWAY	17	-0.733036	-1.88964	0	0.00259479	222
2	GO_POSITIVE_REGULATION_OF_ACTIVATED_T_CELL_PROLIFERATION	GO_POSITIVE_REGULATION_OF_ACTIVATED_T_CELL_PROLIFERATION	20	-0.683283	-1.88798	0	0.00264509	223
2	GO_POSITIVE_REGULATION_OF_B_CELL_ACTIVATION	GO_POSITIVE_REGULATION_OF_B_CELL_ACTIVATION	53	-0.567282	-1.88706	0	0.00266695	224
2	GO_CELLULAR_RESPONSE_TO_VIRUS	GO_CELLULAR_RESPONSE_TO_VIRUS	19	-0.702425	-1.88492	0	0.00272584	225
2	GO_ADAPTIVE_IMMUNE_RESPONSE	GO_ADAPTIVE_IMMUNE_RESPONSE	182	-0.470033	-1.88384	0	0.00276073	226
2	GO_REGULATION_OF_RESPONSE_TO_INTERFERON_GAMMA	GO_REGULATION_OF_RESPONSE_TO_INTERFERON_GAMMA	18	-0.708991	-1.88323	0.00581395	0.00278203	227
2	GO_POSITIVE_REGULATION_OF_TUMOR_NECROSIS_FACTOR_SUPERFAMILY_CYTOKINE_PRODUCTION	GO_POSITIVE_REGULATION_OF_TUMOR_NECROSIS_FACTOR_SUPERFAMILY_CYTOKINE_PRODUCTION	47	-0.579764	-1.88326	0	0.0027832	228
2	GO_REGULATION_OF_ALPHA_BETA_T_CELL_PROLIFERATION	GO_REGULATION_OF_ALPHA_BETA_T_CELL_PROLIFERATION	18	-0.71389	-1.87225	0	0.00316463	229
2	GO_T_HELPER_1_TYPE_IMMUNE_RESPONSE	GO_T_HELPER_1_TYPE_IMMUNE_RESPONSE	18	-0.711893	-1.86353	0	0.00346533	230
2	GO_LEUKOCYTE_HOMEOSTASIS	GO_LEUKOCYTE_HOMEOSTASIS	41	-0.574248	-1.86018	0	0.00360357	231
2	GO_POSITIVE_REGULATION_OF_ALPHA_BETA_T_CELL_DIFFERENTIATION	GO_POSITIVE_REGULATION_OF_ALPHA_BETA_T_CELL_DIFFERENTIATION	27	-0.646606	-1.8599	0	0.00361366	232
2	GO_REGULATION_OF_DEFENSE_RESPONSE_TO_VIRUS_BY_HOST	GO_REGULATION_OF_DEFENSE_RESPONSE_TO_VIRUS_BY_HOST	86	-0.504686	-1.85808	0.00198807	0.00369254	233
2	GO_NEGATIVE_REGULATION_OF_NF_KAPPAB_TRANSCRIPTION_FACTOR_ACTIVITY	GO_NEGATIVE_REGULATION_OF_NF_KAPPAB_TRANSCRIPTION_FACTOR_ACTIVITY	49	-0.552882	-1.85609	0	0.00378376	234
2	GO_POSITIVE_REGULATION_OF_INTERLEUKIN_2_PRODUCTION	GO_POSITIVE_REGULATION_OF_INTERLEUKIN_2_PRODUCTION	25	-0.640694	-1.85497	0	0.00383874	235
2	GO_T_CELL_MEDIATED_IMMUNITY	GO_T_CELL_MEDIATED_IMMUNITY	23	-0.662516	-1.85391	0	0.00386531	236
2	GO_POSITIVE_REGULATION_OF_LEUKOCYTE_DIFFERENTIATION	GO_POSITIVE_REGULATION_OF_LEUKOCYTE_DIFFERENTIATION	98	-0.494285	-1.85291	0	0.00391206	237
2	GO_REGULATION_OF_TUMOR_NECROSIS_FACTOR_MEDIATED_SIGNALING_PATHWAY	GO_REGULATION_OF_TUMOR_NECROSIS_FACTOR_MEDIATED_SIGNALING_PATHWAY	42	-0.592697	-1.85184	0	0.00394878	238
2	GO_REGULATION_OF_INTERLEUKIN_2_PRODUCTION	GO_REGULATION_OF_INTERLEUKIN_2_PRODUCTION	33	-0.625486	-1.85169	0	0.00395062	239
2	GO_HUMORAL_IMMUNE_RESPONSE	GO_HUMORAL_IMMUNE_RESPONSE	89	-0.506625	-1.84563	0	0.00423516	240
2	GO_LEUKOCYTE_PROLIFERATION	GO_LEUKOCYTE_PROLIFERATION	61	-0.544841	-1.84582	0	0.00423691	241
2	GO_NEGATIVE_REGULATION_OF_DEFENSE_RESPONSE_TO_VIRUS	GO_NEGATIVE_REGULATION_OF_DEFENSE_RESPONSE_TO_VIRUS	15	-0.726454	-1.84455	0.00642398	0.0042751	242
2	GO_CD4_POSITIVE_ALPHA_BETA_T_CELL_ACTIVATION	GO_CD4_POSITIVE_ALPHA_BETA_T_CELL_ACTIVATION	24	-0.647449	-1.84171	0	0.00441331	243
2	KEGG_PRIMARY_IMMUNODEFICIENCY	KEGG_PRIMARY_IMMUNODEFICIENCY	24	-0.647966	-1.84088	0.00635593	0.0044626	244
2	GO_TUMOR_NECROSIS_FACTOR_RECEPTOR_BINDING	GO_TUMOR_NECROSIS_FACTOR_RECEPTOR_BINDING	24	-0.651291	-1.83013	0.00200803	0.00500652	245
2	GO_RESPONSE_TO_OXIDATIVE_STRESS	GO_RESPONSE_TO_OXIDATIVE_STRESS	270	-0.431218	-1.82877	0	0.00506674	246
2	GO_INNATE_IMMUNE_RESPONSE_ACTIVATING_CELL_SURFACE_RECEPTOR_SIGNALING_PATHWAY	GO_INNATE_IMMUNE_RESPONSE_ACTIVATING_CELL_SURFACE_RECEPTOR_SIGNALING_PATHWAY	93	-0.504104	-1.82595	0	0.00520375	247
2	KEGG_EPITHELIAL_CELL_SIGNALING_IN_HELICOBACTER_PYLORI_INFECTION	KEGG_EPITHELIAL_CELL_SIGNALING_IN_HELICOBACTER_PYLORI_INFECTION	55	-0.527055	-1.82151	0	0.00548285	248
2	GO_CELLULAR_RESPONSE_TO_OXIDATIVE_STRESS	GO_CELLULAR_RESPONSE_TO_OXIDATIVE_STRESS	144	-0.46208	-1.82079	0	0.00551375	249
2	GO_LEUKOCYTE_APOPTOTIC_PROCESS	GO_LEUKOCYTE_APOPTOTIC_PROCESS	17	-0.704039	-1.81813	0	0.00565959	250
2	GO_DEATH_RECEPTOR_BINDING	GO_DEATH_RECEPTOR_BINDING	16	-0.724712	-1.81426	0	0.00590102	251
2	GO_T_CELL_ACTIVATION_INVOLVED_IN_IMMUNE_RESPONSE	GO_T_CELL_ACTIVATION_INVOLVED_IN_IMMUNE_RESPONSE	41	-0.580695	-1.81125	0.00192308	0.00604506	252
2	BIOCARTA_IL12_PATHWAY	BIOCARTA_IL12_PATHWAY	18	-0.679991	-1.80434	0.00441501	0.00647998	253
2	GO_POSITIVE_REGULATION_OF_CYTOKINE_PRODUCTION_INVOLVED_IN_IMMUNE_RESPONSE	GO_POSITIVE_REGULATION_OF_CYTOKINE_PRODUCTION_INVOLVED_IN_IMMUNE_RESPONSE	21	-0.663731	-1.79271	0	0.00731623	254
2	GO_REGULATION_OF_MONOCYTE_CHEMOTAXIS	GO_REGULATION_OF_MONOCYTE_CHEMOTAXIS	17	-0.68171	-1.78651	0.00410678	0.00774127	255
2	GO_LYMPHOCYTE_ACTIVATION	GO_LYMPHOCYTE_ACTIVATION	256	-0.4262	-1.78619	0	0.00774649	256
2	GO_POSITIVE_REGULATION_OF_TYROSINE_PHOSPHORYLATION_OF_STAT3_PROTEIN	GO_POSITIVE_REGULATION_OF_TYROSINE_PHOSPHORYLATION_OF_STAT3_PROTEIN	24	-0.633754	-1.78391	0.00819672	0.00792044	257
2	GO_POSITIVE_REGULATION_OF_T_CELL_MEDIATED_IMMUNITY	GO_POSITIVE_REGULATION_OF_T_CELL_MEDIATED_IMMUNITY	23	-0.645471	-1.78308	0.0043573	0.00798912	258
2	BIOCARTA_TH1TH2_PATHWAY	BIOCARTA_TH1TH2_PATHWAY	15	-0.705106	-1.78197	0.00425532	0.00805133	259
2	GO_NEGATIVE_REGULATION_OF_STAT_CASCADE	GO_NEGATIVE_REGULATION_OF_STAT_CASCADE	24	-0.624362	-1.78022	0.00421053	0.00820668	260
2	GO_REGULATION_OF_INTERLEUKIN_17_PRODUCTION	GO_REGULATION_OF_INTERLEUKIN_17_PRODUCTION	16	-0.685145	-1.77782	0.00200401	0.00839491	261
2	GO_CELLULAR_RESPONSE_TO_HYDROGEN_PEROXIDE	GO_CELLULAR_RESPONSE_TO_HYDROGEN_PEROXIDE	50	-0.530105	-1.77285	0.00198413	0.00881988	262
2	KEGG_NATURAL_KILLER_CELL_MEDIATED_CYTOTOXICITY	KEGG_NATURAL_KILLER_CELL_MEDIATED_CYTOTOXICITY	94	-0.477851	-1.76639	0	0.00935976	263
2	GO_POSITIVE_REGULATION_OF_LEUKOCYTE_MEDIATED_IMMUNITY	GO_POSITIVE_REGULATION_OF_LEUKOCYTE_MEDIATED_IMMUNITY	59	-0.516513	-1.76587	0	0.00939909	264
2	BIOCARTA_IL2RB_PATHWAY	BIOCARTA_IL2RB_PATHWAY	37	-0.566755	-1.76251	0.0040404	0.0097252	265
2	GO_MHC_CLASS_I_PROTEIN_BINDING	GO_MHC_CLASS_I_PROTEIN_BINDING	16	-0.680506	-1.75941	0.0102669	0.0100028	266
2	GO_NEGATIVE_REGULATION_OF_T_CELL_PROLIFERATION	GO_NEGATIVE_REGULATION_OF_T_CELL_PROLIFERATION	36	-0.561735	-1.75634	0.00399202	0.0102685	267
2	GO_ANTIGEN_PROCESSING_AND_PRESENTATION_OF_PEPTIDE_ANTIGEN_VIA_MHC_CLASS_I	GO_ANTIGEN_PROCESSING_AND_PRESENTATION_OF_PEPTIDE_ANTIGEN_VIA_MHC_CLASS_I	79	-0.483767	-1.75493	0.00178891	0.0104138	268
2	GO_REGULATION_OF_MACROPHAGE_ACTIVATION	GO_REGULATION_OF_MACROPHAGE_ACTIVATION	16	-0.693208	-1.75472	0.0123203	0.0104273	269
2	GO_POSITIVE_REGULATION_OF_LYMPHOCYTE_MEDIATED_IMMUNITY	GO_POSITIVE_REGULATION_OF_LYMPHOCYTE_MEDIATED_IMMUNITY	49	-0.539857	-1.74714	0	0.0111714	270
2	GO_ANTIGEN_PROCESSING_AND_PRESENTATION_OF_EXOGENOUS_PEPTIDE_ANTIGEN_VIA_MHC_CLASS_I	GO_ANTIGEN_PROCESSING_AND_PRESENTATION_OF_EXOGENOUS_PEPTIDE_ANTIGEN_VIA_MHC_CLASS_I	59	-0.509819	-1.74671	0	0.0112081	271
2	GO_NEGATIVE_REGULATION_OF_LEUKOCYTE_MEDIATED_IMMUNITY	GO_NEGATIVE_REGULATION_OF_LEUKOCYTE_MEDIATED_IMMUNITY	36	-0.561201	-1.74172	0.00400802	0.0117642	272
2	GO_NEGATIVE_REGULATION_OF_LEUKOCYTE_PROLIFERATION	GO_NEGATIVE_REGULATION_OF_LEUKOCYTE_PROLIFERATION	50	-0.525746	-1.73859	0.00197239	0.0120878	273
2	GO_POSITIVE_REGULATION_OF_ALPHA_BETA_T_CELL_PROLIFERATION	GO_POSITIVE_REGULATION_OF_ALPHA_BETA_T_CELL_PROLIFERATION	15	-0.686975	-1.73411	0.004	0.012579	274
2	GO_POSITIVE_REGULATION_OF_IMMUNOGLOBULIN_PRODUCTION	GO_POSITIVE_REGULATION_OF_IMMUNOGLOBULIN_PRODUCTION	23	-0.612728	-1.73333	0.00980392	0.0126653	275
2	KEGG_SYSTEMIC_LUPUS_ERYTHEMATOSUS	KEGG_SYSTEMIC_LUPUS_ERYTHEMATOSUS	68	-0.493126	-1.73326	0	0.0126655	276
2	GO_NEGATIVE_REGULATION_OF_LEUKOCYTE_APOPTOTIC_PROCESS	GO_NEGATIVE_REGULATION_OF_LEUKOCYTE_APOPTOTIC_PROCESS	33	-0.574435	-1.72883	0.00590551	0.0132301	277
2	GO_NEGATIVE_REGULATION_OF_LYMPHOCYTE_MEDIATED_IMMUNITY	GO_NEGATIVE_REGULATION_OF_LYMPHOCYTE_MEDIATED_IMMUNITY	26	-0.6018	-1.726	0.00584795	0.0135408	278
2	GO_T_CELL_DIFFERENTIATION	GO_T_CELL_DIFFERENTIATION	95	-0.456812	-1.70644	0	0.0159746	279
2	GO_SIGNAL_TRANSDUCTION_BY_PROTEIN_PHOSPHORYLATION	GO_SIGNAL_TRANSDUCTION_BY_PROTEIN_PHOSPHORYLATION	290	-0.400994	-1.70657	0	0.0159765	280
2	GO_T_CELL_PROLIFERATION	GO_T_CELL_PROLIFERATION	32	-0.563492	-1.70599	0.00978474	0.0160207	281
2	GO_NEGATIVE_REGULATION_OF_LYMPHOCYTE_DIFFERENTIATION	GO_NEGATIVE_REGULATION_OF_LYMPHOCYTE_DIFFERENTIATION	26	-0.581151	-1.70497	0.00817996	0.0161377	282
2	GO_DEFENSE_RESPONSE_TO_GRAM_POSITIVE_BACTERIUM	GO_DEFENSE_RESPONSE_TO_GRAM_POSITIVE_BACTERIUM	44	-0.538113	-1.7002	0.00561798	0.0167723	283
2	GO_NEGATIVE_REGULATION_OF_CYTOKINE_PRODUCTION_INVOLVED_IN_IMMUNE_RESPONSE	GO_NEGATIVE_REGULATION_OF_CYTOKINE_PRODUCTION_INVOLVED_IN_IMMUNE_RESPONSE	17	-0.658449	-1.69965	0.014553	0.016824	284
2	GO_REGULATION_OF_ACUTE_INFLAMMATORY_RESPONSE	GO_REGULATION_OF_ACUTE_INFLAMMATORY_RESPONSE	49	-0.520478	-1.69951	0.00414079	0.0168376	285
2	KEGG_ASTHMA	KEGG_ASTHMA	18	-0.639396	-1.69824	0.00647948	0.016993	286
2	GO_INFLAMMATORY_RESPONSE_TO_ANTIGENIC_STIMULUS	GO_INFLAMMATORY_RESPONSE_TO_ANTIGENIC_STIMULUS	19	-0.631804	-1.6975	0.0146138	0.0170902	287
2	GO_NEGATIVE_REGULATION_OF_ADAPTIVE_IMMUNE_RESPONSE	GO_NEGATIVE_REGULATION_OF_ADAPTIVE_IMMUNE_RESPONSE	25	-0.594031	-1.69545	0.0106157	0.0173416	288
2	GO_REGULATION_OF_IMMUNOGLOBULIN_PRODUCTION	GO_REGULATION_OF_IMMUNOGLOBULIN_PRODUCTION	33	-0.543746	-1.69526	0.0189076	0.017366	289
2	GO_IMMUNE_RESPONSE_REGULATING_CELL_SURFACE_RECEPTOR_SIGNALING_PATHWAY	GO_IMMUNE_RESPONSE_REGULATING_CELL_SURFACE_RECEPTOR_SIGNALING_PATHWAY	245	-0.404038	-1.69372	0	0.0175404	290
2	GO_NEGATIVE_REGULATION_OF_INTERFERON_GAMMA_PRODUCTION	GO_NEGATIVE_REGULATION_OF_INTERFERON_GAMMA_PRODUCTION	25	-0.594817	-1.68946	0.0147679	0.0182383	291
2	BIOCARTA_PDGF_PATHWAY	BIOCARTA_PDGF_PATHWAY	31	-0.554834	-1.68757	0.00978474	0.0184992	292
2	GO_LYMPHOCYTE_COSTIMULATION	GO_LYMPHOCYTE_COSTIMULATION	54	-0.500656	-1.68759	0	0.0185049	293
2	GO_POSITIVE_REGULATION_OF_ACUTE_INFLAMMATORY_RESPONSE	GO_POSITIVE_REGULATION_OF_ACUTE_INFLAMMATORY_RESPONSE	20	-0.614961	-1.6861	0.0165975	0.0187436	294
2	GO_CELLULAR_DEFENSE_RESPONSE	GO_CELLULAR_DEFENSE_RESPONSE	37	-0.533662	-1.6858	0.00384615	0.0187764	295
2	GO_CELL_ACTIVATION_INVOLVED_IN_IMMUNE_RESPONSE	GO_CELL_ACTIVATION_INVOLVED_IN_IMMUNE_RESPONSE	97	-0.454341	-1.68517	0.00182815	0.0188815	296
2	GO_REGULATION_OF_TRANSFORMING_GROWTH_FACTOR_BETA_PRODUCTION	GO_REGULATION_OF_TRANSFORMING_GROWTH_FACTOR_BETA_PRODUCTION	17	-0.639059	-1.67836	0.0130435	0.0198889	297
2	GO_REGULATION_OF_INTERLEUKIN_10_PRODUCTION	GO_REGULATION_OF_INTERLEUKIN_10_PRODUCTION	29	-0.565272	-1.67252	0.00986193	0.0207601	298
2	GO_B_CELL_MEDIATED_IMMUNITY	GO_B_CELL_MEDIATED_IMMUNITY	50	-0.504989	-1.66907	0.00390625	0.0213366	299
2	GO_NEGATIVE_REGULATION_OF_CHEMOTAXIS	GO_NEGATIVE_REGULATION_OF_CHEMOTAXIS	35	-0.538657	-1.66716	0.00428265	0.0216373	300
2	GO_T_CELL_SELECTION	GO_T_CELL_SELECTION	27	-0.564894	-1.66675	0.0210526	0.0217086	301
2	GO_REGULATION_OF_T_CELL_RECEPTOR_SIGNALING_PATHWAY	GO_REGULATION_OF_T_CELL_RECEPTOR_SIGNALING_PATHWAY	24	-0.588822	-1.65707	0.0189474	0.0233286	302
2	GO_LYMPHOCYTE_HOMEOSTASIS	GO_LYMPHOCYTE_HOMEOSTASIS	34	-0.538962	-1.6552	0.0155945	0.0236602	303
2	GO_NEGATIVE_REGULATION_OF_TUMOR_NECROSIS_FACTOR_SUPERFAMILY_CYTOKINE_PRODUCTION	GO_NEGATIVE_REGULATION_OF_TUMOR_NECROSIS_FACTOR_SUPERFAMILY_CYTOKINE_PRODUCTION	30	-0.553837	-1.65484	0.0043384	0.0237032	304
2	GO_REGULATION_OF_NATURAL_KILLER_CELL_MEDIATED_IMMUNITY	GO_REGULATION_OF_NATURAL_KILLER_CELL_MEDIATED_IMMUNITY	25	-0.580021	-1.64907	0.0151515	0.0245342	305
2	GO_LEUKOCYTE_DIFFERENTIATION	GO_LEUKOCYTE_DIFFERENTIATION	214	-0.396925	-1.64886	0	0.0245578	306
2	GO_REGULATION_OF_ANTIGEN_RECEPTOR_MEDIATED_SIGNALING_PATHWAY	GO_REGULATION_OF_ANTIGEN_RECEPTOR_MEDIATED_SIGNALING_PATHWAY	33	-0.537242	-1.6357	0.0163934	0.0272551	307
2	GO_NEGATIVE_REGULATION_OF_LYMPHOCYTE_APOPTOTIC_PROCESS	GO_NEGATIVE_REGULATION_OF_LYMPHOCYTE_APOPTOTIC_PROCESS	19	-0.60944	-1.63557	0.0180361	0.0272774	308
2	GO_VIRUS_RECEPTOR_ACTIVITY	GO_VIRUS_RECEPTOR_ACTIVITY	55	-0.476408	-1.62929	0.00591716	0.0284786	309
2	BIOCARTA_IL2_PATHWAY	BIOCARTA_IL2_PATHWAY	21	-0.588832	-1.62437	0.0168067	0.0294008	310
2	GO_T_CELL_RECEPTOR_SIGNALING_PATHWAY	GO_T_CELL_RECEPTOR_SIGNALING_PATHWAY	120	-0.423529	-1.622	0.00377358	0.0298948	311
2	GO_NEGATIVE_REGULATION_OF_VIRAL_TRANSCRIPTION	GO_NEGATIVE_REGULATION_OF_VIRAL_TRANSCRIPTION	20	-0.594945	-1.61819	0.0215517	0.030692	312
2	GO_POSITIVE_REGULATION_OF_RESPONSE_TO_CYTOKINE_STIMULUS	GO_POSITIVE_REGULATION_OF_RESPONSE_TO_CYTOKINE_STIMULUS	23	-0.582087	-1.6148	0.0188285	0.0314455	313
2	GO_ACUTE_INFLAMMATORY_RESPONSE	GO_ACUTE_INFLAMMATORY_RESPONSE	44	-0.499487	-1.61256	0.0165631	0.0318549	314
2	GO_CYTOKINE_SECRETION	GO_CYTOKINE_SECRETION	26	-0.565504	-1.61207	0.012685	0.0319357	315
2	GO_MODULATION_BY_SYMBIONT_OF_HOST_CELLULAR_PROCESS	GO_MODULATION_BY_SYMBIONT_OF_HOST_CELLULAR_PROCESS	25	-0.570271	-1.61092	0.0186335	0.0321963	316
2	GO_RESPONSE_TO_INTERLEUKIN_6	GO_RESPONSE_TO_INTERLEUKIN_6	21	-0.587713	-1.60771	0.0230126	0.0328239	317
2	GO_REGULATION_OF_MAST_CELL_ACTIVATION	GO_REGULATION_OF_MAST_CELL_ACTIVATION	30	-0.524653	-1.60206	0.0251572	0.0341536	318
2	GO_IMMUNE_SYSTEM_DEVELOPMENT	GO_IMMUNE_SYSTEM_DEVELOPMENT	412	-0.360789	-1.60028	0	0.0345507	319
2	KEGG_ANTIGEN_PROCESSING_AND_PRESENTATION	KEGG_ANTIGEN_PROCESSING_AND_PRESENTATION	58	-0.476515	-1.59675	0.0143443	0.0354135	320
2	GO_POSITIVE_REGULATION_OF_INTERLEUKIN_10_PRODUCTION	GO_POSITIVE_REGULATION_OF_INTERLEUKIN_10_PRODUCTION	19	-0.609627	-1.59025	0.0298211	0.0369823	321
2	GO_NEGATIVE_REGULATION_OF_TOLL_LIKE_RECEPTOR_SIGNALING_PATHWAY	GO_NEGATIVE_REGULATION_OF_TOLL_LIKE_RECEPTOR_SIGNALING_PATHWAY	18	-0.607363	-1.58876	0.045738	0.0373416	322
2	GO_NEGATIVE_REGULATION_OF_LEUKOCYTE_DIFFERENTIATION	GO_NEGATIVE_REGULATION_OF_LEUKOCYTE_DIFFERENTIATION	56	-0.465399	-1.58032	0.0117647	0.0393984	323
2	GO_REGULATION_OF_MYELOID_CELL_DIFFERENTIATION	GO_REGULATION_OF_MYELOID_CELL_DIFFERENTIATION	127	-0.401167	-1.58036	0.00191205	0.0393991	324
2	GO_PRODUCTION_OF_MOLECULAR_MEDIATOR_OF_IMMUNE_RESPONSE	GO_PRODUCTION_OF_MOLECULAR_MEDIATOR_OF_IMMUNE_RESPONSE	46	-0.483384	-1.58019	0.00813008	0.0394231	325
2	KEGG_VIRAL_MYOCARDITIS	KEGG_VIRAL_MYOCARDITIS	50	-0.481196	-1.57534	0.00607287	0.0407457	326
2	GO_REGULATION_OF_B_CELL_APOPTOTIC_PROCESS	GO_REGULATION_OF_B_CELL_APOPTOTIC_PROCESS	17	-0.602634	-1.57501	0.045929	0.0407907	327
2	GO_IMMUNOGLOBULIN_PRODUCTION	GO_IMMUNOGLOBULIN_PRODUCTION	33	-0.51063	-1.57477	0.0224949	0.0408389	328
2	GO_ACUTE_PHASE_RESPONSE	GO_ACUTE_PHASE_RESPONSE	25	-0.552536	-1.56892	0.0328542	0.0424218	329
2	GO_FC_RECEPTOR_SIGNALING_PATHWAY	GO_FC_RECEPTOR_SIGNALING_PATHWAY	163	-0.391882	-1.56897	0.00362976	0.042445	330
2	GO_LYMPHOCYTE_DIFFERENTIATION	GO_LYMPHOCYTE_DIFFERENTIATION	148	-0.396448	-1.56524	0.0037594	0.0434173	331
2	GO_NATURAL_KILLER_CELL_ACTIVATION	GO_NATURAL_KILLER_CELL_ACTIVATION	31	-0.522756	-1.56304	0.0167715	0.0440804	332
2	GO_REGULATION_OF_HUMORAL_IMMUNE_RESPONSE	GO_REGULATION_OF_HUMORAL_IMMUNE_RESPONSE	25	-0.547516	-1.55369	0.02079	0.0467859	333
2	GO_NEGATIVE_REGULATION_OF_CYTOKINE_BIOSYNTHETIC_PROCESS	GO_NEGATIVE_REGULATION_OF_CYTOKINE_BIOSYNTHETIC_PROCESS	19	-0.586376	-1.54842	0.037422	0.0483601	334
2	GO_ANTIGEN_RECEPTOR_MEDIATED_SIGNALING_PATHWAY	GO_ANTIGEN_RECEPTOR_MEDIATED_SIGNALING_PATHWAY	145	-0.391057	-1.54611	0.00190476	0.0490722	335
2	GO_MYELOID_LEUKOCYTE_MEDIATED_IMMUNITY	GO_MYELOID_LEUKOCYTE_MEDIATED_IMMUNITY	29	-0.526949	-1.54502	0.0318725	0.0493653	336
2	BIOCARTA_IL6_PATHWAY	BIOCARTA_IL6_PATHWAY	22	-0.554955	-1.54165	0.028866	0.050526	337
2	GO_LYMPHOCYTE_ACTIVATION_INVOLVED_IN_IMMUNE_RESPONSE	GO_LYMPHOCYTE_ACTIVATION_INVOLVED_IN_IMMUNE_RESPONSE	70	-0.434923	-1.54067	0.00996016	0.0508275	338
2	GO_CELLULAR_RESPONSE_TO_INTERLEUKIN_6	GO_CELLULAR_RESPONSE_TO_INTERLEUKIN_6	18	-0.583401	-1.54013	0.0461216	0.0509803	339
2	GO_PHAGOCYTIC_CUP	GO_PHAGOCYTIC_CUP	16	-0.59166	-1.53389	0.0586907	0.053035	340
2	GO_MYELOID_CELL_DIFFERENTIATION	GO_MYELOID_CELL_DIFFERENTIATION	150	-0.383576	-1.53167	0.00359066	0.0539515	341
2	GO_REGULATION_OF_NATURAL_KILLER_CELL_ACTIVATION	GO_REGULATION_OF_NATURAL_KILLER_CELL_ACTIVATION	20	-0.569847	-1.53138	0.0305011	0.0540308	342
2	KEGG_AMYOTROPHIC_LATERAL_SCLEROSIS_ALS	KEGG_AMYOTROPHIC_LATERAL_SCLEROSIS_ALS	40	-0.485223	-1.52735	0.0308008	0.055345	343
2	GO_RESPONSE_TO_FUNGUS	GO_RESPONSE_TO_FUNGUS	29	-0.509508	-1.5255	0.0326087	0.0557422	344
2	GO_MYELOID_LEUKOCYTE_DIFFERENTIATION	GO_MYELOID_LEUKOCYTE_DIFFERENTIATION	74	-0.427128	-1.51543	0.0134615	0.0591517	345
2	GO_MYELOID_CELL_ACTIVATION_INVOLVED_IN_IMMUNE_RESPONSE	GO_MYELOID_CELL_ACTIVATION_INVOLVED_IN_IMMUNE_RESPONSE	27	-0.512527	-1.50578	0.0451613	0.062688	346
2	GO_REGULATION_OF_VIRAL_RELEASE_FROM_HOST_CELL	GO_REGULATION_OF_VIRAL_RELEASE_FROM_HOST_CELL	29	-0.509312	-1.50162	0.0403226	0.0642096	347
2	GO_POSITIVE_REGULATION_OF_B_CELL_MEDIATED_IMMUNITY	GO_POSITIVE_REGULATION_OF_B_CELL_MEDIATED_IMMUNITY	20	-0.558934	-1.5005	0.0489362	0.0646077	348
2	GO_NEGATIVE_REGULATION_OF_B_CELL_ACTIVATION	GO_NEGATIVE_REGULATION_OF_B_CELL_ACTIVATION	27	-0.526349	-1.48968	0.0524194	0.0687564	349
2	GO_POSITIVE_REGULATION_OF_MYELOID_CELL_DIFFERENTIATION	GO_POSITIVE_REGULATION_OF_MYELOID_CELL_DIFFERENTIATION	59	-0.433413	-1.48845	0.0213178	0.0692892	350
2	GO_NEGATIVE_REGULATION_OF_PRODUCTION_OF_MOLECULAR_MEDIATOR_OF_IMMUNE_RESPONSE	GO_NEGATIVE_REGULATION_OF_PRODUCTION_OF_MOLECULAR_MEDIATOR_OF_IMMUNE_RESPONSE	20	-0.547233	-1.48627	0.0287611	0.0701516	351
2	GO_MHC_PROTEIN_BINDING	GO_MHC_PROTEIN_BINDING	23	-0.530949	-1.48411	0.0631579	0.0710683	352
2	KEGG_ACUTE_MYELOID_LEUKEMIA	KEGG_ACUTE_MYELOID_LEUKEMIA	52	-0.44117	-1.48273	0.0432331	0.0716873	353
2	GO_B_CELL_PROLIFERATION	GO_B_CELL_PROLIFERATION	21	-0.531968	-1.48114	0.059867	0.0723803	354
2	GO_POSITIVE_REGULATION_OF_VIRAL_GENOME_REPLICATION	GO_POSITIVE_REGULATION_OF_VIRAL_GENOME_REPLICATION	29	-0.495276	-1.47462	0.0580913	0.0750334	355
2	GO_PHAGOCYTOSIS	GO_PHAGOCYTOSIS	133	-0.374969	-1.47176	0.0205993	0.0761929	356
2	GO_ANTIMICROBIAL_HUMORAL_RESPONSE	GO_ANTIMICROBIAL_HUMORAL_RESPONSE	25	-0.497372	-1.45401	0.0682819	0.0849335	357
2	KEGG_T_CELL_RECEPTOR_SIGNALING_PATHWAY	KEGG_T_CELL_RECEPTOR_SIGNALING_PATHWAY	88	-0.391655	-1.45195	0.018315	0.0858669	358
2	GO_REGULATION_OF_B_CELL_MEDIATED_IMMUNITY	GO_REGULATION_OF_B_CELL_MEDIATED_IMMUNITY	30	-0.492454	-1.44044	0.0513919	0.0916983	359
2	BIOCARTA_NKT_PATHWAY	BIOCARTA_NKT_PATHWAY	20	-0.535643	-1.43895	0.0792683	0.0924643	360
2	GO_REGULATION_OF_MYELOID_LEUKOCYTE_DIFFERENTIATION	GO_REGULATION_OF_MYELOID_LEUKOCYTE_DIFFERENTIATION	79	-0.398312	-1.43513	0.0320151	0.0943167	361
2	GO_ANTIGEN_BINDING	GO_ANTIGEN_BINDING	68	-0.408916	-1.43442	0.0354331	0.0947209	362
2	GO_POSITIVE_REGULATION_OF_CELL_KILLING	GO_POSITIVE_REGULATION_OF_CELL_KILLING	28	-0.481993	-1.43212	0.0622318	0.0960013	363
2	GO_POSITIVE_REGULATION_OF_TOLL_LIKE_RECEPTOR_SIGNALING_PATHWAY	GO_POSITIVE_REGULATION_OF_TOLL_LIKE_RECEPTOR_SIGNALING_PATHWAY	15	-0.560941	-1.42986	0.0710901	0.0974137	364
2	KEGG_FC_GAMMA_R_MEDIATED_PHAGOCYTOSIS	KEGG_FC_GAMMA_R_MEDIATED_PHAGOCYTOSIS	81	-0.401769	-1.42777	0.0237624	0.0986173	365
2	GO_CYTOKINE_BINDING	GO_CYTOKINE_BINDING	66	-0.404881	-1.42151	0.0474308	0.101685	366
2	GO_RESPONSE_TO_ANTIBIOTIC	GO_RESPONSE_TO_ANTIBIOTIC	38	-0.452317	-1.42085	0.07	0.102137	367
2	GO_POSITIVE_REGULATION_OF_AUTOPHAGY	GO_POSITIVE_REGULATION_OF_AUTOPHAGY	59	-0.418489	-1.41222	0.0488798	0.107323	368
2	GO_REGULATION_OF_MYELOID_CELL_APOPTOTIC_PROCESS	GO_REGULATION_OF_MYELOID_CELL_APOPTOTIC_PROCESS	22	-0.508297	-1.41151	0.0823293	0.107772	369
2	GO_NEGATIVE_REGULATION_OF_MYELOID_LEUKOCYTE_DIFFERENTIATION	GO_NEGATIVE_REGULATION_OF_MYELOID_LEUKOCYTE_DIFFERENTIATION	31	-0.467486	-1.39644	0.0712788	0.116361	370
2	GO_POSITIVE_REGULATION_OF_NIK_NF_KAPPAB_SIGNALING	GO_POSITIVE_REGULATION_OF_NIK_NF_KAPPAB_SIGNALING	23	-0.489474	-1.39529	0.0812379	0.117083	371
2	GO_ANTIGEN_PROCESSING_AND_PRESENTATION	GO_ANTIGEN_PROCESSING_AND_PRESENTATION	180	-0.343033	-1.38794	0.0173611	0.12172	372
2	GO_FC_GAMMA_RECEPTOR_SIGNALING_PATHWAY	GO_FC_GAMMA_RECEPTOR_SIGNALING_PATHWAY	67	-0.396847	-1.38746	0.0512821	0.121952	373
2	GO_NF_KAPPAB_BINDING	GO_NF_KAPPAB_BINDING	28	-0.467491	-1.38239	0.0747126	0.125041	374
2	KEGG_B_CELL_RECEPTOR_SIGNALING_PATHWAY	KEGG_B_CELL_RECEPTOR_SIGNALING_PATHWAY	64	-0.393431	-1.37897	0.0752033	0.1269	375
2	GO_B_CELL_ACTIVATION	GO_B_CELL_ACTIVATION	90	-0.372979	-1.37738	0.0372439	0.128049	376
2	GO_REGULATION_OF_TYPE_2_IMMUNE_RESPONSE	GO_REGULATION_OF_TYPE_2_IMMUNE_RESPONSE	17	-0.533792	-1.37441	0.0993658	0.129984	377
2	GO_COMPLEMENT_ACTIVATION	GO_COMPLEMENT_ACTIVATION	27	-0.472345	-1.37301	0.0682731	0.130956	378
2	GO_LEUKOCYTE_DEGRANULATION	GO_LEUKOCYTE_DEGRANULATION	18	-0.519551	-1.37153	0.105477	0.131816	379
2	GO_NEGATIVE_REGULATION_OF_LIPID_STORAGE	GO_NEGATIVE_REGULATION_OF_LIPID_STORAGE	15	-0.542872	-1.36627	0.0976645	0.135432	380
2	GO_REGULATION_OF_MACROPHAGE_DERIVED_FOAM_CELL_DIFFERENTIATION	GO_REGULATION_OF_MACROPHAGE_DERIVED_FOAM_CELL_DIFFERENTIATION	21	-0.490285	-1.36428	0.110619	0.136837	381
2	GO_POSITIVE_T_CELL_SELECTION	GO_POSITIVE_T_CELL_SELECTION	16	-0.536632	-1.36395	0.107066	0.136972	382
2	GO_REGULATION_OF_VIRAL_TRANSCRIPTION	GO_REGULATION_OF_VIRAL_TRANSCRIPTION	56	-0.40678	-1.35876	0.0625	0.140619	383
2	GO_POSITIVE_REGULATION_OF_NATURAL_KILLER_CELL_MEDIATED_IMMUNITY	GO_POSITIVE_REGULATION_OF_NATURAL_KILLER_CELL_MEDIATED_IMMUNITY	15	-0.543743	-1.35729	0.133891	0.141623	384
2	GO_MAST_CELL_ACTIVATION	GO_MAST_CELL_ACTIVATION	15	-0.53377	-1.35495	0.123203	0.142771	385
2	BIOCARTA_TOLL_PATHWAY	BIOCARTA_TOLL_PATHWAY	32	-0.446766	-1.34945	0.0885312	0.146812	386
2	GO_DEFENSE_RESPONSE_TO_GRAM_NEGATIVE_BACTERIUM	GO_DEFENSE_RESPONSE_TO_GRAM_NEGATIVE_BACTERIUM	24	-0.472723	-1.34788	0.0945378	0.147968	387
2	GO_NEGATIVE_REGULATION_OF_MYELOID_CELL_DIFFERENTIATION	GO_NEGATIVE_REGULATION_OF_MYELOID_CELL_DIFFERENTIATION	57	-0.392792	-1.342	0.073501	0.152117	388
2	GO_BRAIN_MORPHOGENESIS	GO_BRAIN_MORPHOGENESIS	18	-0.502486	-1.34096	0.141026	0.152926	389
2	GO_POSITIVE_CHEMOTAXIS	GO_POSITIVE_CHEMOTAXIS	22	-0.485167	-1.33996	0.107595	0.153638	390
2	GO_FC_EPSILON_RECEPTOR_SIGNALING_PATHWAY	GO_FC_EPSILON_RECEPTOR_SIGNALING_PATHWAY	113	-0.350145	-1.33956	0.0423077	0.153951	391
2	GO_CELLULAR_RESPONSE_TO_DSRNA	GO_CELLULAR_RESPONSE_TO_DSRNA	29	-0.449663	-1.33525	0.112735	0.157186	392
2	GO_REGULATION_OF_ISOTYPE_SWITCHING	GO_REGULATION_OF_ISOTYPE_SWITCHING	20	-0.475454	-1.31706	0.130518	0.171871	393
2	GO_MYELOID_CELL_HOMEOSTASIS	GO_MYELOID_CELL_HOMEOSTASIS	73	-0.361791	-1.28924	0.0993915	0.196395	394
2	GO_HEMATOPOIETIC_PROGENITOR_CELL_DIFFERENTIATION	GO_HEMATOPOIETIC_PROGENITOR_CELL_DIFFERENTIATION	62	-0.3716	-1.28811	0.0932039	0.197557	395
2	GO_NATURAL_KILLER_CELL_MEDIATED_IMMUNITY	GO_NATURAL_KILLER_CELL_MEDIATED_IMMUNITY	15	-0.502251	-1.28715	0.169492	0.19829	396
2	GO_HUMORAL_IMMUNE_RESPONSE_MEDIATED_BY_CIRCULATING_IMMUNOGLOBULIN	GO_HUMORAL_IMMUNE_RESPONSE_MEDIATED_BY_CIRCULATING_IMMUNOGLOBULIN	24	-0.449406	-1.28633	0.141434	0.19889	397
2	GO_NEGATIVE_CHEMOTAXIS	GO_NEGATIVE_CHEMOTAXIS	26	-0.439296	-1.27999	0.149805	0.204888	398
2	GO_MODULATION_BY_HOST_OF_VIRAL_PROCESS	GO_MODULATION_BY_HOST_OF_VIRAL_PROCESS	15	-0.50451	-1.27525	0.169165	0.209155	399
2	GO_VIRAL_LIFE_CYCLE	GO_VIRAL_LIFE_CYCLE	249	-0.302551	-1.27415	0.0500864	0.210262	400
2	GO_REGULATION_OF_NIK_NF_KAPPAB_SIGNALING	GO_REGULATION_OF_NIK_NF_KAPPAB_SIGNALING	31	-0.414523	-1.25975	0.170576	0.224297	401
3	GO_REGULATION_OF_MULTI_ORGANISM_PROCESS	GO_REGULATION_OF_MULTI_ORGANISM_PROCESS	343	-0.544171	-2.36257	0	0	1
3	GO_REGULATION_OF_RESPONSE_TO_WOUNDING	GO_REGULATION_OF_RESPONSE_TO_WOUNDING	262	-0.568459	-2.40042	0	0	2
3	GO_REGULATION_OF_SYMBIOSIS_ENCOMPASSING_MUTUALISM_THROUGH_PARASITISM	GO_REGULATION_OF_SYMBIOSIS_ENCOMPASSING_MUTUALISM_THROUGH_PARASITISM	168	-0.644878	-2.60272	0	0	3
3	KEGG_APOPTOSIS	KEGG_APOPTOSIS	75	-0.65956	-2.34762	0	0	4
3	GO_POSITIVE_REGULATION_OF_SEQUENCE_SPECIFIC_DNA_BINDING_TRANSCRIPTION_FACTOR_ACTIVITY	GO_POSITIVE_REGULATION_OF_SEQUENCE_SPECIFIC_DNA_BINDING_TRANSCRIPTION_FACTOR_ACTIVITY	167	-0.557857	-2.24614	0	2.21728e-06	5
3	GO_POSITIVE_REGULATION_OF_RESPONSE_TO_EXTERNAL_STIMULUS	GO_POSITIVE_REGULATION_OF_RESPONSE_TO_EXTERNAL_STIMULUS	196	-0.552456	-2.26747	0	2.33293e-06	6
3	GO_NEGATIVE_REGULATION_OF_SIGNAL_TRANSDUCTION_IN_ABSENCE_OF_LIGAND	GO_NEGATIVE_REGULATION_OF_SIGNAL_TRANSDUCTION_IN_ABSENCE_OF_LIGAND	21	-0.846715	-2.26784	0	2.33713e-06	7
3	GO_POSITIVE_REGULATION_OF_PEPTIDYL_TYROSINE_PHOSPHORYLATION	GO_POSITIVE_REGULATION_OF_PEPTIDYL_TYROSINE_PHOSPHORYLATION	105	-0.58311	-2.23058	0	6.389e-06	8
3	GO_EXTRINSIC_APOPTOTIC_SIGNALING_PATHWAY	GO_EXTRINSIC_APOPTOTIC_SIGNALING_PATHWAY	81	-0.617641	-2.23305	0	6.42073e-06	9
3	GO_REGULATION_OF_CYSTEINE_TYPE_ENDOPEPTIDASE_ACTIVITY	GO_REGULATION_OF_CYSTEINE_TYPE_ENDOPEPTIDASE_ACTIVITY	160	-0.554627	-2.22279	0	1.05335e-05	10
3	GO_REGULATION_OF_PEPTIDYL_TYROSINE_PHOSPHORYLATION	GO_REGULATION_OF_PEPTIDYL_TYROSINE_PHOSPHORYLATION	147	-0.562236	-2.22491	0	1.05506e-05	11
3	GO_REGULATION_OF_CELL_CELL_ADHESION	GO_REGULATION_OF_CELL_CELL_ADHESION	264	-0.520427	-2.22738	0	1.05851e-05	12
3	BIOCARTA_DEATH_PATHWAY	BIOCARTA_DEATH_PATHWAY	30	-0.748328	-2.22742	0	1.06024e-05	13
3	GO_POSITIVE_REGULATION_OF_CELL_CELL_ADHESION	GO_POSITIVE_REGULATION_OF_CELL_CELL_ADHESION	173	-0.55127	-2.21701	0	1.2451e-05	14
3	GO_REGULATION_OF_PEPTIDASE_ACTIVITY	GO_REGULATION_OF_PEPTIDASE_ACTIVITY	247	-0.511882	-2.17625	0	3.10803e-05	15
3	GO_REGULATION_OF_HOMOTYPIC_CELL_CELL_ADHESION	GO_REGULATION_OF_HOMOTYPIC_CELL_CELL_ADHESION	216	-0.523801	-2.17632	0	3.1127e-05	16
3	GO_REGULATION_OF_EXTRINSIC_APOPTOTIC_SIGNALING_PATHWAY_VIA_DEATH_DOMAIN_RECEPTORS	GO_REGULATION_OF_EXTRINSIC_APOPTOTIC_SIGNALING_PATHWAY_VIA_DEATH_DOMAIN_RECEPTORS	45	-0.666469	-2.16574	0	3.39183e-05	17
3	GO_POSITIVE_REGULATION_OF_ERK1_AND_ERK2_CASCADE	GO_POSITIVE_REGULATION_OF_ERK1_AND_ERK2_CASCADE	100	-0.578616	-2.16667	0	3.40671e-05	18
3	GO_RESPONSE_TO_EXOGENOUS_DSRNA	GO_RESPONSE_TO_EXOGENOUS_DSRNA	26	-0.759198	-2.15806	0	3.67391e-05	19
3	GO_POSITIVE_REGULATION_OF_LOCOMOTION	GO_POSITIVE_REGULATION_OF_LOCOMOTION	285	-0.50136	-2.15162	0	4.72172e-05	20
3	GO_APOPTOTIC_SIGNALING_PATHWAY	GO_APOPTOTIC_SIGNALING_PATHWAY	229	-0.514246	-2.15017	0	5.07647e-05	21
3	HALLMARK_APOPTOSIS	HALLMARK_APOPTOSIS	149	-0.544638	-2.14702	0	5.2463e-05	22
3	GO_ESTABLISHMENT_OF_ENDOTHELIAL_BARRIER	GO_ESTABLISHMENT_OF_ENDOTHELIAL_BARRIER	20	-0.774485	-2.12954	0	7.51763e-05	23
3	GO_REGULATION_OF_APOPTOTIC_SIGNALING_PATHWAY	GO_REGULATION_OF_APOPTOTIC_SIGNALING_PATHWAY	284	-0.491443	-2.12433	0	8.26076e-05	24
3	GO_POSITIVE_REGULATION_OF_APOPTOTIC_SIGNALING_PATHWAY	GO_POSITIVE_REGULATION_OF_APOPTOTIC_SIGNALING_PATHWAY	146	-0.532246	-2.11695	0	9.52079e-05	25
3	GO_RESPONSE_TO_VITAMIN_D	GO_RESPONSE_TO_VITAMIN_D	27	-0.722192	-2.10547	0	0.000108541	26
3	GO_CELLULAR_RESPONSE_TO_HEAT	GO_CELLULAR_RESPONSE_TO_HEAT	24	-0.729651	-2.10328	0	0.000117531	27
3	GO_RESPONSE_TO_DSRNA	GO_RESPONSE_TO_DSRNA	49	-0.625651	-2.096	0	0.000138174	28
3	GO_ACTIVATION_OF_CYSTEINE_TYPE_ENDOPEPTIDASE_ACTIVITY	GO_ACTIVATION_OF_CYSTEINE_TYPE_ENDOPEPTIDASE_ACTIVITY	74	-0.589074	-2.09388	0	0.000153759	29
3	GO_ENDOTHELIAL_CELL_DEVELOPMENT	GO_ENDOTHELIAL_CELL_DEVELOPMENT	31	-0.705475	-2.09069	0	0.000165546	30
3	GO_NECROPTOTIC_PROCESS	GO_NECROPTOTIC_PROCESS	21	-0.761055	-2.08459	0	0.000190727	31
3	GO_PROTEIN_TRIMERIZATION	GO_PROTEIN_TRIMERIZATION	29	-0.693365	-2.07937	0	0.000197192	32
3	GO_REGULATION_OF_CYSTEINE_TYPE_ENDOPEPTIDASE_ACTIVITY_INVOLVED_IN_APOPTOTIC_SIGNALING_PATHWAY	GO_REGULATION_OF_CYSTEINE_TYPE_ENDOPEPTIDASE_ACTIVITY_INVOLVED_IN_APOPTOTIC_SIGNALING_PATHWAY	19	-0.764985	-2.07213	0.00389864	0.000224821	33
3	GO_NEGATIVE_REGULATION_OF_RESPONSE_TO_WOUNDING	GO_NEGATIVE_REGULATION_OF_RESPONSE_TO_WOUNDING	100	-0.545799	-2.06879	0	0.000240205	34
3	GO_KERATINOCYTE_DIFFERENTIATION	GO_KERATINOCYTE_DIFFERENTIATION	42	-0.634656	-2.06703	0	0.000244501	35
3	GO_NECROTIC_CELL_DEATH	GO_NECROTIC_CELL_DEATH	27	-0.710412	-2.06115	0	0.000268991	36
3	GO_POSITIVE_REGULATION_OF_CYSTEINE_TYPE_ENDOPEPTIDASE_ACTIVITY_INVOLVED_IN_APOPTOTIC_SIGNALING_PATHWAY	GO_POSITIVE_REGULATION_OF_CYSTEINE_TYPE_ENDOPEPTIDASE_ACTIVITY_INVOLVED_IN_APOPTOTIC_SIGNALING_PATHWAY	16	-0.787685	-2.05735	0	0.000288724	37
3	GO_REGULATION_OF_VASCULATURE_DEVELOPMENT	GO_REGULATION_OF_VASCULATURE_DEVELOPMENT	149	-0.508635	-2.05038	0	0.000319052	38
3	HALLMARK_EPITHELIAL_MESENCHYMAL_TRANSITION	HALLMARK_EPITHELIAL_MESENCHYMAL_TRANSITION	141	-0.520983	-2.04625	0	0.000333765	39
3	GO_REGULATION_OF_ENDOTHELIAL_CELL_APOPTOTIC_PROCESS	GO_REGULATION_OF_ENDOTHELIAL_CELL_APOPTOTIC_PROCESS	22	-0.746257	-2.03646	0	0.000364183	40
3	GO_POSITIVE_REGULATION_OF_CELL_ADHESION	GO_POSITIVE_REGULATION_OF_CELL_ADHESION	263	-0.479937	-2.03161	0	0.000382546	41
3	GO_NEGATIVE_REGULATION_OF_CYSTEINE_TYPE_ENDOPEPTIDASE_ACTIVITY	GO_NEGATIVE_REGULATION_OF_CYSTEINE_TYPE_ENDOPEPTIDASE_ACTIVITY	65	-0.572228	-2.02987	0	0.000389979	42
3	GO_REGULATION_OF_PROTEIN_SECRETION	GO_REGULATION_OF_PROTEIN_SECRETION	253	-0.476446	-2.02261	0	0.000451831	43
3	GO_REGULATION_OF_CELL_ADHESION	GO_REGULATION_OF_CELL_ADHESION	438	-0.452286	-2.01378	0	0.000516859	44
3	GO_POSITIVE_REGULATION_OF_TRANSCRIPTION_FACTOR_IMPORT_INTO_NUCLEUS	GO_POSITIVE_REGULATION_OF_TRANSCRIPTION_FACTOR_IMPORT_INTO_NUCLEUS	41	-0.636166	-2.00739	0	0.000570859	45
3	GO_NEGATIVE_REGULATION_OF_CELLULAR_RESPONSE_TO_INSULIN_STIMULUS	GO_NEGATIVE_REGULATION_OF_CELLULAR_RESPONSE_TO_INSULIN_STIMULUS	22	-0.727884	-2.00671	0	0.000575635	46
3	GO_ENDOTHELIAL_CELL_DIFFERENTIATION	GO_ENDOTHELIAL_CELL_DIFFERENTIATION	46	-0.620473	-2.00427	0	0.000599206	47
3	GO_REGULATION_OF_CELLULAR_RESPONSE_TO_INSULIN_STIMULUS	GO_REGULATION_OF_CELLULAR_RESPONSE_TO_INSULIN_STIMULUS	38	-0.634285	-1.99956	0	0.000630455	48
3	GO_SIDE_OF_MEMBRANE	GO_SIDE_OF_MEMBRANE	271	-0.471556	-1.99669	0	0.00066321	49
3	GO_CELL_CELL_ADHESION	GO_CELL_CELL_ADHESION	353	-0.454704	-1.9915	0	0.000717475	50
3	GO_NEGATIVE_REGULATION_OF_CYTOKINE_SECRETION	GO_NEGATIVE_REGULATION_OF_CYTOKINE_SECRETION	26	-0.689102	-1.98936	0	0.00075087	51
3	GO_LEUKOCYTE_MIGRATION	GO_LEUKOCYTE_MIGRATION	180	-0.490141	-1.98679	0	0.000784242	52
3	GO_EXTRINSIC_APOPTOTIC_SIGNALING_PATHWAY_VIA_DEATH_DOMAIN_RECEPTORS	GO_EXTRINSIC_APOPTOTIC_SIGNALING_PATHWAY_VIA_DEATH_DOMAIN_RECEPTORS	36	-0.645351	-1.98503	0	0.00079536	53
3	GO_SINGLE_ORGANISM_CELL_ADHESION	GO_SINGLE_ORGANISM_CELL_ADHESION	314	-0.455916	-1.97866	0	0.000860622	54
3	GO_REGULATION_OF_TRANSCRIPTION_FACTOR_IMPORT_INTO_NUCLEUS	GO_REGULATION_OF_TRANSCRIPTION_FACTOR_IMPORT_INTO_NUCLEUS	77	-0.551065	-1.97029	0	0.000969259	55
3	GO_REGULATION_OF_SEQUENCE_SPECIFIC_DNA_BINDING_TRANSCRIPTION_FACTOR_ACTIVITY	GO_REGULATION_OF_SEQUENCE_SPECIFIC_DNA_BINDING_TRANSCRIPTION_FACTOR_ACTIVITY	263	-0.461433	-1.96432	0	0.00104544	56
3	GO_POSITIVE_REGULATION_OF_CARTILAGE_DEVELOPMENT	GO_POSITIVE_REGULATION_OF_CARTILAGE_DEVELOPMENT	17	-0.752815	-1.96349	0	0.00106288	57
3	GO_DEATH_RECEPTOR_ACTIVITY	GO_DEATH_RECEPTOR_ACTIVITY	17	-0.749448	-1.95807	0	0.00113108	58
3	GO_REGULATION_OF_RESPONSE_TO_BIOTIC_STIMULUS	GO_REGULATION_OF_RESPONSE_TO_BIOTIC_STIMULUS	165	-0.484291	-1.95746	0	0.00114242	59
3	GO_PROTEIN_HETEROOLIGOMERIZATION	GO_PROTEIN_HETEROOLIGOMERIZATION	68	-0.55793	-1.95493	0	0.00117709	60
3	GO_POSITIVE_REGULATION_OF_INTRINSIC_APOPTOTIC_SIGNALING_PATHWAY	GO_POSITIVE_REGULATION_OF_INTRINSIC_APOPTOTIC_SIGNALING_PATHWAY	46	-0.599865	-1.95231	0	0.00121127	61
3	GO_POSITIVE_REGULATION_OF_STRESS_ACTIVATED_PROTEIN_KINASE_SIGNALING_CASCADE	GO_POSITIVE_REGULATION_OF_STRESS_ACTIVATED_PROTEIN_KINASE_SIGNALING_CASCADE	98	-0.520158	-1.94968	0	0.00125596	62
3	GO_POSITIVE_REGULATION_OF_PROTEIN_SECRETION	GO_POSITIVE_REGULATION_OF_PROTEIN_SECRETION	140	-0.499519	-1.94759	0	0.00129308	63
3	HALLMARK_KRAS_SIGNALING_UP	HALLMARK_KRAS_SIGNALING_UP	145	-0.494156	-1.9456	0	0.00132154	64
3	GO_CELL_SURFACE	GO_CELL_SURFACE	447	-0.433513	-1.9418	0	0.00138808	65
3	GO_NEGATIVE_REGULATION_OF_PEPTIDASE_ACTIVITY	GO_NEGATIVE_REGULATION_OF_PEPTIDASE_ACTIVITY	136	-0.491417	-1.9356	0	0.00152079	66
3	KEGG_CELL_ADHESION_MOLECULES_CAMS	KEGG_CELL_ADHESION_MOLECULES_CAMS	82	-0.539081	-1.93552	0	0.00152289	67
3	KEGG_PROTEASOME	KEGG_PROTEASOME	41	-0.597668	-1.93165	0	0.0016006	68
3	GO_NEGATIVE_REGULATION_OF_APOPTOTIC_SIGNALING_PATHWAY	GO_NEGATIVE_REGULATION_OF_APOPTOTIC_SIGNALING_PATHWAY	152	-0.483092	-1.92438	0	0.00176862	69
3	GO_CELL_ACTIVATION	GO_CELL_ACTIVATION	409	-0.43367	-1.92186	0	0.00184292	70
3	GO_REGULATION_OF_PROTEIN_INSERTION_INTO_MITOCHONDRIAL_MEMBRANE_INVOLVED_IN_APOPTOTIC_SIGNALING_PATHWAY	GO_REGULATION_OF_PROTEIN_INSERTION_INTO_MITOCHONDRIAL_MEMBRANE_INVOLVED_IN_APOPTOTIC_SIGNALING_PATHWAY	28	-0.646764	-1.91554	0.00205339	0.00198132	71
3	GO_POSITIVE_REGULATION_OF_PROTEIN_IMPORT	GO_POSITIVE_REGULATION_OF_PROTEIN_IMPORT	77	-0.536507	-1.91312	0	0.00203896	72
3	GO_POSITIVE_REGULATION_OF_CELL_DEATH	GO_POSITIVE_REGULATION_OF_CELL_DEATH	462	-0.424751	-1.91139	0	0.00207102	73
3	GO_NEGATIVE_REGULATION_OF_GROWTH	GO_NEGATIVE_REGULATION_OF_GROWTH	160	-0.475403	-1.90947	0	0.00210751	74
3	KEGG_TYPE_I_DIABETES_MELLITUS	KEGG_TYPE_I_DIABETES_MELLITUS	34	-0.614689	-1.90894	0	0.00211683	75
3	BIOCARTA_RELA_PATHWAY	BIOCARTA_RELA_PATHWAY	16	-0.745463	-1.90765	0	0.00214689	76
3	GO_MODIFICATION_BY_SYMBIONT_OF_HOST_MORPHOLOGY_OR_PHYSIOLOGY	GO_MODIFICATION_BY_SYMBIONT_OF_HOST_MORPHOLOGY_OR_PHYSIOLOGY	38	-0.594661	-1.89965	0	0.00232557	77
3	GO_RESPONSE_TO_ESTROGEN	GO_RESPONSE_TO_ESTROGEN	142	-0.478307	-1.88792	0	0.00264505	78
3	GO_NEGATIVE_REGULATION_OF_PROTEIN_SECRETION	GO_NEGATIVE_REGULATION_OF_PROTEIN_SECRETION	63	-0.551584	-1.88689	0	0.00266475	79
3	GO_RESPONSE_TO_ALCOHOL	GO_RESPONSE_TO_ALCOHOL	241	-0.447824	-1.88665	0	0.00267304	80
3	GO_REGULATION_OF_PEPTIDE_TRANSPORT	GO_REGULATION_OF_PEPTIDE_TRANSPORT	161	-0.46384	-1.87677	0	0.00302003	81
3	GO_RESPONSE_TO_HEAT	GO_RESPONSE_TO_HEAT	63	-0.537381	-1.87609	0	0.0030347	82
3	GO_MODIFICATION_OF_MORPHOLOGY_OR_PHYSIOLOGY_OF_OTHER_ORGANISM	GO_MODIFICATION_OF_MORPHOLOGY_OR_PHYSIOLOGY_OF_OTHER_ORGANISM	71	-0.536452	-1.87531	0	0.00305673	83
3	GO_GLAND_MORPHOGENESIS	GO_GLAND_MORPHOGENESIS	60	-0.548129	-1.86851	0	0.00329336	84
3	GO_NEGATIVE_REGULATION_OF_EPITHELIAL_CELL_APOPTOTIC_PROCESS	GO_NEGATIVE_REGULATION_OF_EPITHELIAL_CELL_APOPTOTIC_PROCESS	20	-0.695339	-1.86812	0	0.00329673	85
3	GO_INTRINSIC_APOPTOTIC_SIGNALING_PATHWAY_IN_RESPONSE_TO_ENDOPLASMIC_RETICULUM_STRESS	GO_INTRINSIC_APOPTOTIC_SIGNALING_PATHWAY_IN_RESPONSE_TO_ENDOPLASMIC_RETICULUM_STRESS	23	-0.646468	-1.86504	0.0043384	0.00340478	86
3	GO_HYDROLASE_ACTIVITY_ACTING_ON_CARBON_NITROGEN_BUT_NOT_PEPTIDE_BONDS_IN_CYCLIC_AMIDINES	GO_HYDROLASE_ACTIVITY_ACTING_ON_CARBON_NITROGEN_BUT_NOT_PEPTIDE_BONDS_IN_CYCLIC_AMIDINES	27	-0.638965	-1.86344	0	0.00346868	87
3	GO_REGULATION_OF_NUCLEOCYTOPLASMIC_TRANSPORT	GO_REGULATION_OF_NUCLEOCYTOPLASMIC_TRANSPORT	177	-0.463616	-1.86187	0	0.00354981	88
3	BIOCARTA_NTHI_PATHWAY	BIOCARTA_NTHI_PATHWAY	22	-0.665353	-1.85656	0	0.00376197	89
3	GO_POSITIVE_REGULATION_OF_LAMELLIPODIUM_ORGANIZATION	GO_POSITIVE_REGULATION_OF_LAMELLIPODIUM_ORGANIZATION	15	-0.724296	-1.85569	0	0.00380639	90
3	GO_NUCLEOTIDE_BINDING_DOMAIN_LEUCINE_RICH_REPEAT_CONTAINING_RECEPTOR_SIGNALING_PATHWAY	GO_NUCLEOTIDE_BINDING_DOMAIN_LEUCINE_RICH_REPEAT_CONTAINING_RECEPTOR_SIGNALING_PATHWAY	22	-0.662778	-1.85456	0	0.00385153	91
3	GO_REGULATION_OF_MITOCHONDRIAL_OUTER_MEMBRANE_PERMEABILIZATION_INVOLVED_IN_APOPTOTIC_SIGNALING_PATHWAY	GO_REGULATION_OF_MITOCHONDRIAL_OUTER_MEMBRANE_PERMEABILIZATION_INVOLVED_IN_APOPTOTIC_SIGNALING_PATHWAY	37	-0.604827	-1.85355	0	0.00388383	92
3	GO_POSITIVE_REGULATION_OF_CELL_PROLIFERATION	GO_POSITIVE_REGULATION_OF_CELL_PROLIFERATION	489	-0.410643	-1.84827	0	0.00411081	93
3	GO_POSITIVE_REGULATION_OF_MITOCHONDRIAL_OUTER_MEMBRANE_PERMEABILIZATION_INVOLVED_IN_APOPTOTIC_SIGNALING_PATHWAY	GO_POSITIVE_REGULATION_OF_MITOCHONDRIAL_OUTER_MEMBRANE_PERMEABILIZATION_INVOLVED_IN_APOPTOTIC_SIGNALING_PATHWAY	33	-0.592039	-1.84725	0	0.00417398	94
3	GO_POSITIVE_REGULATION_OF_NUCLEOCYTOPLASMIC_TRANSPORT	GO_POSITIVE_REGULATION_OF_NUCLEOCYTOPLASMIC_TRANSPORT	94	-0.492169	-1.84494	0	0.00426547	95
3	GO_POSITIVE_REGULATION_OF_SECRETION	GO_POSITIVE_REGULATION_OF_SECRETION	224	-0.437399	-1.84396	0	0.00431194	96
3	GO_NEGATIVE_REGULATION_OF_ENDOTHELIAL_CELL_APOPTOTIC_PROCESS	GO_NEGATIVE_REGULATION_OF_ENDOTHELIAL_CELL_APOPTOTIC_PROCESS	15	-0.742276	-1.84271	0	0.00437318	97
3	GO_REGULATION_OF_INTRACELLULAR_TRANSPORT	GO_REGULATION_OF_INTRACELLULAR_TRANSPORT	448	-0.411726	-1.8418	0	0.00441558	98
3	GO_POSITIVE_REGULATION_OF_ESTABLISHMENT_OF_PROTEIN_LOCALIZATION	GO_POSITIVE_REGULATION_OF_ESTABLISHMENT_OF_PROTEIN_LOCALIZATION	359	-0.419586	-1.84053	0	0.00448621	99
3	BIOCARTA_BIOPEPTIDES_PATHWAY	BIOCARTA_BIOPEPTIDES_PATHWAY	34	-0.604077	-1.83486	0	0.00479178	100
3	GO_MOLTING_CYCLE	GO_MOLTING_CYCLE	38	-0.580063	-1.83327	0	0.00487519	101
3	GO_RESPONSE_TO_ESTRADIOL	GO_RESPONSE_TO_ESTRADIOL	93	-0.49636	-1.83255	0	0.0049175	102
3	GO_POSITIVE_REGULATION_OF_VASCULATURE_DEVELOPMENT	GO_POSITIVE_REGULATION_OF_VASCULATURE_DEVELOPMENT	86	-0.507021	-1.8313	0	0.00496037	103
3	GO_RESPONSE_TO_VITAMIN	GO_RESPONSE_TO_VITAMIN	82	-0.505613	-1.83062	0	0.00497776	104
3	GO_NEGATIVE_REGULATION_OF_PROTEOLYSIS	GO_NEGATIVE_REGULATION_OF_PROTEOLYSIS	204	-0.442071	-1.82697	0	0.0051708	105
3	GO_CELL_CELL_SIGNALING	GO_CELL_CELL_SIGNALING	363	-0.412889	-1.82662	0	0.00517729	106
3	GO_REGULATION_OF_PROTEIN_IMPORT	GO_REGULATION_OF_PROTEIN_IMPORT	143	-0.462508	-1.82652	0	0.00518003	107
3	GO_HEPARIN_BINDING	GO_HEPARIN_BINDING	77	-0.508341	-1.82275	0	0.00540503	108
3	GO_GROWTH_FACTOR_RECEPTOR_BINDING	GO_GROWTH_FACTOR_RECEPTOR_BINDING	79	-0.511973	-1.82226	0	0.00543587	109
3	GO_REGULATION_OF_MYOTUBE_DIFFERENTIATION	GO_REGULATION_OF_MYOTUBE_DIFFERENTIATION	31	-0.604895	-1.81978	0.00193798	0.00556021	110
3	GO_REGULATION_OF_MEMBRANE_PERMEABILITY	GO_REGULATION_OF_MEMBRANE_PERMEABILITY	57	-0.53411	-1.81317	0	0.00594849	111
3	GO_NEGATIVE_REGULATION_OF_RESPONSE_TO_BIOTIC_STIMULUS	GO_NEGATIVE_REGULATION_OF_RESPONSE_TO_BIOTIC_STIMULUS	21	-0.664515	-1.81235	0.00220751	0.0059893	112
3	GO_REGULATION_OF_ENDOPLASMIC_RETICULUM_UNFOLDED_PROTEIN_RESPONSE	GO_REGULATION_OF_ENDOPLASMIC_RETICULUM_UNFOLDED_PROTEIN_RESPONSE	24	-0.639291	-1.81149	0	0.00602968	113
3	GO_NEGATIVE_REGULATION_OF_RESPONSE_TO_ENDOPLASMIC_RETICULUM_STRESS	GO_NEGATIVE_REGULATION_OF_RESPONSE_TO_ENDOPLASMIC_RETICULUM_STRESS	29	-0.613482	-1.81056	0.00214592	0.00608734	114
3	GO_DOUBLE_STRANDED_RNA_BINDING	GO_DOUBLE_STRANDED_RNA_BINDING	56	-0.539037	-1.80886	0.00192678	0.00618667	115
3	BIOCARTA_PROTEASOME_PATHWAY	BIOCARTA_PROTEASOME_PATHWAY	26	-0.617081	-1.80504	0	0.00643708	116
3	GO_CELLULAR_RESPONSE_TO_VITAMIN	GO_CELLULAR_RESPONSE_TO_VITAMIN	22	-0.662787	-1.80385	0.00826446	0.00651577	117
3	GO_CELLULAR_RESPONSE_TO_MECHANICAL_STIMULUS	GO_CELLULAR_RESPONSE_TO_MECHANICAL_STIMULUS	62	-0.52003	-1.79906	0	0.00685539	118
3	GO_RESPONSE_TO_DRUG	GO_RESPONSE_TO_DRUG	304	-0.414214	-1.79717	0	0.00698458	119
3	GO_CELLULAR_RESPONSE_TO_GROWTH_HORMONE_STIMULUS	GO_CELLULAR_RESPONSE_TO_GROWTH_HORMONE_STIMULUS	15	-0.699601	-1.79695	0.00209644	0.00698651	120
3	GO_CARDIAC_CELL_DEVELOPMENT	GO_CARDIAC_CELL_DEVELOPMENT	30	-0.597504	-1.79069	0.00414079	0.00746671	121
3	GO_POSITIVE_REGULATION_OF_PROTEIN_OLIGOMERIZATION	GO_POSITIVE_REGULATION_OF_PROTEIN_OLIGOMERIZATION	18	-0.67759	-1.79073	0	0.00747164	122
3	GO_REGULATION_OF_SECRETION	GO_REGULATION_OF_SECRETION	419	-0.402639	-1.78998	0	0.00750812	123
3	GO_REGULATION_OF_COAGULATION	GO_REGULATION_OF_COAGULATION	53	-0.53258	-1.78809	0.006	0.00760982	124
3	GO_RESPONSE_TO_ACID_CHEMICAL	GO_RESPONSE_TO_ACID_CHEMICAL	205	-0.431505	-1.78536	0	0.00779793	125
3	GO_CYSTEINE_TYPE_ENDOPEPTIDASE_REGULATOR_ACTIVITY_INVOLVED_IN_APOPTOTIC_PROCESS	GO_CYSTEINE_TYPE_ENDOPEPTIDASE_REGULATOR_ACTIVITY_INVOLVED_IN_APOPTOTIC_PROCESS	30	-0.594658	-1.78208	0.00210526	0.00804729	126
3	GO_POSITIVE_REGULATION_OF_INTRACELLULAR_TRANSPORT	GO_POSITIVE_REGULATION_OF_INTRACELLULAR_TRANSPORT	268	-0.416858	-1.77994	0	0.00821945	127
3	GO_NEGATIVE_REGULATION_OF_CELL_ADHESION	GO_NEGATIVE_REGULATION_OF_CELL_ADHESION	160	-0.444087	-1.77888	0	0.00830507	128
3	GO_INTRINSIC_APOPTOTIC_SIGNALING_PATHWAY_IN_RESPONSE_TO_DNA_DAMAGE_BY_P53_CLASS_MEDIATOR	GO_INTRINSIC_APOPTOTIC_SIGNALING_PATHWAY_IN_RESPONSE_TO_DNA_DAMAGE_BY_P53_CLASS_MEDIATOR	23	-0.639719	-1.77706	0.00210526	0.00846995	129
3	GO_THREONINE_TYPE_PEPTIDASE_ACTIVITY	GO_THREONINE_TYPE_PEPTIDASE_ACTIVITY	18	-0.664026	-1.77516	0.00408998	0.00860319	130
3	GO_SKIN_DEVELOPMENT	GO_SKIN_DEVELOPMENT	104	-0.470204	-1.77434	0	0.00868257	131
3	GO_RESPONSE_TO_TEMPERATURE_STIMULUS	GO_RESPONSE_TO_TEMPERATURE_STIMULUS	103	-0.466855	-1.77211	0.00185529	0.00886635	132
3	GO_RESPONSE_TO_STEROID_HORMONE	GO_RESPONSE_TO_STEROID_HORMONE	308	-0.407997	-1.7676	0	0.00926324	133
3	GO_REGULATION_OF_CYTOPLASMIC_TRANSPORT	GO_REGULATION_OF_CYTOPLASMIC_TRANSPORT	352	-0.400222	-1.76513	0	0.00946962	134
3	GO_MICROVILLUS	GO_MICROVILLUS	48	-0.548067	-1.76445	0.00194932	0.00952667	135
3	GO_APOPTOTIC_MITOCHONDRIAL_CHANGES	GO_APOPTOTIC_MITOCHONDRIAL_CHANGES	45	-0.54054	-1.76178	0.00383877	0.00978008	136
3	GO_PROTEIN_KINASE_B_SIGNALING	GO_PROTEIN_KINASE_B_SIGNALING	28	-0.599821	-1.76063	0.00379507	0.00987987	137
3	GO_GROWTH_FACTOR_ACTIVITY	GO_GROWTH_FACTOR_ACTIVITY	76	-0.487585	-1.75899	0.00189753	0.0100456	138
[truncated: 635 more rows]

## Sheet: P<0.05
Filter	NAME	SIZE	ES	NES	NOM p-val	FDR q-val			Legend
[truncated: 948 more rows]
